# Supplementary material for: Genomic insights into the Ixodes scapularis tick vector of Lyme disease
Source: Nat Commun. 2016 Feb 9;7:10507. doi: 10.1038/ncomms10507 (PMC4748124; doi:10.1038/ncomms10507)
Supplement: Supplementary Information — Supplementary Figures 1-25, Supplementary Tables 1-38, Supplementary Note 1, Supplementary Methods and Supplementary References [file ncomms10507-s1.pdf]

## Supplementary Figures

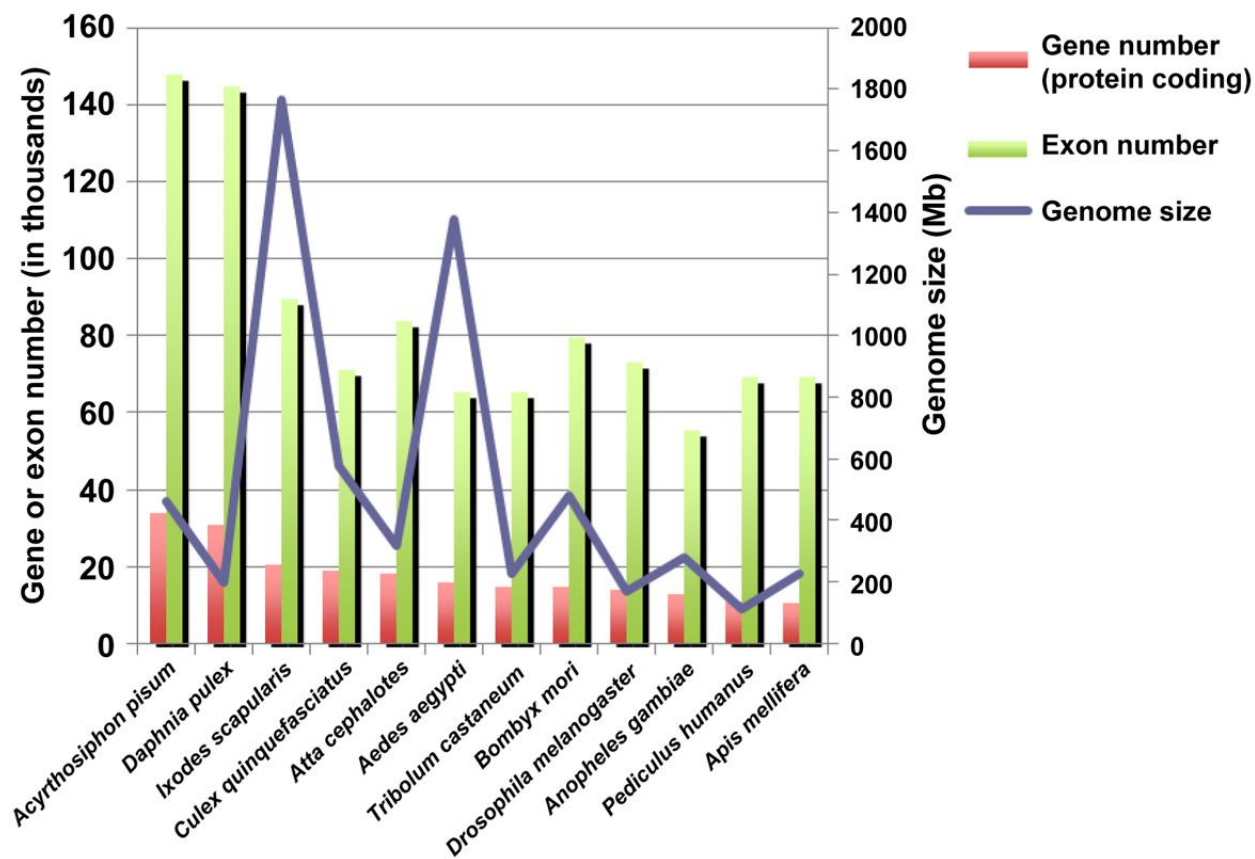

**Supplementary Fig. 1. Comparison of the number of genes, exons and genome size (in Mb) in 12 arthropod genomes (based on EnsemblGenomes release 12).**

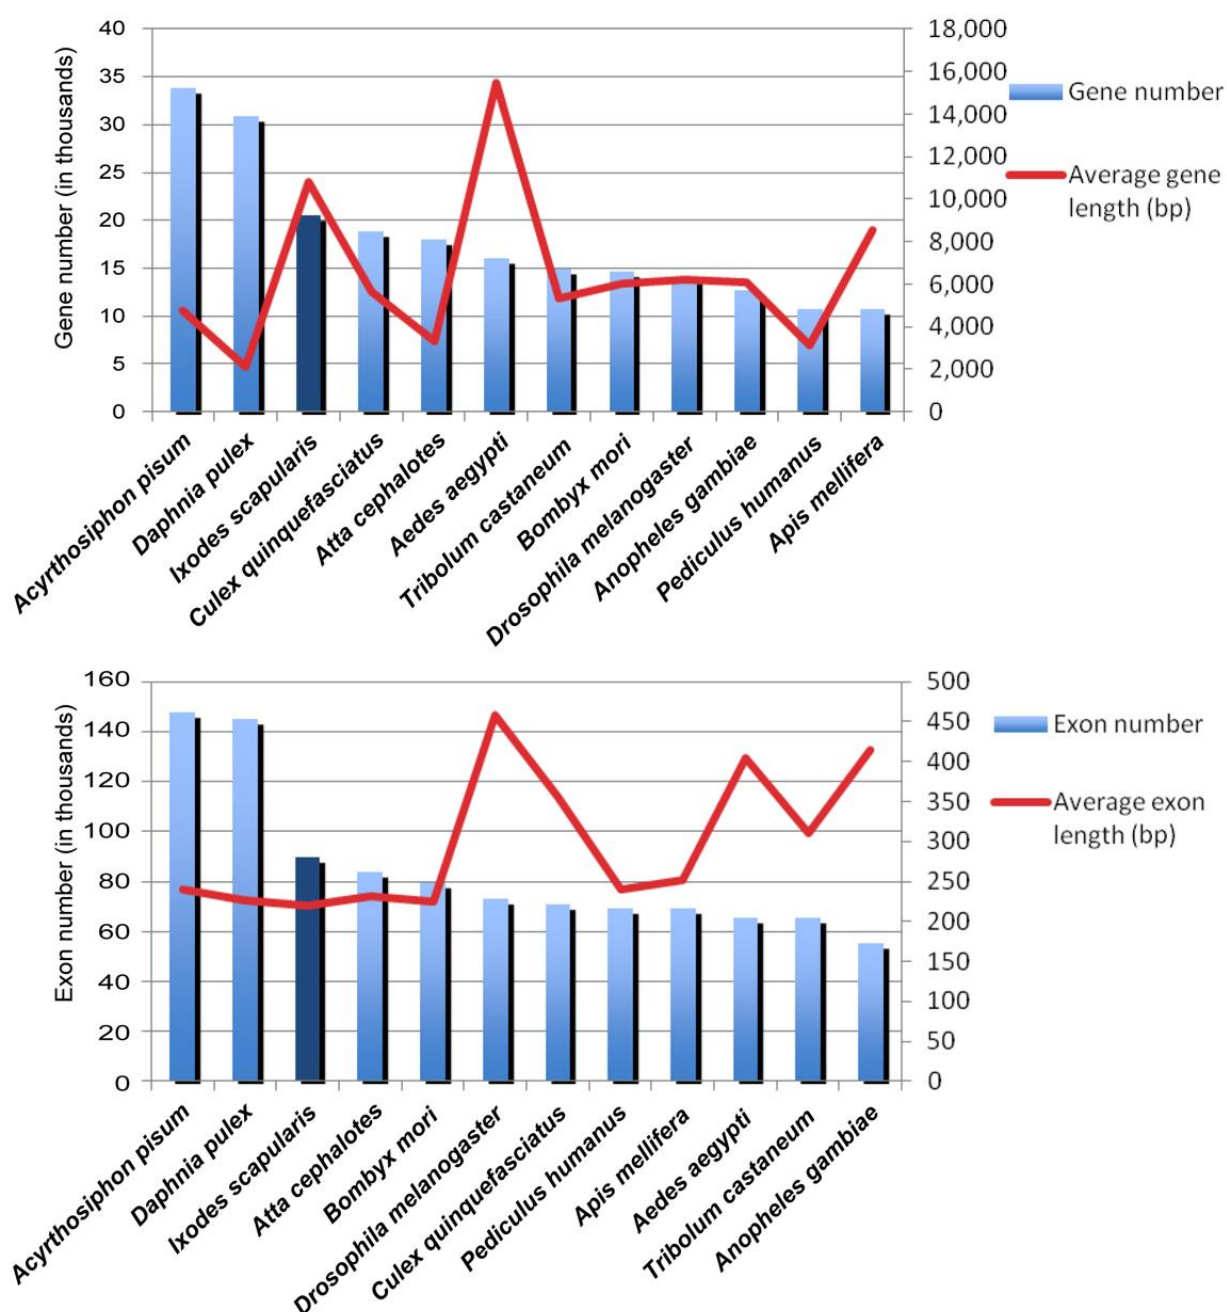

**Supplementary Fig. 2. (a) Comparison of the number of genes and their average length in 12 arthropod genomes (based on EnsemblGenomes release 12). (b) Comparison of the number of exons and their average length in 12 arthropod genomes (based on EnsemblGenomes release 12).**

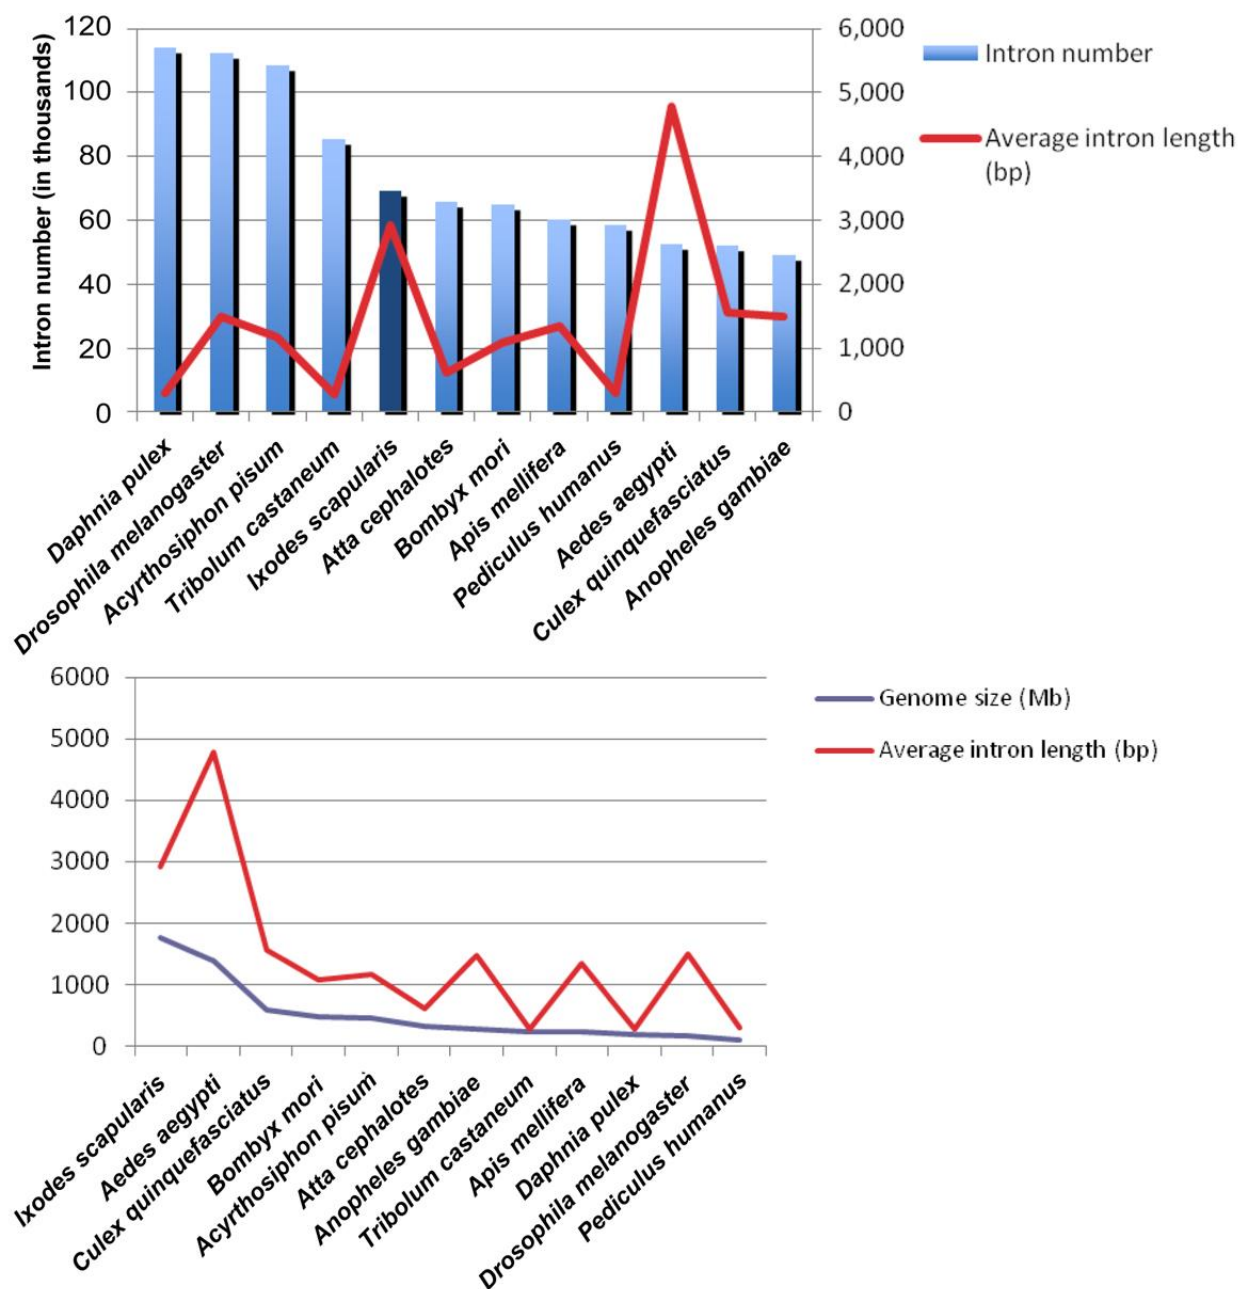

**Supplementary Fig. 3. (a) Comparison of the number of introns and their average length in 12 arthropod genomes (based on EnsemblGenomes release 12). (b) Comparison of the genome size and average intron length in 12 arthropods genomes (based on EnsemblGenomes release 12).**

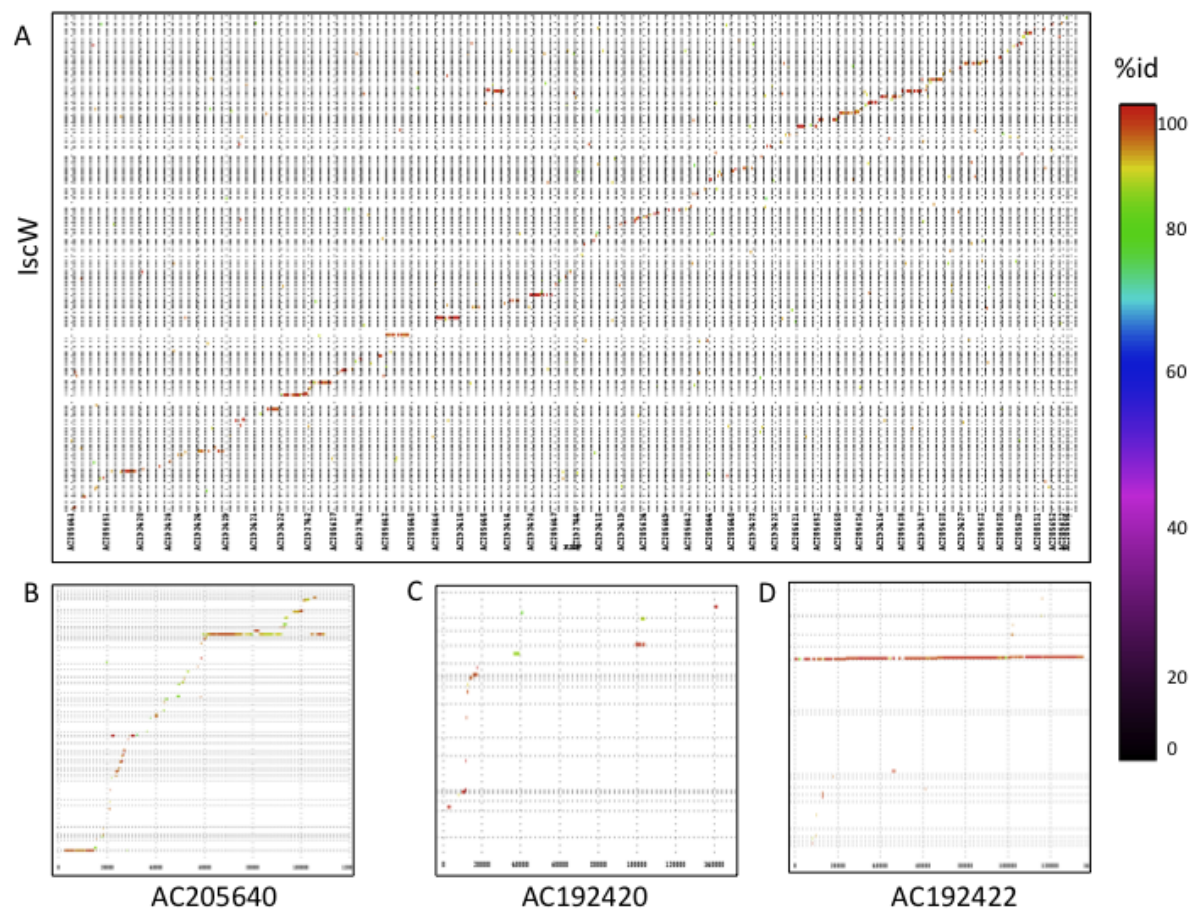

**Supplementary Fig. 4. BAC mapping to *I. scapularis* genome scaffolds.**

Annotated scaffolds were mapped to 45 sequenced BACs to assess the level of representation in the current annotated assembly. **(a)**: Nucmer alignments of all BACs (x axis) to IscW annotated scaffolds (y axis). **(b, c and d)**: Individual BAC sequences represented in two or more IscW scaffolds **(b)**, BAC sequence does not align significantly to any scaffold **(b)** and BAC sequence is represented by a single IscW scaffold **(c)**. All mappings are shown in Supplementary Table 4.

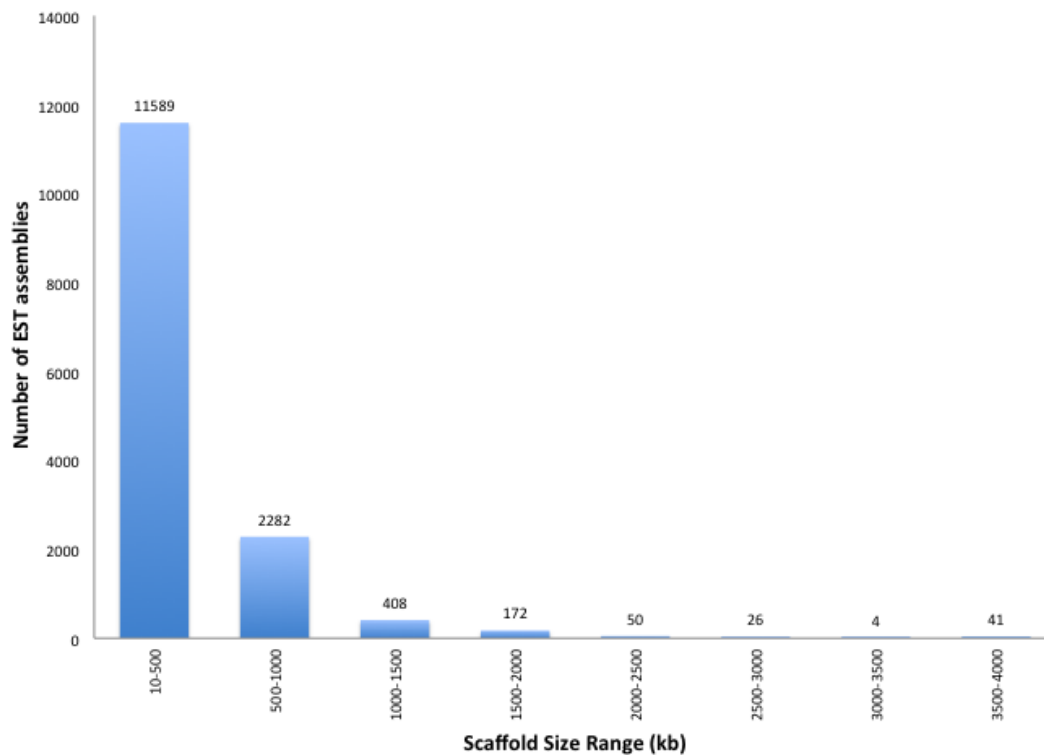

**Supplementary Fig. 5. Alignment of *Ixodes scapularis* Expressed Sequence Tag (EST) and cDNA sequences to IscaW1 scaffolds.** The *I. scapularis* EST set, comprising 193,151 EST and cDNA sequences, was aligned to the IscaW1 scaffold sequences and assembled. EST sequences were utilized to generate high quality training sets and improve gene structures. ESTs assembled using PASA, were aligned to the core scaffolds representing the annotated genome. ESTs were also used to evaluate and capture potential genes in small contigs that were not initially included in the annotated scaffolds. EST hits to small contigs that are not part of the annotated scaffolds typically represent transcripts derived from transposable elements such as non-LTR type elements, and do not contain an open reading frame.

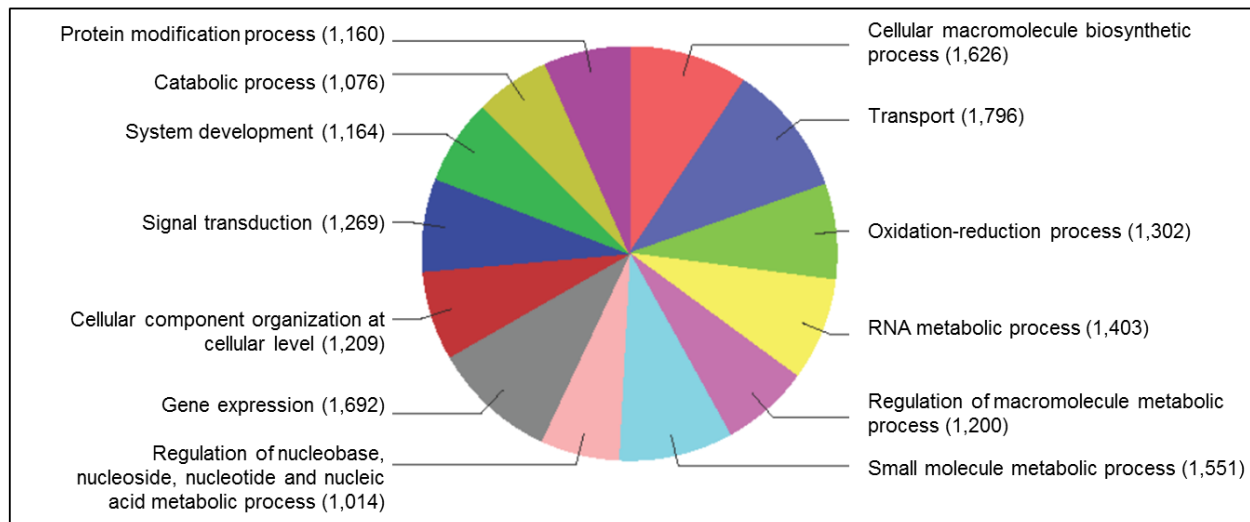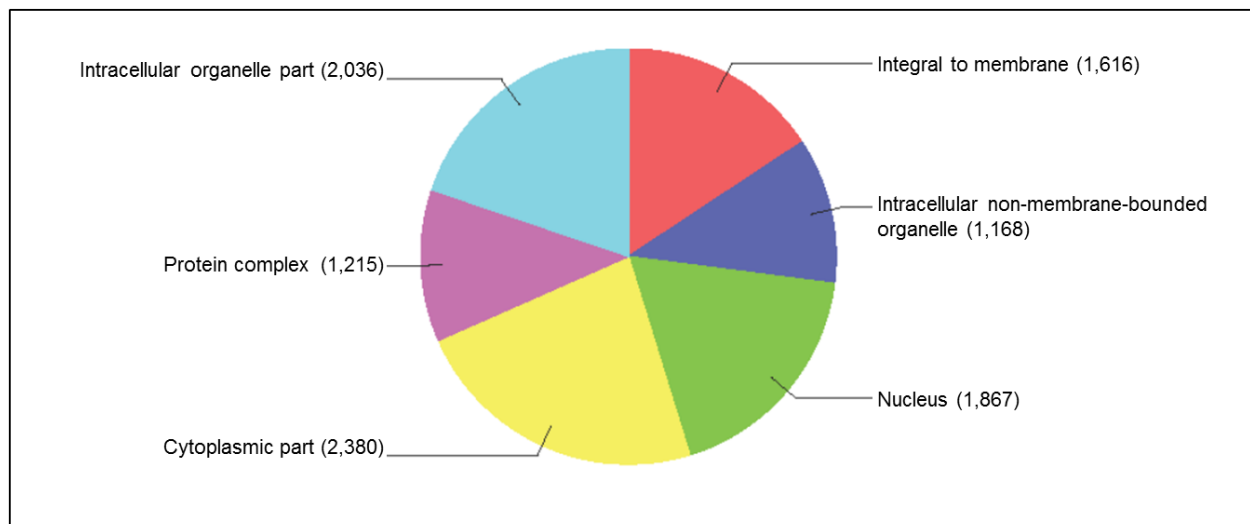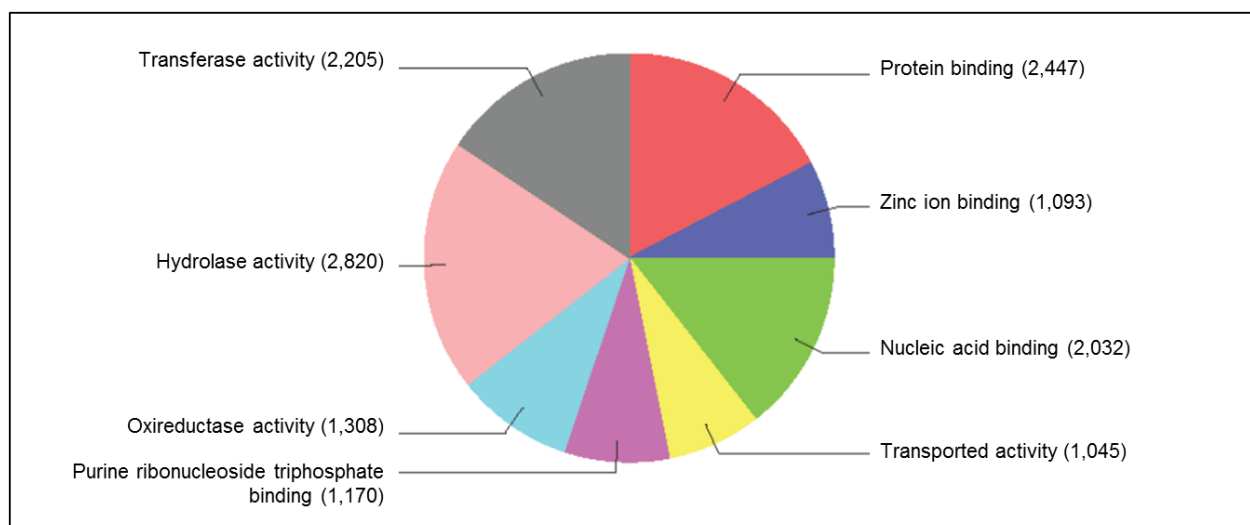

**Supplementary Fig. 6. Functional analysis of the *Ixodes scapularis* IscaW1 gene models showing the gene ontology results for: (a) Biological Process (b) Cellular**

**Component and (c) Molecular Function categories.** Multi-level pie charts show all GO terms that exceed the cut-off value of 1,000 sequences. Numbers in parentheses indicate the total number of sequences assigned to a specific GO term.

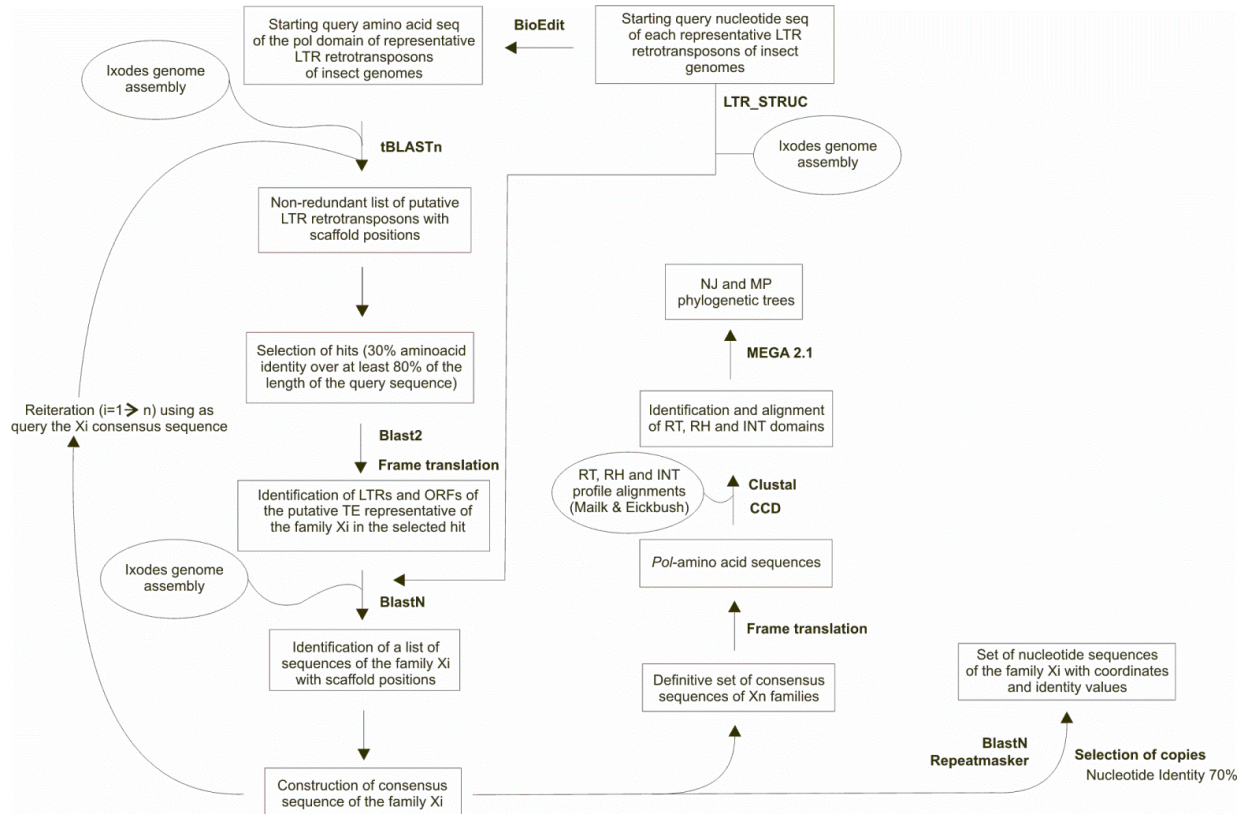

**Supplementary Fig. 7. Schematic showing the strategy employed for the identification of all LTR retrotransposons in the genome of *Ixodes scapularis*.** b. Identification of LTR elements. b. Phylogenetic analysis. C. Identification of the number of copies of each LTR retrotransposon. Circles indicate databases used for searches. Rectangles indicate input/output files and. Programs used are written in bold beside arrows. See Supplementary text for details. CCD = Conserved Domain Database, RT = Retrotranscriptase; RH = Ribonuclease; INT = Integrase.

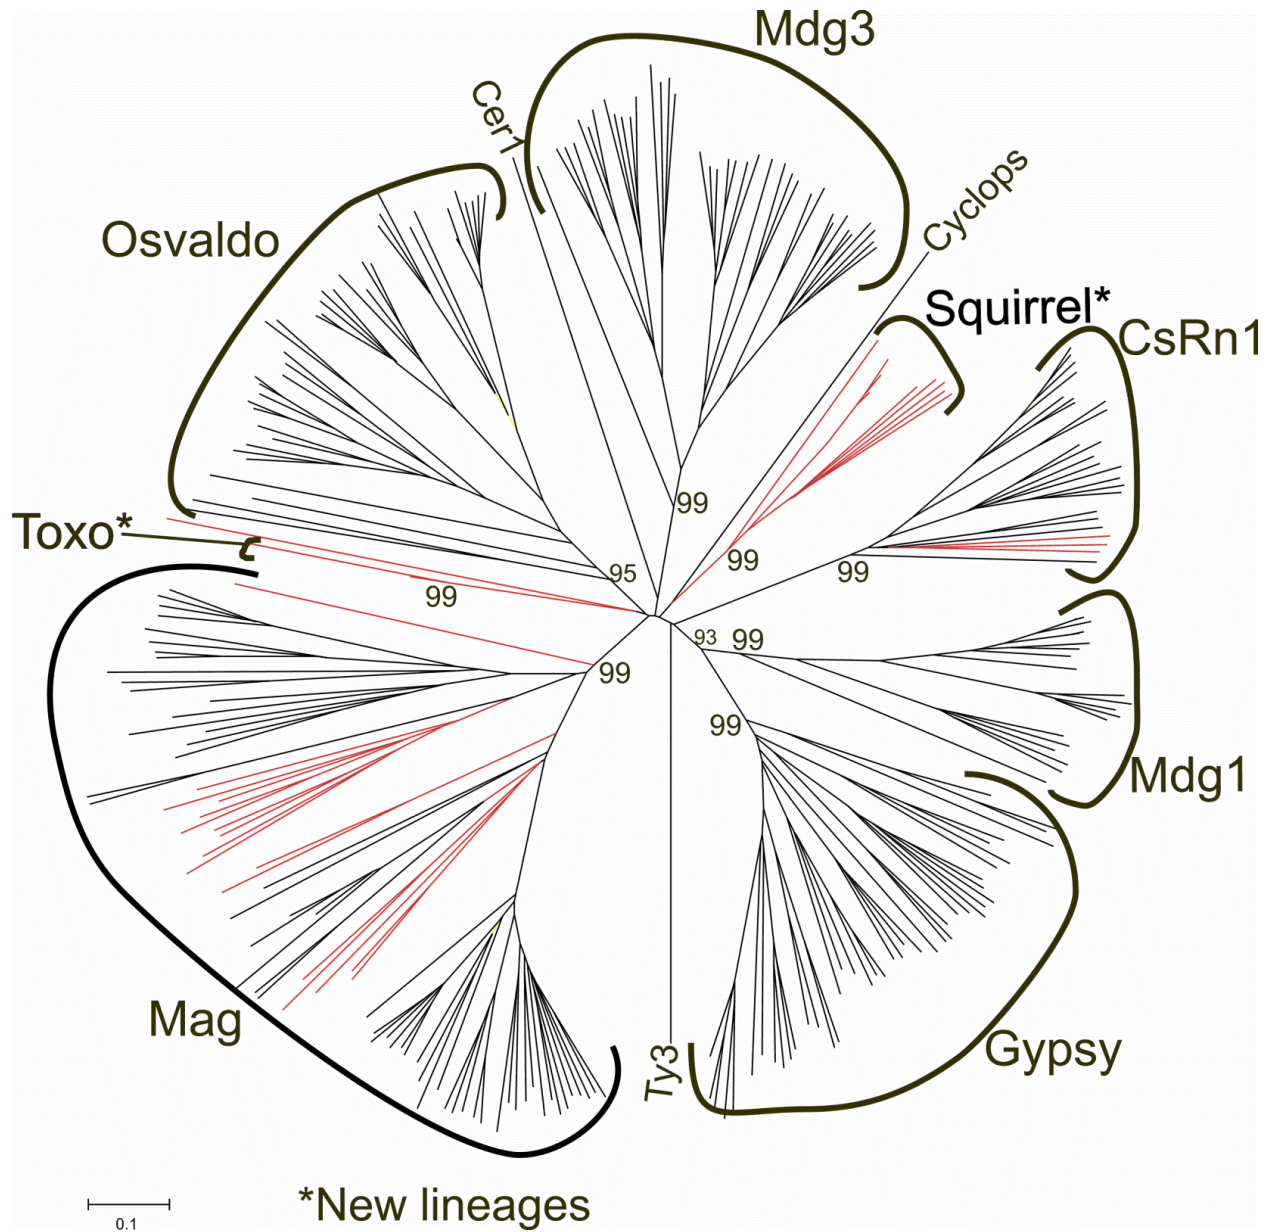

**Supplementary Fig. 8. New Ty3/gypsy lineages in the genome of *Ixodes scapularis*.** Phylogenetic relationships between the Ty3/gypsy retrotransposons of *Ixodes scapularis* and insect genomes inferred by the NJ method and based on the conserved domains of RT, RnaseH, and INT<sup>51</sup>. Bootstrap values (1,000 replications) supporting the clusters of each lineage of the Ty3/gypsy family are shown. Names of Ty3/gypsy lineages are shown in capitals. Two new lineages (named Toxo and Squirrel; indicated by asterisk) are supported by bootstrap values of 99%. The phylogeny contains elements from *Ixodes scapularis* (red branches), *Drosophila melanogaster*, *Anopheles gambiae*, *Aedes aegypti*, and *Culex pipiens*. Non-insect representative elements in the phylogeny are the retrotransposons Ty3 from the yeast *Saccharomyces cerevisiae*, Cyclops from the plant *Vicia faba*, and Cer1 from the Nematoda *Caenorhabditis elegans*.

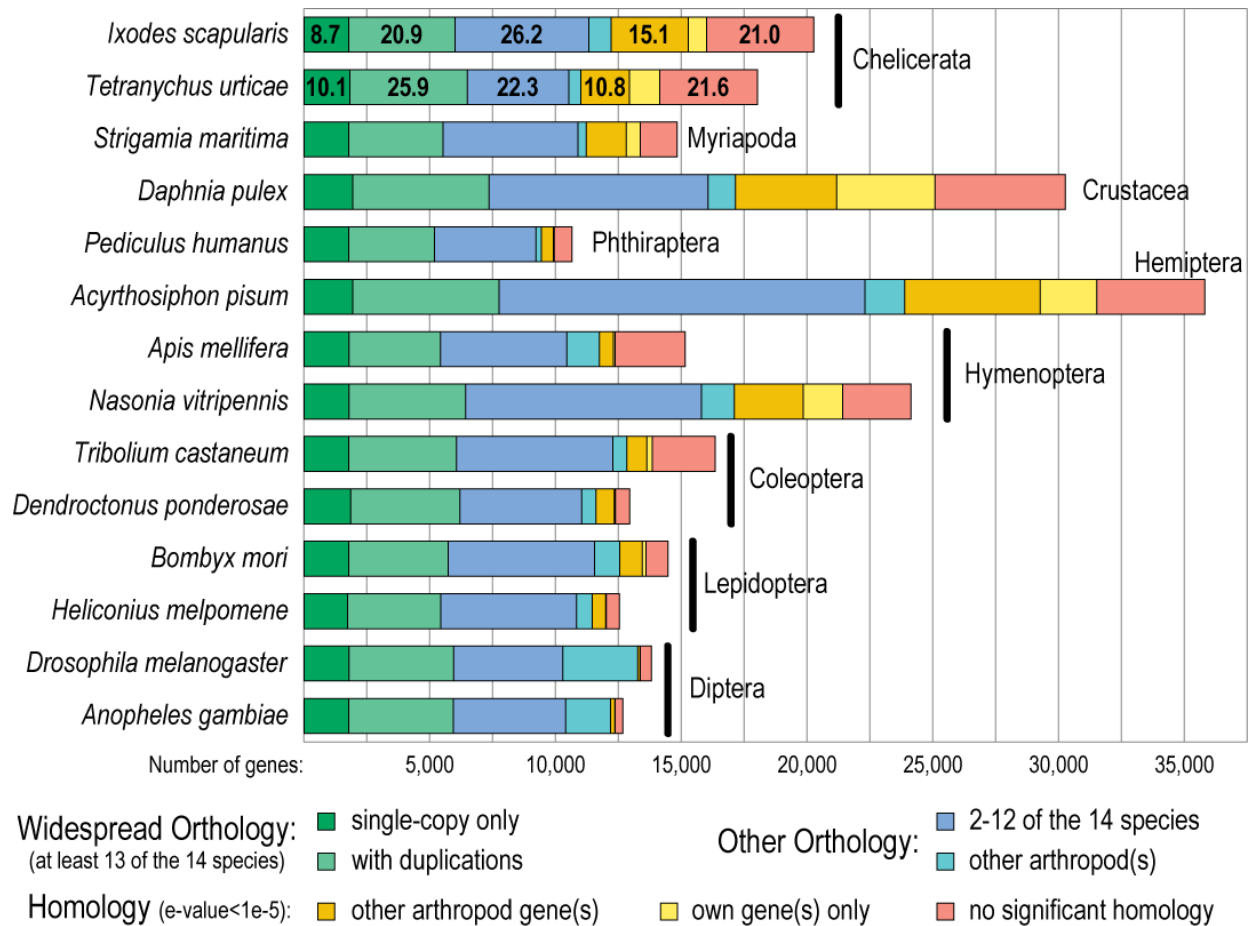

**Supplementary Fig. 9. *Ixodes scapularis* gene orthology and homology across Arthropoda.** Orthologous and homologous relations between *I. scapularis* genes and those from other sequenced arthropods were examined using orthologous groups delineated across 87 arthropod species from [www.OrthoDB.org](http://www.OrthoDB.org)<sup>25</sup> (release 8). About 30% of *I. scapularis* genes have recognizable orthologs in all or almost all of the representative species selected from nine different arthropod lineages (green fractions, at least 13 of the 14 species - single-copy or with duplications). A further ~30% of *I. scapularis* genes are less widely conserved across Arthropoda (blue fractions, present in 2-12 of the 14 species, or present in at least one of the 73 other arthropods). Of the remaining *I. scapularis* genes with no identifiable orthology, about half exhibit homology (e-value < 1e-05) to genes from the other 86 arthropods or to other *I. scapularis* genes (yellow fractions, homology to other arthropod genes or homology only to other genes in the same genome). The two chelicerates show very similar fractions of genes that currently have no significant homologs in other arthropod genomes, so-called “orphan” genes. The major fractions of the two chelicerate species’ gene sets are labeled with the corresponding percentages of their total gene counts.

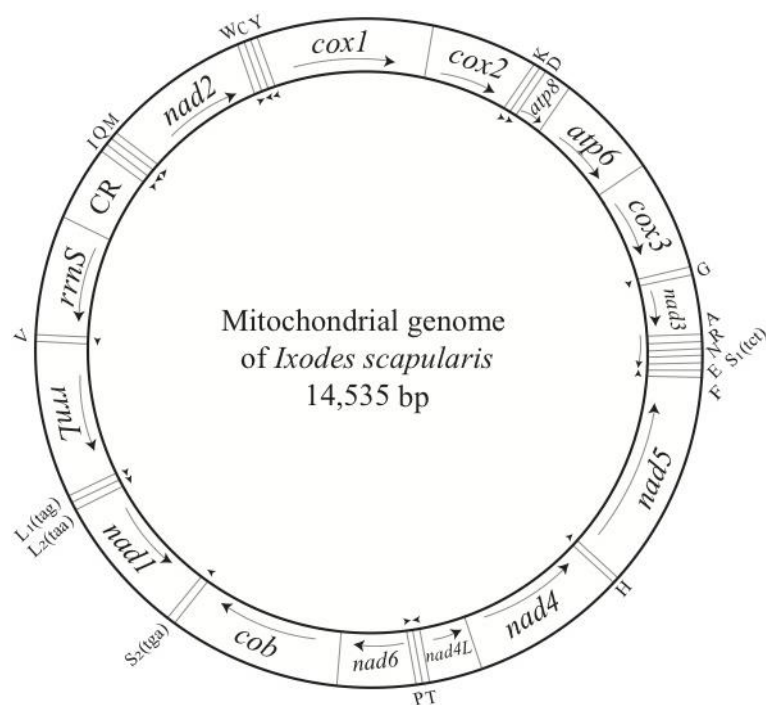

*Ixodes scapularis* and other non-Australasian *Ixodes* ticks (family Ixodidae)

|      |      |    |      |      |      |   |      |   |   |   |                |   |   |      |   |      |       |   |   |      |     |                |      |                |                |      |   |      |    |   |   |   |      |   |   |   |
|------|------|----|------|------|------|---|------|---|---|---|----------------|---|---|------|---|------|-------|---|---|------|-----|----------------|------|----------------|----------------|------|---|------|----|---|---|---|------|---|---|---|
| cox1 | cox2 | KD | atp8 | atp6 | cox3 | G | nad3 | A | R | N | S <sub>1</sub> | E | F | nad5 | H | nad4 | nad4L | T | P | nad6 | cob | S <sub>1</sub> | nad1 | L <sub>1</sub> | L <sub>2</sub> | rrnL | V | rrnS | CR | I | Q | M | nad2 | W | C | Y |
|------|------|----|------|------|------|---|------|---|---|---|----------------|---|---|------|---|------|-------|---|---|------|-----|----------------|------|----------------|----------------|------|---|------|----|---|---|---|------|---|---|---|

Australasian *Ixodes* ticks (family Ixodidae)

|      |      |    |      |      |      |   |      |   |   |   |                |   |   |      |   |      |       |   |   |      |     |                |      |                |                |       |      |   |      |       |   |   |   |      |   |   |   |
|------|------|----|------|------|------|---|------|---|---|---|----------------|---|---|------|---|------|-------|---|---|------|-----|----------------|------|----------------|----------------|-------|------|---|------|-------|---|---|---|------|---|---|---|
| cox1 | cox2 | KD | atp8 | atp6 | cox3 | G | nad3 | A | R | N | S <sub>1</sub> | E | F | nad5 | H | nad4 | nad4L | T | P | nad6 | cob | S <sub>1</sub> | nad1 | L <sub>1</sub> | L <sub>2</sub> | CR #2 | rrnL | V | rrnS | CR #1 | I | Q | M | nad2 | W | C | Y |
|------|------|----|------|------|------|---|------|---|---|---|----------------|---|---|------|---|------|-------|---|---|------|-----|----------------|------|----------------|----------------|-------|------|---|------|-------|---|---|---|------|---|---|---|

Metastriate ticks (family Ixodidae)

|      |      |    |      |      |      |   |      |   |   |   |                |   |   |      |   |      |       |   |   |      |     |                |      |                |                |       |   |   |   |      |   |      |       |   |   |      |     |                |                |       |   |   |      |   |   |   |
|------|------|----|------|------|------|---|------|---|---|---|----------------|---|---|------|---|------|-------|---|---|------|-----|----------------|------|----------------|----------------|-------|---|---|---|------|---|------|-------|---|---|------|-----|----------------|----------------|-------|---|---|------|---|---|---|
| cox1 | cox2 | KD | atp8 | atp6 | cox3 | G | nad3 | A | R | N | S <sub>1</sub> | E | F | nad5 | H | nad4 | nad4L | T | P | nad6 | cob | S <sub>1</sub> | nad1 | L <sub>1</sub> | L <sub>2</sub> | CR #1 | I | Q | F | nad5 | H | nad4 | nad4L | T | P | nad6 | cob | S <sub>1</sub> | L <sub>1</sub> | CR #2 | C | M | nad2 | W | C | Y |
|------|------|----|------|------|------|---|------|---|---|---|----------------|---|---|------|---|------|-------|---|---|------|-----|----------------|------|----------------|----------------|-------|---|---|---|------|---|------|-------|---|---|------|-----|----------------|----------------|-------|---|---|------|---|---|---|

Soft ticks (family Argasidae) and nuttalliellid ticks (family Nuttalliellidae)

|      |      |    |      |      |      |   |      |   |   |   |                |   |   |      |   |      |       |   |   |      |     |                |      |                |                |      |   |      |    |   |   |   |      |   |   |   |
|------|------|----|------|------|------|---|------|---|---|---|----------------|---|---|------|---|------|-------|---|---|------|-----|----------------|------|----------------|----------------|------|---|------|----|---|---|---|------|---|---|---|
| cox1 | cox2 | KD | atp8 | atp6 | cox3 | G | nad3 | A | R | N | S <sub>1</sub> | E | F | nad5 | H | nad4 | nad4L | T | P | nad6 | cob | S <sub>1</sub> | nad1 | L <sub>1</sub> | L <sub>2</sub> | rrnL | V | rrnS | CR | I | Q | M | nad2 | W | C | Y |
|------|------|----|------|------|------|---|------|---|---|---|----------------|---|---|------|---|------|-------|---|---|------|-----|----------------|------|----------------|----------------|------|---|------|----|---|---|---|------|---|---|---|

Putative ancestor of insects and crustaceans

|      |                |      |    |      |      |      |   |      |   |   |   |                |   |   |      |   |      |       |   |   |      |     |                |      |                |                |      |   |      |    |   |   |   |      |   |   |   |
|------|----------------|------|----|------|------|------|---|------|---|---|---|----------------|---|---|------|---|------|-------|---|---|------|-----|----------------|------|----------------|----------------|------|---|------|----|---|---|---|------|---|---|---|
| cox1 | L <sub>2</sub> | cox2 | KD | atp8 | atp6 | cox3 | G | nad3 | A | R | N | S <sub>1</sub> | E | F | nad5 | H | nad4 | nad4L | T | P | nad6 | cob | S <sub>1</sub> | nad1 | L <sub>1</sub> | L <sub>2</sub> | rrnL | V | rrnS | CR | I | Q | M | nad2 | W | C | Y |
|------|----------------|------|----|------|------|------|---|------|---|---|---|----------------|---|---|------|---|------|-------|---|---|------|-----|----------------|------|----------------|----------------|------|---|------|----|---|---|---|------|---|---|---|

Putative ancestor of arthropods

|      |      |    |      |      |      |   |      |   |   |   |                |   |   |      |   |      |       |   |   |      |     |                |      |                |                |      |   |      |    |   |   |   |      |   |   |   |
|------|------|----|------|------|------|---|------|---|---|---|----------------|---|---|------|---|------|-------|---|---|------|-----|----------------|------|----------------|----------------|------|---|------|----|---|---|---|------|---|---|---|
| cox1 | cox2 | KD | atp8 | atp6 | cox3 | G | nad3 | A | R | N | S <sub>1</sub> | E | F | nad5 | H | nad4 | nad4L | T | P | nad6 | cob | S <sub>1</sub> | nad1 | L <sub>1</sub> | L <sub>2</sub> | rrnL | V | rrnS | CR | I | Q | M | nad2 | W | C | Y |
|------|------|----|------|------|------|---|------|---|---|---|----------------|---|---|------|---|------|-------|---|---|------|-----|----------------|------|----------------|----------------|------|---|------|----|---|---|---|------|---|---|---|

**Supplementary Fig. 10. The organization of the mitochondrial genome of *Ixodes scapularis* (a), and comparison of mitochondrial gene arrangement between *I. scapularis* and other ticks and arthropods (b). (a) Genes are shown as boxes and were drawn approximately to scale. Arrows indicate the orientation of transcription.**

Protein-coding and rRNA genes are abbreviated as *atp6* and *atp8* (for ATP synthase subunits 6 and 8), *cox1-3* (for cytochrome c oxidase subunits 1-3), *cob* (for cytochrome b), *nad1-6* and *4L* (for NADH dehydrogenase subunits 1-6 and 4L), and *rrnL* and *rrnS* (for large and small rRNA subunits). tRNA genes are shown with the single-letter abbreviations of their corresponding amino acids. The two tRNA genes for leucine are *L*<sub>1</sub> (anti-codon sequence UAG) and *L*<sub>2</sub>(UAA), and those for serine are *S*<sub>1</sub>(UCU) and *S*<sub>2</sub>(UGA). *CR* is the abbreviation for the putative control region. **(b)** The circular mitochondrial genomes are linearized at the 5' end of *cox1* (for the purpose of illustration). Genes and putative control regions (*CR*) are shown as boxes but were not drawn to scale. Genes are transcribed from left to right except those underlined, which are transcribed from right to left. Putative control regions are highlighted in black. Dark, grey, shaded-boxes indicate genes that changed position relative to the putative ancestor of arthropods. Pale, grey, shaded-boxes indicate genes that changed both position and the orientation-of-transcription, relative to the putative ancestor of arthropods.

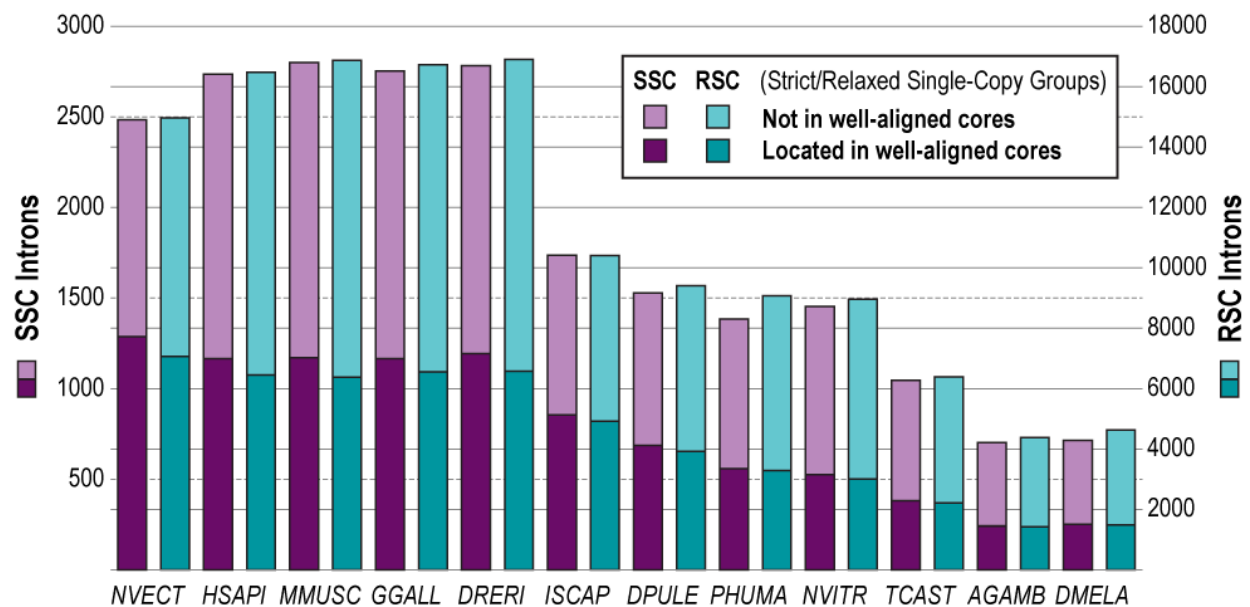

**Supplementary Fig. 11. Introns in single-copy orthologs across 12 species.** Introns were mapped on to the protein sequence alignments of 524 Strict Single-Copy (SSC) orthologs and 1,529 Relaxed Single-Copy (RSC) orthologs, allowing for small splice site changes, and conserved regions with an intron in at least one species were identified by requiring >30% amino acid identity in the aligned blocks flanking the intron position. Between 32% and 52% of introns in each species are located in well-aligned core regions of the ortholog alignments and therefore may be compared across the 12 species, and examining SSC or RSC sets does not affect the proportions of informative introns. Abbreviations: *NVECT*, *Nematostella vectensis*; *HSAPI*, *Homo sapiens*; *MMUSC*, *Mus musculus*; *GGALL*, *Gallus gallus*; *DRERI*, *Danio rerio*; *ISCAP*, *Ixodes scapularis*; *DPULE*, *Daphnia pulex*; *PHUMA*, *Pediculus humanus*; *NVITR*, *Nasonia vitripennis*; *TCAST*, *Tribolium castaneum*; *AGAMB*, *Anopheles gambiae*; *DMELA*, *Drosophila melanogaster*.

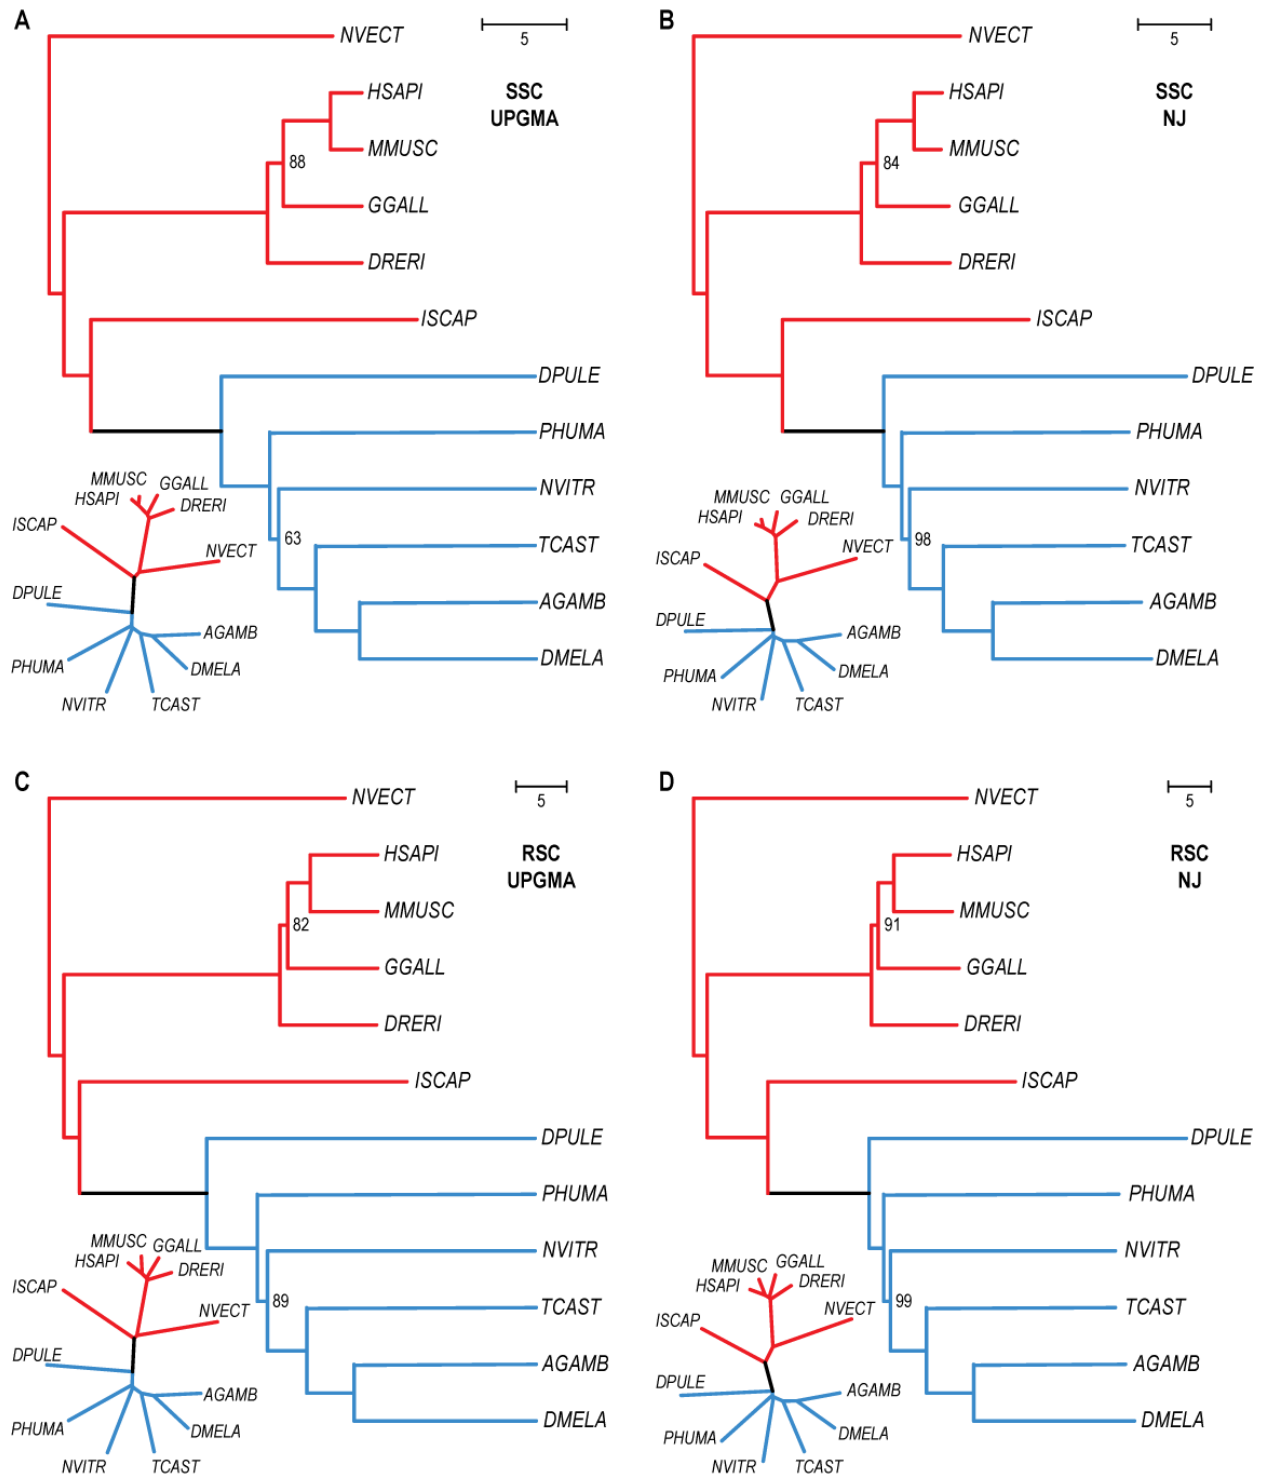

**Supplementary Fig. 12. 12-species phylogeny based on the conservation of intron positions.** Euclidean distance matrices from presence/absence matrices for 4,621 Strict Single-Copy (SSC, a & b) and 13,459 Relaxed Single-Copy (RSC, c & d) ortholog intron positions were employed to construct phylogenetic trees using Unweighted Pair Group Method with Arithmetic Mean (UPGMA, a & c) and Neighbor Joining (NJ, b & d) algorithms. *I. scapularis* (ISCAP) consistently shows greater similarity to the outgroup

species (red), human, mouse, chicken, zebrafish and sea anemone, than to the pancrustaceans (blue). Bootstrap values are indicated for the two nodes on each tree with less than 100% support: the alternative topologies cluster *PHUMA* and *NVITR* together and/or swap the positions of *DRERI* and *GGALL*. Unrooted radial trees are presented at the lower left of each panel. Abbreviations: *NVECT*, *Nematostella vectensis*; *HSAPI*, *Homo sapiens*; *MMUSC*, *Mus musculus*; *GGALL*, *Gallus gallus*; *DRERI*, *Danio rerio*; *ISCAP*, *Ixodes scapularis*; *DPULE*, *Daphnia pulex*; *PHUMA*, *Pediculus humanus*; *NVITR*, *Nasonia vitripennis*; *TCAST*, *Tribolium castaneum*; *AGAMB*, *Anopheles gambiae*; *DMELA*, *Drosophila melanogaster*.

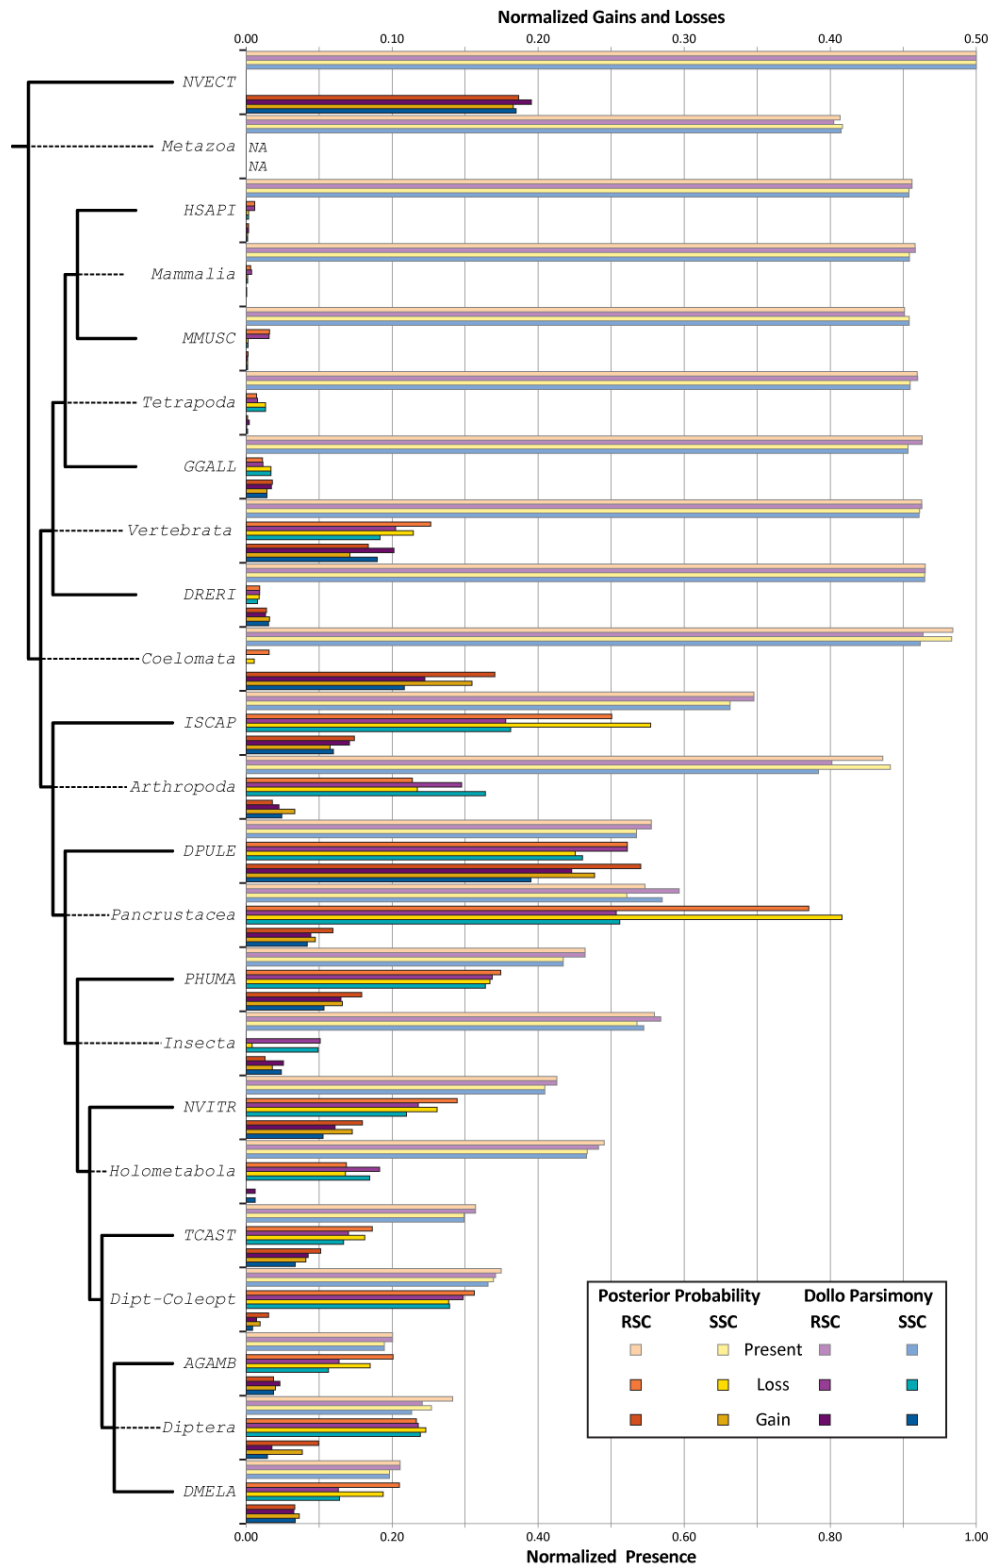

**Supplementary Fig. 13. Intron gain/loss estimates across the 12-species phylogeny.** Analysis of intron gain and loss across the 12-species phylogeny for the Strict Single-Copy (SSC) and Relaxed Single-Copy (RSC) sets of orthologs using Dollo Parsimony (DP) and Posterior Probability (PP) methods implemented in the MALIN

suite for maximum likelihood analysis of intron evolution in eukaryotes<sup>33</sup>. Data are normalized by the maximum number of introns (always *NVECT*) in order to compare the estimates from different sets using different methods. Normalization: Gained, Lost, or Present Introns / Maximum number of Introns. NB: the scale for the normalized gain and loss estimates (0.0-0.5) is double that of the normalized presence data (0.0-1.0). Corresponding numbers are presented in Supplementary Table 9. Abbreviations: *NVECT*, *Nematostella vectensis*; *HSAPI*, *Homo sapiens*; *MMUSC*, *Mus musculus*; *GGALL*, *Gallus gallus*; *DRERI*, *Danio rerio*; *ISCAP*, *Ixodes scapularis*; *DPULE*, *Daphnia pulex*; *PHUMA*, *Pediculus humanus*; *NVITR*, *Nasonia vitripennis*; *TCAST*, *Tribolium castaneum*; *AGAMB*, *Anopheles gambiae*; *DMELA*, *Drosophila melanogaster*.

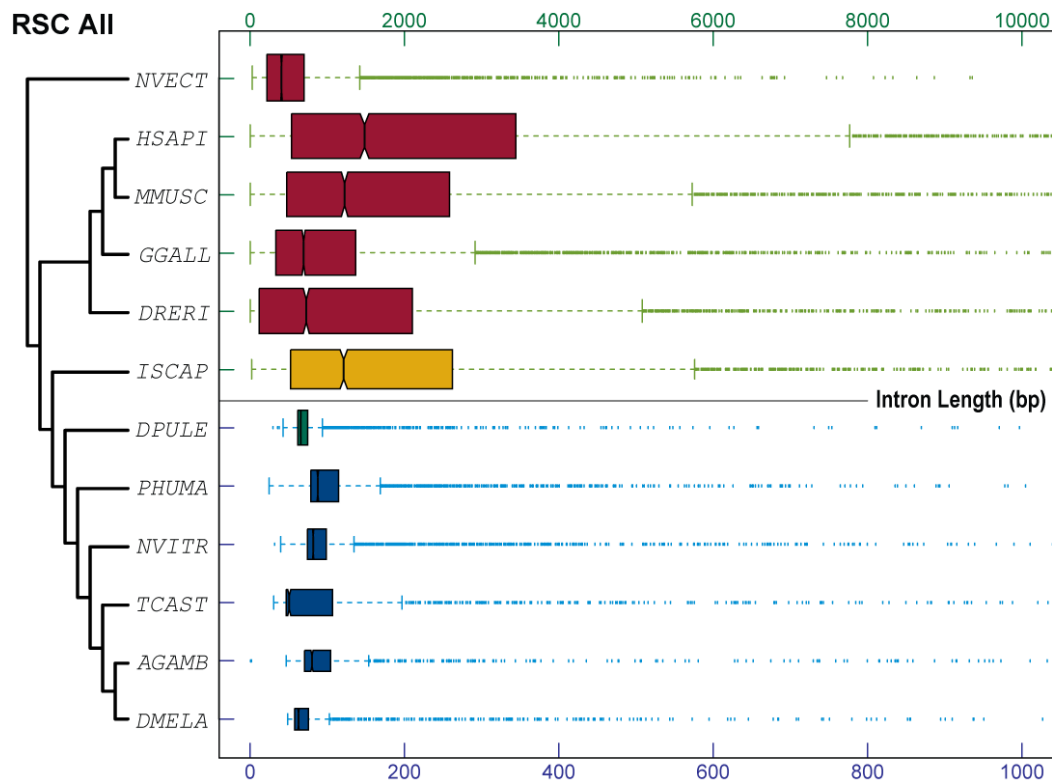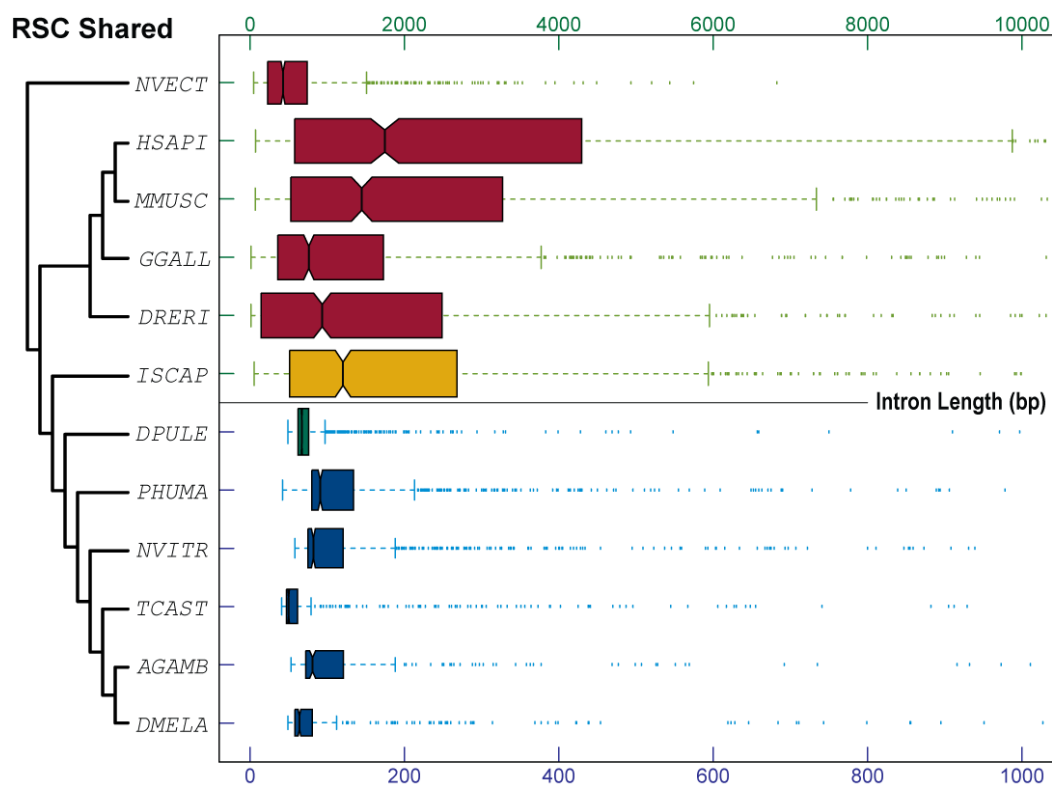

**Supplementary Fig. 14. Intron length distributions across 12 species.** The length distributions of informative introns for the Relaxed Single-Copy (RSC) orthology sets are

plotted: RSC All, all informative introns; RSC Shared, informative introns found in *ISCAP* and *DPULE* and at least one non-arthropod and at least one insect. Boxes indicate the median, 1<sup>st</sup> and 3<sup>rd</sup> quartiles, and whiskers show up to 1.5 times the interquartile range, box heights are proportional to the number of introns. *I. scapularis* (*ISCAP*) introns are most similar to those of *MMUSC* and other vertebrates, and more than an order of magnitude longer than pancrustacean introns. *NVECT*, *HSAPI*, *MMUSC*, *GGALL*, *DRERI*, and *ISCAP* scale to 10,000 bp (green axis) while the pancrustaceans scale to 1,000 bp (blue axis). The numbers, along with Wilcoxon test results, are presented in Supplementary Table 10. Abbreviations: *NVECT*, *Nematostella vectensis*; *HSAPI*, *Homo sapiens*; *MMUSC*, *Mus musculus*; *GGALL*, *Gallus gallus*; *DRERI*, *Danio rerio*; *ISCAP*, *Ixodes scapularis*; *DPULE*, *Daphnia pulex*; *PHUMA*, *Pediculus humanus*; *NVITR*, *Nasonia vitripennis*; *TCAST*, *Tribolium castaneum*; *AGAMB*, *Anopheles gambiae*; *DMELA*, *Drosophila melanogaster*.

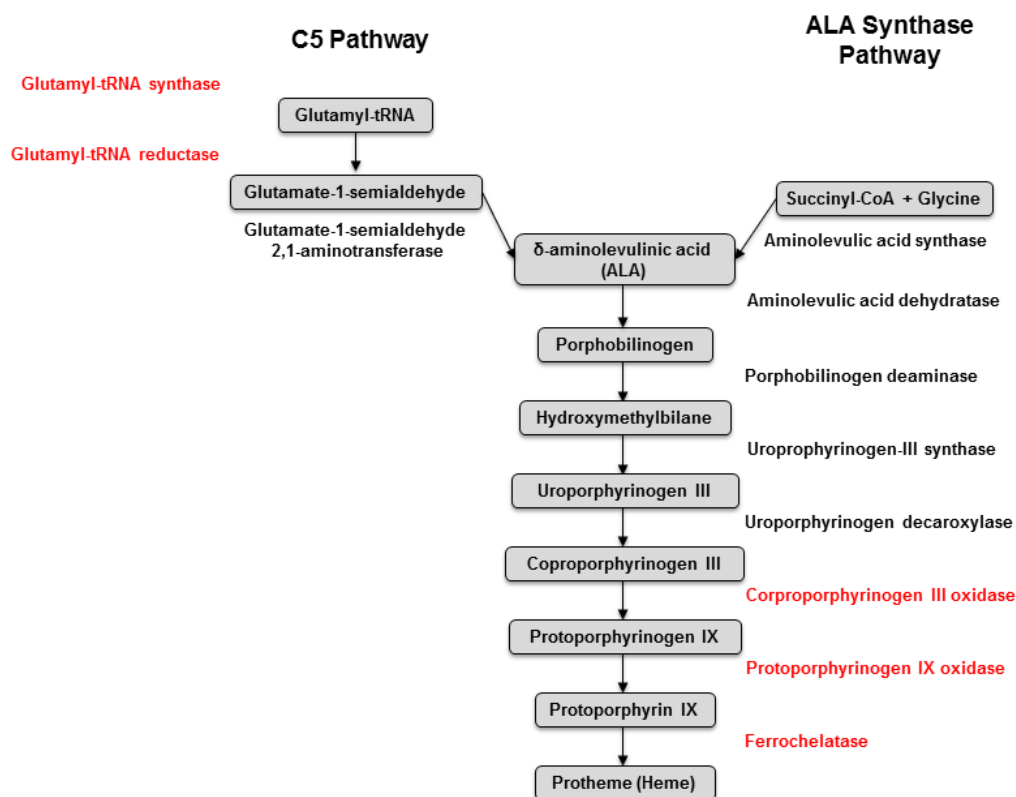

**Supplementary Fig. 15. Heme synthesis pathways and heme synthesis genes identified in the *Ixodes scapularis* genome.** Candidate heme synthesis genes identified in the *I. scapularis* genome are shown in red. The VectorBase accession numbers for each of the putative *I. scapularis* heme synthesis genes are listed in Supplementary Table 20.

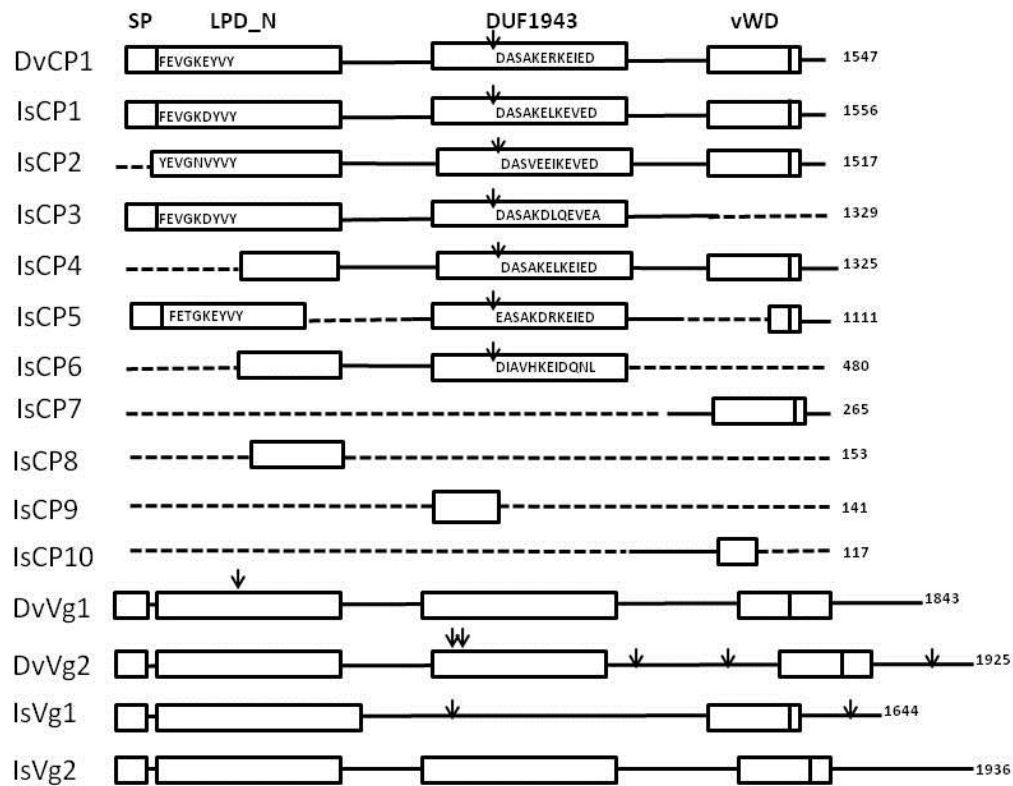

**Supplementary Fig. 16. Schematic representation of putative CPs and Vgs detected in *Ixodes scapularis* genome compared to the confirmed counterparts from *Dermacentor variabilis*.** DUF1943: a domain of unknown function, LPD\_N: lipid binding domain, SP: signal peptide, vWD: von Willebrand type D domain. Arrows represent the RXXR location while vertical solid lines represent the GL/ICG domain location. Amino acid sequence shown represents the N-terminal sequence of the 2 CP subunits starting directly downstream of the signal peptide and the RXXR cleavage sites. Dash lines represent missing sequences. DvCP1 (ABD83654), DvVg1 (AAW78577), DvVg2 (ABW82681), IsCP1 (ISCW021709), IsCP2 (ISCW014675), IsCP3 (ISCW021710), IsCP4 (ISCW012424), IsCP5 (ISCW012423), IsCP6 (ISCW021704), IsCP7 (ISCW021707), IsCP8 (ISCW021706), IsCP9 (ISCW021705), IsCP10 (ISCW024299), IsVg1 (ISCW013727), IsVg2 (ISCW021228).

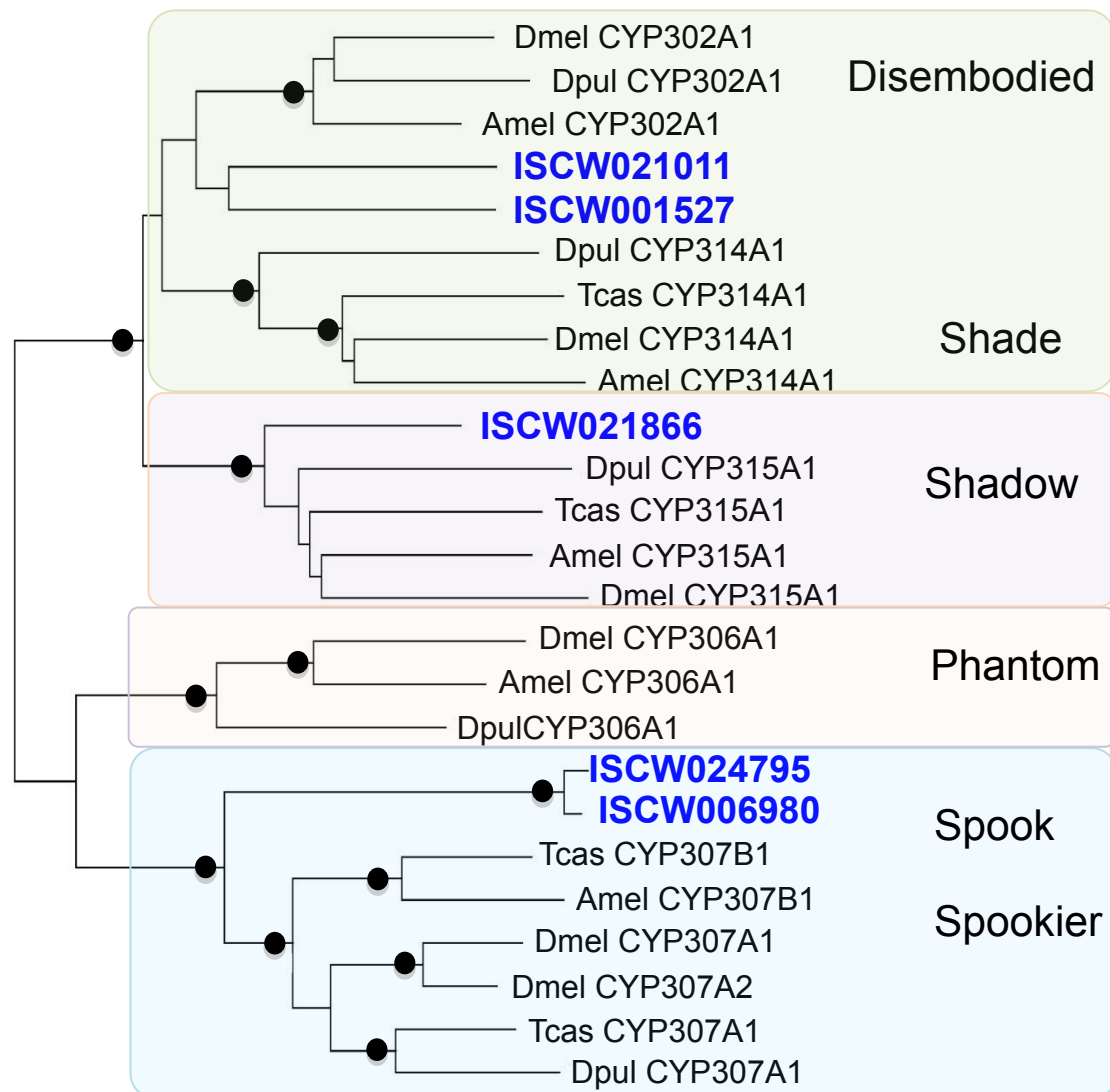

**Supplementary Fig. 17. Cytochrome P450 genes orthologous to the Halloween genes that encode steroidogenic cytochrome P450s for hydroxylations of 20-hydroxylecdysone.** Blue font indicates the VectorBase accession number for the corresponding predicted protein sequences identified in the *I. scapularis* genome. Solid circles at branch points indicate bootstrapping support with higher than 70% in 1000 replication of the neighbor-joining tree. Insect genes in the orthologous group are from *Tribolium castaneum* (Tcas), *Drosophila melanogaster* (Dmel), *Apis mellifera* (Amel), and *Daphnia pulex* (Dpul).

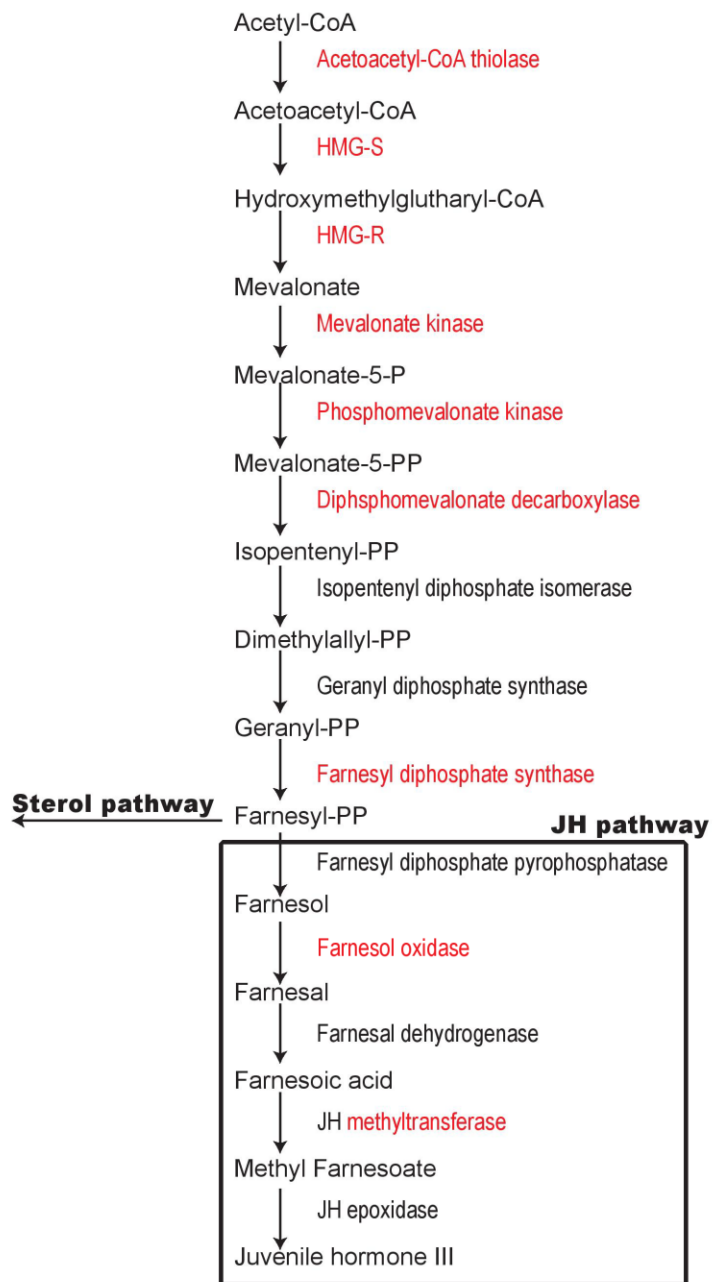

HMG-S, Hydroxymethylglutaryl-CoA synthase  
 HMG-R, Hydroxymethylglutaryl-CoA reductase  
 JH, Juvenile Hormone

**Supplementary Fig. 18. The mevalonate/farnesoic acid pathway in *Ixodes scapularis*.** Genes encoding enzymes highlighted in red were identified in the *I. scapularis* genome. There is no evidence that putative *I. scapularis* methyl transferases are involved in the synthesis of methyl farnesoate. There is no direct evidence for the production of methyl farnesoate or juvenile hormone (JH) in ticks, and no evidence that these compounds, when introduced exogenously, affect tick development and reproduction.

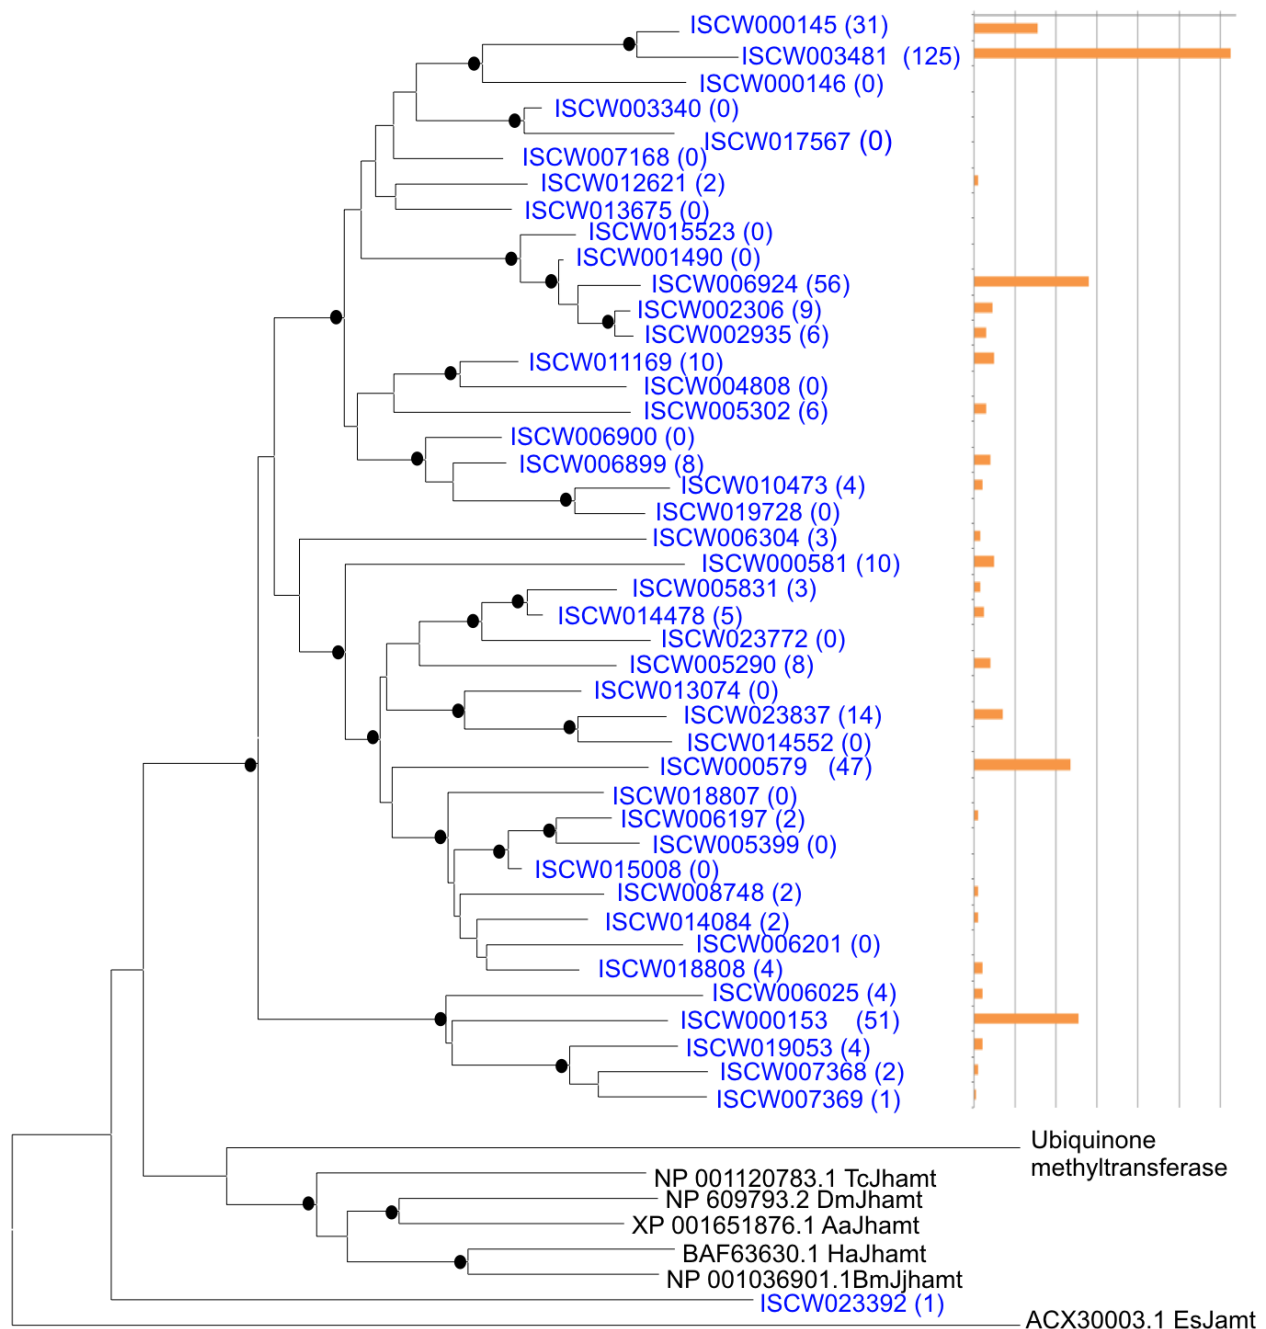

**Supplementary Fig. 19. Recent gene expansion for farnesoic acid methyltransferase/methyl transferase in the *Ixodes scapularis* genome showing 44 copies.** Blue fonts are for the sequences found in the *I. scapularis* with the frequency of the EST for each predicted gene in the parenthesis and bar graph on the right column. Solid circles at the branching points are for bootstrapping supports with higher than 70% in 1000 replications of the neighbor-joining tree. Insect genes in the orthologous group are from *Tribolium castaneum* (Tc), *Drosophila melanogaster* (Dm), *Aedes aegypti* (Aa), *Helicoverpa armigera* (Ha), *Bombyx mori* (Bm), and *Eriocheir*

*sinensis* (Es). The VectorBase accession for the predicted protein and corresponding base-pair range of each gene on the *I. scapularis* scaffolds are; ISCW000145, DS624614 (1302..5354); ISCW000146, DS624614 (9631..10170); ISCW000153, DS763941 (182505..186413); ISCW000579, DS947122, (6316..11994); ISCW000581, DS629339, (179176..194485); ISCW001490, DS706167, (10281..31698); ISCW002306, DS932067, (897..5521); ISCW002935, DS768854, (735905..747194); ISCW003340, DS779352, (21734..27575); ISCW003481, DS793841, (18669..25357); ISCW004808, DS674354, (11645..16314); ISCW005290, DS970697, (84452..85469); ISCW005302, DS629339, (117659..129013); ISCW005399, DS777710, (6901..10266); ISCW005831, DS887498, (197112..207263); ISCW006025, DS954326, (27895..30828); ISCW006197, DS748781, (26926..29875); ISCW006201, DS851612, (37761..41988); ISCW006304, DS930042, (10717..12534); ISCW006899, DS690206, (9184..9657); ISCW006900, DS741077, (829..13451); ISCW006924, DS872849, (1313..1855); ISCW007168, DS789606, (16620..25257); ISCW007263, DS768854, (719374..727853); ISCW007368, DS779352, (129774..133039); ISCW007369, DS967436, (35953..41027); ISCW008032, DS652581, (3712..4362); ISCW008748, DS748497, (1567..25229); ISCW010473, DS615618, (20473..34490); ISCW011169, DS751725, (281571..300251); ISCW012621, DS638221, (12578..13060); ISCW013074, DS781271, (1344..5551); ISCW013675, DS781271, (13943..14422); ISCW014084, DS751647, (5328..26009); ISCW014478, DS880071, (28950..39043); ISCW014552, DS977870, (16944..20120); ISCW015008, DS644550, (414041..414787); ISCW015523, DS928935, (5815..7014); ISCW016046, DS972004, (8558..19224); ISCW017567, DS746255, (64199..77852); ISCW018807, DS661924, (43567..48537); ISCW018808, DS735014, (408..7677); ISCW019053, DS710865, (6303..9071); ISCW019728, DS970447, (16214..18413); ISCW023392, DS802122, (55507..58567); ISCW023772, DS938188, (37911..40070); ISCW023837, DS770764, (14572..19070).

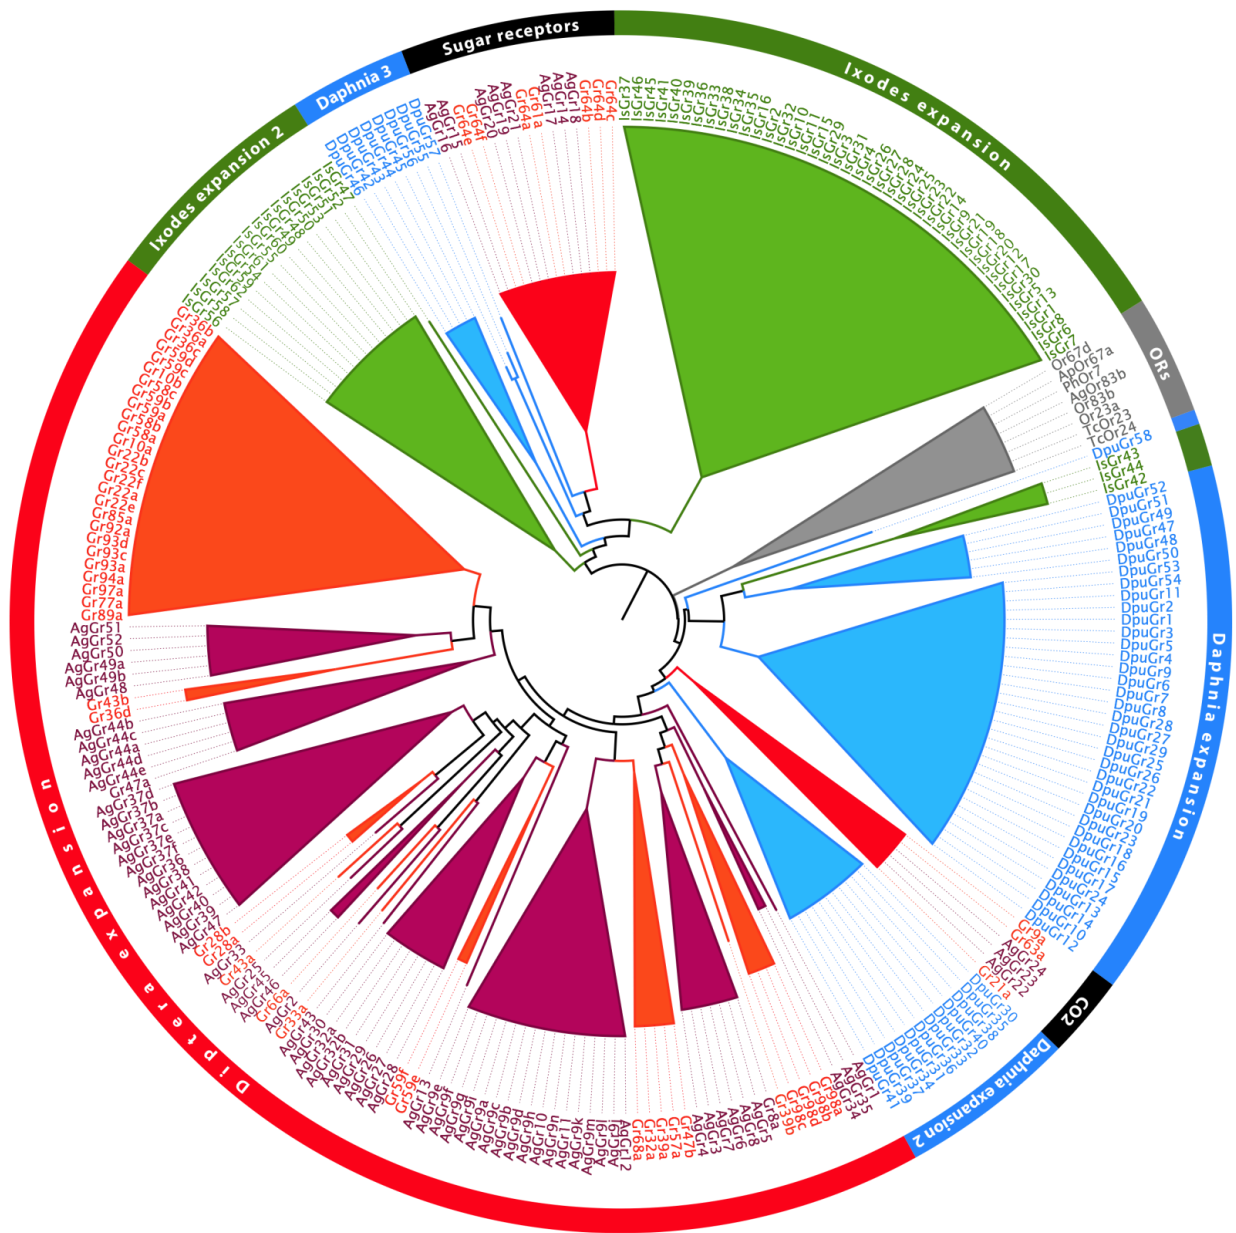

**Supplementary Fig. 20. Phylogenetic relationships among gustatory (GRs) and olfactory (ORs) receptors.** Protein sequences from *Ixodes scapularis* (green), *Daphnia pulex* (blue), *Drosophila melanogaster* (orange) and *Anopheles gambiae* (maroon). Sugar and CO<sub>2</sub> receptors are highlighted in black. The insect olfactory receptors (grey) include protein sequences of several species: *D. melanogaster* (Or), *Tribolium castaneum* (Tc), *Anopheles gambiae* (Ag), *Pediculus humanus* (Ph), and *Acyrthosiphon pisum* (Ap).

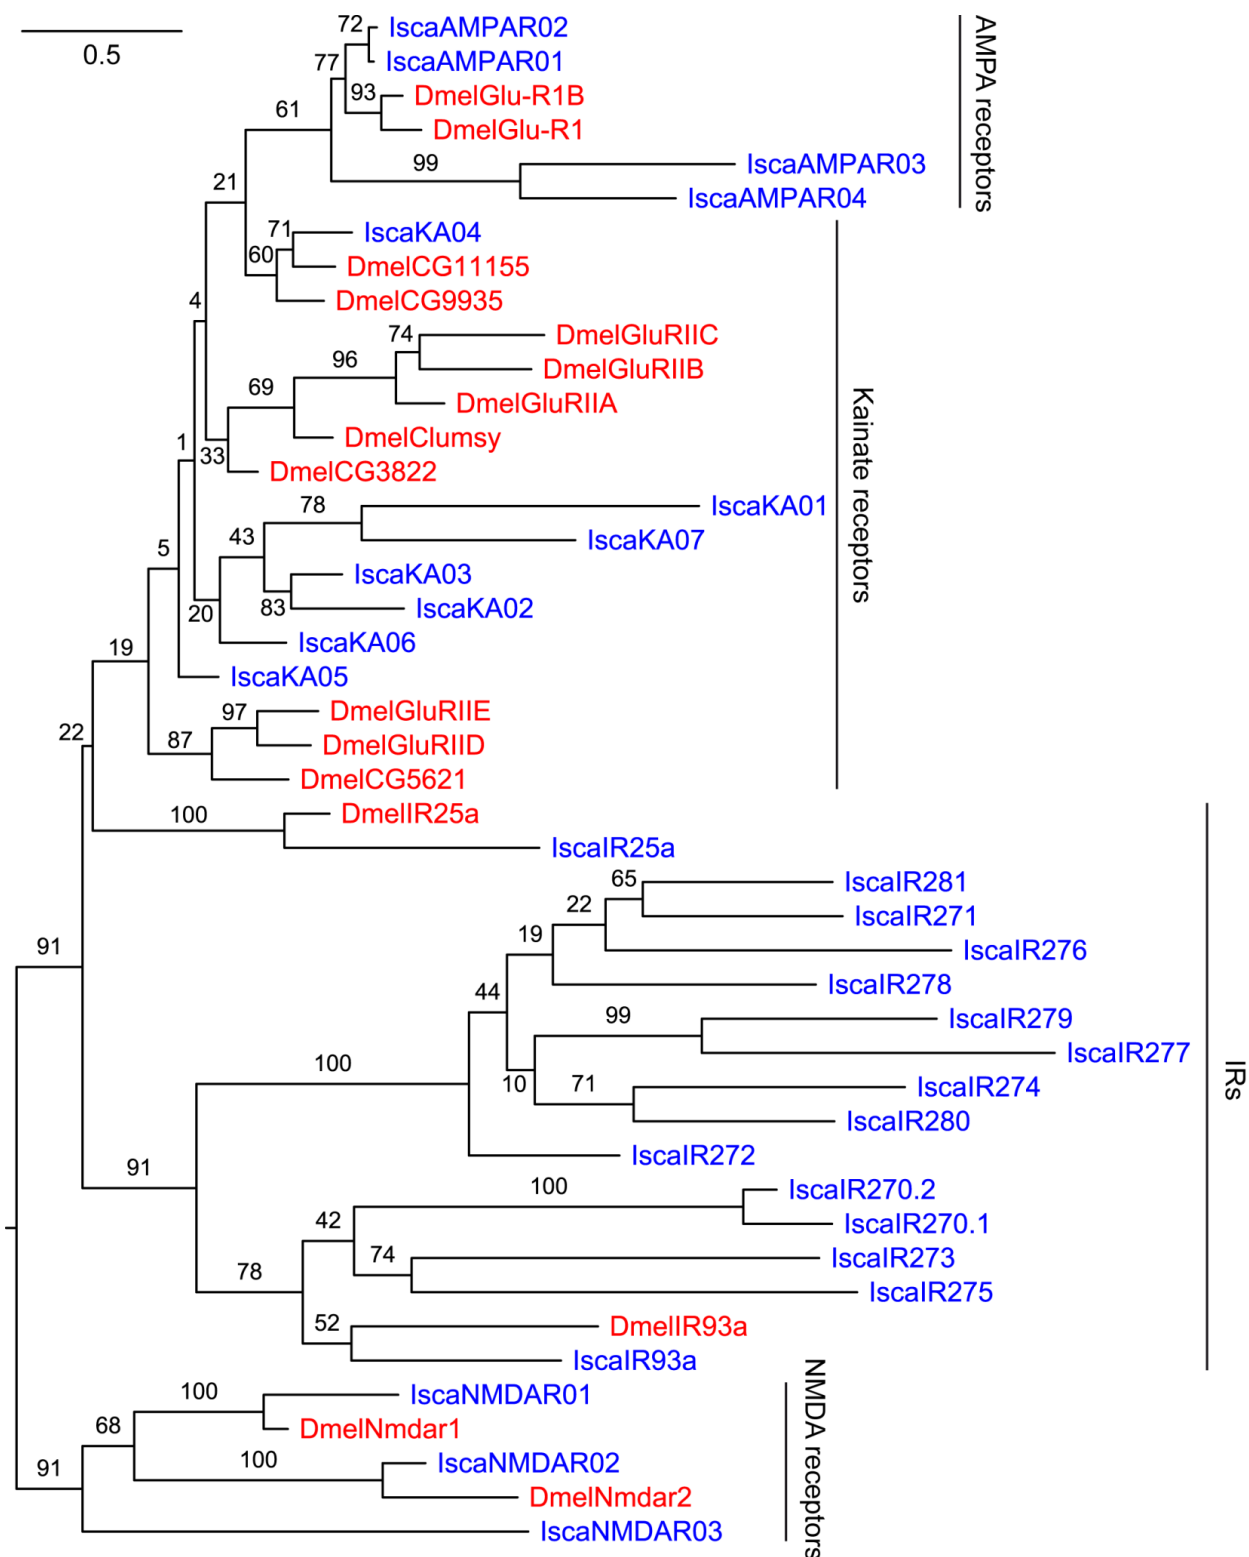

**Supplementary Fig. 21. Phylogenetic tree of the *Ixodes scapularis* Ionotropic Receptor (IR) and ionotropic glutamate receptor protein sequences (blue), alongside their *Drosophila melanogaster* (red) orthologs.** Different receptor subfamilies of receptors are highlighted with black vertical lines. Protein sequences

were aligned with MUSCLE, and the tree was built with RAxML under the WAG model of substitution with 1000 bootstrap replicates. Bootstrap values for each branch are indicated on the tree. The scale bar represents the number of substitutions per site.

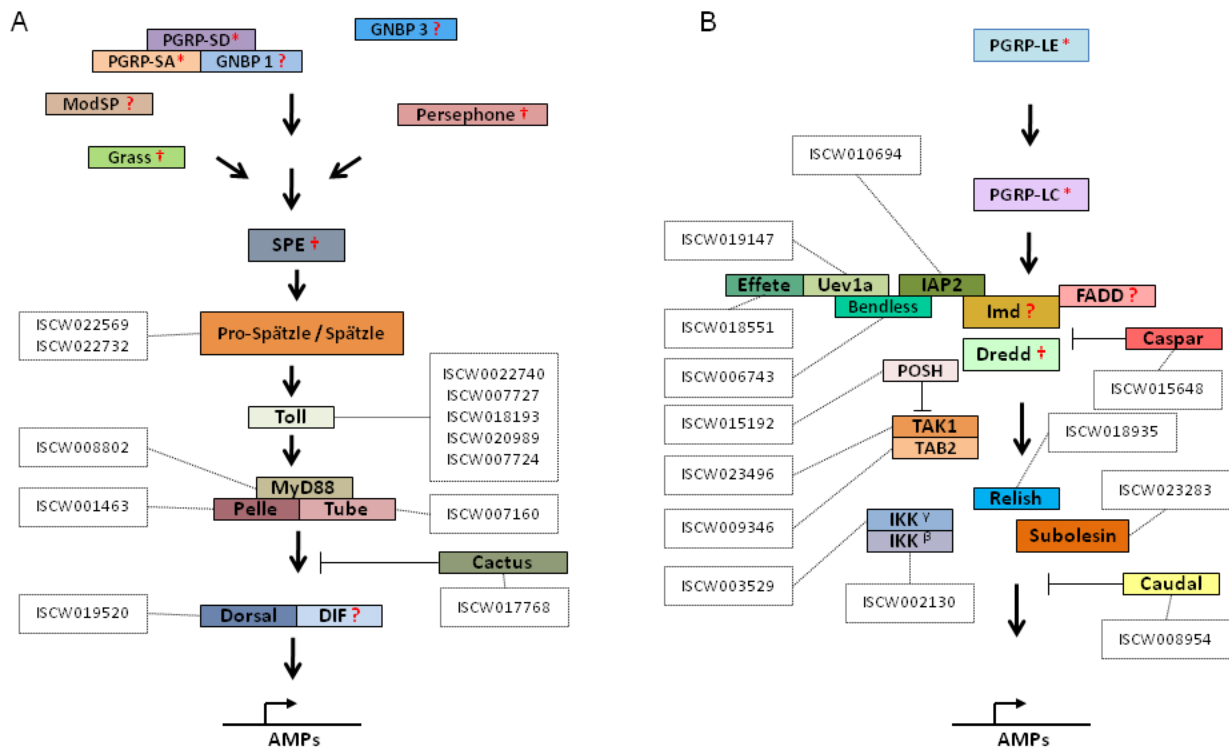

**Supplementary Fig. 22. *In silico* analysis of the (a) Toll and (b) IMD pathways in the *Ixodes scapularis* genome.** Gene identifiers were obtained from VectorBase ([www.vectorbase.org](http://www.vectorbase.org)) and compared to the Toll and IMD pathways in *Drosophila melanogaster*, *Anopheles gambiae* and *Aedes aegypti* mosquitoes. Gene identifiers from *I. scapularis* are boxed. Red question marks indicate genes that were not identified in the *I. scapularis* genome. Dagger marks represent sequences for which putative *I. scapularis* homologues were uncovered but cannot be categorized as precise orthologs. Asterisks indicate sequences for which putative *I. scapularis* homologues were uncovered but cannot be categorized at the isoform level.

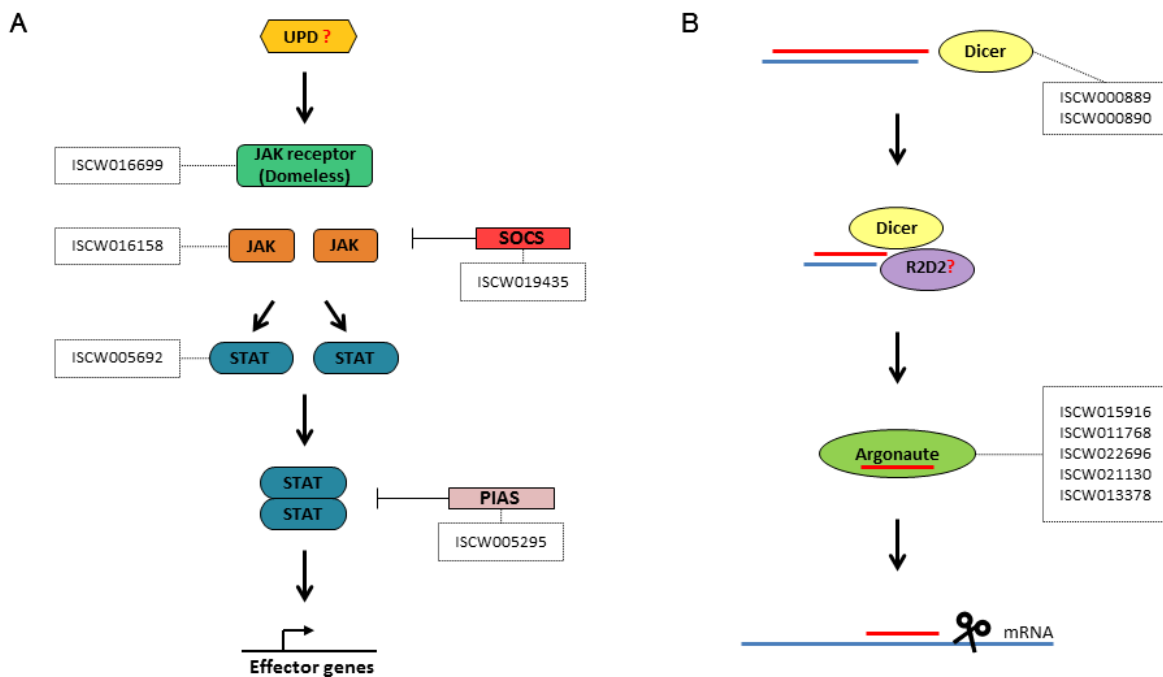

**Supplementary Fig. 23. *In silico* analysis of the (a) JAK/STAT and (b) anti-viral RNAi pathways in the *I. scapularis* genome.** Gene identifiers were obtained from VectorBase ([www.vectorbase.org](http://www.vectorbase.org)) and compared to the JAK/STAT and RNAi pathways in *Drosophila melanogaster*, *Anopheles gambiae* and *Aedes aegypti* mosquitoes. Gene identifiers from *I. scapularis* are boxed. Red question marks indicate genes that were not identified in the *I. scapularis* genome.

**Down in Early vs. Late  
infections (63 proteins)**

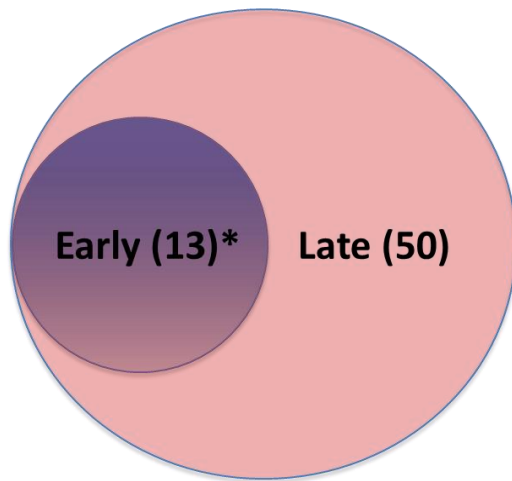

**Up in Early vs. Late  
infections (39 proteins)**

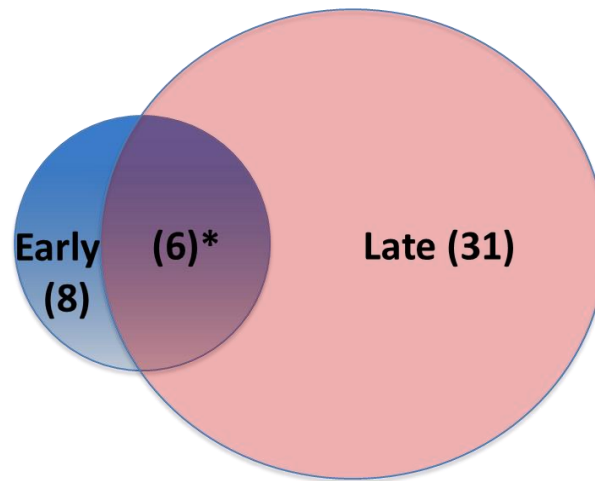

**Supplementary Fig. 24. Protein expression in early and late *Anaplasma phagocytophilum* infection of *Ixodes scapularis* ISE6 cells.** The Venn diagram shows the number of proteins (in parenthesis) that are over- or under- represented in early versus late infection (\*indicates significant overlaps;  $p < 10^{-6}$ ).

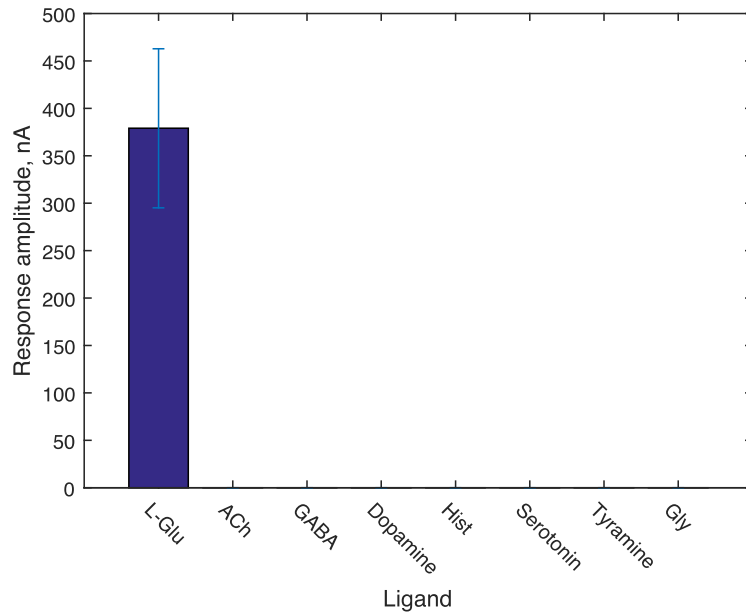

**Supplemental Fig. 25. The *Ixodes scapularis* ligand-gated anion channel (KR107244) expressed in *Xenopus laevis* oocytes was exposed in turn to a series of neurotransmitter molecules that have been shown to activate invertebrate ligand-gated anion channels.** The transmitters were tested separately at  $10^{-4}$  M on oocytes (n=29, 7, 7, 6, 7, 6, 6 respectively). Only L-glutamate yielded a current. All others tested (acetylcholine (ACh),  $\gamma$ -amino butyric acid (GABA), dopamine, histamine, serotonin, tyramine) were without effect. Glycine, which like GABA activates ligand gated anion channels in mammalian brain was also without effect (n=7). This selectivity for L-glutamate led to the nomenclature IscaGluCl1 for subunit KR107244.

## Supplementary Tables

**Supplementary Table 1. Cumulative effect of *Ixodes scapularis* IscaW1 assembly intervention.**

| Assembly Settings               | A             | B              | C             | D             |
|---------------------------------|---------------|----------------|---------------|---------------|
| Input reads                     | ~12,000,000   | 16,632,252     | 16,875,697    | 16,875,697    |
| Software version                | CA 3.1        | CA 4.0         | CA 4.0        | CA 4.0        |
| Partial overlaps for trim       |               |                |               |               |
| + K-mer seed length             | 22            | 16             | 16            | 28            |
| + seed frequency                | default       | 50             | 50            | 1000          |
| threshold                       |               |                |               |               |
| + error threshold               | 6%            | 6%             | 6%            | 6%            |
| + overlap length threshold      | 40            | 40             | 40            | 300           |
| + detect and trim chimer        | yes           | yes            | no            | no            |
| Full overlaps for unitigs       |               |                |               |               |
| + K-mer seed length             | 22            | 22             | 14            | 14            |
| + seed frequency                | default       | default        | 8000          | 8000          |
| threshold                       |               |                |               |               |
| + initial error threshold       | 6%            | 6%             | 20%           | 20%           |
| + basecall correction           | yes           | yes            | no            | no            |
| + final error threshold         | 3%            | 3%             | 13%           | 13%           |
| Contig building                 |               |                |               |               |
| + assumed genome size           | default       | default        | default       | 1 Gbp         |
| + max error, unitig join        | 6%            | 6%             | 20%           | 20%           |
| + max error, gap close          | 6%            | 6%             | 12%           | 20%           |
| Assembly Results                | A             | B              | C             | D             |
| Contigs                         |               |                |               |               |
| + number of contigs             | 600,000       | 843,837        | 474,816       | 570,640       |
| + max bases per contig          | 30,000        | 76,172         | 83,974        | 117,687       |
| + contig N <sub>50</sub> bases  | 1,900         | 1,943          | 3,116         | 2,942         |
| + mean bases per contig         | n/a           | 1,997          | 2,554         | 2,433         |
| + mean coverage                 | 2.0           | 2.3            | 3.4           | 3.5           |
| + reads incorporated            | 30%           | 35%            | 37%           | 44%           |
| + total contig bases            | n/a           | 1,684,909,012  | 1,212,614,075 | 1,388,475,690 |
| Scaffolds                       |               |                |               |               |
| + number of scaffolds           | 500,000       | 680,216        | 327, 135      | 369, 495      |
| + max span per scaffold         | 250,000       | 645,492        | 3,360,897     | 3,699,225     |
| + scaffold N <sub>50</sub> span | 2,200         | 2,535          | 22,441        | 51,551        |
| + mean span per scaffold        | n/a           | 3,209          | 4,606         | 4,774         |
| + total scaffold span           | 2,150,000,000 | 2,182, 541,146 | 1,506,734,076 | 1,763,920,678 |

Four assemblies of *Ixodes scapularis*. Columns A through D summarize four runs of the Celera Assembler software. **Assembly Settings.** Partial overlaps are local alignments between read pairs. Celera Assembler trimmed terminal basecalls of reads based on drop off patterns in the partial overlap collection. Parameter changes during assemblies B and C were designed to enlarge the collection. Assemblies C and D used the union of two collections. Full overlaps are pair-wise alignments that fully cover at least two of the four read ends; they capture dovetail and containment relations. Parameter changes during assemblies C and D were designed to enlarge the collection. Parameter changes during assemblies C and D were designed to reduce sensitivity to high-coverage unitigs (genome size), consensus differences in multiple sequence alignments (unitig join), and basecall differences between trimmed sequences at contig ends (gap close). **Assembly Results.** In the Celera Assembler output, contigs and scaffolds are redundant organizations of the same consensus sequence. Every contig belongs to one scaffold and every scaffold spans one or more contigs. Contigs have positive read coverage at every base. Scaffolds span gaps between contigs where gap size is derived from spanning

mate constraints. Scaffolds also span repetitive regions where a unitig consensus is placed as surrogate for read coverage. Contig N50 is the number of bases of the smallest contig in the minimal set that covers 50% of the assembly's total contig bases. Scaffold N50 is the span smallest scaffold in the minimal set that covers 50% of the assembly's total scaffold span. Mean coverage is the sum of bases after trimming in reads incorporated into contigs divided by total contig bases.

**Supplementary Table 2. Size and distribution of DNA on *Ixodes scapularis* IscaW1 scaffolds.**

| <b>Scaffold Length</b> | <b>No. Scaffolds</b> | <b>Total No. Bases<sup>a</sup></b> | <b>% Genome in Scaffolds</b> |
|------------------------|----------------------|------------------------------------|------------------------------|
| 1Mb – 4 Mb             | 51                   | 84,551,570                         | 3.6%                         |
| 100 kb – 999 kb        | 2,914                | 743,132,618                        | 32.1%                        |
| 10 kb – 99 kb          | 14,397               | 390,238,447                        | 16.8%                        |
| < 10 kb                | 352,130              | 545,998,043                        | 23.6%                        |
| Total                  | 369,492              | 1,763,920,678                      | 76%                          |

Calculations are based on the genome size estimate of 2.31 Gb

<sup>a</sup>Based on total scaffold span for column “D” in Supplementary Table 1.

**Supplementary Table 3. *Ixodes scapularis* genome annotation IscaW1 statistics**

| <b>Transcription units - genes</b>   | <i>Ixodes scapularis</i> | <i>Aedes aegypti</i><br>(AaegL1.3) | <i>Anopheles gambiae</i><br>(AgamP3.7) | <i>Drosophila melanogaster</i><br>(FB2012_04) | <i>Daphnia pulex</i><br>(Ensembl Genome 71) | <i>Tetranychus urticae</i><br>(Ensembl Genomes 72) |
|--------------------------------------|--------------------------|------------------------------------|----------------------------------------|-----------------------------------------------|---------------------------------------------|----------------------------------------------------|
| Total number of protein coding genes | 20,486                   | 15,998                             | 12,810                                 | 13,937                                        | 30,894                                      | 18,224                                             |
| Mean gene length (bp)                | 10,589                   | 15,456                             | 6,383                                  | 6,492                                         | 2,116                                       | 2,733                                              |
| Median gene length (bp)              | 4,259                    | 5,895                              | 2,076                                  | 2,088                                         | 1,279                                       | 1,549                                              |
| Shortest gene (bp)                   | 95                       | 105                                | 111                                    | 117                                           | 150                                         | 99                                                 |
| Longest gene (bp)                    | 242,297                  | 428,674                            | 365,622                                | 395,988                                       | 114,502                                     | 104,962                                            |
| <b>Exons</b>                         |                          |                                    |                                        |                                               |                                             |                                                    |
| Total number of exons                | 89,663                   | 64,752                             | 56,398                                 | 74,024                                        | 144,872                                     | 69,647                                             |
| Number of mono-exonic genes          | 5,707                    | 1,874                              | 1,187                                  | 2,170                                         | 5,149                                       | 2,213                                              |
| Max. no. exons/gene                  | 81                       | 41                                 | 67                                     | 82                                            | 83                                          | 55                                                 |
| Median exon length (bp)              | 219                      | 231                                | 232                                    | 246                                           | 154                                         | 179                                                |
| <b>Introns</b>                       |                          |                                    |                                        |                                               |                                             |                                                    |
| Total number of introns              | 69,163                   | 52,370                             | 51,024                                 | 133,158                                       | 113,998                                     | 16,041                                             |
| Percentage of genes with introns     | 72.10%                   | 88.3%                              | 90.8%                                  | 84.4%                                         | 83.3%                                       | 88%                                                |
| Mean intron length (bp)              | 2,284                    | 4,789                              | 1,566                                  | 1,568                                         | 285                                         | 456                                                |
| Median intron length (bp)            | 1, 599                   | 145                                | 96                                     | 103                                           | 76                                          | 96                                                 |
| Shortest intron (bp)                 | 15                       | 1                                  | 1                                      | 1                                             | 0 (!)                                       | 1                                                  |
| Longest intron (bp)                  | 54, 366                  | 329,294                            | 249,417                                | 141,627                                       | 48,487                                      | 59,291                                             |
| <b>Coding sequences (CDS)</b>        |                          |                                    |                                        |                                               |                                             |                                                    |
| Mean CDS length (bp)                 | 855                      | 1,363                              | 1,616                                  | 1,977                                         | 976                                         | 1,074                                              |
| Median CDS length (bp)               | 594                      | 1,053                              | 11,191                                 | 1,404                                         | 702                                         | 807                                                |
| Shortest CDS (bp)                    | 95                       | 81                                 | 78                                     | 20                                            | 150                                         | 63                                                 |
| Longest CDS (bp)                     | 15,248                   | 33,987                             | 47,535                                 | 68,850                                        | 23,331                                      | 54,762                                             |
| <b>RNAs</b>                          |                          |                                    |                                        |                                               |                                             |                                                    |
| Non coding RNAs                      | 4,439                    | 1,279                              | 612                                    | 474                                           | 3,567                                       | n/a                                                |
| tRNAs                                | 4,402                    | 962                                | 450                                    | 314                                           | 3,559                                       | n/a                                                |
| miRNAs                               | 51                       | 84                                 | 121                                    | n/a                                           | 7                                           | n/a                                                |
| rRNAs                                | 8                        | 233                                | 41                                     | 160                                           | 1                                           | n/a                                                |
| <b>Miscellaneous Statistics</b>      |                          |                                    |                                        |                                               |                                             |                                                    |
| Gene frequency (genes/kb)            | 1/70                     | 1/82                               | 1/22                                   | 1/12                                          | 1/6                                         | 1/5                                                |

|                                         |         |      |      |      |   |   |
|-----------------------------------------|---------|------|------|------|---|---|
| Percentage of coding region in genome   | 6%      | -    | -    | -    | - | - |
| Av. Intergenic region (bp) <sup>a</sup> | 80, 410 | -    | -    | -    | - | - |
| Av. Intergenic region (bp) <sup>b</sup> | 57, 141 | -    | -    | -    | - | - |
| Intergenic regions GC content           | 32%     | -    | -    | -    | - | - |
| Coding regions GC content               | 56%     | -    | -    | -    | - | - |
| Total GC content                        | NA      | 38.2 | 40.9 | 42.5 |   | - |

---

NA, not available

<sup>a</sup>ten longest scaffolds

<sup>b</sup>global

**Supplementary Table 4. Analysis of *Ixodes scapularis* Bacterial Artificial Chromosomes (BACs) showing assembly completeness and mapping to IscaW1 scaffolds.**

| BAC Name   | GenBank Accession | BAC Length (bp) | Sequencing Center | Assembly Status | IscaW1 Scaffold Hits <sup>a</sup> | GenBank IscaW1 Scaffold ID |
|------------|-------------------|-----------------|-------------------|-----------------|-----------------------------------|----------------------------|
| ISG1-05A01 | AC192414          | 117,688         | Broad             | 1 C             | 2                                 | DS776359                   |
|            |                   |                 |                   |                 |                                   | DS810098                   |
| ISG1-33A01 | AC192415          | 122,081         | Broad             | 2 OP            | 3                                 | DS818409                   |
|            |                   |                 |                   |                 |                                   | DS825617                   |
|            |                   |                 |                   |                 |                                   | DS768807                   |
| ISG1-36A01 | AC192416          | 106,082         | Broad             | 2 OP            | 1                                 | DS694416                   |
| ISG1-40A01 | AC192417          | 102,815         | Broad             | 3 UP            | 4                                 | DS840034                   |
|            |                   |                 |                   |                 |                                   | DS872355                   |
|            |                   |                 |                   |                 |                                   | DS892014                   |
|            |                   |                 |                   |                 |                                   | DS682990                   |
| ISG1-41A01 | AC192418          | 114,701         | Broad             | 3 UP            | 1                                 | DS907939                   |
| ISG1-43A01 | AC192419          | 113,880         | Broad             | 2 OP            | multiple                          | N/A                        |
| ISG1-45A01 | AC192420          | 146,997         | Broad             | 19 UP           | multiple                          | N/A                        |
| ISG1-49A01 | AC192421          | 137,442         | Broad             | 7 UP            | 2                                 | DS858616                   |
|            |                   |                 |                   |                 |                                   | DS746366                   |
| ISG1-51A01 | AC192422          | 135,954         | Broad             | 2 OP            | 1                                 | DS752087                   |
| ISG1-53A01 | AC192423          | 109,798         | Broad             | 2 OP            | multiple                          | N/A                        |
| ISG1-55A01 | AC192424          | 145,462         | Broad             | 5 UP            | 1                                 | DS732299                   |
| ISG1-60A01 | AC192425          | 145,957         | Broad             | 6 OP            | multiple                          | N/A                        |
| ISG1-64A01 | AC192426          | 117,608         | Broad             | 4 UP            | 1                                 | DS868627                   |
| ISG1-66A01 | AC192427          | 98,661          | Broad             | 1 C             | 1                                 | DS911446                   |
| ISG1-67A01 | AC192428          | 109,864         | Broad             | 3 OP            | multiple                          | N/A                        |
| ISG1-68A01 | AC192429          | 142,474         | Broad             | 3 UP            | multiple                          | N/A                        |
| ISG1-48A01 | AC192742          | 133,074         | Broad             | 1 C             | 1                                 | DS780529                   |
| ISG1-54A01 | AC192743          | 130,937         | Broad             | 8 UP            | multiple                          | N/A                        |
| ISG1-61A01 | AC192744          | 115,169         | Broad             | 2 OP            | multiple                          | N/A                        |
| ISG1-02A01 | AC200531          | 77,162          | Broad             | 1 C             | multiple                          | N/A                        |
| ISG1-01F14 | AC205630          | 95,257          | JCVI              | 1 C             | multiple                          | N/A                        |
| ISG1-01P02 | AC205631          | 108,728         | JCVI              | 2 OP            | multiple                          | N/A                        |
| ISG1-03K02 | AC205632          | 26,509          | JCVI              | 1 C             | multiple                          | N/A                        |
| ISG1-03P02 | AC205633          | 97,928          | JCVI              | 4 OP            | multiple                          | N/A                        |
| ISG1-06P02 | AC205634          | 112,417         | JCVI              | 1 C             | multiple                          | N/A                        |
| ISG1-11P02 | AC205635          | 104,824         | JCVI              | 1 C             | 1                                 | DS800715                   |
| ISG1-12P02 | AC205636          | 106,974         | JCVI              | 6 OP            | 4                                 | DS688082                   |
|            |                   |                 |                   |                 |                                   | DS708137                   |
|            |                   |                 |                   |                 |                                   | DS966567                   |
|            |                   |                 |                   |                 |                                   | DS826915                   |
| ISG1-14C07 | AC205637          | 132,125         | JCVI              | 3 OP            | multiple                          | N/A                        |
| ISG1-15P02 | AC205638          | 100,378         | JCVI              | 1 C             | multiple                          | N/A                        |
| ISG1-16P02 | AC205639          | 92,783          | JCVI              | 4 OP            | multiple                          | N/A                        |
| ISG1-22P02 | AC205640          | 109,965         | JCVI              | 4 OP            | multiple                          | N/A                        |
| ISG1-24P02 | AC205641          | 179,341         | JCVI              | 1 C             | multiple                          | N/A                        |
| ISG1-27P02 | AC205642          | 110,473         | JCVI              | 1 C             | 3                                 | DS859588                   |
|            |                   |                 |                   |                 |                                   | DS928213                   |
|            |                   |                 |                   |                 |                                   | DS859588                   |
| ISG1-31P02 | AC205643          | 128,247         | JCVI              | 1 C             | 1                                 | DS891538                   |
| ISG1-37P02 | AC205644          | 110,110         | JCVI              | 2 OP            | multiple                          | N/A                        |
| ISG1-41M08 | AC205645          | 120,605         | JCVI              | 2 OP            | 2                                 | DS712833                   |

|            |          |         |      |      |          |          |
|------------|----------|---------|------|------|----------|----------|
|            |          |         |      |      |          | DS712833 |
| ISG1-42P02 | AC205646 | 122,242 | JCVI | 1 C  | 1        | DS840967 |
| ISG1-43E15 | AC205647 | 115,710 | JCVI | 1 C  | multiple | N/A      |
| ISG1-44P02 | AC205648 | 126,904 | JCVI | 3 OP | multiple | N/A      |
| ISG1-47P02 | AC205649 | 112,049 | JCVI | 2 OP | multiple | N/A      |
| ISG1-56P02 | AC205650 | 107,316 | JCVI | 1 C  | 1        | DS636787 |
| ISG1-58P02 | AC205651 | 172,210 | JCVI | 2 OP | 1        | DS879425 |
| ISG1-62P02 | AC205652 | 50,437  | JCVI | 1 C  | multiple | N/A      |
| ISG1-63P02 | AC205653 | 108,041 | JCVI | 1 C  | 3        | DS976271 |
|            |          |         |      |      |          | DS897480 |
|            |          |         |      |      |          | DS981194 |
| ISG1-69P02 | AC205654 | 14,567  | JCVI | 1 C  | multiple | N/A      |

---

Broad, the Broad Institute of MIT/Harvard; JCVI, J. Craig Venter Institute; C, complete assembly of BAC clone: BAC assembly sequence is complete and ungapped; OP, ordered pieces: the BAC assembly is incomplete but the order of contigs comprising the BAC is known; UP, unordered pieces: the BAC assembly is incomplete and the order of the pieces cannot be deduced based on read mate pair information; <sup>a</sup>numeric value indicating number of IscaW1 scaffolds that align to the assembled BAC clone; multiple, 10 or more IscaW1 scaffolds align to the sequence of the assembled BAC clone.

**Supplementary Table 5. Analysis of gene content of *Ixodes scapularis* BAC clones.** The IscaW1 predicted protein sequences were queried against the sequence of assembled BAC clones using BLASTX.

| BAC Clone<br>GenBank<br>Accession | BAC<br>length<br>(bp) | Genbank<br>Protein Locus<br>Tag | IscaW1<br>Gene<br>length (bp) | Hit coordinates on BAC |         | % ID to<br>annotated<br>IscaW1 protein | Gene coverage<br>(%BAC/IscaW1) | Protein name                                 |
|-----------------------------------|-----------------------|---------------------------------|-------------------------------|------------------------|---------|----------------------------------------|--------------------------------|----------------------------------------------|
|                                   |                       |                                 |                               | 5' end                 | 3' end  |                                        |                                |                                              |
| AC205647                          | 115,710               | ISCW001627                      | 999                           | 71,697                 | 72,691  | 96.2                                   | 100                            | hypothetical protein                         |
| AC205650                          | 107,316               | ISCW001662                      | 1,595                         | 40,314                 | 41,908  | 100                                    | 100                            | voltage-gated potassium channel              |
| AC205637                          | 132,125               | ISCW005308                      | 1,139                         | 1,261                  | 2,400   | 95.18                                  | 99.82                          | conserved hypothetical protein               |
| AC192428                          | 109,864               | ISCW005551                      | 813                           | 51,858                 | 52,672  | 97.06                                  | 100                            | hypothetical protein                         |
| AC205642                          | 110,473               | ISCW007049                      | 903                           | 11,042                 | 11,941  | 95.57                                  | 100                            | hypothetical protein                         |
| AC205646                          | 122,242               | ISCW007900                      | 912                           | 12,862                 | 13,716  | 97.19                                  | 93.53                          | conserved hypothetical protein               |
| AC192414                          | 117,688               | ISCW008378                      | 1,017                         | 104,265                | 105,120 | 96.85                                  | 84.17                          | hypothetical protein                         |
| AC205636                          | 106,974               | ISCW009194                      | 1,776                         | 104,329                | 106,149 | 95.28                                  | 100                            | leucine-rich transmembrane protein, putative |
| AC205645                          | 120,605               | ISCW009445                      | 1,086                         | 36,434                 | 37,293  | 98.84                                  | 79.01                          | hypothetical protein                         |
| AC205637                          | 132,125               | ISCW011925                      | 1,182                         | 99,621                 | 100,799 | 97.88                                  | 99.83                          | hypothetical protein                         |
| AC205637                          | 132,125               | ISCW011924                      | 909                           | 101,454                | 102,362 | 97.14                                  | 100                            | hypothetical protein                         |
| AC192418                          | 114,701               | ISCW012420                      | 1,188                         | 101,002                | 102,058 | 95.84                                  | 87.96                          | polyprotein of retroviral origin             |
| AC205636                          | 106,974               | ISCW013209                      | 1,974                         | 51,710                 | 53,682  | 97.63                                  | 100                            | hypothetical protein                         |
| AC205648                          | 126,904               | ISCW014746                      | 1,401                         | 75,055                 | 76,459  | 96.59                                  | 99.86                          | hypothetical protein                         |
| AC205653                          | 108,041               | ISCW015369                      | 753                           | 94,678                 | 95,428  | 98.93                                  | 99.73                          | hypothetical protein                         |
| AC192428                          | 109,864               | ISCW017315                      | 1,113                         | 48,937                 | 49,821  | 97.3                                   | 79.78                          | hypothetical protein                         |
| AC192418                          | 114,701               | ISCW018410                      | 1,799                         | 76,283                 | 78,081  | 98.78                                  | 100                            | conserved hypothetical protein               |
| AC192422                          | 135,954               | ISCW019007                      | 1,464                         | 88,949                 | 90,400  | 96.6                                   | 99.8                           | transmembrane protein C9orf46                |
| AC192422                          | 135,954               | ISCW019010                      | 1,083                         | 16,384                 | 17,471  | 99.17                                  | 100                            | conserved hypothetical protein               |
| AC205645                          | 120,605               | ISCW019863                      | 2,507                         | 86,223                 | 88,736  | 96.07                                  | 100                            | zinc finger protein, putative                |
| AC205645                          | 120,605               | ISCW019864                      | 4,307                         | 89,682                 | 93,981  | 95.79                                  | 99.72                          | zinc finger protein, putative                |
| AC205635                          | 104,824               | ISCW019867                      | 6,487                         | 80,684                 | 87,155  | 98.68                                  | 100                            | zinc finger protein, putative                |
| AC205635                          | 104,824               | ISCW019869                      | 1,182                         | 52,935                 | 54,101  | 97.29                                  | 100                            | zinc finger protein, putative                |
| AC205635                          | 104,824               | ISCW019871                      | 1,353                         | 4,616                  | 5,971   | 99.41                                  | 100                            | carbon-nitrogen hydrolase                    |
| AC205646                          | 122,242               | ISCW020015                      | 945                           | 111,615                | 112,559 | 100                                    | 100                            | hypothetical protein                         |
| AC192421                          | 137,442               | ISCW021499                      | 843                           | 18,199                 | 19,056  | 96.5                                   | 99.88                          | hypothetical protein                         |
| AC192421                          | 137,442               | ISCW021498                      | 897                           | 46,540                 | 47,435  | 98.11                                  | 99.55                          | hypothetical protein                         |
| AC205640                          | 109,965               | ISCW024821                      | 1,090                         | 6,451                  | 7,539   | 99.45                                  | 100                            | hypothetical protein                         |

**Supplementary Table 6. Putative microRNA genes identified in the *Ixodes scapularis* genome.** MicroRNA gene predictions were consolidated from miRBase<sup>160</sup>, miROrtho<sup>161</sup>, and VectorBase<sup>162</sup>, resulting in a conservative set of 45 miRNAs. Family: assigned based on similarity to miRBase miRNAs. miRBase-ID, miROrtho-ID, VectorBase-ID: resource specific gene identifiers. miRBase-Family: family identifier, if predicted. Chromosome, Start, End, Strand: location in the *I. scapularis* genome or trace reads.

| Family           | miRBase-ID | miROrtho-ID | VectorBase-ID | miRBase-Family | Scaffold | Start (bp) | End (bp) | Strand |
|------------------|------------|-------------|---------------|----------------|----------|------------|----------|--------|
| <b>bantam</b>    | MI0012259  | 616211      | NA            | MIPF0000153    | DS612599 | 38772      | 38872    | -      |
| <b>mir-133</b>   | MI0012266  | NA          | NA            | MIPF0000029    | DS613658 | 228744     | 228844   | -      |
| <b>mir-7</b>     | MI0012282  | 615892      | NA            | MIPF0000022    | DS629750 | 8358       | 8437     | -      |
| <b>mir-263</b>   | MI0012272  | NA          | ISCW000811    | MIPF0000122    | DS633978 | 93542      | 93641    | +      |
| <b>mir-263</b>   | NA         | 616209      | ISCW000812    | NA             | DS633978 | 112822     | 112905   | +      |
| <b>mir-96</b>    | MI0012288  | NA          | ISCW000813    | MIPF0000072    | DS633978 | 113211     | 113315   | +      |
| <b>mir-279</b>   | MI0012274  | 615761      | ISCW000516    | MIPF0000184    | DS634011 | 38506      | 38597    | +      |
| <b>mir-153</b>   | MI0012268  | 617851      | NA            | MIPF0000050    | DS642248 | 1296642    | 1296742  | -      |
| <b>mir-219</b>   | MI0012270  | NA          | ISCW002511    | MIPF0000044    | DS658596 | 21107      | 21207    | -      |
| <b>mir-315</b>   | MI0012278  | NA          | NA            | MIPF0000141    | DS711462 | 57333      | 57433    | +      |
| <b>mir-8</b>     | MI0012286  | 615572      | ISCW005313    | MIPF0000019    | DS755496 | 12152      | 12245    | -      |
| <b>mir-2001</b>  | MI0010250  | 616271      | NA            | none           | DS758004 | 38911      | 38988    | -      |
| <b>mir-2</b>     | MI0012276  | NA          | NA            | MIPF0000049    | DS799611 | 45157      | 45257    | -      |
| <b>mir-2</b>     | MI0012277  | 616921      | NA            | MIPF0000049    | DS799611 | 45547      | 45647    | -      |
| <b>mir-71</b>    | MI0012283  | 616923      | NA            | MIPF0000278    | DS799611 | 45689      | 45789    | -      |
| <b>mir-184</b>   | MI0012269  | NA          | NA            | MIPF0000059    | DS803854 | 570        | 670      | -      |
| <b>mir-1</b>     | MI0012261  | NA          | ISCW019387    | MIPF0000038    | DS811420 | 416289     | 416380   | +      |
| <b>mir-1905</b>  | NA         | 616494      | NA            | NA             | DS833022 | 58235      | 58298    | -      |
| <b>mir-124</b>   | MI0012265  | NA          | ISCW009604    | MIPF0000021    | DS840700 | 85144      | 85244    | +      |
| <b>none</b>      | MI0015941  | NA          | NA            | none           | DS841188 | 7191       | 7293     | +      |
| <b>mir-137</b>   | MI0012267  | 617785      | NA            | MIPF0000106    | DS847994 | 158277     | 158377   | -      |
| <b>mir-276</b>   | MI0016443  | 616110      | NA            | none           | DS848078 | 34717      | 34803    | -      |
| <b>mir-335</b>   | NA         | 618522      | NA            | NA             | DS850031 | 1991       | 2088     | +      |
| <b>mir-1993</b>  | MI0015940  | NA          | NA            | none           | DS862055 | 102        | 182      | +      |
| <b>mir-1175</b>  | NA         | 616890      | NA            | NA             | DS874548 | 51760      | 51844    | -      |
| <b>mir-750</b>   | MI0012284  | 616924      | NA            | MIPF0000796    | DS874548 | 52964      | 53064    | -      |
| <b>mir-9</b>     | MI0012285  | NA          | NA            | MIPF0000014    | DS885551 | 436490     | 436590   | +      |
| <b>mir-317</b>   | MI0012279  | 617989      | NA            | MIPF0000144    | DS891538 | 57423      | 57523    | -      |
| <b>mir-iab-4</b> | MI0016445  | 617926      | NA            | MIPF0000151    | DS891538 | 738905     | 739003   | -      |
| <b>mir-iab-4</b> | NA         | 617910      | NA            | NA             | DS891538 | 738924     | 738992   | +      |
| <b>mir-10</b>    | MI0012262  | NA          | NA            | MIPF0000033    | DS891538 | 2780812    | 2780883  | +      |

|                |           |        |            |             |                    |         |         |   |
|----------------|-----------|--------|------------|-------------|--------------------|---------|---------|---|
| <b>mir-993</b> | MI0012289 | 617990 | NA         | MIPF0000698 | DS891538           | 3285820 | 3285911 | - |
| <b>mir-67</b>  | MI0012281 | 617852 | NA         | MIPF0000293 | DS911299           | 1700291 | 1700391 | - |
| <b>mir-87</b>  | MI0012287 | NA     | NA         | MIPF0000152 | DS929532           | 41471   | 41571   | - |
| <b>mir-375</b> | MI0012280 | NA     | NA         | MIPF0000114 | DS929532           | 41471   | 41571   | - |
| <b>mir-87</b>  | NA        | 617584 | NA         | NA          | DS929532           | 41890   | 41991   | - |
| <b>mir-12</b>  | MI0012264 | NA     | NA         | MIPF0000181 | DS942119           | 45739   | 45839   | - |
| <b>mir-305</b> | MI0016444 | 616960 | NA         | MIPF0000158 | DS945001           | 228258  | 228352  | - |
| <b>mir-275</b> | MI0012273 | 617124 | NA         | MIPF0000187 | DS945001           | 243239  | 243339  | - |
| <b>mir-190</b> | NA        | 616305 | NA         | NA          | DS969850           | 171528  | 171624  | + |
| <b>mir-125</b> | NA        | NA     | ISCW023847 | NA          | DS978597           | 217027  | 217099  | - |
| <b>mir-99</b>  | MI0012263 | NA     | ISCW023848 | MIPF0000025 | DS978597           | 252465  | 252565  | - |
| <b>let-7</b>   | MI0012260 | NA     | NA         | MIPF0000002 | gnl tij 1145246679 | 601     | 700     | + |
| <b>mir-29</b>  | MI0012275 | NA     | NA         | MIPF0000009 | gnl tij 1308393763 | 736     | 831     | + |
| <b>mir-252</b> | MI0012271 | NA     | NA         | MIPF0000285 | gnl tij 1711070620 | 757     | 857     | + |

---

**Supplementary Table 7. Proportions of shared intron positions across 12 animal species.** Examining conservation of intron positions between *ISCAP*, *DPULE* and either the five insects (*PHUMA*, *NVITR*, *TCAST*, *AGAMB*, *DMELA*) or the five non-arthropods (*NVECT*, *HSAPI*, *MMUSC*, *GGALL*, *DRERI*) reveals that greater than 10 times more intron positions are shared exclusively between at least one of the outgroup species (Cnidaria or Vertebrata) and *ISCAP*, compared to *DPULE* (13.80% compared to 1.08%). Conversely, *DPULE* shares about 4 times more intron positions exclusively with insects (2.34% compared to 0.58%). The percentages shown in Fig. B are the mean values from the numbers of shared or unique positions out of the total number of intron positions (4,621 SSC and 13,459 RSC) as detailed in the table. Abbreviations: *NVECT*, *Nematostella vectensis*; *HSAPI*, *Homo sapiens*; *MMUSC*, *Mus musculus*; *GGALL*, *Gallus gallus*; *DRERI*, *Danio rerio*; *ISCAP*, *Ixodes scapularis*; *DPULE*, *Daphnia pulex*; *PHUMA*, *Pediculus humanus*; *NVITR*, *Nasonia vitripennis*; *TCAST*, *Tribolium castaneum*; *AGAMB*, *Anopheles gambiae*; *DMELA*, *Drosophila melanogaster*.

| Intron Positions     | SSC  | RSC   | SSC%  | RSC%  | Mean% |
|----------------------|------|-------|-------|-------|-------|
| OUT ONLY             | 656  | 1776  | 14.20 | 13.20 | 13.70 |
| INS ONLY             | 128  | 403   | 2.77  | 2.99  | 2.88  |
| OUT-ISCAP ONLY       | 659  | 1795  | 14.26 | 13.34 | 13.80 |
| OUT-DPULE ONLY       | 47   | 155   | 1.02  | 1.15  | 1.08  |
| INS-ISCAP ONLY       | 24   | 85    | 0.52  | 0.63  | 0.58  |
| INS-DPULE ONLY       | 108  | 314   | 2.34  | 2.33  | 2.34  |
| OUT-INS-ISCAP ONLY   | 330  | 1116  | 7.14  | 8.29  | 7.72  |
| OUT-INS-DPULE ONLY   | 180  | 456   | 3.90  | 3.39  | 3.64  |
| OUT-ISCAP-DPULE ONLY | 68   | 180   | 1.47  | 1.34  | 1.40  |
| INS-ISCAP-DPULE ONLY | 27   | 52    | 0.58  | 0.39  | 0.49  |
| ISCAP-DPULE ONLY     | 12   | 23    | 0.26  | 0.17  | 0.22  |
| OUT-INS ONLY         | 239  | 646   | 5.17  | 4.80  | 4.99  |
| OUT-INS-ISCAP-DPULE  | 432  | 1169  | 9.35  | 8.69  | 9.02  |
| NVECT ONLY           | 476  | 1382  | 10.30 | 10.27 | 10.28 |
| HSAPI ONLY           | 3    | 12    | 0.06  | 0.09  | 0.08  |
| MMUSC ONLY           | 3    | 8     | 0.06  | 0.06  | 0.06  |
| GGALL ONLY           | 37   | 124   | 0.80  | 0.92  | 0.86  |
| DRERI ONLY           | 40   | 95    | 0.87  | 0.71  | 0.79  |
| ISCAP ONLY           | 154  | 501   | 3.33  | 3.72  | 3.53  |
| DPULE ONLY           | 502  | 1579  | 10.86 | 11.73 | 11.30 |
| PHUMA ONLY           | 138  | 459   | 2.99  | 3.41  | 3.20  |
| NVITR ONLY           | 136  | 431   | 2.94  | 3.20  | 3.07  |
| TCAST ONLY           | 87   | 302   | 1.88  | 2.24  | 2.06  |
| AGAMB ONLY           | 48   | 164   | 1.04  | 1.22  | 1.13  |
| DMELA ONLY           | 87   | 232   | 1.88  | 1.72  | 1.80  |
| Totals               | 4621 | 13459 | 100   | 100   | 100   |

OUT: at least one of 5 outgroup species, *NVECT*, *HSAPI*, *MMUSC*, *GGALL*, *DRERI*.

INS: at least one of 5 insect species, *PHUMA*, *NVITR*, *TCAST*, *AGAMB*, *DMELA*.

SSC: strict single-copy; RSC: relaxed single-copy.

**Supplementary Table 8. Proportions of shared *Ixodes scapularis* intron positions.**

Examining pairwise conservation of intron positions between *ISCAP* and each of the other eleven species shows the greatest sharing with the non-arthropods (*NVECT*, *HSAPI*, *MMUSC*, *GGALL*, *DRERI*): about 3 times more than with *AGAMB* and *DMELA*, and about 1.5-1.8 times more than with *DPULE*, *PHUMA*, *NVITR*, and *TCAST*.

Abbreviations: *NVECT*, *Nematostella vectensis*; *HSAPI*, *Homo sapiens*; *MMUSC*, *Mus musculus*; *GGALL*, *Gallus gallus*; *DRERI*, *Danio rerio*; *ISCAP*, *Ixodes scapularis*; *DPULE*, *Daphnia pulex*; *PHUMA*, *Pediculus humanus*; *NVITR*, *Nasonia vitripennis*; *TCAST*, *Tribolium castaneum*; *AGAMB*, *Anopheles gambiae*; *DMELA*, *Drosophila melanogaster*.

| <b><i>ISCAP</i></b> | <b>ALL SSC %</b> | <b>ALL RSC %</b> | <b>SHARED SSC %</b> | <b>SHARED RSC %</b> |
|---------------------|------------------|------------------|---------------------|---------------------|
| <b><i>NVECT</i></b> | 29.86            | 30.07            | 35.01               | 35.67               |
| <b><i>HSAPI</i></b> | 31.84            | 32.3             | 33.13               | 33.82               |
| <b><i>MMUSC</i></b> | 31.83            | 32.03            | 33.12               | 33.54               |
| <b><i>GGALL</i></b> | 31.71            | 32.08            | 33.28               | 33.92               |
| <b><i>DRERI</i></b> | 31.84            | 32.18            | 33.43               | 33.94               |
| <b><i>DPULE</i></b> | 17.49            | 16.09            | 22.22               | 21.04               |
| <b><i>PHUMA</i></b> | 20.89            | 21.12            | 23.3                | 23.92               |
| <b><i>NVITR</i></b> | 19.5             | 19.92            | 21.79               | 22.57               |
| <b><i>TCAST</i></b> | 17.02            | 16.62            | 18.85               | 18.72               |
| <b><i>AGAMB</i></b> | 10.76            | 11.09            | 11.85               | 12.39               |
| <b><i>DMELA</i></b> | 10.31            | 10.85            | 11.57               | 12.25               |

SSC: strict single-copy, RSC: relaxed single-copy.

ALL: *ISCAP*-OTHER Shared / *ISCAP*-OTHER Total Intron Positions.

SHARED: *ISCAP*-OTHER Shared / *ISCAP*-OTHER Total Non-Unique Intron Positions.

**Supplementary Table 9. Intron presence, gain, and loss estimates across the 12 animal species phylogeny.** Intron presence, gain, and loss estimates across the phylogeny for the strict (SSC) and relaxed (RSC) sets of orthologs using Dollo Parsimony (DP) and Posterior Probability (PP) methods of the MALIN suite for maximum likelihood analysis of intron evolution in eukaryotes<sup>33</sup>. The normalized numbers and the species phylogeny with all named nodes are presented in Supplementary Fig. 9. Abbreviations: *NVECT*, *Nematostella vectensis*; *HSAPI*, *Homo sapiens*; *MMUSC*, *Mus musculus*; *GGALL*, *Gallus gallus*; *DRERI*, *Danio rerio*; *ISCAP*, *Ixodes scapularis*; *DPULE*, *Daphnia pulex*; *PHUMA*, *Pediculus humanus*; *NVITR*, *Nasonia vitripennis*; *TCAST*, *Tribolium castaneum*; *AGAMB*, *Anopheles gambiae*; *DMELA*, *Drosophila melanogaster*.

|                           | SSC30: 4621 sites |      |      |         |      |      | RSC30: 13459 sites |      |      |         |      |      |
|---------------------------|-------------------|------|------|---------|------|------|--------------------|------|------|---------|------|------|
|                           | DP                |      |      | PP      |      |      | DP                 |      |      | PP      |      |      |
| Branch/Leaf               | present           | gain | loss | present | gain | loss | present            | gain | loss | present | gain | loss |
| <b>DMELA</b>              | 506               | 87   | 165  | 506     | 94   | 242  | 1492               | 232  | 447  | 1492    | 236  | 743  |
| <b>Diptera</b>            | 584               | 38   | 307  | 654     | 99   | 317  | 1707               | 125  | 834  | 2000    | 352  | 826  |
| <b>AGAMB</b>              | 487               | 48   | 145  | 487     | 52   | 219  | 1420               | 164  | 451  | 1420    | 133  | 713  |
| <b>Diptera-Coleoptera</b> | 853               | 12   | 359  | 872     | 25   | 357  | 2416               | 52   | 1052 | 2473    | 110  | 1107 |
| <b>TCAST</b>              | 768               | 87   | 172  | 768     | 105  | 209  | 2223               | 302  | 495  | 2223    | 362  | 612  |
| <b>Holometabola</b>       | 1200              | 16   | 218  | 1203    | 0    | 175  | 3416               | 45   | 648  | 3470    | 0    | 486  |
| <b>NVITR</b>              | 1053              | 136  | 283  | 1053    | 187  | 337  | 3011               | 431  | 836  | 3011    | 564  | 1023 |
| <b>Insecta</b>            | 1402              | 62   | 127  | 1378    | 47   | 11   | 4019               | 181  | 358  | 3957    | 93   | 0    |
| <b>PHUMA</b>              | 1118              | 138  | 422  | 1118    | 170  | 430  | 3284               | 459  | 1194 | 3284    | 562  | 1235 |
| <b>Pancrustacea</b>       | 1467              | 108  | 659  | 1342    | 122  | 1051 | 4196               | 314  | 1795 | 3864    | 421  | 2727 |
| <b>DPULE</b>              | 1376              | 502  | 593  | 1376    | 614  | 580  | 3928               | 1579 | 1847 | 3928    | 1911 | 1847 |
| <b>Arthropoda</b>         | 2018              | 63   | 422  | 2271    | 86   | 302  | 5677               | 160  | 1043 | 6170    | 128  | 806  |
| <b>ISCAP</b>              | 1706              | 154  | 466  | 1706    | 148  | 713  | 4921               | 501  | 1257 | 4921    | 524  | 1773 |
| <b>Coelomata</b>          | 2377              | 279  | 0    | 2487    | 398  | 14   | 6560               | 866  | 0    | 6848    | 1205 | 112  |
| <b>DRERI</b>              | 2392              | 40   | 20   | 2392    | 41   | 23   | 6581               | 95   | 65   | 6581    | 100  | 66   |
| <b>Vertebrata</b>         | 2372              | 231  | 236  | 2374    | 183  | 295  | 6551               | 716  | 725  | 6547    | 593  | 894  |
| <b>GGALL</b>              | 2334              | 37   | 44   | 2334    | 37   | 44   | 6552               | 124  | 82   | 6552    | 129  | 80   |
| <b>Tetrapoda</b>          | 2341              | 3    | 34   | 2341    | 1    | 34   | 6510               | 15   | 56   | 6504    | 9    | 52   |
| <b>MMUSC</b>              | 2337              | 3    | 4    | 2337    | 3    | 4    | 6380               | 8    | 112  | 6380    | 10   | 113  |
| <b>Mammalia</b>           | 2338              | 0    | 3    | 2338    | 0    | 3    | 6484               | 2    | 28   | 6483    | 2    | 23   |
| <b>HSAPI</b>              | 2336              | 3    | 5    | 2336    | 3    | 5    | 6454               | 12   | 42   | 6454    | 12   | 41   |
| <b>Metazoa</b>            | 2098              | NA   | NA   | 2103    | NA   | NA   | 5694               | NA   | NA   | 5756    | NA   | NA   |
| <b>NVECT</b>              | 2574              | 476  | 0    | 2574    | 471  | 0    | 7076               | 1382 | 0    | 7076    | 1320 | 0    |

**Supplementary Table 10. Comparisons of intron length distributions across 12 animal species.** Comparison of intron lengths among the 12 species for the Strict Single-Copy (SSC) and Relaxed Single-Copy (RSC) sets of orthologs. Intron counts, their median and mean lengths, and the p-values from Wilcoxon tests that compare the length distributions are presented for 1. all informative introns, 2. informative introns found in *ISCAP* and *DPULE* and at least one non-arthropod and at least one insect, 3. informative introns shared between *ISCAP* and each of the other species. The length distributions are presented as boxplots in Supplementary Fig. 7 and the species for which the shared site data are presented in Fig. 3C (main text) are indicated with an asterisk (\*). Abbreviations: P-Wilcox, paired Wilcoxon test; *NVECT*, *Nematostella vectensis*; *HSAPI*, *Homo sapiens*; *MMUSC*, *Mus musculus*; *GGALL*, *Gallus gallus*; *DRERI*, *Danio rerio*; *ISCAP*, *Ixodes scapularis*; *DPULE*, *Daphnia pulex*; *PHUMA*, *Pediculus humanus*; *NVITR*, *Nasonia vitripennis*; *TCAST*, *Tribolium castaneum*; *AGAMB*, *Anopheles gambiae*; *DMELA*, *Drosophila melanogaster*.

| SSC          | 1. All: 4621 sites |               |               |                 | 2. Shared: 432 sites |               |               |                 | 3. <i>ISCAP</i> -shared |               |               |                 |
|--------------|--------------------|---------------|---------------|-----------------|----------------------|---------------|---------------|-----------------|-------------------------|---------------|---------------|-----------------|
|              | Count              | Median        | Mean          | Wilcox          | Count                | Median        | Mean          | Wilcox          | Count                   | Median        | Mean          | P-Wilcox        |
| <i>NVECT</i> | 2574               | 404.0         | 635.0         | <2.2e-16        | 371                  | 421.0         | 684.8         | <2.2e-16        | 1278                    | 401.0         | 628.7         | <2.20e-16       |
| <i>HSAPI</i> | 2336               | 1386.0        | 2998.1        | 6.60e-05        | 399                  | 1474.0        | 3575.0        | 8.02e-03        | 1287                    | 1385.0        | 3169.0        | 1.35e-05        |
| <i>MMUSC</i> | <b>2337</b>        | <b>1128.0</b> | <b>2111.0</b> | <b>9.22e-02</b> | <b>401</b>           | <b>1288.0</b> | <b>2550.0</b> | <b>6.14e-01</b> | <b>1287</b>             | <b>1191.0</b> | <b>2257.0</b> | <b>6.23e-01</b> |
| <i>GGALL</i> | 2334               | 665.5         | 1474.7        | <2.2e-16        | 398                  | 703.5         | 1473.0        | 1.43e-07        | 1281                    | 685.0         | 1364.0        | <2.20e-16       |
| <i>DRERI</i> | 2392               | 666.5         | 1548.1        | <2.2e-16        | 407                  | 861.0         | 1819.6        | 3.88e-05        | 1305                    | 713.0         | 1589.0        | 1.98e-13        |
| <i>ISCAP</i> | <b>1706</b>        | <b>1223.5</b> | <b>2053.3</b> | <b>NA</b>       | <b>432</b>           | <b>1194.5</b> | <b>2187.7</b> | <b>NA</b>       | <b>1552</b>             | <b>1205.5</b> | <b>2043.6</b> | <b>NA</b>       |
| <i>DPULE</i> | 1376               | 66.0          | 91.5          | <2.2e-16        | 432                  | 66.0          | 99.7          | <2.2e-16        | 539                     | 66.0          | 94.9          | <2.20e-16       |
| <i>PHUMA</i> | 1118               | 87.0          | 143.3         | <2.2e-16        | 313                  | 90.0          | 160.3         | <2.2e-16        | 590                     | 88.0          | 141.3         | <2.20e-16       |
| <i>NVITR</i> | 1053               | 81.0          | 357.8         | <2.2e-16        | 304                  | 81.0          | 348.8         | <2.2e-16        | 538                     | 81.0          | 268.3         | <2.20e-16       |
| <i>TCAST</i> | 768                | 51.0          | 435.6         | <2.2e-16        | 246                  | 50.0          | 436.2         | <2.2e-16        | 421                     | 50.0          | 357.1         | <2.20e-16       |
| <i>AGAMB</i> | 487                | 78.0          | 539.7         | <2.2e-16        | 146                  | 77.0          | 557.4         | <2.2e-16        | 236                     | 78.0          | 534.7         | <2.20e-16       |
| <i>DMELA</i> | 506                | 62.0          | 351.3         | <2.2e-16        | 143                  | 62.0          | 183.4         | <2.2e-16        | 228                     | 62.0          | 408.2         | <2.20e-16       |

  

| RSC            | 1. All: 13459 sites |               |               |                 | 2. Shared: 1169 sites |               |               |                 | 3. <i>ISCAP</i> -shared |               |               |                 |
|----------------|---------------------|---------------|---------------|-----------------|-----------------------|---------------|---------------|-----------------|-------------------------|---------------|---------------|-----------------|
|                | Count               | Median        | Mean          | Wilcox          | Count                 | Median        | Mean          | Wilcox          | Count                   | Median        | Mean          | P-Wilcox        |
| <i>NVECT</i>   | 7076                | 407.0         | 645.9         | <2.2e-16        | 976                   | 426.5         | 662.6         | <2.2e-16        | 3608                    | 408.0         | 648.8         | <2.20e-16       |
| <i>HSAPI</i> * | 6454                | 1483.0        | 3687.2        | <2.2e-16        | 1060                  | 1745.5        | 4723.6        | 7.93e-12        | 3674                    | 1552.0        | 4042.0        | <2.20e-16       |
| <i>MMUSC</i> * | <b>6380</b>         | <b>1224.5</b> | <b>2743.9</b> | <b>3.26e-01</b> | <b>1050</b>           | <b>1447.0</b> | <b>3751.0</b> | <b>3.68e-04</b> | <b>3620</b>             | <b>1288.0</b> | <b>3052.5</b> | <b>1.98e-02</b> |
| <i>GGALL</i>   | 6552                | 693.5         | 1700.0        | <2.2e-16        | 1070                  | 761.0         | 2217.1        | 2.10e-11        | 3680                    | 727.0         | 1815.0        | <2.20e-16       |
| <i>DRERI</i>   | 6581                | 728.0         | 1787.0        | <2.2e-16        | 1084                  | 935.0         | 2204.0        | 1.81e-07        | 3701                    | 785.0         | 1917.0        | <2.20e-16       |
| <i>ISCAP</i> * | <b>4921</b>         | <b>1213.0</b> | <b>2034.0</b> | <b>NA</b>       | <b>1169</b>           | <b>1204.0</b> | <b>2125.0</b> | <b>NA</b>       | <b>4420</b>             | <b>1188.0</b> | <b>1999.0</b> | <b>NA</b>       |
| <i>DPULE</i> * | 3928                | 66.0          | 86.9          | <2.2e-16        | 1169                  | 67.0          | 89.2          | <2.2e-16        | 1424                    | 67.0          | 86.9          | <2.20e-16       |
| <i>PHUMA</i> * | 3284                | 88.0          | 155.8         | <2.2e-16        | 861                   | 91.0          | 188.4         | <2.2e-16        | 1733                    | 89.0          | 163.3         | <2.20e-16       |
| <i>NVITR</i> * | 3011                | 82.0          | 565.1         | <2.2e-16        | 816                   | 82.0          | 436.0         | <2.2e-16        | 1580                    | 82.0          | 419.2         | <2.20e-16       |
| <i>TCAST</i>   | 2223                | 51.0          | 459.9         | <2.2e-16        | 628                   | 50.0          | 374.4         | <2.2e-16        | 1187                    | 50.0          | 368.4         | <2.20e-16       |
| <i>AGAMB</i>   | 1420                | 80.5          | 473.8         | <2.2e-16        | 408                   | 81.0          | 628.9         | <2.2e-16        | 703                     | 80.0          | 574.6         | <2.20e-16       |
| <i>DMELA</i> * | 1492                | 63.0          | 256.9         | <2.2e-16        | 383                   | 64.0          | 305.3         | <2.2e-16        | 696                     | 63.0          | 328.5         | <2.20e-16       |

**Supplementary Table 11. Summary of gene group counts using OrthoMCL clustering of reciprocal best hit BLASTP.**

| Species                                   | oGene | nGroup | UDup  | Orth1 | OrDup | OrGrp | OrMis1 |
|-------------------------------------------|-------|--------|-------|-------|-------|-------|--------|
| <b>No. in Chelicerata</b>                 |       |        |       |       |       |       |        |
| <i>Ixodes scapularis</i>                  | 11817 | 8594   | 2079  | 7239  | 2499  | 7945  | 110    |
| <i>Tetranychus urticae</i>                | 11194 | 6685   | 4000  | 5227  | 1967  | 5937  | 147    |
| <i>Dermacentor variabilis</i>             | 41142 | 11157  | 31914 | 4076  | 5152  | 4865  | 1189   |
| <b>No. in Crustacea</b>                   |       |        |       |       |       |       |        |
| <i>Daphnia magna</i>                      | 38049 | 20334  | 20313 | 9092  | 8644  | 12354 | 5      |
| <i>Daphnia pulex</i>                      | 27825 | 14456  | 10784 | 10410 | 6631  | 11866 | 10     |
| <i>Pandalus latirostris</i>               | 28999 | 13397  | 19164 | 5330  | 4505  | 7017  | 122    |
| <b>No. in Insecta</b>                     |       |        |       |       |       |       |        |
| <i>Acrythosiphon pisum</i>                | 24954 | 9724   | 8848  | 6778  | 9328  | 8068  | 43     |
| <i>Drosophila melanogaster</i>            | 11523 | 8449   | 2519  | 6925  | 2079  | 7627  | 38     |
| <i>Schistocerca gregaria</i>              | 26797 | 14280  | 14667 | 6826  | 5304  | 8705  | 15     |
| <i>Tribolium castaneum</i>                | 12523 | 8919   | 2119  | 7584  | 2820  | 8429  | 29     |
| <i>Nasonia vitripennis</i>                | 18662 | 9605   | 7544  | 7480  | 3638  | 8259  | 23     |
| <b>No. in Vertebrate Outgroup Species</b> |       |        |       |       |       |       |        |
| <i>Homo sapiens</i>                       | 18820 | 11829  | 2310  | 8282  | 8228  | 11089 | 61     |
| <i>Danio rerio</i>                        | 19916 | 11777  | 3130  | 8139  | 8647  | 11171 | 84     |

oGene = number of genes with reciprocal best hits used by orthomcl.

nGroup = number of gene family groups (2+genes), orthology + species-unique.

OrGrp = count of ortho groups (nGroup = OrGrp + unique paralog groups).

UDup = species-unique duplicated paralog genes.

Orth1 = count of single ortho gene.

OrDup = count of duplicated ortho gene.

OrMis1 = groups missing gene all others have (ignoring human)

Data sources:

Chelicerata: *Ixodes scapularis* 2011, <https://www.vectorbase.org/>; *Tetranychus urticae*,

<http://www.nature.com/nature/journal/v479/n7374/pdf/nature10640.pdf>;

*Dermacentor variabilis*, <http://www.ncbi.nlm.nih.gov/pubmed/20060044>;

Crustacea: *Daphnia pulex* 2010,

[http://arthropods.eugenescience.org/EvidentialGene/daphnia/daphnia\\_genes2010/](http://arthropods.eugenescience.org/EvidentialGene/daphnia/daphnia_genes2010/);

*Daphnia magna* 2011, pre-release gene set; *Pandalus latirostris*,

<http://www.ncbi.nlm.nih.gov/pubmed/22016807>;

Insecta: *Acrythosiphon pisum* 2011, [http://arthropods.eugenescience.org/EvidentialGene/pea\\_aphid2/genes-bestof3/](http://arthropods.eugenescience.org/EvidentialGene/pea_aphid2/genes-bestof3/);

*Drosophila melanogaster*, NCBI RefSeq 2011; *Locusta migratoria*

<http://www.ncbi.nlm.nih.gov/pubmed/21209894>

*Tribolium castaneum*, UniProt 2011; *Nasonia vitripennis* 2012,

<http://arthropods.eugenescience.org/EvidentialGene/nasonia/>;

Vertebrates: *Homo sapiens*, NCBI RefSeq 2011; *Danio rerio*, NCBI RefSeq 2011

**Supplementary Table 12. Summary of tandem repeats identified from an *Ixodes scapularis* small insert genomic DNA library and FISH-based physical mapping to ISE18 cell line chromosomes.**

| Clone ID | Repeat Family | Repeat Length(s) (bp) | Copy Number(s) in End-sequence | Hybridization Intensity | Hybridization Description |
|----------|---------------|-----------------------|--------------------------------|-------------------------|---------------------------|
| A-02     | ISR-2         | 95                    | 12.8                           | NC                      | NC                        |
| A-03     | -             | 21, 26, 49            | 5.7, 13.8, 1.9                 | NS                      | NS                        |
| A-07     | ISR-3         | 376                   | 2.5                            | S                       | S                         |
| A-12     | -             | 14, 48                | 2.1, 2                         | NS                      | NS                        |
| A-17     | -             | 118                   | 1.9                            | M                       | S/D                       |
| A-22     | -             | None (control)        | NA                             | NS                      | NS                        |
| B-01     | -             | 35, 70                | 3.2, 2.8                       | S                       | D                         |
| B-08     | ISR-2a        | 95                    | 17.8                           | S                       | S                         |
| B-11     | -             | 4, 4, 12              | 40.3, 22, 12                   | W                       | D                         |
| B-13     | ISR-2c        | 97                    | 15.9                           | S                       | S                         |
| B-20     | -             | 11, 25, 25, 39        | 2.4, 3.2, 9.1, 4.2             | S                       | D                         |
| B-22     | -             | None (control)        | NA                             | NS                      | NS                        |
| B-24     | ISR-2b        | 96                    | 10.5                           | S                       | S                         |
| C-02     | -             | 41, 83                | 7.4, 3.7                       | NS                      | NS                        |
| C-07     | ISR-2c        | 97                    | 13.3                           | S                       | S                         |
| C-12     | -             | 63                    | 12                             | NS                      | NS                        |
| C-13     | -             | 26, 31                | 2.2, 6                         | M                       | D                         |
| C-20     | ISR-2a        | 95                    | 13.1                           | NC                      | NC                        |
| D-02     | ISR-2c        | 97                    | 13.8                           | NC                      | NC                        |
| D-03     | -             | 2, 32                 | 58.5, 2.3                      | W                       | D                         |
| D-12     | -             | 98                    | 2                              | W                       | D                         |
| D-19     | ISR-3         | 386                   | 2.1                            | NC                      | NC                        |
| D-23     | ISR-2b        | 96                    | 17.4                           | S                       | S                         |
| E-01     | ISR-2a        | 95                    | 14.4                           | NC                      | NC                        |
| E-09     | ISR-2a        | 95                    | 12.7                           | NC                      | NC                        |
| E-18     | ISR-2d        | 99                    | 12.9                           | S                       | S                         |
| E-19     | ISR-2a        | 95                    | 3.7                            | NC                      | NC                        |
| E-20     | -             | 2                     | 54.5                           | W                       | D                         |
| E-21     | -             | 196                   | 9.1                            | M                       | S/D                       |
| E-23     | -             | 36                    | 5.1                            | W                       | D                         |
| E-24     | ISR-2d        | 99                    | 12.3                           | S                       | S                         |
| F-11     | -             | 16, 33                | 2.1, 2.1                       | NS                      | NS                        |
| F-12     | -             | 2, 46                 | 30, 5.3                        | W                       | D                         |
| G-04     | ISR-2d        | 99                    | 13.8                           | S                       | S                         |
| G-14     | ISR-2a        | 95                    | 12.8                           | NC                      | NC                        |
| G-17     | -             | 37, 14                | 2.6, 3                         | W                       | D                         |
| G-20     | ISR-3         | 385                   | 2.9                            | S                       | S                         |
| H-16     | ISR-1         | 90, 179, 446          | 11.6, 5.8, 2                   | M                       | S                         |
| H-18     | -             | 44                    | 3.4                            | NS                      | NS                        |
| H-19     | -             | 16, 243               | 2.1, 2.7                       | M                       | D                         |
| H-21     | ISR-2d        | 99                    | 13.6                           | S                       | S                         |
| H-22     | ISR-2a        | 95                    | 15.8                           | NC                      | NC                        |
| H-24     | -             | 15, 17, 17, 44, 59    | 9.9, 2.6, 2.4, 3.2, 2.5        | W                       | D                         |
| I-01     | -             | 40, 41, 41, 81        | 2.5, 4.5, 3.6 1.9              | M                       | D                         |
| I-06     | ISR-2a        | 95                    | 12.1                           | NC                      | NC                        |
| I-22     | ISR-2a        | 95                    | 10.6                           | NC                      | NC                        |
| I-24     | ISR-2a        | 95                    | 17                             | S                       | S                         |

|      |        |               |                 |    |     |
|------|--------|---------------|-----------------|----|-----|
| J-02 | -      | 14, 40        | 7.9, 2          | NS | NS  |
| J-08 | -      | 22, 42        | 2.7, 2          | NS | NS  |
| J-15 | -      | 77            | 2               | W  | D   |
| K-01 | ISR-2a | 95            | 11              | NC | NC  |
| K-02 | ISR-2a | 95, 284       | 6.1, 2          | NC | NC  |
| K-05 | ISR-2b | 96            | 18.5            | S  | S   |
| K-13 | -      | 2, 40, 32, 2  | 31.5, 1.9, 2.5  | M  | D   |
| L-01 | -      | 18            | 10.4            | NS | NS  |
| L-10 | ISR-2a | 95            | 17.1            | S  | S   |
| L-23 | -      | 13, 17, 29    | 1.9, 9.5, 2     | NS | NS  |
| M-04 | ISR-2a | 95            | 16.7            | S  | S   |
| M-10 | -      | 135           | 8.2             | W  | D   |
| M-16 | ISR-2c | 97            | 12.9            | NC | NC  |
| M-17 | ISR-2c | 97            | 12.8            | NC | NC  |
| M-19 | ISR-2a | 95            | 10.5            | NC | NC  |
| M-21 | ISR-2a | 95            | 4.7             | NC | NC  |
| M-23 | -      | 2, 21         | 49.5, 2.4       | M  | D   |
| N-01 | -      | 71            | 4.5             | M  | D   |
| N-07 | ISR-2a | 95            | 13.5            | NC | NC  |
| N-11 | ISR-2c | 97            | 14.9            | NC | NC  |
| N-17 | -      | 6             | 16.7            | M  | D   |
| N-19 | ISR-2a | 95            | 15.3            | NC | NC  |
| O-03 | -      | 207, 413      | 8.4, 4.2        | S  | S/D |
| O-10 | ISR-2a | 95            | 15.2            | NC | NC  |
| O-14 | ISR-2d | 99            | 10.9            | S  | S   |
| O-15 | -      | 11, 32, 32    | 2.8, 3.8, 3.6   | NS | NS  |
| O-21 | -      | 6, 17, 18, 78 | 8, 3.4, 13.8, 2 | S  | D   |
| O-24 | -      | 155           | 3.7             | W  | D   |
| P-03 | -      | 27, 53, 83    | 12.4, 5.9 2.5   | W  | D   |
| P-07 | -      | 21            | 5               | NS | NS  |
| P-14 | ISR-2c | 97            | 16.1            | NC | NC  |

Hybridization intensity: S=strong; M=moderate; W=weak; NS=no signal, NC=not conducted. Hybridization descriptions: S=specific; D=dispersed; NS=no signal; NC=not conducted. The "Repeat Family" column indicates which of the tandem-repeat containing clones that were classified into ISR-1-3<sup>41</sup> or that contained different tandem repeats that remain unclassified (-).

**Supplementary Table 13. Summary of transposable elements identified in the *Ixodes scapularis* genome.**

| TE name                         | Elements per family | Copy Number    | Base pairs       | % Genome     |
|---------------------------------|---------------------|----------------|------------------|--------------|
| <b>Class I</b>                  |                     |                |                  |              |
| <b>LTR retrotransposons</b>     | <b>41</b>           | <b>29462</b>   | <b>11383395</b>  | <b>0.64</b>  |
| <i>Gypsy</i>                    | 37                  | 28997          | 11189309         | 0.63         |
| <i>Pao-Bel</i>                  | 4                   | 465            | 194086           | 0.01         |
| <b>Non-LTR retrotransposons</b> | <b>530</b>          | <b>606602</b>  | <b>118212063</b> | <b>6.70</b>  |
| <i>CR1</i>                      | 128                 | 133579         | 26561455         | 1.50         |
| <i>I</i>                        | 43                  | 49040          | 9402964          | 0.53         |
| <i>Jockey</i>                   | 2                   | 6              | 3896             | 0.00         |
| <i>L1</i>                       | 171                 | 201621         | 36843465         | 2.09         |
| <i>L2</i>                       | 65                  | 57882          | 11639922         | 0.66         |
| <i>R1</i>                       | 7                   | 430            | 61781            | 0.00         |
| <i>R4</i>                       | 2                   | 1924           | 582360           | 0.03         |
| <i>Other Non-LTR</i>            | 112                 | 162120         | 33116220         | 1.88         |
| <b>Penelope</b>                 |                     |                |                  |              |
| <i>Penelope</i>                 | 132                 | 94326          | 19113444         | 1.08         |
| <b>Class II</b>                 |                     |                |                  |              |
| <b>DNA transposons</b>          | <b>254</b>          | <b>293281</b>  | <b>54005181</b>  | <b>3.06</b>  |
| <i>hAT</i>                      | 52                  | 32713          | 7362901          | 0.42         |
| <i>Merlin</i>                   | 3                   | 652            | 160598           | 0.01         |
| <i>Mutator</i>                  | 10                  | 397            | 99572            | 0.01         |
| <i>P</i>                        | 35                  | 28807          | 4859952          | 0.28         |
| <i>PIF</i>                      | 30                  | 38609          | 7054230          | 0.40         |
| <i>piggyBac</i>                 | 76                  | 108314         | 21178514         | 1.20         |
| <i>Tc1mariner</i>               | 48                  | 83789          | 13289414         | 0.75         |
| <b>MITEs</b>                    | <b>234</b>          | <b>343838</b>  | <b>87535895</b>  | <b>4.96</b>  |
| <i>m2bp</i>                     | 17                  | 24668          | 6492577          | 0.37         |
| <i>m3bp</i>                     | 7                   | 7033           | 1537791          | 0.09         |
| <i>m4bp</i>                     | 88                  | 127330         | 31503909         | 1.78         |
| <i>m5bp</i>                     | 2                   | 1225           | 414964           | 0.02         |
| <i>m6bp</i>                     | 3                   | 7523           | 1738704          | 0.10         |
| <i>m7bp</i>                     | 3                   | 7746           | 1198574          | 0.07         |
| <i>m8bp</i>                     | 22                  | 56732          | 18130019         | 1.03         |
| <i>m9bp</i>                     | 2                   | 4802           | 892191           | 0.05         |
| <i>mTA</i>                      | 90                  | 106779         | 25627166         | 1.45         |
| <b>Unclassified</b>             | <b>98</b>           | <b>20073</b>   | <b>5849509</b>   | <b>0.33</b>  |
| <b>Total</b>                    | <b>1289</b>         | <b>1379140</b> | <b>294717617</b> | <b>16.69</b> |

This table represents a conservative estimation of the repeat content because we focused on manually annotated TEs. Annotation of long TEs is especially difficult given the fragmented nature of the genome assembly. Tandem repeats and satellite sequences are not included. TE copy numbers and base pairs were obtained by running RepeatMasker version 3.2.9 with the *Ixodes scapularis* TE library (available for

download from the TEfam database at: <http://tefam.biochem.vt.edu>) and VectorBase (<https://www.vectorbase.org/>).

**Supplementary Table 14. Summary of transposable elements identified in the *Ixodes scapularis* coding sequence.**

| Class                              | Total Families | Total Sequences | Bases Occupied     | Percent Genome |
|------------------------------------|----------------|-----------------|--------------------|----------------|
| <b>Class I</b>                     |                |                 |                    |                |
| L1                                 | 1,773          | 1,980           | 137,648,067        | 6.55           |
| Ty3_gypsy                          | 1,644          | 1,867           | 67,124,477         | 3.20           |
| Penelope                           | 290            | 328             | 18,329,691         | 0.87           |
| Pao Bel                            | 81             | 97              | 3,988,612          | 0.19           |
| Rnase_H                            | 24             | 26              | 164,423            | 0.01           |
| <b>Class II</b>                    |                |                 |                    |                |
| piggyBac                           | 80             | 90              | 8,723,874          | 0.42           |
| PIF                                | 40             | 43              | 7,637,650          | 0.36           |
| hAT                                | 102            | 129             | 7,538,310          | 0.36           |
| Mariner                            | 74             | 91              | 6,280,194          | 0.30           |
| P                                  | 54             | 58              | 6,054,528          | 0.29           |
| Mutator                            | 19             | 56              | 188,089            | 0.01           |
| Merlin                             | 3              | 3               | 160,327            | 0.01           |
| Unclassified<br>(mostly fragments) | 1,338          | 2,693           | 40,366,119         | 1.92           |
| <b>Total</b>                       | <b>5,522</b>   | <b>7,461</b>    | <b>304,204,361</b> | <b>14.49</b>   |

A transposable element genomic search was devised by (1) doing Psiblast of the coding regions of representatives of the diverse families of transposable elements against the non-redundant database from NCBI; (2) constructing matrices from the alignments to be used by the tool rpsBLAST; (3) by retrieving genomic matches by rpsBLAST against this database that are larger than 500 nt and  $e$  value  $< 1e^{-15}$ , with additional 500 nt of flanking regions; (4) finding terminal repeats (direct and inverted) and trimming the sequences accordingly (sequence without repeats are trimmed on their coding sequences); (5) by clusterizing the data set of 7,461 elements that have 90% identity over 90% of its length to obtain 5,522 clusters of elements, then (6) comparing the consensus sequences by BLAST to several databases and (7) finally running a program to classify these elements. The obtained sequences were compared to the genome to identify the number of bases occupied by this representative set.

**Supplementary Table 15. Summary of fluorescent *in situ* hybridization (FISH) to *Ixodes scapularis* ISE18 cell line chromosome spreads using BAC clone probes.** Probes included only fully sequenced and assembled BAC clones from the 10X BAC clone library. D=Dispersed signal; S=Specific signal; I=Inconsistent result.

| Genbank<br>Accession | BAC<br>Size(bp) | 10X BAC<br>Library<br>Plate/Well | FISH<br>Result |
|----------------------|-----------------|----------------------------------|----------------|
| AC192414             | 117688          | 5/A1                             | D              |
| AC192415             | 122081          | 33/A1                            | D              |
| AC192416             | 107486          | 36/A1                            | D              |
| AC192417             | 102815          | 40/A1                            | D              |
| AC192418             | 114701          | 41/A1                            | D              |
| AC192419             | 113880          | 43/A1                            | D              |
| AC192420             | 146997          | 45/A1                            | D              |
| AC192421             | 137443          | 49/A1                            | D              |
| AC192422             | 135954          | 51/A1                            | D              |
| AC192423             | 109798          | 53/A1                            | D              |
| AC192424             | 144952          | 55/A1                            | D              |
| AC192425             | 145957          | 60/A1                            | D              |
| AC192426             | 117608          | 64/A1                            | S              |
| AC192427             | 98661           | 66/A1                            | D              |
| AC192428             | 106828          | 67/A1                            | D              |
| AC192429             | 136633          | 68/A1                            | D              |
| AC192742             | 133074          | 48/A1                            | D              |
| AC192743             | 130937          | 54/A1                            | D              |
| AC192744             | 115169          | 61/A1                            | D              |
| AC200531             | 77162           | 2/A1                             | D              |
| AC205630             | 95257           | 1/F14                            | D              |
| AC205631             | 108628          | 1/P2                             | D              |
| AC205632             | 26509           | 3/K2                             | I              |
| AC205633             | 97628           | 3/P2                             | I              |
| AC205634             | 112417          | 6/P2                             | S              |
| AC205635             | 104824          | 11/P2                            | D              |
| AC205636             | 106471          | 12/P2                            | D              |
| AC205637             | 131925          | 14/C7                            | D              |
| AC205638             | 100378          | 15/P2                            | D              |
| AC205639             | 92483           | 16/P2                            | D              |
| AC205640             | 109665          | 22/P2                            | I              |
| AC205641             | 179341          | 24/P2                            | D              |
| AC205642             | 110473          | 27/P2                            | S              |
| AC205643             | 128247          | 31/P2                            | D              |
| AC205644             | 110010          | 37/P2                            | D              |
| AC205645             | 120505          | 41/M8                            | D              |
| AC205646             | 122242          | 42/P2                            | D              |
| AC205647             | 115710          | 43/E15                           | D              |
| AC205648             | 126704          | 44/P2                            | D              |
| AC205649             | 111949          | 47/P2                            | D              |
| AC205650             | 107316          | 56/P2                            | D              |

|          |        |       |   |
|----------|--------|-------|---|
| AC205651 | 172110 | 58/P2 | D |
| AC205652 | 50437  | 62/P2 | D |
| AC205653 | 108041 | 63/P2 | D |
| AC205654 | 14567  | 69/P2 | I |

---

**Supplementary Table 16. Summary of protein domains identified in *Ixodes scapularis* sialome sequences.**

| Group No. <sup>a</sup> | Group Name                          | Mol. Wt. (kDa) | Proposed Gene No. <sup>b</sup> | <i>Is</i> | <i>Hs</i> | <i>Bt</i> | <i>Gg</i> | <i>Aa</i> | <i>Cq</i> | <i>Ag</i> | <i>Dm</i> | <i>Ce</i> | <i>At</i> | Function <sup>c</sup>                   |
|------------------------|-------------------------------------|----------------|--------------------------------|-----------|-----------|-----------|-----------|-----------|-----------|-----------|-----------|-----------|-----------|-----------------------------------------|
| 3                      | Kunitz domain-containing peptides   | Multiples of 8 | 30                             | 74        | 26        | 28        | 7         | 5         | 5         | 4         | 30        | 57        | 0         | Anti-clotting                           |
| 13b                    | Selenoproteins                      | 15             | 3                              | 2         | 4         | 2         | 1         | 1         | 1         | 1         | 1         | 1         | 1         | Presumed antioxidant                    |
| 13b                    | Alkyl hydroperoxide reductase       | 28             | 3                              | 6         | 23        | 8         | 5         | 6         | 6         | 6         | 10        | 4         | 11        | Detoxification                          |
| 8                      | Metalloproteases                    | 55             | 3                              | 34        | 108       | 71        | 38        | 9         | 14        | 10        | 19        | 8         | 0         | Fibrinolytic                            |
| 25b                    | Dipeptidyl peptidase                | 60             | 2                              | 7         | 7         | 8         | 3         | 9         | 8         | 10        | 7         | 1         | 0         | Kininase                                |
| 12b                    | Defensin                            | 6              | 2                              | 8         | 13        | 29        | 12        | 4         | 1         | 2         | 1         | 0         | 0         | Immunity                                |
| 17b                    | Cystatin                            | 14             | 2                              | 13        | 30        | 23        | 9         | 2         | 0         | 0         | 4         | 3         | 11        | antiinflammatory, immunosuppressor      |
| 17c                    | Serpin                              | 24             | 2                              | 44        | 115       | 80        | 31        | 32        | 48        | 25        | 44        | 11        | 12        | Serine protease inhibitor               |
| 25a                    | Serine proteases                    | Various        | 2                              | 133       | 293       | 154       | 77        | 392       | 448       | 321       | 283       | 12        | 0         | Specificity unknown                     |
| 17a                    | TIL domain peptide                  | 11             | 2                              | 23        | 16        | 7         | 15        | 23        | 13        | 23        | 11        | 29        | 0         | Unknown                                 |
| 25c                    | Phospholipase A2                    | Truncated      | 1                              | 2         | 2         | 2         | 2         | 5         | 1         | 1         | 1         | 0         | 0         | Specificity unknown                     |
| 13a                    | Glutathione peroxidase              | 25             | 1                              | 8         | 15        | 7         | 4         | 3         | 4         | 5         | 4         | 10        | 8         | Presumed antioxidant                    |
| 26b                    | Antigen 5                           | 35             | 1                              | 12        | 38        | 13        | 11        | 35        | 30        | 19        | 22        | 34        | 22        | Unknown                                 |
| 26a                    | Ixoderin                            | 30             | 1                              | 27        | 61        | 26        | 34        | 35        | 92        | 49        | 22        | 7         | 0         | Immunity                                |
| 12a                    | GGY repeat family <sup>d</sup>      | 4.7-13         | Various families               |           |           |           |           |           |           |           |           |           |           | Unknown, possibly antimicrobial         |
| 18                     | Mucins <sup>e</sup>                 | Various        | Various families               |           |           |           |           |           |           |           |           |           |           | Unknown                                 |
| 10                     | Ixostatin                           | 9-11           | 25                             | 11        |           |           |           |           |           |           |           |           |           | unknown                                 |
| 15                     | WC-10 family                        | 9-11           | 21                             | 4         |           |           |           |           |           |           |           |           |           | Unknown                                 |
| 11                     | Lipocalins                          | 18-24          | 20                             | 40        |           |           |           |           |           |           |           |           |           | Kratagonist                             |
| 16                     | LPTS family                         | 12-16          | 11                             | 0         |           |           |           |           |           |           |           |           |           | Unknown                                 |
| 4                      | Proline/Glycine rich peptides       | 6-8            | 10                             | 24        |           |           |           |           |           |           |           |           |           | Unknown                                 |
| 7                      | 9 and 7 kDa family                  | 7-9            | 10                             | 12        |           |           |           |           |           |           |           |           |           | Unknown                                 |
| 6                      | 5.3 kDa family                      | 5.3            | 9                              | 6         |           |           |           |           |           |           |           |           |           | Antimicrobial                           |
| 1                      | Basic tail polypeptides             | 13-14          | 8                              | 16        |           |           |           |           |           |           |           |           |           | Anti-clotting                           |
| 9                      | Ixodegrin (RGD containing peptides) | <4             | 5                              | 10        |           |           |           |           |           |           |           |           |           | Probable platelet aggregation inhibitor |

|     |                                      |       |   |                           |                 |
|-----|--------------------------------------|-------|---|---------------------------|-----------------|
| 14  | Anticlonplement<br>Isac              | 16    | 4 | 1                         | Anticlonplement |
| 19  | IS6 family                           | 9-12  | 4 | 2                         | Unknown         |
| 2   | Basic tailless<br>polypeptides       | 10-11 | 3 | included<br>in group<br>1 | Unknown         |
| 20  | 12 kDa family                        | 12    | 3 | 2                         | Unknown         |
| 5   | 18.7 kDa family                      | 19    | 2 | 4                         | Unknown         |
| 12c | Microplusin                          | 13    | 2 | 15                        | Antimicrobial   |
| 21  | 26 kDa family                        | 26    | 2 | 2                         | Unknown         |
| 23  | Toxin like, may be<br>related to IS6 | 8-9   | 2 | 1                         | Unknown         |
| 24  | SRAEL family                         | 16-22 | 2 | 2                         | Unknown         |
| 25d | Small ribonuclease                   | 6     | 1 | 1                         | Unknown         |
| 22  | 30 kDa family                        | 30    | 1 | 20                        | Unknown         |

<sup>a</sup>Based on<sup>64</sup>. The supplemental table can be obtained from [http://exon.niaid.nih.gov/transcriptome/lx\\_scapularis\\_sialome\\_2005/Sup-tables/Sup-table-2.xls](http://exon.niaid.nih.gov/transcriptome/lx_scapularis_sialome_2005/Sup-tables/Sup-table-2.xls).

<sup>b</sup>Proteins that are >90% divergent in amino acid sequence.

<sup>c</sup>Based on at least one member of a protein family that has been functionally analyzed.

<sup>d</sup>Heterogeneous family, with poor primary sequence conservation, but having GGY repeats.

<sup>e</sup>Heterogeneous family having in common solely over 10 N-acetyl-galactosylation sites.

*Aa*, *Aedes aegypti*; *Ag*, *Anopheles gambiae*; *At*, *Arabidopsis thaliana*; *Bt*, *Bos taurus*; *Ce*, *Caenorhabditis elegans*; *Cq*, *Culex quinquefasciatus*; *Dm*, *Drosophila melanogaster*; *Gg*, *Gallus gallus*; *Hs*, *Homo sapiens*; *Is*, *Ixodes scapularis*.

**Supplementary Table 17. List of putative immune-related genes identified in the *Ixodes scapularis* genome.**

| Immune pathway and gene | Gene description                                 | <i>I. scapularis</i> supercontig # | Base pair range on supercontig  | Genbank accession #      |
|-------------------------|--------------------------------------------------|------------------------------------|---------------------------------|--------------------------|
| <b>Toll Pathway</b>     |                                                  |                                    |                                 |                          |
| Dorsal                  | Embryonic polarity dorsal                        | DS612897                           | 344,672-368,433                 | ISCW000140               |
| Cactus                  | NF-kappaB inhibitor IkappaB                      | DS807313<br>DS789268               | 89,019-110,525<br>14,144-34,799 | ISCW019520<br>ISCW007030 |
| Pelle                   | serine-threonine protein kinase                  | DS633730                           | 60,689-76,958                   | ISCW001463               |
| Tube                    | cyclin T-dependent kinase CDK9                   | DS787602                           | 500,517-518,860                 | ISCW007160               |
| MyD88                   | myd88                                            | DS831454                           | 19,812-43,217                   | ISCW008802               |
| Toll                    | toll                                             | DS894332                           | 370,864-378,206                 | ISCW022740               |
|                         | toll                                             | DS795254                           | 164,145-173,413                 | ISCW007727               |
|                         | toll                                             | DS692880                           | 318,809-322,642                 | ISCW018193               |
|                         | toll                                             | DS863226                           | 213,685-217,374                 | ISCW020989               |
|                         | toll                                             | DS795254                           | 116,582-121,636                 | ISCW007724               |
|                         | toll                                             | DS725696                           | 4,704-5,021                     | ISCW017724*              |
|                         | toll                                             | DS795254                           | 130,237-135,616                 | ISCW007726**             |
|                         | toll                                             | DS695149                           | 145,084-147,147                 | ISCW004495**             |
|                         | toll                                             | DS794567                           | 257,906-260,571                 | ISCW008289**             |
|                         | toll                                             | DS851201                           | 446,328-461,671                 | ISCW020221**             |
| Spätzle                 | spatzle alternatively spliced isoform 11.27      | DS924847                           | 58,310-78,232                   | ISCW022569               |
|                         | Sptzle 1B                                        | DS915052                           | 406,105-422,910                 | ISCW022732               |
| <b>Imd pathway</b>      |                                                  |                                    |                                 |                          |
| Caudal                  | homeobox protein cdx                             | DS839652                           | 4,771-4,947                     | ISCW008954               |
| Relish                  | nuclear factor nf-kappa-B P105 subunit           | DS737890                           | 107,162-147,186                 | ISCW018935               |
| IKK gamma               | protein kinase                                   | DS711115                           | 74,892-92,974                   | ISCW003529               |
| IKK beta                | inhibitor of nuclear factor kappa-B kinase alpha | DS684865                           | 34,555-75,124                   | ISCW002130               |
| TAK1                    | tak1                                             | DS956364                           | 46,654-69,194                   | ISCW023496               |
| TAB2                    | conserved hypothetical protein                   | DS831661                           | 125,422-146,802                 | ISCW009346               |
| POSH                    | conserved hypothetical protein                   | DS980186                           | 71,040-94,158                   | ISCW015192               |
| Caspar                  | regulator of the ubiquitin pathway               | DS635599                           | 608,153-631,045                 | ISCW015648               |

|          |                                        |          |                 |            |
|----------|----------------------------------------|----------|-----------------|------------|
| Effete   | ubiquitin protein ligase               | DS734834 | 71,859-74,198   | ISCW018551 |
| Bendless | ubiquitin protein ligase               | DS734517 | 102,190-115,886 | ISCW006743 |
| Uev1a    | ubiquitin-conjugating enzyme           | DS755574 | 226,269-228,921 | ISCW019147 |
| IAP2     | inhibitor of apoptosis protein 1 and 2 | DS874571 | 17,481-47,594   | ISCW010694 |

---

#### RNAi pathway

|           |                                  |          |                 |            |
|-----------|----------------------------------|----------|-----------------|------------|
| Dicer     | dicer-1                          | DS643033 | 158,526-187,719 | ISCW000889 |
|           | dicer-1                          | DS643033 | 191,838-226,069 | ISCW000890 |
| Argonaute | translation initiation factor 2C | DS620030 | 375,533-385,847 | ISCW015916 |
|           |                                  | DS879840 | 1,146-17,131    | ISCW011768 |
|           |                                  | DS903494 | 161,089-164,329 | ISCW022696 |
|           |                                  | DS887784 | 612,740-615,223 | ISCW021130 |
|           |                                  | DS906490 | 52,601-76,044   | ISCW013378 |
| FMRP      | HyFMR                            | DS662130 | 57,130-96,383   | ISCW002912 |
| VIG       | vasa intronic gene               | DS630348 | 7,046-19,031    | ISCW000538 |
| Tudor-SN  | 4SNC-Tudor domain protein        | DS947409 | 53,618-100,428  | ISCW014289 |
| Armitage  | Conserved hypothetical protein   | DS771975 | 54,521-70,842   | ISCW019555 |
| Aubergine | Cniwi protein                    | DS692353 | 8,438-10,987    | ISCW004464 |
|           | Cniwi protein                    | DS861388 | 229,689-253,854 | ISCW011373 |
| Rm62      | ATP-dependent RNA helicase       | DS668332 | 17-18,383       | ISCW002701 |
|           |                                  | DS668332 | 27,837-64,710   | ISCW002703 |
|           |                                  | DS819551 | 52,974-68,087   | ISCW009472 |

---

#### JAK/STAT pathway

|                         |                                        |          |                 |            |
|-------------------------|----------------------------------------|----------|-----------------|------------|
| JAK (Hopscotch)         | Tyrosine protein kinase                | DS636921 | 613,020-649,592 | ISCW016158 |
| STAT                    | Stat3                                  | DS736534 | 85,785-110,372  | ISCW005692 |
| JAK receptor (Domeless) | Receptor protein tyrosine phosphatase  | DS672509 | 132,429-173,396 | ISCW016699 |
| PIAS                    | Sumo ligase                            | DS741077 | 191,455-212,512 | ISCW005295 |
| SOCS                    | SOCS box SH2 domain-containing protein | DS788896 | 252,388-253,269 | ISCW019435 |

|                                             |                                  |          |                 |            |
|---------------------------------------------|----------------------------------|----------|-----------------|------------|
| <b>Other immune-related genes</b>           |                                  |          |                 |            |
| Akirin                                      | Protective antigen D48/subolesin | DS936446 | 66,643-89,471   | ISCW023283 |
| Antimicrobial peptides (AMPs)***            | AMP                              |          | 7,539-10,842    | ISCW005927 |
|                                             | AMP                              | DS766801 | 10,615-12,036   | ISCW011162 |
|                                             | scapularisin                     | DS858447 | 805-4,569       | ISCW005926 |
|                                             | secreted salivary gland peptide  | DS766801 | 37,932-40,936   | ISCW005928 |
|                                             | microplusin                      |          |                 |            |
|                                             | preprotein                       | DS700881 | 37,354-41,025   | ISCW004019 |
| Caspases****                                | microplusin                      | DS683675 | 11,851-16,401   | ISCW002113 |
|                                             | preprotein                       |          |                 |            |
|                                             | caspase                          | DS689930 | 4,952-18,616    | ISCW003039 |
|                                             | caspase                          | DS923722 | 42,757-57,807   | ISCW013172 |
|                                             | caspase                          | DS980848 | 29,397-36,907   | ISCW015329 |
| Defensins                                   | caspase                          | DS896168 | 55,609-67,445   | ISCW022545 |
|                                             | preprodefensin                   | DS759251 | 1,299-2,130     | ISCW024381 |
|                                             | preprodefensin                   | DS664851 | 77,757-80,159   | ISCW016747 |
|                                             | preprodefensin                   | DS929532 | 1,258-2,470     | ISCW022594 |
|                                             | preprodefensin                   | DS633368 | 480-1,253       | ISCW024015 |
| Duox                                        | defensin                         | DS930883 | 134,844-141,980 | ISCW022102 |
|                                             | dual oxidase 1                   | DS798980 | 38,754-135,685  | ISCW007865 |
|                                             | ixoderin precursor               | DS662660 | 9,473-15,818    | ISCW002664 |
|                                             | ixoderin precursor               | DS929502 | 1,407-13,639    | ISCW012248 |
|                                             | ixoderin precursor               | DS959741 | 7,679-17,815    | ISCW013746 |
| Fibrinogen-related proteins                 | ixoderin precursor               | DS860650 | 948-6,195       | ISCW024686 |
|                                             | ixoderin precursor               | DS899572 | 85,691-93,595   | ISCW022063 |
|                                             | lysozyme                         | DS613145 | 77,141-77,891   | ISCW001646 |
|                                             | lysozyme                         | DS613145 | 47,267-56,398   | ISCW001645 |
|                                             | lysozyme                         | DS844216 | 51,691-65,539   | ISCW020680 |
| Lysozymes                                   | C-type lysozyme                  | DS670557 | 67,058-72,249   | ISCW017129 |
|                                             | NADPH oxidase                    | DS690902 | 246,606-271,833 | ISCW002630 |
|                                             | NADPH oxidase                    |          |                 |            |
|                                             | NADPH oxidase                    |          |                 |            |
| Peptidoglycan Recognition Receptors (PGRPs) | PGRP                             | DS686855 | 766-1,809       | ISCW024175 |
|                                             | Ammonium transporter             | DS861599 | 1-805           | ISCW024689 |
|                                             | PGRP                             | DS697694 | 122,963-124,835 | ISCW004389 |
|                                             | PGRP                             | DS904186 | 380,517-387,075 | ISCW022212 |
|                                             | PGRP                             |          |                 |            |
| Thio-ester containing proteins (TEPs)       | TEP                              |          |                 |            |
|                                             | alpha-2                          | DS837598 | 3,653-100,934   | ISCW020822 |
|                                             | macroglobulin                    | DS790028 | 75,581-99,146   | ISCW019887 |
|                                             | alpha-2                          | DS970697 | 293,496-343,165 | ISCW023777 |
|                                             | macroglobulin                    | DS716413 | 7,286-62,557    | ISCW003923 |
|                                             | alpha-2                          | DS687147 | 35,629-71,042   | ISCW003089 |
|                                             | macroglobulin conserved          | DS779097 | 53,866-97,786   | ISCW007141 |

hypothetical protein  
alpha-2  
macroglobulin

---

\* Sequence only shows the Toll/Interleukin-1 receptor domain (TIR) but no leucine-rich repeats (LRRs).

\*\* Sequence only shows LRRs but no TIR domain.

\*\*\* AMPs include all the sequences uncovered as AMPs but that were not annotated as “defensins”.

\*\*\*\* These sequences represent caspases that share similarity with death related ced-3/Nedd2-like protein (Dredd caspase).

**Supplementary Table 18. Genes in the *Ixodes scapularis* genome with similarity to the enzymes involved in the mevalonate/farnesyl PP and JH pathways in insects.**

| Enzyme                               | Scaffold<br>(bp range)      | VectorBase<br>Accession | Top BLAST result                                     |                                |
|--------------------------------------|-----------------------------|-------------------------|------------------------------------------------------|--------------------------------|
|                                      |                             |                         | Organism<br>(GenBank Accession)                      | e-value<br>Amino Acid Identity |
| <b><u>Farnesyl-PP pathway</u></b>    |                             |                         |                                                      |                                |
| Acetoacetyl-CoA thiolase             | DS624476<br>(15968-41821)   | ISCW016117              | <i>Dendroctonus ponderosae</i><br>(AFI45001)         | 4e-170<br>(61%)                |
| HMG-S <sup>a</sup>                   | DS690902<br>(31998-46779)   | ISCW002615              | <i>Nasonia vitripennis</i><br>(XP_003426942)         | 9e-169<br>(68%)                |
| HMG-R <sup>b</sup>                   | DS842351<br>(4797-71147)    | ISCW009466              | <i>Pediculus humanus corporis</i><br>(XP_002428525)  | 0.0<br>(55%)                   |
| Mevalonate kinase                    | DS735207<br>(298570-308399) | ISCW018716              | <i>Camponotus floridanus</i><br>(EFN64406)           | 4e-60<br>(35%)                 |
| Phosphomevalonate kinase             | DS881578<br>(239893-241993) | ISCW021370              | <i>Acromyrmex echinator</i><br>(EGI169273)           | 1e-44<br>(42%)                 |
| Diphosphomevalonate decarboxylase    | DS921134<br>(457048-474172) | ISCW022273              | <i>Apis mellifera</i><br>(XP_001121619)              | 7e-122<br>(51%)                |
| Isopentenyl diphosphate isomerase    | not found                   | not found               | not found                                            | not found                      |
| Geranyl diphosphate synthase         | not found                   | not found               | not found                                            | not found                      |
| Farnesyl diphosphate synthase        | DS834911<br>(53770-59211)   | ISCW009264              | <i>Dendroctonus jeffreyi</i><br>(AAX78435)           | 2e-96<br>(47%)                 |
| <b><u>JH Pathway</u></b>             |                             |                         |                                                      |                                |
| Farnesyl diphosphate pyrophosphatase | not found                   | not found               | not found                                            | not found                      |
| Farnesol oxidase                     | DS838300<br>(597086-612073) | ISCW020246              | <i>Ceratosolen solmsi marchali</i><br>(XP_011505480) | 1e-99<br>(60%)                 |
| Farnesal dehydrogenase               | not found                   | not found               | not found                                            | not found                      |
| Methyltransferase                    | DS624614<br>(1302-5354)     | ISCW000145              | <i>Schistocerca gregaria</i><br>(ADV17350)           | 4e-18<br>(29%)                 |
| JH <sup>c</sup> epoxidase            | not found                   | not found               | not found                                            | not found                      |

<sup>a</sup> Hydroxymethylglutaryl-CoA synthase.

<sup>b</sup> Hydroxymethylglutaryl-CoA reductase.

<sup>c</sup> Juvenile hormone.

**Supplementary Table 19. Putative *Ixodes scapularis* genes associated with ecdysone synthesis and the ecdysone receptor.**

| Gene name                       | VectorBase<br>Accession | Scaffold | Coordinates on<br>Scaffold (bp) |
|---------------------------------|-------------------------|----------|---------------------------------|
| CYP307A1 ( <i>Spook</i> )       | ISCW024795              | DS931697 | 106..1604                       |
| CYP307B1 ( <i>SPOT</i> )        | ISCW006980              | DS782423 | 5612..12969                     |
| CYP307A2 ( <i>Spookier</i> )    | ND                      |          |                                 |
| CYP306A1 ( <i>Phantom</i> )     | ND                      |          |                                 |
| CYP302A1 ( <i>Disembodied</i> ) | ND                      |          |                                 |
| CYP315A1 ( <i>Shadow</i> )      | ISCW021866              | DS864024 | 44582..49687                    |
| CYP314A1 ( <i>Shade</i> )       | ISCW021011              | DS857608 | 115434..126481                  |
|                                 | ISCW001527              | DS638370 | 30627..62                       |
| Ecdysone receptor               | ISCW003147              | DS667471 | 104353..111170                  |

**Supplementary Table 20. Summary of *Ixodes scapularis* aminolevulinic acid (ALA) synthesis, proto-heme synthesis and heme degradation pathways.**

| Enzyme                                        | Gene                       | VectorBase Accession     | Scaffold             | Transcript Evidence GenBank Accession | Gene Identified in REIS |
|-----------------------------------------------|----------------------------|--------------------------|----------------------|---------------------------------------|-------------------------|
| ALA synthase<br>Aminolevulinic acid synthase  | <i>hemA</i>                | -                        | -                    | -                                     | +                       |
| Glutamyl-tRNA synthase <sup>†</sup>           | <i>gltX</i>                | ISCW018719               | DS735207             | Dv syn<br>YP_001857605.1              | +                       |
| Glutamyl-tRNA reductase                       | <i>gtrA/hemA</i>           | -                        | -                    | Dv ov<br>YP_002306262.1               | -                       |
| Glutamate-1-semialdehyde 2,1-aminotransferase | <i>hemL</i>                | -                        | -                    | -                                     | +                       |
| Aminolevulinic acid dehydratase               | <i>hemB</i>                | -                        | -                    | -                                     | +                       |
| Porphobilinogen deaminase                     | <i>hemC</i>                | -                        | -                    | -                                     | +                       |
| Uroporphyrinogen-III synthase                 | <i>hemD</i>                | -                        | -                    | -                                     | +                       |
| Uroporphyrinogen decarboxylase                | <i>hemE</i>                | -                        | -                    | -                                     | +                       |
| Corprophyrinogen III oxidase                  | <i>hemF</i>                | ISCW010977<br>ISCW006377 | DS891848<br>DS752864 | -<br>-                                | +                       |
| Protoporphyrinogen IX oxidase                 | <i>hemN</i><br><i>hemG</i> | -<br>ISCW023396          | -<br>DS626813        | -<br>Is syn<br>NP_001167359           | +                       |
| Ferrochelatase                                | <i>hemY</i><br><i>hemH</i> | -<br>ISCW016187          | -<br>DS626813        | -<br>Dv syn<br>ZP_03286863.1          | -<br>+                  |
| Heme oxygenase                                | <i>hemO</i>                | -                        | -                    | Is syn<br>XP_002711461                | -                       |
| Biliverdin reductase                          | -                          | -                        | --                   | -                                     | -                       |
| Protoheme IX farnesyl transferase             | <i>cyoE</i>                | ISCW008907               | DS846584             | Ot syn<br>XP_002411071.1              | -                       |

ALA,  $\delta$ -aminolevulinic acid; REIS, *Rickettsia* endosymbiont of *Ixodes scapularis*<sup>10</sup>; syn, syngalnglion transcriptome; ov, ovary transcriptome, Dv, *Dermacentor variabilis*; Is, *I. scapularis*; Ot, *Ornithodoros turicata*; <sup>†</sup>peptide evidence (see supplemental text).

**Supplementary Table 21. List of *Ixodes scapularis* hemoglobin digesting genes and gene annotations<sup>1</sup>**

| Function                      | Gene name                                     | Vector base accession no. | Scaffold  | Scaffold coordinates (bp) | Gene length (bp) | Transcript Length (bp) | Length (AA) | No. Exons |
|-------------------------------|-----------------------------------------------|---------------------------|-----------|---------------------------|------------------|------------------------|-------------|-----------|
| Primary hemoglobin cleavage   | Cathepsin D (Aspartic protease)               | IscW_ISCW023880           | DS949737  | 152,273-190,227           | 37954            | 1179                   | 392         | 1         |
|                               |                                               | IscW_ISCW013185           | DS900056: | 10,899-23,895             | 12,996           | 963                    | 320         | 8         |
|                               |                                               | IscW_ISCW003823           | DS722875: | 17,354-32,869             | 15,515           | 1100                   | 345         | 6         |
|                               | Cathepsin L (Cysteine protease endopeptidase) | IscW_ISCW024899           | DS970886  | 4,733-5,116               | 5313             | 383                    | 127         | 1         |
|                               | Cathepsin L (Cysteine protease endopeptidase) | IscW_ISCW000076           | DS629804  | 3,735-4,818               | 1,083            | 300                    | 99          | 2         |
|                               | Legumain (Aspartic endopeptidase)             | IscW_ISCW015983           | DS621767  | 1,225-3,192               | 14,974           | 1968                   | 446         | 1         |
| Secondary hemoglobin cleavage | Cathepsin B (Endopeptidase)                   | IscW_ISCW005981           | DS754946  | 9,428-18,454              | 9,026            | 672                    | 223         | 5         |
|                               | Cathepsin L (Cysteine protease endopeptidase) | IscW_ISCW024899           | DS970886  | 4,733-5,116               | 5313             | 383                    | 127         | 1         |
|                               |                                               | IscW_ISCW024213           | DS704563  | 4,637-6,606               | 9464             | 255                    | 84          | 1         |
| Tertiary hemoglobin cleavage  | Cathepsin C (Aminodipeptidase)                | IscW_ISCW003494           | DS694733  | 169,868-186,056           | 16,188           | 1,080                  | 352         | 7         |
|                               | Cathepsin B (Endopeptidase)                   | IscW_ISCW005981           | DS754946  | 9,428-18,454              | 9,026            | 672                    | 223         | 5         |
| Final hemoglobin cleavage     | SCP (Serine carboxypeptidase)                 | IscW_ISCW021184           | DS88627   | 64,978-83,896             | 18,918           | 1705                   | 473         | 4         |
|                               |                                               | IscW_ISCW006427           | DS752045  | 233-3,375                 | 3,142            | 1125                   | 374         | 2         |
|                               |                                               | IscW_ISCW010371           | DS886430  | 77,615-100,122            | 22,507           | 1431                   | 476         | 6         |
|                               |                                               | IscW_ISCW007492           | DS725233  | 346-7,634                 | 7,288            | 1416                   | 471         | 4         |
|                               | LAP (Leucine aminopeptidase)                  | IscW_ISCW0023735          | DS967246  | 117,498-141,675           | 24,177           | 1590                   | 529         | 11        |

<sup>1</sup>Legend: Hemoglobin is digested intracellularly in specialized lysosome (hemosomes, see Fig. 1D). The digestive pathway comprises four major cleavage processes. 1) Primary digestion of the globin moieties into large fragments by the aspartic proteases Cathepsin D and legumain, supported by the cysteine endopeptidase Cathepsin L; 2) digestion of the resulting large peptide fragments (8 -11 kDa) by the endopeptidases Cathepsin B and Cathepsin L, resulting in intermediate size fragments (~ 5 – 7 kDa); 3) digestion of the intermediate size fragments by Cathepsin C and B resulting in small fragments (~ 3 – 5 kDa); 4) digestion of the small peptide fragments by SCP and LAP, liberating free amino acids and dipeptides. Free heme resulting from hemoglobinase activity is inactivated by forming hematin-like aggregates that accumulate inside the hemosomes<sup>123</sup>.

**Supplementary Table 22. Summary of *Ixodes scapularis* hemelipoglyco-carrier protein (CP) and vitellogenin (Vg) gene annotations.**

| <i>I. scapularis</i><br>Gene               | VectorBase<br>Accession | Scaffold | Scaffold<br>Coordinates<br>(bp) | Length<br>(bp) | Length<br>(AA) | No.<br>Exons |
|--------------------------------------------|-------------------------|----------|---------------------------------|----------------|----------------|--------------|
| <b>Hemelipoglyco-carrier Protein Genes</b> |                         |          |                                 |                |                |              |
| CP 1                                       | ISCW021709              | DS853155 | 640,093-674,357                 | 4,934          | 1,556          | 25           |
| CP 2 <sup>†</sup>                          | ISCW014675              | DS946795 | 23,797-86,142                   | 4,554          | 1,517          | 24           |
| CP 3 <sup>†</sup>                          | ISCW021710              | DS853155 | 687,061-748,951                 | 3,990          | 1,329          | 22           |
| CP 4 <sup>†</sup>                          | ISCW012424              | DS930868 | 97,596-131,023                  | 3,978          | 1,325          | 20           |
| CP 5 <sup>†</sup>                          | ISCW012423              | DS930868 | 45,085-91,058                   | 3,336          | 1,111          | 19           |
| CP 6 <sup>†</sup>                          | ISCW021704              | DS853155 | 567,881-571,678                 | 1,440          | 480            | 8            |
| CP 7 <sup>†</sup>                          | ISCW021707              | DS853155 | 617,028-622,418                 | 845            | 265            | 4            |
| CP 8 <sup>†</sup>                          | ISCW021706              | DS853155 | 567,881-571,678                 | 460            | 153            | 3            |
| CP 9 <sup>†</sup>                          | ISCW021705              | DS853155 | 605,937-607,255                 | 425            | 141            | 2            |
| CP 10 <sup>†</sup>                         | ISCW024299              | DS725419 | 389-1,716                       | 354            | 117            | 2            |
| <b>Vitellogenin Protein Genes</b>          |                         |          |                                 |                |                |              |
| Vg 1                                       | ISCW013727              | DS950603 | 16,225-44,518                   | 4,935          | 1,644          | 26           |
| Vg 2                                       | ISCW021228              | DS874548 | 255,397-286,108                 | 5,811          | 1,936          | 22           |

<sup>†</sup>Incomplete gene model.

**Supplementary Table 23. Putative cytochrome P450 genes in *Ixodes scapularis* genome.**

| CYP2 Clan <sup>a</sup> | VB Accession <sup>b</sup> | CYP3 Clan   | VB Accession              | CYP4 Clan           | VB Accession                       |
|------------------------|---------------------------|-------------|---------------------------|---------------------|------------------------------------|
| CYP18C1                | ISCW009830                | CYP41A2     | ISCW022948                | CYP4W2              | ISCW024589,<br>ISCW024427          |
| CYP307A1               | ISCW006980,<br>ISCW024795 | CYP41B1     | ISCW022672                | CYP4W2-<br>de10b11b | ABJB010319121                      |
| CYP3001A1              | ISCW002226                | CYP41C1     | ISCW022945                |                     |                                    |
| CYP3001A2              | ISCW008379                | CYP41C2     | ISCW022947                | CYP4W3              | ISCW003279                         |
| CYP3001A3              | ISCW003457                | CYP41C3     | ISCW019880                | CYP4W4              | ISCW022701,<br>ISCW022702          |
| CYP3001A4              | ISCW004522                | CYP41C4     | EW786235.1,<br>EW899917.1 | CYP4W5              | ABJB010639789.1                    |
| CYP3001A5              | ABJB010183741.1           | CYP41C5     | ISCW019198                | CYP4W6              | ISCW013762                         |
| CYP3001A6              | ABJB010948131.1           | CYP41C6v1   | ISCW024627                | CYP4W7              | ISCW017084                         |
| CYP3001A7              | ABJB010161347.1           | CYP41C6v2   | ISCW011029                | CYP4DL1             | ISCW022695                         |
| CYP3001B1              | ISCW016425                | CYP41C7     | ISCW022987                | CYP4DL2             | ISCW022697                         |
| CYP3001B2              | EW827166.1,<br>EW827167.1 | CYP41C8     | ISCW024413                | CYP4DL3P            | ABJB010866300.1                    |
| CYP3001B3              | ISCW006203                | CYP41C9     | ISCW000510                | CYP4DL4             | ISCW007225                         |
| CYP3001B4              | ISCW006204                | CYP41C10    | ISCW010134,<br>ISCW024611 | CYP4DL4-<br>de3b    | ABJB011028851                      |
| CYP3001B5              | ISCW004521                | CYP41C11    | ISCW013318                | CYP4DL5             | EW922199.1                         |
| CYP3001B6              | ISCW002182                | CYP41C12    | ISCW007389                | CYP4DM1             | ISCW022693                         |
| CYP3001B7              | ISCW006219                | CYP41C13    | ISCW008554                | CYP4DN1             | ISCW024545                         |
| CYP3001B8              | ISCW016424                | CYP41C14    | ISCW002138                | CYP4DN2             | ISCW022708                         |
| CYP3001B9              | ABJB010987053.1           | CYP41C15    | ISCW003215                | CYP4DP1             | ISCW022706                         |
| CYP3001C1              | ISCW022449                | CYP41D1     | ISCW008571                | CYP4DP2             | ABJB010524713.1                    |
| CYP3001C2              | ISCW022451                | CYP3004A1   | ISCW018384                | CYP4DQ1             | DS865979,<br>DS895862,<br>DS714189 |
| CYP3001D1              | ISCW008112                | CYP3004A2   | ISCW018383                | CYP4DR1             | ISCW016620                         |
| CYP3001D2              | ISCW013045                | CYP3004A3   | EW879600.1                | CYP4DS1             | ISCW005615                         |
| CYP3001D3              | EW958870.1                | CYP3004A4   | EW959618.1                | CYP4DS2             | ISCW005544                         |
| CYP3001D4              | ISCW024917                | CYP3001B1   | ISCW016424                | CYP4DS3             | ABJB010393473.1                    |
| CYP3001D5              | ABJB010249968.1           | CYP3004C1v1 | ISCW022652                | CYP4DS4             | ISCW002003                         |
| CYP3001E1              | ISCW007349                | CYP3004C1v2 | EW883126.1                | CYP4DS5             | ISCW010787                         |
| CYP3001F1              | ISCW009779                | CYP3004C2   | ISCW022649                | CYP4DS6             | ISCW010786                         |
| CYP3001F2              | ISCW006867                | CYP3004C3P  | ISCW020210                | CYP4DS7             | ISCW010788                         |
| CYP3001G1              | ISCW006936                | CYP3004D1   | ISCW001306,<br>ISCW001307 | CYP4DS8             | ISCW019906                         |
| CYP3001G2              | ISCW022148                |             |                           | CYP4DS9             | ABJB010117553.1                    |
| CYP3001H1              | ISCW005196                | CYP3004D2   | ISCW002936                | CYP4DS10            | ISCW002005                         |
| CYP3001H2              | ABJB010355812.1           | CYP3005A1   | ISCW003160                | CYP4DT1             | ISCW016623                         |
| CYP3001J1              | ISCW002317                | CYP3005A2   | DS799461.1                | CYP319A3            | ISCW022705                         |
| CYP3001K1              | ISCW003266                | CYP3005A3   | ISCW004132                | CYP319A4            | DS764743                           |
| CYP3001L1              | ISCW023771,<br>ISCW006380 | CYP3005A4   | ISCW007953                | CYP319A5            | ISCW022704                         |
| CYP3001L2              | ISCW012594                | CYP3005A5   | ISCW007954                | CYP319A6v1          | EW883950.1                         |
| CYP3001L3              | ISCW018982                | CYP3005A6   | ISCW012000                | CYP319A6v2          | ISCW024808                         |
| CYP3001L4              | ISCW015950                | CYP3005A7   | ISCW011997                | CYP319A7            | ISCW022703                         |
| CYP3001M1              | ISCW017305                | CYP3005A8   | ISCW011996                |                     |                                    |
| CYP3001M2              | ISCW017964                | CYP3005A9   | ISCW024674                |                     |                                    |
| CYP3001M3              | ISCW017306                | CYP3005A10  | ISCW020282                | <b>Mito Clan</b>    |                                    |

|                |                           |              |                           |                   |                           |
|----------------|---------------------------|--------------|---------------------------|-------------------|---------------------------|
| CYP3001M4      | DS798591                  |              |                           | CYP302A1          | ISCW010580                |
| CYP3001N1      | ISCW007262                | CYP3005A11   | ISCW011028                | CYP3012A1v1       | ISCW001527                |
|                |                           |              | ISCW024197,               |                   |                           |
| CYP3001N2      | ISCW002062                | CYP3005A12   | ISCW008823                | CYP3012A1v2       | EW909080.1                |
| CYP3001N3      | EW887890.1,<br>EW855831.1 | CYP3005A13   | ISCW024701                | CYP3012A1v3       | ABJB010790473.1           |
| CYP3001N4      | ABJB010068877.1           | CYP3005A14   | ISCW001241                | CYP3012A1v4       | EW834608.1                |
| CYP3001P1      | ISCW015055                | CYP3005A15v1 | ISCW024274                | CYP3012A2         | ABJB010381557             |
| CYP3001P2      | ISCW015054                | CYP3005A15v2 | ISCW024583                | CYP3012A3         | EW961943.1                |
| CYP3001P3      | ISCW006806                | CYP3005A16   | ISCW014319                | CYP3012A4         | ISCW008267                |
| CYP3001Q1      | ISCW012310                | CYP3005A17   | ISCW007367                | CYP314A1          | ISCW021011                |
| CYP3001Q2      | ISCW009178                | CYP3005A18   | ISCW004905                | CYP315A1          | ISCW021866,<br>ISCW021867 |
|                |                           |              |                           | <b>CYP20 clan</b> |                           |
| CYP3001Q3v1    | ISCW014782                | CYP3005A19   | ISCW008019                |                   |                           |
| CYP3001Q3v2    | ABJB010212140.1           | CYP3005A20   | ISCW001104,<br>ISCW001105 |                   |                           |
| CYP3001R1      | ISCW016133                | CYP3005A21   | ISCW001103                | CYP20             | ISCW015973,<br>ISCW015974 |
| CYP3001R2      | ISCW005591                | CYP3006A1    | ISCW005198                |                   |                           |
| CYP3001S1      | ISCW014295                | CYP3006B1    | ISCW009640                |                   |                           |
| CYP3002A1      | ABJB010539647.1           | CYP3006C1    | ISCW012785                |                   |                           |
| CYP3002A2      | ISCW024473                | CYP3006D1    | ISCW014588                |                   |                           |
| CYP3003A1      | ISCW019785                | CYP3006E1    | ISCW001476                |                   |                           |
| CYP3003A2      | ISCW019784                | CYP3006F1    | ISCW001473                |                   |                           |
| CYP3003A3      | ISCW022069                | CYP3006G1    | ISCW007133                |                   |                           |
| CYP3003A4      | ISCW022070                | CYP3006G2    | ISCW007134                |                   |                           |
| CYP3003A5      | ISCW022071                | CYP3006G3    | EW786984.1,<br>EL516481   |                   |                           |
| CYP3003A5-de1b | ABJB010494977.1           | CYP3006G4    | ISCW001622                |                   |                           |
| CYP3003A6      | ISCW022073                | CYP3006G5    | ISCW016204,<br>ISCW016205 |                   |                           |
| CYP3003A7      | ISCW022075                |              |                           |                   |                           |
| CYP3003A8P     | ISCW022076                | CYP3006G6    | ISCW000235                |                   |                           |
| CYP3003A9      | ISCW022077                | CYP3006G7P   | DS949456.1                |                   |                           |
|                |                           | CYP3006H1    | ISCW001075                |                   |                           |
|                |                           | CYP3007A1    | ISCW017673                |                   |                           |
|                |                           | CYP3007A2    | EW793223.1,<br>EW875640.1 |                   |                           |
|                |                           | CYP3007A3    | ISCW014407                |                   |                           |
|                |                           | CYP3007A4    | ISCW000434                |                   |                           |
|                |                           | CYP3007A5    | EW886425.1                |                   |                           |
|                |                           | CYP3008A1v1  | DS711134.1                |                   |                           |
|                |                           | CYP3008A1v2  | ABJB010083687.1           |                   |                           |
|                |                           | CYP3008A1v3  | ABJB010429442.1           |                   |                           |
|                |                           | CYP3008A2    | ISCW003335                |                   |                           |
|                |                           | CYP3008A3    | ISCW010505                |                   |                           |
|                |                           | CYP3008B1    | DS884020                  |                   |                           |
|                |                           | CYP3009A1    | ISCW016385                |                   |                           |
|                |                           | CYP3009A2    | DS641118                  |                   |                           |
|                |                           | CYP3009A3    | ISCW016388                |                   |                           |
|                |                           | CYP3009A4    | DS641118                  |                   |                           |
|                |                           | CYP3009A5    | ISCW016389                |                   |                           |
|                |                           | CYP3009A6    | DS641118                  |                   |                           |

|                        |                           |
|------------------------|---------------------------|
| CYP3009A7              | DS641118                  |
| CYP3009A8              | ISCW016390                |
| CYP3009A9              | ISCW016392                |
| CYP3009A9-<br>de11b12b | DS641118                  |
| CYP3009A10             | ISCW016393                |
| CYP3009A10-<br>de6b    | DS641118                  |
| CYP3009A11             | DS641118                  |
| CYP3009A12             | ISCW015064                |
| CYP3009A13             | ISCW013158                |
| CYP3009A14             | ISCW007317                |
| CYP3009B1              | ISCW007380                |
| CYP3009B2              | ISCW011357                |
| CYP3009B3              | ISCW023575                |
| CYP3009C1              | ISCW016395                |
| CYP3009D1              | ISCW015040                |
| CYP3009D2v1            | ISCW015041                |
| CYP3009D2v2            | ISCW009986                |
| CYP3009D3              | ISCW003934                |
| CYP3009D4              | DS641118                  |
| CYP3009D5P             | DS641118                  |
| CYP3009D6              | ISCW016397                |
| CYP3009D7              | ISCW005328                |
| CYP3009D8              | EW899738.1,<br>EW899739.1 |
| CYP3010A1              | ISCW001418                |
| CYP3010B1              | ISCW010002,<br>ISCW010003 |
| CYP3011A1              | ISCW006560                |
| CYP3011A2v1            | EW797008.1,<br>EW883539.1 |
| CYP3011A2v2            | ISCW012810                |
| CYP3011A3              | ISCW009136                |

---

<sup>a</sup>The clans are higher level clades of genes. Ticks have five clans (including CYP20). The 2 clan has 68 entries with one possible allele (v2). P or -dexxx on the end of a name indicates a pseudogene. (de- indicates detritus exon adjacent to a parent gene, the numbers 10b11b etc indicate the exons that are present). The 2 clan has 2 pseudogenes, 1 variant and 65 genes. The 3 clan has 5 pseudogenes, 7 variants and 100 genes. The 4 clan has 3 pseudogenes, 1 variant and 33 genes. The mito clan has 3 variants and 7 genes. The 20 clan has only 1 gene. There are a total of 206 P450 genes. Halloween genes are (CYP302A1 [disembodied gene (dib)], CYP307A1 [spook (spo)], CYP314A1 [shade (shd)], CYP315A1 [shadow (sad)]). CYP18A1 in *Drosophila melanogaster* has 26 hydroxylase activity and is essential for metamorphosis<sup>185</sup>. <sup>b</sup>VectorBase accession numbers include ISCW gene model numbers if available, if there is no gene model, contig accessions ABB01XXXXXXXX.1 or scaffold accessions DSXXXXXX or ESTs EWXXXXXX.1 are given.

**Supplementary Table 24. Putative carboxylesterase genes Identified in the *Ixodes scapularis* genome**

| Classification                 | VectorBase<br>Accession<br>Number | Protein<br>Length <sup>†</sup> | <i>Ixodes<br/>scapularis</i><br>Scaffold | Base Pair Range on<br>Scaffold |
|--------------------------------|-----------------------------------|--------------------------------|------------------------------------------|--------------------------------|
| Carboxylesterase/<br>AChE-like | ISCW012483                        | 654                            | DS901690                                 | 148,125..169,517               |
|                                | ISCW007849 <sup>a</sup>           | 651                            | DS807640                                 | 41,806..55,016                 |
|                                | ISCW020835 <sup>a, b</sup>        | 647                            | DS812474                                 | 15,574..21,604                 |
|                                | ISCW020833 <sup>a</sup>           | 640                            | DS818569                                 | 257,240..263,338               |
|                                | ISCW011400 <sup>a</sup>           | 634                            | DS859680                                 | 251,048..253,591               |
|                                | ISCW011399 <sup>a</sup>           | 632                            | DS859680                                 | 183,448..185,998               |
|                                | ISCW012339 <sup>b, c</sup>        | 623                            | DS907147                                 | 57,074..98,844                 |
|                                | ISCW020830 <sup>a, b, c</sup>     | 620                            | DS818569                                 | 213,005..222,326               |
|                                | ISCW022870 <sup>b</sup>           | 617                            | DS903315                                 | 33,354..35,307                 |
|                                | ISCW001079                        | 592                            | DS638237                                 | 347,645..356,732               |
|                                | ISCW003637 <sup>b</sup>           | 586                            | DS727378                                 | 78,715..80,741                 |
|                                | ISCW005431 <sup>b</sup>           | 564                            | DS758735                                 | 7,074..13,075                  |
|                                | ISCW022246 <sup>b</sup>           | 558                            | DS921995                                 | 692,289..694,852               |
|                                | ISCW017638 <sup>b</sup>           | 557                            | DS717196                                 | 297,489..301,318               |
|                                | ISCW006617 <sup>b</sup>           | 556                            | DS737125                                 | 63,964..67,823                 |
|                                | ISCW020819 <sup>a</sup>           | 555                            | DS839663                                 | 26,717..48,021                 |
|                                | ISCW022251 <sup>a</sup>           | 547                            | DS921995                                 | 896,844..900,843               |
|                                | ISCW021541 <sup>a, c</sup>        | 542                            | DS889213                                 | 16,369..23,464                 |
|                                | ISCW022244 <sup>a</sup>           | 538                            | DS921995                                 | 665,765..669,060               |
|                                | ISCW013353                        | 534                            | DS904610                                 | 25,924..28,794                 |
|                                | ISCW020832 <sup>a</sup>           | 524                            | DS818569                                 | 238,942..245,039               |
|                                | ISCW020825 <sup>a, c</sup>        | 518                            | DS818569                                 | 60,968..62,524                 |
|                                | ISCW003278 <sup>c</sup>           | 517                            | DS685100                                 | 11,465..21,610                 |
|                                | ISCW001132 <sup>b</sup>           | 504                            | DS639501                                 | 286,801..288,315               |
|                                | ISCW001748 <sup>b</sup>           | 504                            | DS631740                                 | 5,492..7,006                   |
|                                | ISCW010310 <sup>b</sup>           | 500                            | DS819927                                 | 6,796..8,298                   |
|                                | ISCW020821 <sup>a, b</sup>        | 499                            | DS839663                                 | 94,462..97,065                 |
|                                | ISCW009205 <sup>b</sup>           | 499                            | DS828756                                 | 4,652..6,151                   |
|                                | ISCW006206 <sup>a, b</sup>        | 499                            | DS770580                                 | 30,210..38,997                 |
|                                | ISCW006896                        | 494                            | DS789758                                 | 5,982..7,560                   |
|                                | ISCW015340 <sup>b</sup>           | 493                            | DS976673                                 | 38,037..39,518                 |
|                                | ISCW004315 <sup>b</sup>           | 483                            | DS694420                                 | 58,222..59,673                 |
|                                | ISCW022252 <sup>a</sup>           | 481                            | DS921995                                 | 912,311..927,215               |
|                                | ISCW019926                        | 480                            | DS798293                                 | 1,550,582..1,572,844           |
|                                | ISCW024484                        | 471                            | DS773540                                 | 719..2,131                     |
|                                | ISCW024669                        | 467                            | DS867945                                 | 499..1,899                     |
|                                | ISCW007848 <sup>a</sup>           | 464                            | DS807640                                 | 28,185..29,576                 |
|                                | ISCW022036                        | 461                            | DS926387                                 | 907,297..921,121               |
|                                | ISCW024395                        | 460                            | DS750145                                 | 5,506..6,889                   |
|                                | ISCW002384 <sup>b</sup>           | 452                            | DS663061                                 | 396,472..397,830               |
|                                | ISCW010323                        | 432                            | DS833783                                 | 42,994..59,925                 |
|                                | ISCW006205 <sup>a</sup>           | 425                            | DS770580                                 | 425..4,231                     |
|                                | ISCW014784                        | 421                            | DS945247                                 | 9,272..12,166                  |
|                                | ISCW020826 <sup>a</sup>           | 413                            | DS818569                                 | 102,860..112,799               |
|                                | ISCW021542 <sup>a, c</sup>        | 388                            | DS889213                                 | 47,182..54,677                 |
|                                | ISCW007846 <sup>a</sup>           | 358                            | DS807640                                 | 11,151..12,224                 |
|                                | ISCW003776                        | 356                            | DS731177                                 | 27,172..46,710                 |
|                                | ISCW022253 <sup>a</sup>           | 354                            | DS921995                                 | 933,635..943,599               |
|                                | ISCW020829 <sup>a</sup>           | 348                            | DS818569                                 | 133,597..151,342               |

|                                          |                         |     |          |                      |
|------------------------------------------|-------------------------|-----|----------|----------------------|
|                                          | ISCW015477              | 330 | DS980614 | 7,699..11,969        |
|                                          | ISCW001875              | 325 | DS671188 | 563,450..582,923     |
|                                          | ISCW020818 <sup>a</sup> | 311 | DS839663 | 18,224..21,291       |
|                                          | ISCW020837 <sup>a</sup> | 287 | DS812474 | 41,993..42,853       |
|                                          | ISCW009994              | 281 | DS822211 | 2,541..12,634        |
|                                          | ISCW022255 <sup>a</sup> | 279 | DS921995 | 1,025,904..1,026,740 |
|                                          | ISCW020827 <sup>a</sup> | 279 | DS818569 | 123,253..124,089     |
|                                          | ISCW011398 <sup>a</sup> | 279 | DS859680 | 180,717..181,553     |
|                                          | ISCW001837 <sup>a</sup> | 272 | DS683640 | 413,937..414,752     |
|                                          | ISCW023613 <sup>a</sup> | 270 | DS963588 | 441,327..442,136     |
|                                          | ISCW020828 <sup>a</sup> | 259 | DS818569 | 128,594..129,370     |
|                                          | ISCW022256 <sup>a</sup> | 250 | DS921995 | 1,059,602..1,060,351 |
|                                          | ISCW021543 <sup>a</sup> | 250 | DS889213 | 54,792..55,544       |
|                                          | ISCW022245 <sup>a</sup> | 245 | DS921995 | 682,492..684,860     |
|                                          | ISCW000833              | 228 | DS629490 | 41,992..45,753       |
|                                          | ISCW015220              | 227 | DS974313 | 721..11,930          |
|                                          | ISCW009289              | 227 | DS841411 | 1,826..9,546         |
|                                          | ISCW020834 <sup>a</sup> | 217 | DS818569 | 273,050..276,739     |
|                                          | ISCW006376              | 207 | DS768980 | 5,026..13,061        |
|                                          | ISCW022249 <sup>a</sup> | 202 | DS921995 | 846,363..846,968     |
|                                          | ISCW024894              | 188 | DS932732 | 484..1,047           |
|                                          | ISCW020831 <sup>a</sup> | 186 | DS818569 | 228,504..229,808     |
|                                          | ISCW004947              | 141 | DS728330 | 428..4,745           |
|                                          | ISCW022250 <sup>a</sup> | 128 | DS921995 | 870,943..875,528     |
|                                          | ISCW014233              | 118 | DS937587 | 97..453              |
|                                          | ISCW007945 <sup>a</sup> | 113 | DS788282 | 16,722..17,682       |
| Carboxylesterase                         | ISCW019824              | 391 | DS796655 | 26,651..39,339       |
| Juvenile Hormone Esterase                | ISCW016978              | 412 | DS654645 | 97,242..121,428      |
|                                          | ISCW022078              | 276 | DS892946 | 257,260..279,544     |
| Pyrethroid-Metabolizing Carboxylesterase | ISCW014411              | 530 | DS971257 | 10,154..12,726       |
|                                          | ISCW014780              | 503 | DS967860 | 56,802..58,313       |
|                                          | ISCW022961 <sup>b</sup> | 491 | DS939604 | 711,415..712,890     |
|                                          | ISCW023610 <sup>a</sup> | 489 | DS963588 | 305,840..327,886     |
|                                          | ISCW023611 <sup>a</sup> | 431 | DS963588 | 334,284..355,108     |
|                                          | ISCW023612 <sup>a</sup> | 359 | DS963588 | 380,390..381,538     |
|                                          | ISCW007946 <sup>a</sup> | 255 | DS788282 | 22,248..23,305       |
|                                          | ISCW024448              | 246 | DS793560 | 222..962             |
|                                          | ISCW001836 <sup>a</sup> | 208 | DS683640 | 406,591..413,763     |
|                                          | ISCW022937              | 183 | DS971562 | 177,536..178,574     |
|                                          | ISCW023615 <sup>a</sup> | 155 | DS963588 | 451,386..452,909     |

<sup>†</sup>Gene models ranked in order of descending amino acid length of conceptual protein.

<sup>a</sup>Denotes scaffold containing two or more carboxylesterase gene models.

<sup>b</sup>Denotes potentially complete gene model.

<sup>c</sup>Denotes putative acetylcholinesterase; AChE, acetylcholinesterase.

**Supplementary Table 25. Putative neuropeptide genes in *Ixodes scapularis*.**

| Neuropeptide Genes                                                   | Scaffold | Scaffold Coordinates (bp) | VectorBase Accession    |
|----------------------------------------------------------------------|----------|---------------------------|-------------------------|
| Achatin-like (GFGE)                                                  | DS940350 | 23019..23117              | NA                      |
| AKH/corazonin-related peptide                                        | DS968442 | 24720..24893              | NA                      |
| Allatostatin A                                                       | DS971562 | 340315..339812            | ISCW022939              |
| Allatostatin B (myoinhibitory peptide)                               | DS704057 | 214860..217973            | ISCW017595              |
| Allatostatin C                                                       | DS617680 | 26756..26517              | ISCW001803              |
| Allatosattin CC                                                      | DS614450 | 94160..93978              | ISCW001408              |
| Allatotropin                                                         | DS723986 | 69897..74019              | ISCW017791              |
| Vasopressin/Oxytocin-like (inotocin) <sup>a</sup>                    | DS955335 | 731..757                  | NA                      |
|                                                                      | DS655913 | 50489..50686              | NA                      |
| Bursicon alpha                                                       | DS725348 | 327154..329168            | ISCW004617              |
| Bursicon beta                                                        | DS725348 | 334706..336760            | ISCW004618              |
| CAPA (Pyrokinin / periviscerokinin)                                  | DS798279 | 53447..57119              | ISCW019582 <sup>c</sup> |
| CCAP                                                                 | DS863512 | 155818..156096            | ISCW010619              |
| CCHamide-1 <sup>a</sup>                                              | DS920188 | 4270..1925                | ISCW013057              |
|                                                                      | DS721341 | 944..1070                 |                         |
| Corazonin                                                            | DS968442 | 4830..8114                | ISCW014429              |
| Calcitonin-like diuretic hormone 1                                   | DS849364 | 213812..229510            | ISCW020490              |
| Calcitonin-like diuretic hormone 2                                   | DS833812 | 290964..308120            | ISCW009341              |
| Corticotropin-releasing factor-related diuretic hormone <sup>b</sup> | DS951787 | 1112..1534                | ISCW007845              |
|                                                                      | DS793410 | 18053..18115              |                         |
| Eclosion hormone                                                     | DS652454 | 187087..184932            | ISCW001941              |
| EFLamide                                                             | DS945230 | 55463-66354               | ISCW014582              |
| Glycoprotein A2 <sup>b</sup>                                         | DS850534 | 41653..41751              | NCBI prediction         |
|                                                                      | DS669550 | 1333..1046                |                         |
|                                                                      | DS957846 | 12481..12573              |                         |
| Glycoprotein B5                                                      | DS860962 | 49721..66736              | ISCW010926              |
| Insulin like peptide (ILP4)                                          | DS687889 | 56659..72302              | ISCW002549              |
| Ion transport peptide                                                | DS934076 | 108540..97467             | ISCW023228              |
| Kinin                                                                | DS680282 | 583..1410                 | ISCW024200 <sup>1</sup> |
| Neuroparsin                                                          | DS781496 | 23994..25192              | NA                      |
| Orcokinin                                                            | DS860349 | 8710..8450                | ISCW010518 <sup>1</sup> |
| Proctolin                                                            | DS752645 | 23044..97988              | ISCW005701 <sup>1</sup> |
| PTTH-like                                                            | DS624571 | 79215..96811              | ISCW001809              |
| RYamide                                                              | DS762742 | 10487...40630             | ISCW005825              |
| SIFamide                                                             | DS939604 | 10166..18491              | ISCW022950              |
| Short neuropeptide F <sup>a</sup>                                    | DS682464 | 1..104                    | ISCW007409              |
|                                                                      | DS800964 | 20299..20852              |                         |
| Sulfakinin                                                           | DS674693 | 50707..50498              | NA                      |
| Tachykinin <sup>a</sup>                                              | DS805407 | 18901..16589              | ISCW008383              |
|                                                                      | DS714254 | 229..80                   |                         |
| Trissin                                                              | DS706258 | 980-1054                  |                         |

**Novel Putative Neuropeptide Genes<sup>c</sup>**

|                            |          |                |                         |
|----------------------------|----------|----------------|-------------------------|
| FLVamide                   | DS925401 | 117227..115863 | NA                      |
| GTVamide-1 <sup>a</sup>    | DS641015 | 1037..1        | NA                      |
|                            | DS726073 | 1037..1        | NA                      |
|                            | DS871441 | 73..5          |                         |
| GTVamide-2                 | DS873396 | 117488..117156 | NA                      |
| IRLamide                   | DS963481 | 1316..567      | NA                      |
| LHFamide                   | DS918990 | 378863..381517 | ISCW012656              |
| LHFa/AVFamide <sup>b</sup> | DS918990 | 305627..305271 | ISCW000205              |
|                            | DS647107 | 913..1149      |                         |
| LRFamide                   | DS810236 | 227458..231328 | ISCW019773 <sup>d</sup> |
| PWGamide                   | DS680282 | 715..1383      | ISCW024200              |

|                                  |          |         |    |
|----------------------------------|----------|---------|----|
| QFTa/QFAa/QLTamide               | DS810352 | 3..1431 | NA |
| QFAa/ HFAa/QLTamide <sup>a</sup> | DS799148 | 921..19 | NA |
|                                  | DS699187 | 1175..1 | NA |
| QFAa/QVKamide                    | DS658524 | 979..2  | NA |

---

<sup>a</sup>The gene likely spans multiple scaffolds (and multiple predictions)

<sup>b</sup>Possible allelic forms of two scaffolds.

<sup>c</sup>Predicted based on the repeated short peptides with C-terminal amidation canonical signals (GR or GK).  
These peptides do not have homology with other known, insect neuropeptides.

<sup>d</sup>Predictions that need to be corrected for the reading frame.

NA=Not found in computational annotation.

**Supplementary Table 26. List of G protein-coupled receptors (GPCRs) identified in *Ixodes scapularis*.**

| GPCR class                                     | GPCR subclass            | GPCR family                     | <i>I. scapularis</i> GPCR | <i>I. scapularis</i> scaffold      | Coordinates on scaffold (bp)                | VectorBase accession                     |
|------------------------------------------------|--------------------------|---------------------------------|---------------------------|------------------------------------|---------------------------------------------|------------------------------------------|
| <b>(1) Class A-Rhod(opsin) receptor family</b> |                          |                                 |                           |                                    |                                             |                                          |
|                                                | <b>Amine receptors</b>   |                                 |                           |                                    |                                             |                                          |
|                                                |                          | <b>Dopamine</b>                 |                           |                                    |                                             |                                          |
|                                                |                          |                                 | GPRdop1 <sup>†</sup>      | DS648196                           | 133,404-134,681                             | ISCW001496                               |
|                                                |                          |                                 | GPRdop2 <sup>†</sup>      | DS812273                           | 247,251-248,624                             | ISCW008775                               |
|                                                |                          |                                 | GPRdop3_1                 | DS715310                           | 294,120-294,563                             | ISCW005105                               |
|                                                |                          |                                 | GPRdop3_2                 | DS748057                           | 13,854-13,963                               | ISCW006077                               |
|                                                |                          |                                 | GPRdop3_3                 | DS978565                           | 1,946-10,664                                | ISCW015254                               |
|                                                |                          |                                 | GPRdop3_4                 | DS834842                           | 11,072-11,233                               | ISCW008917                               |
|                                                |                          | <b>Muscarinic acetylcholine</b> |                           |                                    |                                             |                                          |
|                                                |                          |                                 | mAChR1                    | DS660344                           | 46,915-48,657                               | ISCW001961                               |
|                                                |                          |                                 | mAChR2                    | DS968008                           | 135,220-137,700                             | ISCW014424                               |
|                                                |                          | <b>Octopamine/Tyramine</b>      |                           |                                    |                                             |                                          |
|                                                |                          |                                 | GPRoa1 <sup>†</sup>       | DS729026                           | 32,100-33,527                               | ISCW003835                               |
|                                                |                          |                                 | GPRoa2 <sup>†</sup>       | DS847958                           | 146,790-147,929                             | ISCW008552                               |
|                                                |                          |                                 | GPRtyr1 <sup>†</sup>      | DS964012                           | 103,184-104,461                             | ISCW013655                               |
|                                                |                          |                                 | GPRtyr2 <sup>†</sup>      | DS728699                           | 4690-5811                                   | ISCW005195                               |
|                                                |                          | <b>Serotonin</b>                |                           |                                    |                                             |                                          |
|                                                |                          |                                 | GPR5ht1                   | DS756593                           | 240,283-253,629                             | ISCW019072                               |
|                                                |                          |                                 | GPR5ht2                   | DS883764                           | 16,244-17,440                               | ISCW020906                               |
|                                                |                          |                                 | GPR5ht3                   | DS666028                           | 398,996-400,363                             | ISCW017050                               |
|                                                |                          |                                 | GPR5ht4                   | DS756593                           | 157,071-160,431                             | ISCW019070                               |
|                                                | <b>Peptide receptors</b> |                                 |                           |                                    |                                             |                                          |
|                                                |                          | <b>ACP</b>                      |                           |                                    |                                             |                                          |
|                                                |                          |                                 | ACP-R1 <sup>†</sup>       | DS874502                           | 36,974-42,229                               | ISCW011612+NEW                           |
|                                                |                          |                                 | ACP-R2 <sup>†</sup>       | DS635143;<br>DS675617;<br>DS797600 | 68,533-69,052;<br>21664-21,867;<br>569-1124 | ISCW001755+<br>ISCW003272+<br>ISCW008018 |
|                                                |                          |                                 | ACP-R3 <sup>†</sup>       | DS786800                           | 296,857-297,402;<br>441,895-445,805         | ISCW019339+<br>ISCW019342                |
|                                                |                          |                                 | ACP-R4 <sup>†</sup>       | DS679693;<br>DS621023              | 139,339-139,860;<br>55,588-58,021           | ISCW017422+<br>ISCW000658                |
|                                                |                          |                                 | ACP-R5                    | DS641985                           | 30,478-31,447                               | ISCW000195                               |
|                                                |                          |                                 | ACP-R6                    | DS908815                           | 64,376-64,909                               | ISCW013251                               |
|                                                |                          | <b>Allatotropin</b>             |                           |                                    |                                             |                                          |

|                                          |                      |                                                              |                                                                          |                               |
|------------------------------------------|----------------------|--------------------------------------------------------------|--------------------------------------------------------------------------|-------------------------------|
|                                          | AT-R                 | DS978161                                                     | 73,824-74,264                                                            | ISCW015323+<br>ISCW015322     |
| Allatostatin (A)                         | Ast-A-R1             | DS627425                                                     | 21,088-22,374                                                            | ISCW001334                    |
|                                          | Ast-A-R2             | DS616747                                                     | 171,212-172,466                                                          | ISCW016381                    |
|                                          | Ast-A-R3             | DS616747                                                     | 216,452-217,633                                                          | ISCW016382                    |
|                                          | Ast-A-R4             | DS946344                                                     | 139,992-141,146                                                          | ISCW014938                    |
| Allatostatin (B)                         | Ast-B-R1             | DS814451                                                     | 498,437-516,130                                                          | ISCW008779-A                  |
|                                          | Ast-B-R2             | DS814451                                                     | 498,437-516,130                                                          | ISCW008779-B                  |
| Allatostatin (C)                         | Ast-C-R              | DS789528                                                     | 6,027-12,848                                                             | ISCW007666                    |
| Bursicon                                 | Burs-R               | DS641526                                                     | 219,850-250,933                                                          | ISCW015788                    |
| Capa/CAP <sub>2b</sub> /Periviscerokinin | Capa-R1 <sup>†</sup> | DS640702;<br>DS713265;<br>DS713265;<br>DS674949;<br>DS980147 | 9,628-9,977;<br>1,470-1,694;<br>18-304;<br>1,541-1,674;<br>14,584-15,105 | ISCW000633+NEW+<br>ISCW015219 |
|                                          | Capa-R2              | DS902408                                                     | 45-15,095                                                                | ISCW012018                    |
|                                          | Capa-R3              | DS967049                                                     | 68,951-69,238                                                            | ISCW014181                    |
| CCAP                                     | CCAP-R1              | DS642648                                                     | 32,147-35,927                                                            | ISCW000563                    |
|                                          | CCAP-R2              | DS902282                                                     | 1,720-11,529                                                             | ISCW013454                    |
|                                          | CCAP-R3              | DS713552                                                     | 1,900-18,499                                                             | ISCW004135                    |
|                                          | CCAP-R4              | DS881571                                                     | 21,179-21,656                                                            | ISCW011686                    |
| CCHamide-1                               | CCHa1-R              | DS955040                                                     | 343,318-344,424                                                          | ISCW015075                    |
| Corazonin                                | CRZ-R1 <sup>†</sup>  | DS862522;<br>DS753205                                        | 337,666-338,286;<br>99,573-100,052                                       | ISCW010571+<br>ISCW006212     |
|                                          | CRZ-R2               | DS743283                                                     | 73,952-74,512                                                            | ISCW005601                    |
| GPA2/GPB5                                | LGR1-A               | DS776412                                                     | 12,445-14,686                                                            | ISCW007539                    |
|                                          | LGR1-B               | DS670197                                                     | 19,910-20,201                                                            | ISCW001983                    |
| Inotocin                                 | IT-R1 <sup>†</sup>   | DS658583                                                     | 333,292-352,021                                                          | ISCW016651                    |
|                                          | IT-R2 <sup>†</sup>   | DS811967                                                     | 34,737-35,711                                                            | ISCW008700                    |

|               |                      |          |                                                                        |                              |
|---------------|----------------------|----------|------------------------------------------------------------------------|------------------------------|
| Kinin         | IT-R3 <sup>†</sup>   | DS802003 | 16,558-17,508                                                          | ISCW007179                   |
|               | Kin-R1 <sup>†</sup>  | DS915052 | 240,714-241,681;<br>53,234-53,339;<br>49,154-49,247;<br>45,556-45,826; | ISCW022730+<br>ISCW022728    |
|               | Kin-R2               | DS915052 | 769,801-769,880;<br>803,104-803,316                                    | ISCW022739                   |
|               | Kin-R3               | DS915406 | 62,791-63,588                                                          | ISCW022222                   |
| Myosuppressin | Kin-R4               | DS972284 | 15,019-15,848                                                          | ISCW015326                   |
|               | MS-R                 | DS710828 | 131-1,127                                                              | ISCW004636                   |
| Proctolin     | Proct-R              | DS711613 | 287,447-289,213;<br>289,343-291,511                                    | ISCW017865+<br>ISCW017866    |
|               | Pyrokinin            | PK-R*    | 1,062,985-1,063,966                                                    | ISCW022759+<br>ABJB011125851 |
| RYamide       | RYa-R1               | DS816975 | 121,888-122,667;<br>34,779-35,090                                      | ISCW020603+<br>ISCW020601    |
|               | RYa-R2               | DS816975 | 9,435-9,878                                                            | ISCW020600                   |
| SIFamide      | SIFa-R               | DS721695 | 449,641-450,381;<br>563,784-566,715                                    | ISCW017837+<br>ISCW017839    |
|               | Short Neuropeptide F |          |                                                                        |                              |
| Sulfakinin    | sNPF-R1              | DS646881 | 88,703-90,025                                                          | ISCW000923                   |
|               | sNPF-R2              | DS646881 | 90,611-91,642                                                          | ISCW000924                   |
| Tachykinin    | SK-R1                | DS748459 | 41,702-49,507                                                          | ISCW005570                   |
|               | SK-R2                | DS822900 | 6,468-9,788                                                            | ISCW009627                   |
|               | SK-R3                | DS909250 | 840,577-842,643                                                        | ISCW022781                   |
|               | SK-R4                | DS747369 | 8,639-37,302                                                           | ISCW005948                   |
|               | SK-R5                | DS671072 | 3,595-6,522                                                            | ISCW001892                   |
|               | SK-R6                | DS784565 | 1,046-55,113                                                           | ISCW007293                   |
|               | SK-R7                | DS648932 | 8,474-11,106                                                           | ISCW001201                   |
|               | TK-R1                | DS848485 | 50,750-51,163;<br>102,898-133,431                                      | ISCW010010+<br>ISCW010011    |
|               | TK-R2                | DS969660 | 233,259-233,744;                                                       | ISCW013545+                  |

|                                      |            |          |                 |            |
|--------------------------------------|------------|----------|-----------------|------------|
|                                      |            |          | 96,620-97,175   | ISCW013543 |
|                                      | TK-R3      | DS787613 | 187,848-188,293 | ISCW007598 |
|                                      | TK-R4      | DS966520 | 9,416-9,925     | ISCW013598 |
|                                      | TK-R5      | DS643864 | 392,493-428,777 | ISCW015892 |
|                                      | TK-R6      | DS765493 | 118,152-120,504 | ISCW006511 |
|                                      | TK-R7      | DS754151 | 181,199-209,245 | ISCW005553 |
|                                      | TK-R8      | DS641764 | 8,595-8,791     | ISCW000039 |
|                                      | TK-R9      | DS747089 | 177,811-178,007 | ISCW006476 |
|                                      | TK-R10     | DS649700 | 31,210-31,421   | ISCW001766 |
| Trissin                              |            |          |                 |            |
|                                      | Trissin-R1 | DS746403 | 46,424-55,835   | ISCW006418 |
|                                      | Trissin-R2 | DS812310 | 49,622-55,240   | ISCW009718 |
| <b>Purine receptors</b>              |            |          |                 |            |
| <b>Adenosine</b>                     |            |          |                 |            |
|                                      | GPRads1    | DS751891 | 15-731          | ISCW006710 |
|                                      | GPRads2    | DS857834 | 851,959-852,927 | ISCW021342 |
|                                      | GPRads3    | DS688131 | 171,862-193,233 | ISCW002246 |
| <b>(Rhod)opsin receptors</b>         |            |          |                 |            |
| <b>Long</b>                          |            |          |                 |            |
|                                      | GPRop1_1   | DS655566 | 780-1051        | NEW        |
|                                      | GPRop1_2   | DS631721 | 363-641         | NEW        |
|                                      | GPRop1_3   | DS955589 | 190-451         | NEW        |
|                                      | GPRop1_4   | DS681879 | 565-876         | NEW        |
| <b>Unknown</b>                       |            |          |                 |            |
|                                      | GPRop2_1   | DS727386 | 14108-17853     | ISCW004568 |
|                                      | GPRop2_2   | DS647038 | 58-387          | NEW        |
| <b>Pteropsin</b>                     |            |          |                 |            |
|                                      | GPRop3     | DS748823 | 19,086-19,376   | ISCW005498 |
| <b>Orphan/Putative Class A GPCRs</b> |            |          |                 |            |
|                                      | GPRorp1    | DS834336 | 4,245-8,992     | ISCW009595 |
|                                      | GPRorp2    | DS928128 | 52-732          | ISCW011905 |
|                                      | GPRorp3    | DS885437 | 65,156-92,934   | ISCW021283 |
|                                      | GPRorp4    | DS854897 | 42,286-78,035   | ISCW020998 |
|                                      | GPRorp5    | DS895157 | 172,724-173,425 | ISCW022377 |
|                                      | GPRorp6    | DS810236 | 58,185-65,642   | ISCW019770 |
|                                      | GPRorp7    | DS961247 | 253,289-254,266 | ISCW014455 |
|                                      | GPRorp8    | DS694733 | 137,237-138,349 | ISCW003493 |
|                                      | GPRorp9    | DS758491 | 336,265-339,216 | ISCW018984 |
|                                      | GPRorp10   | DS799887 | 152,872-154,406 | ISCW007873 |
|                                      | GPRorp11   | DS622494 | 210,268-238,098 | ISCW000432 |
|                                      | GPRorp12   | DS794020 | 20,137-20,862   | ISCW007619 |
|                                      | GPRorp13   | DS957018 | 374,567-374,881 | ISCW023266 |
|                                      | GPRorp14   | DS819573 | 1,022-9,833     | ISCW008691 |

|                       |          |                     |                |
|-----------------------|----------|---------------------|----------------|
| GPRorp15              | DS895157 | 130,408-130,773     | ISCW022376     |
| GPRorp16              | DS727732 | 6,810-7,274         | ISCW018171     |
| GPRorp17              | DS718929 | 48,953-50,059       | ISCW004650     |
| GPRorp18              | DS695281 | 139,310-140,419     | ISCW018273     |
| GPRorp19              | DS651746 | 89,066-90,402       | ISCW015953     |
| GPRorp20              | DS849590 | 246,992-248,101     | ISCW010126     |
| GPRorp21 <sup>†</sup> | DS978744 | 75,826-92,419       | ISCW015218+NEW |
| GPRorp22              | DS664726 | 6,762-7,730         | ISCW002641     |
| GPRorp23              | DS909250 | 807,932-809,260     | ISCW022779     |
| GPRorp24              | DS951856 | 59,174-59,443       | ISCW013584     |
| GPRorp25              | DS933420 | 12,704-13,765       | ISCW014824     |
| GPRorp26              | DS626219 | 6,965-8,056         | ISCW000606     |
| GPRorp27              | DS822291 | 20,914-22,134       | ISCW010179     |
| GPRorp28              | DS847080 | 82-553              | NEW            |
| GPRorp29              | DS794029 | 116-365             | NEW            |
| GPRorp30              | DS957063 | 1,197-1,356         | NEW            |
| GPRorp31              | DS622115 | 720-804             | NEW            |
| GPRorp31              | DS734036 | 1,535,022-1,543,165 | ISCW018990     |
| GPRorp32              | DS848412 | 15,099-15,401       | ISCW009648     |
| GPRorp33              | DS673067 | 5,821-6,303         | ISCW002847     |
| GPRorp34              | DS923672 | 7,604-8,503         | ISCW013090     |
| GPRorp35              | DS825031 | 28,068-29,836       | ISCW009568     |
| GPRorp36              | DS915257 | 2,800-28,037        | ISCW013383     |
| GPRorp37              | DS708537 | 221,842-297,739     | ISCW018360     |
| GPRorp38              | DS930058 | 108,838-109,239     | ISCW013211     |
| GPRorp39              | DS755450 | 72,170-87,450       | ISCW006089     |
| GPRorp40              | DS848412 | 15099-15401         | ISCW009648     |
| GPRorp41              | DS673067 | 5,821-6,303         | ISCW002847     |
| GPRorp42              | DS923672 | 7,604-8,503         | ISCW013090     |
| GPRorp43              | DS825031 | 28,068-29,836       | ISCW009568     |

**(2) Class B – Secretin receptor family**  
**Diuretic hormone receptors**

Calcitonin-like

|                       |          |                 |            |
|-----------------------|----------|-----------------|------------|
| CT/DH-R1 <sup>*</sup> | DS922272 | 17,085-30,991   | ISCW012970 |
| CT/DH-R2              | DS687147 | 107,053-141,306 | ISCW003092 |
| CT/DH-R3              | DS769661 | 26,884-146,275  | ISCW018841 |
| CT/DH-R4              | DS711942 | 10,647-69,312   | ISCW004902 |
| CT/DH-R5              | DS677381 | 25,745-78,149   | ISCW017538 |

|                                                 |           |                     |             |  |
|-------------------------------------------------|-----------|---------------------|-------------|--|
| Corticotropin-releasing hormone-like (CRF-like) |           |                     |             |  |
| CRF/DH-R1*                                      | DS783174  | 89,137-131,136      | ISCW007036  |  |
| CRF/DH-R2a <sup>†‡</sup>                        | DS784114; | 14,660-139,631;     | ISCW007612; |  |
|                                                 | DS789666  | 100,614-100,769     | ISCW007615  |  |
| CRF/DH-R2b                                      | DS704079  | 5,933-78,153        | ISCW017942  |  |
| CRF/DH-R3                                       | DS758074  | 212,330-212,392     | NEW         |  |
|                                                 |           | 214,835-214,983     | NEW         |  |
|                                                 |           | 221,884-221,950     | ISCW019068  |  |
| CRF/DH-R4                                       | DS793456  | 1,543-38,369        | ISCW019312  |  |
| CRF/DH-R5                                       | DS810171  | 300-480             | NEW         |  |
| <b>Pigment dispersing factor receptor</b>       |           |                     |             |  |
| PDF-R1                                          | DS668046  | 445,965-498,626     | ISCW017309  |  |
| PDF-R2                                          | DS668046  | 721,274-777,173     | ISCW017314  |  |
| <b>Orphan/ Putative Class B GPCRs</b>           |           |                     |             |  |
| GPRorp1                                         | DS906776  | 30,788-78,611       | ISCW012057  |  |
| GPRorp2                                         | DS909780  | 606,602-613,020     | ISCW022534  |  |
| GPRorp3                                         | DS650442  | 28,460-36,150       | ISCW016343  |  |
| GPRorp4                                         | DS650414  | 56,145-57,149       | ISCW000074  |  |
| GPRorp5                                         | DS757053  | 175,008-192,421     | ISCW005937  |  |
| GPRorp7                                         | DS929178  | 814,031-814,471     | ISCW022757  |  |
| GPRorp8                                         | DS921316  | 47,452-59,327       | ISCW012038  |  |
| GPRorp9                                         | DS714433  | 547,697-550,000     | ISCW018246  |  |
| GPRorp10                                        | DS968865  | 1,339,830-1,340,321 | ISCW023674  |  |
| GPRorp11                                        | DS968865  | 1,320,857-1,321,348 | ISCW023671  |  |
| GPRorp12                                        | DS968865  | 1,338,700-1,339,191 | ISCW023673  |  |
| GPRorp13                                        | DS646990  | 289,490-339,295     | ISCW000464  |  |
| GPRorp14                                        | DS806217  | 91,135-151,617      | ISCW019673  |  |
| GPRorp15                                        | DS627544  | 239,378-248,563     | ISCW001355  |  |
| GPRorp16                                        | DS929508  | 189,207-239,610     | ISCW012721  |  |
| GPRorp17                                        | DS756825  | 20,407-111,042      | ISCW006717  |  |
| GPRorp18                                        | DS905169  | 68,799-70,697       | ISCW022854  |  |
| GPRorp19                                        | DS885034  | 25,512-27,359       | ISCW010897  |  |
| GPRorp20                                        | DS730006  | 701-1,822           | ISCW004659  |  |
| GPRorp21                                        | DS674693  | 369,558-371,486     | ISCW016899  |  |
| GPRorp22                                        | DS968865  | 1,272,426-1,274,804 | ISCW023670  |  |
| GPRorp23                                        | DS958380  | 104-9,636           | ISCW014021  |  |
| GPRorp24                                        | DS979492  | 46,128-46,284       | ISCW015339  |  |
| GPRorp25                                        | DS788275  | 144-266             | NEW         |  |

### (3) Class C – Metabotropic glutamate-like receptor family

**Metabotropic glutamate receptors**

|           |          |                 |            |
|-----------|----------|-----------------|------------|
| GPRmgl1   | DS827319 | 1,297-9,829     | ISCW010068 |
| GPRmgl2   | DS837710 | 392,177-408,030 | ISCW020530 |
| GPRmgl3   | DS727862 | 10,596-30,463   | ISCW004657 |
| GPRmgl4   | DS687238 | 5,152-11,333    | ISCW016808 |
| GPRmgl5   | DS908406 | 8,172-49,656    | ISCW013154 |
| GPRmgl6_1 | DS614359 | 383,268-425,389 | ISCW016580 |
| GPRmgl6_2 | DS614359 | 190,697-267,345 | ISCW016579 |
| GPRmgl7   | DS814554 | 1,703-14,641    | ISCW009984 |
| GPRmgl8   | DS686939 | 2,170-2,646     | ISCW002379 |

**GABA(B) receptors**

|           |          |                 |            |
|-----------|----------|-----------------|------------|
| GPRgbb1   | DS792523 | 21,774-51,362   | ISCW019833 |
| GPRgbb2_1 | DS856995 | 432,245-455,920 | ISCW021466 |
| GPRgbb2_2 | DS856995 | 551,946-568,013 | ISCW021468 |
| GPRgbb3   | DS963588 | 123,993-201,680 | ISCW023607 |
| GPRgbb4_1 | DS842011 | 316,154-318,677 | ISCW020868 |
| GPRgbb4_2 | DS842011 | 205,862-222,694 | ISCW020865 |
| GPRgbb4_3 | DS842011 | 165,731-169,913 | ISCW020864 |
| GPRgbb4_4 | DS842011 | 92,375-140,091  | ISCW020863 |
| GPRgbb4_5 | DS842011 | 33,574-49,385   | ISCW020862 |

**Orphan/Putative Class C GPCRs**

|         |          |                 |            |
|---------|----------|-----------------|------------|
| GPRorp1 | DS959025 | 442,721-466,585 | ISCW023311 |
| GPRorp2 | DS877997 | 216-1,225       | ISCW011406 |
| GPRorp3 | DS696092 | 86,002-87,104   | ISCW017670 |
| GPRorp4 | DS963588 | 471,884-472,447 | ISCW023616 |

**(4) Class D- Atypical 7TM proteins****Frizzled**

|        |          |                 |            |
|--------|----------|-----------------|------------|
| GPRfz1 | DS671553 | 112,320-113,984 | ISCW003177 |
| GPRfz2 | DS624476 | 452,659-454,854 | ISCW016122 |
| GPRfz3 | DS976137 | 33,694-34,746   | ISCW015217 |
| GPRfz4 | DS702749 | 85,729-87,155   | ISCW003981 |
| GPRfz5 | DS703155 | 48,275-50,017   | ISCW004077 |
| GPRfz6 | DS708614 | 201,139-213,311 | ISCW004862 |
| GPRfz7 | DS877147 | 771-1175        | NEW        |

**Smoothened**

|        |          |                 |            |
|--------|----------|-----------------|------------|
| GPRsmo | DS857340 | 534,668-554,150 | ISCW021763 |
|--------|----------|-----------------|------------|

**Starry night**

|        |          |               |            |
|--------|----------|---------------|------------|
| GPRstn | DS931589 | 4,009-100,015 | ISCW022151 |
|--------|----------|---------------|------------|

The *I. scapularis* G protein-coupled receptors (GPCRs) are categorized according to their predicted class, subclass, and family. The scaffold number, annotation coordinates and the GenBank accession number (ISCW identifier) corresponding to each GPCR are provided. Abbreviations for GPCR nomenclature: ACP, AKH/corazonin-related peptide; adr, adrenergic; ads, adenosine; Ast, allatostatin; AT, Allatropin; Burs, bursicon; CT, calcitonin; Capa, Capa peptide; CCHa1, CCHamide-1; CCAP, cardioacceleratory peptide; cir, cirl/latrophilin; CRF, Corticotropin-releasing factor-like; CRZ, corazonin; dop, dopamine; fz, frizzled; gbb, gamma amino butyric acid B receptor (GABA<sub>B</sub>); GPA2, Glycoprotein hormone-alpha-2; GPB5, glycoprotein hormone-beta-5; 5HT, 5-hydroxytryptamine/serotonin; IT, insect oxytocin/vasopressin-like peptide; LGR, leucine-rich repeat-containing GPCR; mACh, muscarinic acetylcholine; mgl, metabotropic glutamate; mth, methuselah; MS, myosuppressin; sNPF, short neuropeptide F; npr, neuropeptide receptor; oa, octopamine; op, opsin; orp, orphan; pct, proctolin; pdf, pigment-dispersing factor; pth, parathyroid hormone; pyn, pyrokinin; rxn, relaxin/insulin-like; RYa, RYamide; SK, sulfakinin; SIFa, SIFamide; smo, smoothened; stn, stan/starry night; TK, tachykinin; tyr, tyramine. The gene models corresponding to Dop3\_1-4 (D<sub>2</sub>-like dopamine receptor), GPRmgl6\_1-2, GPRgbb2\_1-2, and GPRgbb4\_1-5 are believed to represent fragments of single genes split among different contigs. Similarly, Op1\_1-4 are fragments of a single gene and confirmed by RT-PCR, and Op2\_1 and Op2\_2 represent overlapping portions of the same gene but assigned to different contigs, possibly due to an assembly error.

Footnotes:

† Entire cDNA cloned.

‡ N-terminus of CRF/DH-R2a includes gene model ISCW007615.

\* Partial cDNA clone

NEW: not automatically annotated, but newly identified region.

**Supplementary Table 27. Summary of neuropeptides and neuropeptide GPCRs in *Ixodes scapularis*.**

| Neuropeptide | Neuropeptide Gene ID | Neuropeptide GPCR   | Neuropeptide GPCR Gene ID and Transmembrane (TM) Domains |     |            |     |            |            |            |
|--------------|----------------------|---------------------|----------------------------------------------------------|-----|------------|-----|------------|------------|------------|
|              |                      |                     | TM1                                                      | TM2 | TM3        | TM4 | TM5        | TM6        | TM7        |
| ACP          | DS968442             | ACP-R1 <sup>†</sup> | ISCW011612                                               |     |            |     |            | NEW        |            |
|              |                      | ACP-R2 <sup>†</sup> | ISCW001755                                               |     |            |     | ISCW003272 | ISCW008018 |            |
|              |                      | ACP-R3 <sup>†</sup> | ISCW019339                                               |     |            |     | ISCW019342 |            |            |
|              |                      | ACP-R4 <sup>†</sup> | ISCW017422                                               |     |            |     | ISCW000658 |            |            |
|              |                      | ACP-R5              |                                                          |     |            |     | ISCW000195 |            |            |
|              |                      | ACP-R6              |                                                          |     |            |     |            |            | ISCW013251 |
| Allatotropin | ISCW017791           | AT-R                | ISCW015323                                               |     | ISCW015322 |     |            |            |            |
| Ast-A        | ISCW022939           | Ast-A-R1            | ISCW001334                                               |     |            |     |            |            |            |
|              |                      | Ast-A-R2            | ISCW016381                                               |     |            |     |            |            |            |
|              |                      | Ast-A-R3            | ISCW016382                                               |     |            |     |            |            |            |
|              |                      | Ast-A-R4            | ISCW014938                                               |     |            |     |            |            |            |

|                         |            |                      |              |     |            |
|-------------------------|------------|----------------------|--------------|-----|------------|
| Ast-B                   | ISCW017595 | Ast-B-R1*            | ISCW008779-A |     |            |
|                         |            | Ast-B-R2*            | ISCW008779-B |     |            |
|                         |            |                      |              |     |            |
| Ast-C <sup>§</sup>      | ISCW001803 | Ast-C-R              | ISCW007666   |     |            |
| Ast-CC <sup>§</sup>     | ISCW001408 |                      |              |     |            |
|                         |            |                      |              |     |            |
| Bursicon a <sup>§</sup> | ISCW004617 | Burs-R               | ISCW015788   |     |            |
| Bursicon b <sup>§</sup> | ISCW004618 |                      |              |     |            |
|                         |            |                      |              |     |            |
| Capa                    |            | Capa-R1 <sup>†</sup> | ISCW000633   | NEW | ISCW015219 |
|                         |            | Capa-R2              | ISCW012018   |     |            |
|                         |            | Capa-R3              | ISCW014181   |     |            |
|                         |            |                      |              |     |            |
| CCAP                    | ISCW010619 | CCAP-R1              | ISCW000563   |     |            |
|                         |            |                      |              |     |            |
| CCHamide-1              | ISCW013057 | CCHa1-R              | ISCW015075   |     |            |
|                         |            |                      |              |     |            |
| Corazonin               | ISCW014429 | CRZ-R1 <sup>†</sup>  | ISCW010571   |     | ISCW006212 |
|                         |            | CRZ-R2               | ISCW005601   |     |            |

|          |            |              |            |
|----------|------------|--------------|------------|
| CRF/DH   | ISCW007845 | CRF/DH-R1    | ISCW007036 |
|          |            | CRF/DH-R2a†‡ | ISCW007612 |
|          |            | CRF/DH-R2b   | ISCW017942 |
|          |            | CRF/DH-R3    | NEW        |
|          |            | CRF/DH-R4    | ISCW019312 |
|          |            | CRF/DH-R5    | NEW        |
| CT/DH    | ISCW020490 | CT/DH-R1     | ISCW012970 |
|          |            | CT/DH-R2     | ISCW003092 |
|          | ISCW009341 | CT/DH-R3     | ISCW018841 |
|          |            | CT/DH-R4     | ISCW004902 |
|          |            | CT/DH-R5     | ISCW017538 |
| GPA2§    | DS669550   | LGR1-A       | ISCW007539 |
| GPB5§    | ISCW010926 | LGR1-B       | ISCW001983 |
| Inotocin | DS955355   | IT-R1†       | ISCW016651 |

|               |            |                     |            |            |
|---------------|------------|---------------------|------------|------------|
|               |            | IT-R2 <sup>†</sup>  | ISCW008700 |            |
|               |            | IT-R3 <sup>†</sup>  | ISCW007179 |            |
| Kinin         | ISCW024200 | Kin-R1 <sup>†</sup> | ISCW022730 | ISCW022728 |
|               |            | Kin-R2              | ISCW022739 |            |
|               |            | Kin-R3              | ISCW022222 |            |
|               |            | Kin-R4              | ISCW015326 |            |
| Myosuppressin |            | MS-R                | ISCW004636 |            |
| PDF           |            | PDF-R1              | ISCW017309 |            |
|               |            | PDF-R2              | ISCW017314 |            |
| Proctolin     | ISCW005701 | Proct-R             | ISCW017865 | ISCW017866 |
| Pyrokinin     | ISCW019582 | PK-R                | ISCW022759 | NEW        |
| RYamide       | ISCW005825 | RYa-R1              | ISCW020603 | ISCW020601 |
|               |            | RYa-R2              | ISCW020600 |            |

|            |            |         |            |            |
|------------|------------|---------|------------|------------|
| SIFamide   | ISCW022950 | SIFa-R  | ISCW017837 | ISCW017839 |
| sNPF       | ISCW007409 | sNPF-R1 | ISCW000923 |            |
|            |            | sNPF-R2 | ISCW000924 |            |
| Sulfakinin | DS674693   | SK-R1   | ISCW005570 |            |
|            |            | SK-R2   | ISCW009627 |            |
|            |            | SK-R3   | ISCW022781 |            |
|            |            | SK-R4   | ISCW005948 |            |
|            |            | SK-R5   | ISCW001892 |            |
|            |            | SK-R6   | ISCW007293 |            |
|            |            | SK-R7   | ISCW001201 |            |
| Tachykinin | ISCW008383 | TK-R1   | ISCW010010 | ISCW010011 |
|            |            | TK-R2   | ISCW013545 | ISCW013543 |
|            |            | TK-R3   | ISCW007598 |            |
|            |            | TK-R4   | ISCW013598 |            |

|         |          |            |            |
|---------|----------|------------|------------|
|         |          | TK-R5      | ISCW015892 |
|         |          | TK-R6      | ISCW006511 |
|         |          | TK-R7      | ISCW005553 |
|         |          | TK-R8      | ISCW000039 |
|         |          | TK-R9      | ISCW006476 |
|         |          | TK-R10     | ISCW001766 |
| <hr/>   |          |            |            |
| Trissin | DS706258 | Trissin-R1 | ISCW006418 |
|         |          | Trissin-R2 | ISCW009718 |

---

<sup>†</sup> Entire cDNA cloned.

<sup>‡</sup> N-terminus of CRF/DH-R2a includes gene model ISCW007615.

\* Original annotation contained two fused genes which have now been corrected (A+B).

<sup>§</sup> These ligands use the same receptor.

NEW: not automatically annotated, but newly identified region.

**Supplementary Table 28. Selection of neuropeptide and G protein-coupled receptor (GPCR) genes that have been expanded in *Ixodes scapularis* compared to other sequences in arthropods.**

| Neuropeptide | A. No. Neuropeptide Genes |                  | B. No. Peptide Copies in the Propeptide |                  | GPCRs      | C. No. GPCR Genes    |                  |
|--------------|---------------------------|------------------|-----------------------------------------|------------------|------------|----------------------|------------------|
|              | <i>I. scapularis</i>      | Other Arthropods | <i>I. scapularis</i>                    | Other Arthropods |            | <i>I. scapularis</i> | Other Arthropods |
| ACP          | 1                         | 1                | 1                                       | 1                | ACP-Rs     | 6                    | 1                |
| Ast-A        | 1                         | 1                | 4                                       | 1-35             | Ast-A-Rs   | 4                    | 1-2              |
| Ast-B        | 1                         | 1                | 3                                       | 1-6              | Ast-B-Rs   | 2                    | 1                |
| Capa         | -                         | 1                | -                                       | 2-3              | Capa-Rs    | 3                    | 1                |
| Corazonin    | 1                         | 1                | 1                                       | 1                | CRZ-Rs     | 2                    | 1                |
| CRF/DH       | 1                         | 1                | 1                                       | 1                | CRF/DH-Rs  | 5                    | 1-2              |
| CT/DH        | 2                         | 1                | 1                                       | 1                | CT/DH-Rs   | 5                    | 1-2              |
| Inotocin     | 1                         | 1                | 1                                       | 1                | IT-Rs      | 3                    | 1                |
| Kinin        | 1                         | 1                | 19                                      | 1-8              | Kin-Rs     | 4                    | 1                |
| PDF          | 1                         | 1                | 1                                       | 1                | PDF-Rs     | 3                    | 1                |
| sNPF         | 1                         | 1                | 1                                       | 1-5              | sNPF-Rs    | 2                    | 1                |
| Sulfakinin   | 1                         | 1                | 2                                       | 2                | SK-Rs      | 7                    | 1-2              |
| Tachykinin   | 1                         | 1                | 4                                       | 4-11             | TK-Rs      | 10                   | 1-2              |
| Trissin      | 1                         | 1                | 1                                       | 1                | Trissin-Rs | 2                    | 1                |

Genes expanded in *I. scapularis* relative to other sequenced arthropods are shaded in gray. The number of neuropeptide genes is not expanded in *I. scapularis* in comparison to other arthropods (Section A). The number of neuropeptides in the *I. scapularis* kinin propeptide is expanded compared to other arthropods (Section B). Twelve neuropeptide GPCRs are expanded in number in *I. scapularis* in comparison to other arthropods (Section C).

**Supplementary Table 29. Details of the *Ixodes scapularis* gustatory receptor (IsGr) family genes and proteins.** Columns are: Gene – the gene and protein name assigned (suffixes are PSE – pseudogene, NTE – N-terminus missing, CTE – C-terminus missing, INT – internal exon missing, FIX – assembly was repaired, JOI – gene model spans scaffolds; multiple suffixes are abbreviated to single letters); OGS – the official gene number in the 20,486 proteins in OGSv1 (prefix is ISCW); Supercontig – the v1 genome assembly supercontig ID (prefix DS); Coordinates – the nucleotide range from the first position of the start codon to the last position of the stop codon in the scaffold; Strand – + is forward and - is reverse; Introns – number of introns in coding region; AAs – number of encoded amino acids in the protein; Comments – comments on the OGS gene model, repairs to the genome assembly, and pseudogene status (numbers in parentheses are the number of obvious pseudogenizing mutations).

| Gene    | OGS    | Scaffold | Coordinates    | Strand | Introns | AAs | Comments                  |
|---------|--------|----------|----------------|--------|---------|-----|---------------------------|
| Gr1FIX  | 018232 | 700356   | 130622-133945  | +      | 3       | 403 | Fix assembly gap          |
| Gr2FIX  | 011821 | 855368   | 2651->5255     | +      | 3       | 399 | Fix assembly gap          |
| Gr3FIX  | -      | 855368   | <16600-25223   | +      | 3       | 389 | Fix assembly gap          |
| Gr4CTE  | -      | 855368   | 29556->30788   | +      | 3       | 363 | Last exon missing         |
| Gr5INT  | -      | 855368   | 50700-60493    | -      | 3       | 365 | Third exon missing        |
| Gr6CTE  | 011822 | 855368   | 78232->80092   | +      | 3       | 367 | Last exon missing         |
| Gr7INT  | -      | 855368   | 88901-90482    | +      | 3       | 369 | Third exon missing        |
| Gr8PSE  | -      | 855368   | 102468-103531  | +      | 3       | 327 | Pseudogene (10)           |
| Gr9     | 800162 | 855368   | 122988-129732  | +      | 3       | 404 | New gene model            |
| Gr10    | 800163 | 855368   | 160441-163747  | +      | 3       | 394 | New gene model            |
| Gr11FIX | 011826 | 855368   | 172171-176518  | +      | 3       | 409 | Fix assembly              |
| Gr12FIX | -      | 681555   | <144303-147585 | -      | 3       | 408 | Fix assembly gap          |
| Gr13FIX | -      | 681555   | 122727-130437  | -      | 3       | 394 | Fix assembly              |
| Gr14    | 800164 | 681555   | 110946-114435  | -      | 3       | 406 | New gene model            |
| Gr15    | 800165 | 681555   | 97115-99209    | -      | 3       | 409 | New gene model            |
| Gr16FIX | -      | 681555   | 85287-92568    | -      | 3       | 413 | Fix assembly gap          |
| Gr17CTE | -      | 681555   | <68420-69367   | -      | 1       | 316 | Last three exons missing  |
| Gr18    | 800161 | 740051   | 6893-11542     | +      | 3       | 394 | New gene model            |
| Gr19FJ  | -      | 686724   | 82->1133       | +      | 3       | 401 | Join across two scaffolds |
| Gr20JI  | -      | 797949   | 190->4652      | -      |         |     | Fix gap between scaffolds |
|         | -      | 615125   | <1-677         | -      | 3       | 305 | Join across two scaffolds |
| Gr21FIX | -      | 686967   | <1-12718       | +      |         |     | Part of exon one missing  |
|         | -      | 848686   | <7763-10335    | +      | 3       | 401 | Fix assembly gap          |
| Gr22PSE | -      | 832595   | 17507-19366    | +      | 3       | 393 | Pseudogene (1)            |
| Gr23PSE | -      | 832595   | 32755-34887    | +      | 3       | 393 | Pseudogene (5)            |
| Gr24    | 800167 | 938791   | 41333-43178    | +      | 3       | 393 | New gene model            |
| Gr25    | 800168 | 938791   | 80049-81932    | +      | 3       | 393 | New gene model            |
| Gr26    | 800166 | 853698   | 97706-99752    | -      | 3       | 393 | New gene model            |
| Gr27    | 800169 | 853698   | 89684-92137    | -      | 3       | 393 | New gene model            |
| Gr28    | 800170 | 853698   | 111225-112868  | -      | 3       | 393 | New gene model            |
| Gr29FIX | -      | 743784   | <1-539         | -      | 3       | 393 | Fix assembly gap          |
| Gr30FIX | -      | 857335   | 219->1239      | -      | 3       | 393 | Fix assembly gap          |
| Gr31FIX | -      | 960372   | <1-1000        | +      | 3       | 393 | Fix assembly gap          |
| Gr32FIX | -      | 682467   | 236->1431      | +      | 3       | 388 | Fix assembly gap          |
| Gr33    | -      | 873761   | 45170-47981    | +      | 2       | 387 | Lost first intron         |
| Gr34    | 800171 | 873761   | 51055-55819    | -      | 3       | 380 | New gene model            |
| Gr35    | 800184 | 849364   | 15863-44702    | +      | 3       | 379 | New gene model            |
| Gr36INT | 000403 | 626740   | 7238-16841     | +      | 3       | 374 | Second exon missing       |
| Gr37    | 018421 | 701157   | 1484-10355     | +      | 6       | 372 | Extra introns             |
| Gr38CTE | 013468 | 908024   | <17508-18416   | -      | -       | 303 | Last three exons missing  |
| Gr39CTE | 014940 | 953252   | 1139->2071     | +      | 1       | 311 | Last three exons missing  |

|         |        |        |                 |   |   |     |                           |
|---------|--------|--------|-----------------|---|---|-----|---------------------------|
| Gr40    | 800173 | 895205 | 28720-34708     | + | 3 | 397 | New gene model            |
| Gr41JI  | -      | 976502 | <1-1135         | - | 3 | 373 | Join across two scaffolds |
|         |        | 671510 | 176901->189177  | - |   |     | Second exon missing       |
| Gr42CTE | 008702 | 827442 | 6174->7127      | + | 1 | 318 | Last three exons missing  |
| Gr43CTE | 008702 | 827442 | 8389->9369      | + | 1 | 327 | Last three exons missing  |
| Gr44CTE | 008702 | 827442 | 11273->12205    | + | 1 | 311 | Last three exons missing  |
| Gr45CTE | -      | 660244 | 1213->1959      | + | 1 | 249 | Last three exons missing  |
| Gr46FC  | -      | 828673 | <1->519         | + | - | 200 | Fix assembly gap          |
|         |        |        |                 |   |   |     | Last three exons missing  |
| Gr47    | 800174 | 884190 | 15927-17192     | - | 0 | 421 | New gene model            |
| Gr48    | 800175 | 663085 | 56946-58130     | - | 0 | 394 | New gene model            |
| Gr49    | 800176 | 663085 | 62527-63657     | + | 0 | 376 | New gene model            |
| Gr50    | 800177 | 966800 | 5785-7014       | + | 0 | 409 | New gene model            |
| Gr51    | 800178 | 637704 | 96604-97833     | - | 0 | 409 | New gene model            |
| Gr52    | 800179 | 931786 | 315480-316709   | - | 0 | 409 | New gene model            |
| Gr53    | 800180 | 931786 | 328322-329596   | - | 0 | 424 | New gene model            |
| Gr54    | 800181 | 940066 | 661113-662393   | + | 0 | 426 | New gene model            |
| Gr55    | 800182 | 688611 | 441077-442354   | - | 0 | 425 | New gene model            |
| Gr56    | 800183 | 775741 | 1373-2533       | + | 0 | 386 | New gene model            |
| Gr57PSE | -      | 907737 | 45413-46569     | + | 0 | 386 | Pseudogene (8)            |
| Gr58PSE | -      | 894387 | 688->1690       | - | 0 | 325 | Pseudogene (9)            |
| Gr59NC  | 012263 | 921071 | <111821->112591 | + | 0 | 257 | Both ends missing         |
| Gr60NC  | -      | 663085 | <72725->73345   | - | 0 | 200 | Both ends missing         |
| Gr61    | 018260 | 714433 | 1067742-1076817 | + | 3 | 433 | Fine as is                |
| Gr62CTE | 011649 | 878513 | <4955-17506     | - | 1 | 307 | C-terminus missing        |

---

**Supplementary Table 30. *Ixodes scapularis* ionotropic glutamate receptors and ionotropic receptors**

| Gene Name   | VectorBase Accession | Scaffold | Start  | Stop   | Length (bp) | Introns | Comments <sup>1</sup> | Notes                                            |
|-------------|----------------------|----------|--------|--------|-------------|---------|-----------------------|--------------------------------------------------|
| IscaAMPAR01 | ISCW016542-PA        | DS647564 | 326210 | 285753 | 725         | 11      | -                     | No ATG                                           |
| IscaAMPAR02 | novel                | DS852167 | 93345  | 41206  | 719         | 11      | PSE                   | 1 frameshift                                     |
| IscaAMPAR03 | ISCW017534-PA        | DS674345 | 860787 | 894098 | 914         | 14      | -                     |                                                  |
| IscaAMPAR04 | ISCW017535-PA        | DS674345 | 896771 | 928186 | 878         | 12      | -                     | No ATG<br>4 frameshifts. No ATG.                 |
| IscaIR25a   | ISCW008225-PA        | DS776301 | 656    | 15191  | 627         | 5       | PSE, CTE              | Added N-term and C-term                          |
| IscaIR270.1 | ISCW014237-PA        | DS941993 | 1246   | 48375  | 526         | 6       | INT                   |                                                  |
| IscaIR270.2 | novel                | DS944343 | 445174 | 621659 | 770         | 8       | INT                   |                                                  |
| IscaIR271   | ISCW000549-PA        | DS643501 | 48779  | 30656  | 487         | 9       | -                     |                                                  |
| IscaIR272   | ISCW022000-PA        | DS917723 | 300652 | 307852 | 283         | 3       | NTE                   | No ATG. Added C-term, removed residues at N-term |
| IscaIR273   | ISCW006307-PA        | DS743451 | 18121  | 16238  | 628         | 0       | -                     |                                                  |
| IscaIR274   | ISCW015704-PA        | DS613622 | 176323 | 163863 | 398         | 5       | NTE                   |                                                  |
| IscaIR275   | ISCW020630-PA        | DS844967 | 256726 | 273694 | 429         | 5       | NTE                   | No ATG. Removed residues at N-term               |
| IscaIR276   | ISCW022877-PA        | DS911299 | 93493  | 103589 | 454         | 6       | -                     |                                                  |
| IscaIR277   | ISCW001635-PA        | DS618314 | 1505   | 19198  | 448         | 7       | -                     |                                                  |
| IscaIR278   | ISCW015703-PA        | DS613622 | 146719 | 160224 | 423         | 7       | -                     |                                                  |
| IscaIR279   | ISCW019302-PA        | DS809877 | 693067 | 708183 | 376         | 4       | NTE                   |                                                  |
| IscaIR280   | ISCW015107-PA        | DS979414 | 264628 | 258457 | 354         | 4       | NTE                   | No ATG                                           |
| IscaIR281   | ISCW010196-PA        | DS829427 | 63163  | 77406  | 347         | 5       | NTE                   |                                                  |
| IscaIR93a   | ISCW007957-PA        | DS778079 | 2881   | 36116  | 659         | 9       | -                     |                                                  |
| IscaKA01    | ISCW023268-PA        | DS954809 | 79910  | 4181   | 736         | 13      | CTE                   | No ATG                                           |
| IscaKA02    | novel                | DS683624 | 147641 | 132726 | 381         | 3       | PSE, NTE, CTE         | 1 internal stop codon. No ATG                    |
| IscaKA03    | ISCW001842-PA        | DS664102 | 467895 | 401477 | 761         | 10      | PSE                   | 1 frameshift. No ATG. Few edits                  |
| IscaKA04    | ISCW023274-PA        | DS954809 | 715472 | 675153 | 808         | 12      | -                     | No ATG                                           |
| IscaKA05    | ISCW008266-PA        | DS811111 | 136492 | 107642 | 870         | 12      | -                     |                                                  |
| IscaKA06    | ISCW012402-PA        | DS907449 | 324300 | 367939 | 728         | 11      | CTE                   | No ATG                                           |
| IscaKA07    | ISCW008263-PA        | DS811111 | 21039  | 8427   | 264         | 3       | NTE                   | No ATG                                           |

|             |               |          |        |        |      |    |   |                              |
|-------------|---------------|----------|--------|--------|------|----|---|------------------------------|
| IscaNMDAR01 | ISCW010976-PA | DS891848 | 1499   | 36711  | 582  | 9  | - | Few edits. No ATG.<br>Short? |
| IscaNMDAR02 | ISCW005598-PA | DS758678 | 464306 | 409871 | 854  | 13 | - | Few edits. No ATG            |
| IscaNMDAR03 | ISCW009282-PA | DS834911 | 299979 | 287443 | 1114 | 9  | - |                              |

---

<sup>†</sup>PSE = pseudogene; NTE = N-terminal end missing; CTE = C-terminal end missing; INT = internal gap.

**Supplementary Table 31. Putative Cys-loop and ionotropic glutamate ligand-gated ion channels in the *Ixodes scapularis* genome.**

| <b>Ion Channel</b>                        | <b>Acaricidal Compound</b> | <b>Subunits<br/><i>Ixodes</i></b> | <b>Subunits<br/><i>Drosophila</i></b> |
|-------------------------------------------|----------------------------|-----------------------------------|---------------------------------------|
| <b>Cys-loop ligand-gated ion channels</b> |                            |                                   |                                       |
| Nicotinic acetylcholine receptors         | Spinosyn                   | 12                                | 10                                    |
| GABA receptors                            | Fipronil                   | 4                                 | 3                                     |
| Glutamate-gated anion channels            | Ivermectin                 | 6                                 | 1                                     |
| Histamine-gated anion channels            | Ivermectin                 | 1                                 | 2                                     |
| pH-sensitive anion channels               | Ivermectin                 | 1                                 | 1                                     |
| Other subunits                            |                            | 8                                 | 5                                     |
| <b>Ionotropic glutamate receptors</b>     |                            |                                   |                                       |
| AMPA                                      |                            | 4                                 | 2                                     |
| Kainate                                   |                            | 7                                 | 10                                    |
| NMDA                                      |                            | 3                                 | 2                                     |
| IRs                                       |                            | 15 <sup>†</sup>                   | 66                                    |

<sup>†</sup>30 additional short sequence fragments encoding potential IRs were also identified.

**Supplementary Table 32. Proteins identified by LC-MS/MS of ISE6-*Anaplasma* infected *Ixodes scapularis* ISE6 cells.**

| <b>EARLY INFECTION</b>                  |             | <b>LATE INFECTION</b>                    |             |
|-----------------------------------------|-------------|------------------------------------------|-------------|
| <b>Over-expressed in infected cells</b> | <b>N=13</b> | <b>Under-expressed in infected cells</b> | <b>N=50</b> |
| Cell growth                             | 7.7%***     | Cell growth                              | 20.0%***    |
| Protein metabolism                      | 38.5%       | Protein metabolism                       | 30.0%       |
| Nucleic acid metabolism                 | 23.1%       | Nucleic acid metabolism                  | 14.0%       |
| Transport                               | 15.4%       | Transport                                | 6.0%        |
|                                         |             | Energy metabolism                        | 16.0%       |
|                                         |             | Cell communication                       | 6.0%        |
|                                         |             | Lipid metabolism                         | 0.0%        |
| Unknown                                 | 15.3%       | Unknown                                  | 8.0%        |
| <b>Up regulated in infected cells</b>   | <b>N=8</b>  | <b>Up regulated in infected cells</b>    | <b>N=31</b> |
| Cell growth                             | 12.5%***    | Cell growth                              | 3.2%***     |
| Protein metabolism                      | 37.5%       | Protein metabolism                       | 38.7%       |
| Nucleic acid metabolism                 | 25.0%       | Nucleic acid metabolism                  | 25.8%       |
| Transport                               | 0.0%*       | Transport                                | 0.0%*       |
|                                         |             | Energy metabolism                        | 9.7%        |
|                                         |             | Cell communication                       | 3.2%        |
|                                         |             | Lipid metabolism                         | 3.2%        |
| Unknown                                 | 25.0%       | Unknown                                  | 16.2%       |

Biological process protein ontology of differentially represented proteins between infected and uninfected tick cells during early and late infections (\* and \*\* indicate significant differences ( $p < 0.05$ ) between under- and over-represented proteins in both early and late infections and between early and late infections, respectively).

**Supplementary Table 33. Protein differential representation between *Anaplasma phagocytophilum*-early infected and control uninfected *Ixodes scapularis* ISE6 cells.**

| FASTA Protein Description                                                                                        | UNIPROT | Protein Name                                          | Fold Change <sup>a</sup> | FDR <sup>b</sup> | Biological Process <sup>c</sup> |
|------------------------------------------------------------------------------------------------------------------|---------|-------------------------------------------------------|--------------------------|------------------|---------------------------------|
| <b>Under-expressed in infected cells, N=13</b>                                                                   |         |                                                       |                          |                  |                                 |
| tr B7P2Q4 B7P2Q4_IxOSC Laminin, putative OS= <i>Ixodes scapularis</i> GN= <i>IscW</i> _ISCW000339                | B7P2Q4  | Laminin                                               | -2.53                    | 0.000            | Cell growth and/or maintenance  |
| tr B7P7F7 B7P7F7_IxOSC Heat shock protein, putative OS= <i>Ixodes scapularis</i> GN= <i>Isc</i>                  | B7P7F7  | HSP                                                   | -2.31                    | 0.004            | Protein metabolism              |
| tr B7P9E4 B7P9E4_IxOSC Na <sup>+</sup> /K <sup>+</sup> ATPase, alpha subunit, putative (Fragment) OS= <i>Ixo</i> | B7P9E4  | Na <sup>+</sup> /K <sup>+</sup> ATPase, alpha subunit | -2.14                    | 0.000            | Transport                       |
| tr B7P5B3 B7P5B3_IxOSC U5 snRNP-specific protein, putative (Fragment) OS= <i>Ixode</i>                           | B7P5B3  | U5 snRNP-specific protein                             | -2.04                    | 0.004            | Protein metabolism              |
| tr B7PMC3 B7PMC3_IxOSC Putative uncharacterized protein OS= <i>Ixodes scapularis</i> GN                          | B7PMC3  | Unknown                                               | -2.03                    | 0.000            | Unknown                         |
| tr B7P2T4 B7P2T4_IxOSC Ribosomal protein S17, putative OS= <i>Ixodes scapularis</i> GN                           | B7P2T4  | ribosomal protein S17                                 | -1.95                    | 0.004            | Protein metabolism              |
| tr B7PV22 B7PV22_IxOSC Poly [ADP-ribose] polymerase, putative OS= <i>Ixodes scapul</i>                           | B7PV22  | poly [ADP-ribose] polymerase                          | -1.94                    | 0.013            | Unknown                         |
| tr B7QDV1 B7QDV1_IxOSC Histone, putative OS= <i>Ixodes scapularis</i> GN= <i>IscW</i> _ISCW01223                 | B7QDV1  | histone                                               | -1.93                    | 0.000            | Nucleic acid metabolism         |
| tr B7P595 B7P595_IxOSC Proline and glutamine-rich splicing factor (SFPQ), puta                                   | B7P595  | proline and glutamine-rich splicing factor (SFPQ)     | -1.89                    | 0.003            | Nucleic acid metabolism         |
| tr B7PR83 B7PR83_IxOSC Ubiquitin conjugating enzyme E1, putative OS= <i>Ixodes scap</i>                          | B7PR83  | ubiquitin conjugating enzyme E1                       | -1.82                    | 0.000            | Protein metabolism              |
| tr B7P0P1 B7P0P1_IxOSC DNA topoisomerase 2 OS= <i>Ixodes scapularis</i> GN= <i>IscW</i> _ISCW01                  | B7P0P1  | DNA topoisomerase II                                  | -1.65                    | 0.002            | Nucleic acid metabolism         |
| tr B7QMV1 B7QMV1_IxOSC Elongation factor, putative OS= <i>Ixodes scapularis</i> GN= <i>IscW</i>                  | B7QMV1  | elongation factor 2 (eEF2)                            | -1.50                    | 0.000            | Protein metabolism              |
| tr B7P5X8 B7P5X8_IxOSC Voltage dependent anion selective channel, putative OS=                                   | B7P5X8  | voltage-dependent anion-selective channel (mt)        | -1.33                    | 0.028            | Transport                       |
| <b>Over-expressed in infected cells, N=8</b>                                                                     |         |                                                       |                          |                  |                                 |
| tr A6N9P0 A6N9P0_ORNPR 40S ribosomal protein S14 OS= <i>Ornithodoros parkeri</i> PE=2 S                          | A6N9P0  | ribosomal protein S14                                 | + 1.69                   | 0.000            | Protein metabolism              |
| tr B7Q0Q1 B7Q0Q1_IxOSC Putative uncharacterized protein (Fragment) OS= <i>Ixodes sc</i>                          | B7Q0Q1  | Unknown                                               | + 1.78                   | 0.002            | Unknown                         |
| tr B7PZ14 B7PZ14_IxOSC RNA binding protein, putative OS= <i>Ixodes scapularis</i> GN= <i>I</i>                   | B7PZ14  | RNA-binding protein                                   | + 1.83                   | 0.011            | Nucleic acid metabolism         |

|                                                                                 |        |                                                  |         |       |                                |
|---------------------------------------------------------------------------------|--------|--------------------------------------------------|---------|-------|--------------------------------|
| tr B7P3Q5 B7P3Q5_IXOSC Vasa intronic protein, putative OS=Ixodes scapularis GN  | B7P3Q5 | vasa intronic protein                            | + 2.01  | 0.000 | Nucleic acid metabolism        |
| tr B7QD48 B7QD48_IXOSC Putative uncharacterized protein (Fragment) OS=Ixodes sc | B7QD48 | Unknown                                          | + 2.35  | 0.037 | Unknown                        |
| tr B7PSQ6 B7PSQ6_IXOSC 40S ribosomal protein S3A, putative OS=Ixodes scapularis | B7PSQ6 | 40S ribosomal protein S3A                        | + 3.10  | 0.004 | Protein metabolism             |
| tr B2YGD3 B2YGD3_9ARAC Actin (Fragment) OS=Galianora bryicola PE=4 SV=1         | B2YGD3 | actin                                            | + 3.27  | 0.027 | Cell growth and/or maintenance |
| tr B7PXR5 B7PXR5_IXOSC Chaperonin complex component, TCP-1 eta subunit, putativ | B7PXR5 | chaperonin complex component, TCP-1b eta subunit | + 11.92 | 0.004 | Protein metabolism             |

<sup>a</sup> + indicates a significant increase in protein levels and - indicates a significant decrease in protein levels in infected cells ( $p < 0.05$ ).

<sup>b</sup>False discovery rate (FDR) associated to protein identification.

<sup>c</sup>Protein ontology for biological process determined using human protein databases at:

<http://www.hprd.org/> and <http://www.ebi.ac.uk/interpro/>

**Supplementary Table 34. Protein differential representation between *Anaplasma phagocytophilum*-late infected and control uninfected *Ixodes scapularis* ISE6 cells.**

| FASTA Protein Description                                                                                | UNIPROT | Protein Name                                           | Fold Change <sup>a</sup> | FDR <sup>b</sup> | Biological Process <sup>c</sup>         |
|----------------------------------------------------------------------------------------------------------|---------|--------------------------------------------------------|--------------------------|------------------|-----------------------------------------|
| <b>Under-expressed in infected cells, N=50</b>                                                           |         |                                                        |                          |                  |                                         |
| tr B7P7F7 B7P7F7_IXOSC Heat shock protein, putative OS= <i>Ixodes scapularis</i> GN=Isc                  | B7P7F7  | HSP                                                    | -5.81                    | 0.004            | Protein metabolism                      |
| tr B7P2Q4 B7P2Q4_IXOSC Laminin, putative OS= <i>Ixodes scapularis</i> GN=IscW_ISCW000339                 | B7P2Q4  | Laminin B                                              | -5.64                    | 0.000            | Cell growth and/or maintenance          |
| tr B7P595 B7P595_IXOSC Proline and glutamine-rich splicing factor (SFPQ), puta                           | B7P595  | proline and glutamine-rich splicing factor (SFPQ)      | -2.73                    | 0.003            | Nucleic acid metabolism                 |
| tr B7P0P1 B7P0P1_IXOSC DNA topoisomerase 2 OS= <i>Ixodes scapularis</i> GN=IscW_ISCW01                   | B7P0P1  | DNA topoisomerase II                                   | -2.66                    | 0.002            | Nucleic acid metabolism                 |
| tr B7P9E4 B7P9E4_IXOSC Na <sup>+</sup> /K <sup>+</sup> ATPase, alpha subunit, putative (Fragment) OS=Ixo | B7P9E4  | Na <sup>+</sup> /K <sup>+</sup> ATPase, alpha subunit  | -2.38                    | 0.000            | Transport                               |
| tr B7P3D3 B7P3D3_IXOSC FKBP-type peptidyl-prolyl cis-trans isomerase, putative                           | B7P3D3  | FKBP-type peptidyl-prolyl cis-trans isomerase          | -2.27                    | 0.037            | Protein metabolism                      |
| tr B7P1C8 B7P1C8_IXOSC Protein hu-li tai shao, putative OS= <i>Ixodes scapularis</i> GN                  | B7P1C8  | protein hu-li tai shao, Adducin                        | -2.17                    | 0.000            | Cell growth and/or maintenance          |
| tr B7Q1Y2 B7Q1Y2_IXOSC 6-phosphogluconate dehydrogenase, decarboxylating (Frag                           | B7Q1Y2  | 6-phosphogluconate dehydrogenase                       | -2.15                    | 0.003            | Energy metabolism                       |
| tr B7P230 B7P230_IXOSC Translation initiation factor 2C, putative OS= <i>Ixodes sc</i>                   | B7P230  | translation initiation factor 2C                       | -2.08                    | 0.015            | Protein metabolism                      |
| tr B7QDV1 B7QDV1_IXOSC Histone, putative OS= <i>Ixodes scapularis</i> GN=IscW_ISCW01223                  | B7QDV1  | histone                                                | -2.06                    | 0.000            | Nucleic acid metabolism                 |
| tr B7P5B3 B7P5B3_IXOSC U5 snRNP-specific protein, putative (Fragment) OS=Ixode                           | B7P5B3  | U5 snRNP-specific protein                              | -2.05                    | 0.004            | Protein metabolism                      |
| tr B7P8J4 B7P8J4_IXOSC ATP-dependent RNA helicase, putative (Fragment) OS=Ixode                          | B7P8J4  | ATP-dependent RNA helicase                             | -2.02                    | 0.027            | Nucleic acid metabolism                 |
| tr B7PAS1 B7PAS1_IXOSC MCM2 protein, putative (Fragment) OS= <i>Ixodes scapularis</i>                    | B7PAS1  | MCM2; Predicted ATPase involved in replication control | -1.99                    | 0.010            | Cell growth and/or maintenance          |
| tr B7PSE0 B7PSE0_IXOSC Ribosomal protein L4, putative OS= <i>Ixodes scapularis</i> GN=I                  | B7PSE0  | ribosomal protein L4                                   | -1.96                    | 0.000            | Protein metabolism                      |
| tr B7Q5Y2 B7Q5Y2_IXOSC Prohibitin, putative OS= <i>Ixodes scapularis</i> GN=IscW_ISCW0                   | B7Q5Y2  | prohibitin                                             | -1.92                    | 0.000            | Cell communication; Signal transduction |
| tr B7PKP8 B7PKP8_IXOSC Spermidine synthase, putative OS= <i>Ixodes scapularis</i> GN=I                   | B7PKP8  | spermidine synthase                                    | -1.83                    | 0.000            | Energy metabolism                       |
| tr B7PKR5 B7PKR5_IXOSC Glutamyl-tRNA synthetase, cytoplasmic, putative OS=Ixode                          | B7PKR5  | glutamyl-tRNA synthetase                               | -1.82                    | 0.000            | Protein metabolism                      |

|                                                                                 |        |                                                                                                                       |       |       |                                         |
|---------------------------------------------------------------------------------|--------|-----------------------------------------------------------------------------------------------------------------------|-------|-------|-----------------------------------------|
| tr B7PQP7 B7PQP7_IXOSC Hydroxyacyl-CoA dehydrogenase, putative (Fragment) OS=Ix | B7PQP7 | hydroxyacyl-CoA dehydrogenase                                                                                         | -1.81 | 0.000 | Energy metabolism                       |
| tr B7PMC3 B7PMC3_IXOSC Putative uncharacterized protein OS=Ixodes scapularis GN | B7PMC3 | Unknown                                                                                                               | -1.81 | 0.000 | Unknown                                 |
| tr B7QC74 B7QC74_IXOSC Transcription factor containing NAC and TS-N domains, pu | B7QC74 | transcription factor containing NAC and TS-N domains                                                                  | -1.73 | 0.020 | Nucleic acid metabolism                 |
| tr B7PKQ6 B7PKQ6_IXOSC Cell division protein, putative (Fragment) OS=Ixodes sca | B7PKQ6 | cell division protein                                                                                                 | -1.72 | 0.027 | Cell growth and/or maintenance          |
| tr B7QFX7 B7QFX7_IXOSC RAB-9 and, putative OS=Ixodes scapularis GN=IscW_ISCW021 | B7QFX7 | RAB-9, small Rab GTPase that regulates vesicular traffic from early to late endosomal stages of the endocytic pathway | -1.71 | 0.000 | Cell communication; Signal transduction |
| tr B7PUR9 B7PUR9_IXOSC Failed axon connections, putative OS=Ixodes scapularis G | B7PUR9 | failed axon connections                                                                                               | -1.69 | 0.000 | Unknown                                 |
| tr B7PA04 B7PA04_IXOSC Putative uncharacterized protein OS=Ixodes scapularis G  | B7PA04 | Unknown                                                                                                               | -1.68 | 0.004 | Unknown                                 |
| tr B7PV22 B7PV22_IXOSC Poly [ADP-ribose] polymerase, putative OS=Ixodes scapul  | B7PV22 | poly [ADP-ribose] polymerase                                                                                          | -1.65 | 0.013 | Unknown                                 |
| tr B7PRG2 B7PRG2_IXOSC 60S acidic ribosomal protein P0, putative OS=Ixodes sca  | B7PRG2 | 60S acidic ribosomal protein P0                                                                                       | -1.62 | 0.044 | Protein metabolism                      |
| tr B7P573 B7P573_IXOSC Processing peptidase beta subunit, putative OS=Ixodes sc | B7P573 | processing peptidase beta subunit                                                                                     | -1.59 | 0.011 | Protein metabolism                      |
| tr B7PIZ1 B7PIZ1_IXOSC GDI-1 GDP dissociation inhibitor, putative (Fragment) O  | B7PIZ1 | GDI-1 GDP dissociation inhibitor                                                                                      | -1.58 | 0.000 | Cell communication; Signal transduction |
| tr B7P289 B7P289_IXOSC Prolyl 4-hydroxylase alpha subunit, putative OS=Ixodes s | B7P289 | prolyl 4-hydroxylase alpha subunit                                                                                    | -1.58 | 0.003 | Protein metabolism                      |
| tr B7PVI7 B7PVI7_IXOSC RNA-binding protein musashi, putative OS=Ixodes scapula  | B7PVI7 | RNA-binding protein musashi                                                                                           | -1.56 | 0.002 | Nucleic acid metabolism                 |
| tr B7QMV1 B7QMV1_IXOSC Elongation factor, putative OS=Ixodes scapularis GN=IscW | B7QMV1 | elongation factor 2 (eEF2)                                                                                            | -1.55 | 0.000 | Protein metabolism                      |
| tr B7QM86 B7QM86_IXOSC Talin, putative OS=Ixodes scapularis GN=IscW_ISCW023338  | B7QM86 | Talin, cytoskeletal associated protein                                                                                | -1.51 | 0.000 | Cell growth and/or maintenance          |
| tr B7PCN1 B7PCN1_IXOSC Aldo-keto reductase, putative OS=Ixodes scapularis GN=Is | B7PCN1 | aldo-keto reductase                                                                                                   | -1.47 | 0.004 | Energy metabolism                       |
| tr B7Q3Z3 B7Q3Z3_IXOSC 26S proteasome regulatory subunit rpn1, putative OS=Ixo  | B7Q3Z3 | 26S proteasome regulatory subunit rpn1                                                                                | -1.47 | 0.048 | Protein metabolism                      |
| tr A4UTU3 A4UTU3_DERVA Beta-actin OS=Dermacentor variabilis PE=2 SV=2           | A4UTU3 | Beta actin                                                                                                            | -1.46 | 0.000 | Cell growth and/or maintenance          |

|                                                                                 |        |                                                |        |       |                                |
|---------------------------------------------------------------------------------|--------|------------------------------------------------|--------|-------|--------------------------------|
| tr B2D2D4 B2D2D4_9ACAR Translation elongation factor EF-1 alpha/Tu (Fragment)   | B2D2D4 | Translation elongation factor EF-1 alpha/Tu    | -1.45  | 0.000 | Protein metabolism             |
| tr B7P1Z8 B7P1Z8_IXOSC Heat shock protein, putative OS=Ixodes scapularis GN=Is  | B7P1Z8 | HSP                                            | -1.45  | 0.016 | Protein metabolism             |
| tr B7QMD6 B7QMD6_IXOSC Transaldolase, putative OS=Ixodes scapularis GN=IscW_ISC | B7QMD6 | transaldolase                                  | -1.43  | 0.000 | Energy metabolism              |
| tr B7QIJ3 B7QIJ3_IXOSC Quinone oxidoreductase, putative (Fragment) OS=Ixodes s  | B7QIJ3 | quinone oxidoreductase                         | -1.41  | 0.000 | Energy metabolism              |
| tr B7P5X8 B7P5X8_IXOSC Voltage-dependent anion-selective channel, putative OS=  | B7P5X8 | voltage-dependent anion-selective channel (mt) | -1.40  | 0.028 | Transport                      |
| tr Q6X4W3 Q6X4W3_HAELO Actin OS=Haemaphysalis longicornis GN=Act1 PE=2 SV=1     | Q6X4W3 | Actin                                          | -1.40  | 0.000 | Cell growth and/or maintenance |
| tr B7P1U8 B7P1U8_IXOSC Spectrin alpha chain, putative OS=Ixodes scapularis GN=  | B7P1U8 | spectrin alpha chain, cytoskeletal protein     | -1.39  | 0.000 | Cell growth and/or maintenance |
| tr B7PGM6 B7PGM6_IXOSC G-3-P dehydrogenase, putative (Fragment) OS=Ixodes scapu | B7PGM6 | Glyceraldehyde 3-phosphate dehydrogenase       | -1.39  | 0.000 | Energy metabolism              |
| sp Q8WQ47 TBA_LEPDS Tubulin alpha chain OS=Lepidoglyphus destructor PE=1 SV=2   | Q8WQ4  | Alpha tubulin                                  | -1.37  | 0.000 | Cell growth and/or maintenance |
| tr B7QMW0 B7QMW0_IXOSC Fatty acid-binding protein FABP, putative OS=Ixodes sca  | B7QMW0 | fatty acid-binding protein FABP                | -1.34  | 0.000 | Transport                      |
| tr A8UY20 A8UY20_9ACAR Elongation factor 1-alpha (Fragment) OS=Hypochthonius I  | A8UY20 | elongation factor -alpha (eEF1a)               | -1.32  | 0.003 | Protein metabolism             |
| tr B7PG97 B7PG97_IXOSC Transcription factor NFAT, subunit NF45, putative (Frag  | B7PG97 | transcription factor NFAT, subunit NF45        | -1.31  | 0.011 | Nucleic acid metabolism        |
| tr B7PD56 B7PD56_IXOSC cyclophilin B precursor OS=Ixodes scapularis             | B7PD56 | cyclophilin B precursor                        | -1.31  | 0.003 | Protein metabolism             |
| tr B7Q0D4 B7Q0D4_IXOSC Fumarylacetoacetase, putative OS=Ixodes scapularis GN=Is | B7Q0D4 | fumarylacetoacetase                            | -1.27  | 0.015 | Energy metabolism              |
| tr B7PA92 B7PA92_IXOSC Beta tubulin OS=Ixodes scapularis GN=IscW_ISCW017133 PE  | B7PA92 | beta tubulin                                   | -1.27  | 0.003 | Cell growth and/or maintenance |
| <b>Over-expressed in Infected cells, N=31</b>                                   |        |                                                |        |       |                                |
| tr B7PEN4 B7PEN4_IXOSC Heat shock protein, putative OS=Ixodes scapularis GN=Is  | B7PEN4 | HSP70                                          | + 1.20 | 0.011 | Protein metabolism             |
| tr B4YTT8 B4YTT8_9ACAR Heat shock protein 70-1 OS=Tetranychus cinnabarinus PE=2 | B4YTT8 | HSP70-1                                        | + 1.30 | 0.002 | Protein metabolism             |
| tr B7Q6Z1 B7Q6Z1_IXOSC Saposin, putative                                        | B7Q6Z1 | saposin                                        | + 1.37 | 0.000 | Lipid metabolism               |

|                                                                                 |                 |                                                          |        |       |                         |
|---------------------------------------------------------------------------------|-----------------|----------------------------------------------------------|--------|-------|-------------------------|
| OS=Ixodes scapularis GN=IscW_ISCW01159                                          |                 |                                                          |        |       |                         |
| tr B4YTT9 B4YTT9_9ACAR Heat shock protein 702 OS=Tetranychus cinnabarinus PE=   | B4YTT9          | HSP70-2                                                  | + 1.42 | 0.000 | Protein metabolism      |
| tr IscW_ISCW008184 IscW_ISCW008184                                              | IscW_ISCW008184 | calreticulin, chaperone activity                         | + 1.46 | 0.000 | Protein metabolism      |
| Calreticulin (Fragment) OS=Ixodes scapularis                                    |                 |                                                          |        |       |                         |
| tr B7P591 B7P591_IXOSC                                                          | B7P591          | phosphoribosylamidoimidazole-succinocarboxamide synthase | + 1.46 | 0.000 | Nucleic acid metabolism |
| Phosphoribosylamidoimidazole succinocarboxamide synthas                         |                 |                                                          |        |       |                         |
| tr B7PV15 B7PV15_IXOSC                                                          | B7PV15          | glyoxylate/hydroxypyruvate reductase                     | + 1.48 | 0.000 | Energy metabolism       |
| Glyoxylate/hydroxypyruvate reductase, putative OS=Ixodes                        |                 |                                                          |        |       |                         |
| tr B7PKH2 B7PKH2_IXOSC Mcm2/3, putative (Fragment) OS=Ixodes scapularis GN=Isc  | B7PKH2          | minichromosome maintenance protein Mcm2/3                | + 1.49 | 0.030 | Nucleic acid metabolism |
| tr B7PBW3 B7PBW3_IXOSC Protein disulfide isomerase 1, putative OS=Ixodes scapu  | B7PBW3          | protein disulfide isomerase 1                            | + 1.53 | 0.050 | Protein metabolism      |
| tr B7PEL0 B7PEL0_IXOSC Tetraspanin, putative OS=Ixodes scapularis GN=IscW_ISCW  | B7PEL0          | tetraspanin                                              | + 1.57 | 0.000 | Unknown                 |
| tr B7PRN8 B7PRN8_IXOSC Brain acid soluble protein, putative OS=Ixodes scapular  | B7PRN8          | brain acid soluble protein                               | + 1.58 | 0.018 | Nucleic acid metabolism |
| tr A6N9M1 A6N9M1_ORNPR 40S ribosomal protein S2/30S OS=Ornithodoros parkeri PE= | A6N9M1          | 40S ribosomal protein S2/30S                             | + 1.68 | 0.017 | Protein metabolism      |
| tr B7PH44 B7PH44_IXOSC Malate dehydrogenase, putative OS=Ixodes scapularis GN=I | B7PH44          | malate dehydrogenase                                     | + 1.72 | 0.000 | Energy metabolism       |
| sp Q09JT4 RL38_ARGMO 60S ribosomal protein L38 OS=Argas monolakensis GN=RpL38   | Q09JT4          | 60S ribosomal protein L38                                | + 1.90 | 0.003 | Protein metabolism      |
| tr B7QF39 B7QF39_IXOSC Transcription factor Mbf1, putative OS=Ixodes scapulari  | B7QF39          | Transcription factor Mbf1                                | + 2.02 | 0.003 | Nucleic acid metabolism |
| tr B5M799 B5M799_9ACAR Histone H2B OS=Amblyomma americanum PE=2 SV=1            | B5M799          | Histone H2B                                              | + 2.06 | 0.048 | Nucleic acid metabolism |
| tr B7QF45 B7QF45_IXOSC 3 ketoacyl CoA thiolase, putative OS=Ixodes scapularis   | B7QF45          | 3-keto-acyl-CoA thiolase                                 | + 2.13 | 0.032 | Protein metabolism      |
| tr B7Q1Y8 B7Q1Y8_IXOSC Putative uncharacterized protein OS=Ixodes scapularis G  | B7Q1Y8          | Unknown                                                  | + 2.18 | 0.039 | Unknown                 |
| tr B7PZ14 B7PZ14_IXOSC RNA binding protein, putative OS=Ixodes scapularis GN=I  | B7PZ14          | RNA-binding protein                                      | + 2.20 | 0.011 | Nucleic acid metabolism |
| tr B7Q5H9 B7Q5H9_IXOSC Fructose bisphosphate aldolase OS=Ixodes scapularis      | B7Q5H9          | fructose 1,6-bisphosphate aldolase                       | + 2.23 | 0.004 | Energy metabolism       |

GN=I

|                                                                                      |        |                                                        |         |       |                                            |
|--------------------------------------------------------------------------------------|--------|--------------------------------------------------------|---------|-------|--------------------------------------------|
| tr B7PHT2 B7PHT2_IXOSC Histone H2A<br>OS=Ixodes scapularis GN=IscW_ISCW004478<br>PE= | B7PHT2 | Histone H2A                                            | + 2.72  | 0.000 | Nucleic acid<br>metabolism                 |
| tr B7Q645 B7Q645_IXOSC Secreted salivary<br>gland peptide, putative (Fragment) OS    | B7Q645 | secreted salivary gland<br>peptide                     | + 2.81  | 0.000 | Protein metabolism                         |
| tr B7Q4T5 B7Q4T5_IXOSC Putative<br>uncharacterized protein OS=Ixodes scapularis GN   | B7Q4T5 | Unknown                                                | + 2.83  | 0.000 | Unknown                                    |
| tr B7Q0Q1 B7Q0Q1_IXOSC Putative<br>uncharacterized protein (Fragment) OS=Ixodes sc   | B7Q0Q1 | Unknown                                                | + 2.91  | 0.002 | Unknown                                    |
| tr B7PB95 B7PB95_IXOSC Stathmin OS=Ixodes<br>scapularis GN=IscW_ISCW003366 PE=3 S    | B7PB95 | stathmin                                               | + 2.96  | 0.000 | Cell communication;<br>Signal transduction |
| tr B7QD48 B7QD48_IXOSC Putative<br>uncharacterized protein (Fragment) OS=Ixodes sc   | B7QD48 | Unknown                                                | + 3.14  | 0.037 | Unknown                                    |
| tr A6N9P0 A6N9P0_ORNPR 40S ribosomal<br>protein S14 OS=Ornithodoros parkeri PE=2 S   | A6N9P0 | ribosomal protein S14                                  | + 3.22  | 0.000 | Protein metabolism                         |
| tr B7PKZ9 B7PKZ9_IXOSC BRI1 KD interacting<br>protein, putative OS=Ixodes scapula    | B7PKZ9 | BRI1-KD interacting<br>protein                         | + 3.98  | 0.014 | Protein metabolism                         |
| tr Q86G66 Q86G66_DERVA Putative beta<br>thymosin OS=Dermacentor variabilis PE=2 SV   | Q86G66 | beta thymosin                                          | + 4.68  | 0.000 | Cell growth and/or<br>maintenance          |
| tr B7P3Q5 B7P3Q5_IXOSC Vasa intronic protein,<br>putative OS=Ixodes scapularis GN    | B7P3Q5 | vasa intronic protein                                  | + 4.81  | 0.000 | Nucleic acid<br>metabolism                 |
| tr B7PXR5 B7PXR5_IXOSC Chaperonin complex<br>component, TCP1 eta subunit, putativ    | B7PXR5 | chaperonin complex<br>component, TCP-1b eta<br>subunit | + 16.16 | 0.004 | Protein metabolism                         |

<sup>a</sup> + indicates a significant increase in protein levels and - indicates a significant decrease in protein levels in infected cells (p < 0.05).

<sup>b</sup> False discovery rate (FDR) associated to protein identification.

<sup>c</sup> Protein ontology for biological process determined using human protein databases at:

<http://www.hprd.org/> and <http://www.ebi.ac.uk/interpro/>

**Supplementary Table 35. Protein identification in *Ixodes scapularis* ISE6 cells infected with *Anaplasma phagocytophilum*.**

| FASTA protein Description                                                                 | Species                         | No. Peptides <sup>a</sup> | FDR <sup>b</sup> |
|-------------------------------------------------------------------------------------------|---------------------------------|---------------------------|------------------|
| <b>Proteins identified with FDR &lt;1%</b>                                                |                                 |                           |                  |
| tr B7PEV0 B7PEV0_IxOSC Chaperonin subunit, putative OS= <i>Ixodes scapularis</i> GN=Isc   | <i>Ixodes scapularis</i>        | 12                        | 0.000            |
| sp Q8WQ47 TBA_LEPDS Tubulin alpha chain OS= <i>Lepidoglyphus destructor</i> PE=1 SV=2     | <i>Lepidoglyphus destructor</i> | 10                        | 0.000            |
| tr B7PEN4 B7PEN4_IxOSC Heat shock protein, putative OS= <i>Ixodes scapularis</i> GN=Isc   | <i>Ixodes scapularis</i>        | 10                        | 0.000            |
| tr B7QI01 B7QI01_IxOSC Hsp90 protein, putative OS= <i>Ixodes scapularis</i> GN=IscW_IS    | <i>Ixodes scapularis</i>        | 9                         | 0.000            |
| tr B7P1U8 B7P1U8_IxOSC Spectrin alpha chain, putative OS= <i>Ixodes scapularis</i> GN=    | <i>Ixodes scapularis</i>        | 8                         | 0.000            |
| tr B7Q5X7 B7Q5X7_IxOSC Vinculin, putative OS= <i>Ixodes scapularis</i> GN=IscW_ISCW0214   | <i>Ixodes scapularis</i>        | 8                         | 0.000            |
| tr B7Q9F1 B7Q9F1_IxOSC Protein disulfide isomerase, putative OS= <i>Ixodes scapularis</i> | <i>Ixodes scapularis</i>        | 8                         | 0.000            |
| tr B7QIT3 B7QIT3_IxOSC Putative uncharacterized protein OS= <i>Ixodes scapularis</i> GN   | <i>Ixodes scapularis</i>        | 7                         | 0.000            |
| tr B7P8Q5 B7P8Q5_IxOSC Hsp70, putative (Fragment) OS= <i>Ixodes scapularis</i> GN=IscW    | <i>Ixodes scapularis</i>        | 6                         | 0.000            |
| tr B7Q0J9 B7Q0J9_IxOSC Peptidyl-prolyl cis-trans isomerase OS= <i>Ixodes scapularis</i>   | <i>Ixodes scapularis</i>        | 6                         | 0.000            |
| tr B7QAM1 B7QAM1_IxOSC Chaperonin complex component, TCP-1 theta subunit, putat           | <i>Ixodes scapularis</i>        | 6                         | 0.000            |
| tr B7QC85 B7QC85_IxOSC Tumor rejection antigen (Gp96), putative (Fragment) OS=I           | <i>Ixodes scapularis</i>        | 6                         | 0.000            |
| tr B7QM86 B7QM86_IxOSC Talin, putative OS= <i>Ixodes scapularis</i> GN=IscW_ISCW023338    | <i>Ixodes scapularis</i>        | 6                         | 0.000            |
| tr B7QMV1 B7QMV1_IxOSC Elongation factor, putative OS= <i>Ixodes scapularis</i> GN=IscW   | <i>Ixodes scapularis</i>        | 6                         | 0.000            |
| tr B7P3Z6 B7P3Z6_IxOSC Chaperonin complex component, TCP-1 gamma subunit, putat           | <i>Ixodes scapularis</i>        | 5                         | 0.000            |
| tr B7P4U1 B7P4U1_IxOSC Protein disulfide isomerase, putative OS= <i>Ixodes scapularis</i> | <i>Ixodes scapularis</i>        | 5                         | 0.000            |
| tr B7PA92 B7PA92_IxOSC Beta tubulin OS= <i>Ixodes scapularis</i> GN=IscW_ISCW017133 PE=   | <i>Ixodes scapularis</i>        | 5                         | 0.000            |
| tr B7PG97 B7PG97_IxOSC Transcription factor NFAT, subunit NF45, putative (Fragm           | <i>Ixodes scapularis</i>        | 5                         | 0.000            |
| tr B7PN34 B7PN34_IxOSC KH domain RNA binding protein, putative (Fragment) OS=Ix           | <i>Ixodes scapularis</i>        | 5                         | 0.000            |
| tr B7PUR9 B7PUR9_IxOSC Failed axon connections, putative OS= <i>Ixodes scapularis</i> G   | <i>Ixodes scapularis</i>        | 5                         | 0.000            |
| tr B7PX63 B7PX63_IxOSC Zinc finger protein, putative OS= <i>Ixodes scapularis</i> GN=Is   | <i>Ixodes scapularis</i>        | 5                         | 0.000            |
| tr B7Q0D4 B7Q0D4_IxOSC Fumarylacetoacetase, putative OS= <i>Ixodes scapularis</i> GN=Is   | <i>Ixodes scapularis</i>        | 5                         | 0.000            |
| tr B7QE46 B7QE46_IxOSC ATP synthase subunit beta OS= <i>Ixodes scapularis</i> GN=IscW_    | <i>Ixodes scapularis</i>        | 5                         | 0.000            |
| tr B5AHF4 B5AHF4_9ACAR Heat shock protein 90 OS= <i>Tetranychus cinnabarinus</i> PE=2 S   | <i>Tetranychus cinnabarinus</i> | 5                         | 0.000            |
| tr A4UTU3 A4UTU3_DERVA Beta-actin OS= <i>Dermacentor variabilis</i> PE=2 SV=2             | <i>Dermacentor variabilis</i>   | 5                         | 0.000            |
| tr A0S0Q6 A0S0Q6_9ACAR Actin (Fragment) OS= <i>Neoseiulus womersleyi</i> PE=2 SV=1        | <i>Neoseiulus womersleyi</i>    | 4                         | 0.000            |
| tr B7P1Z8 B7P1Z8_IxOSC Heat shock protein, putative OS= <i>Ixodes scapularis</i> GN=Isc   | <i>Ixodes scapularis</i>        | 4                         | 0.000            |
| tr B7PAR6 B7PAR6_IxOSC Heat shock protein, putative OS= <i>Ixodes scapularis</i> GN=Isc   | <i>Ixodes scapularis</i>        | 4                         | 0.000            |

|                                                                                  |                                 |   |       |
|----------------------------------------------------------------------------------|---------------------------------|---|-------|
| tr B7PH44 B7PH44_I_XOSC Malate dehydrogenase, putative OS=Ixodes scapularis GN=I | <i>Ixodes scapularis</i>        | 4 | 0.000 |
| tr B7PIM5 B7PIM5_I_XOSC CNDP dipeptidase, putative (Fragment) OS=Ixodes scapular | <i>Ixodes scapularis</i>        | 4 | 0.000 |
| tr B7Q5G8 B7Q5G8_I_XOSC Spectrin beta chain, putative OS=Ixodes scapularis GN=Is | <i>Ixodes scapularis</i>        | 4 | 0.000 |
| tr B7Q5Y2 B7Q5Y2_I_XOSC Prohibitin, putative OS=Ixodes scapularis GN=IscW_ISCW0  | <i>Ixodes scapularis</i>        | 4 | 0.000 |
| tr B7QCK2 B7QCK2_I_XOSC ATP synthase subunit alpha OS=Ixodes scapularis GN=IscW_ | <i>Ixodes scapularis</i>        | 4 | 0.000 |
| tr B7QJ21 B7QJ21_I_XOSC Chaperonin complex component, TCP-1 eta subunit, putati  | <i>Ixodes scapularis</i>        | 4 | 0.000 |
| tr B5M6E6 B5M6E6_HAPSC Beta tubulin OS=Haplopelma schmidt PE=2 SV=1              | <i>Haplopelma schmidt</i>       | 4 | 0.000 |
| tr A1KXJ1 A1KXJ1_BLOTA Blo t Mag29 allergen OS=Blomia tropicalis PE=2 SV=1       | <i>Blomia tropicalis</i>        | 3 | 0.000 |
| tr B7P0M7 B7P0M7_I_XOSC Aldehyde dehydrogenase, putative (Fragment) OS=Ixodes s  | <i>Ixodes scapularis</i>        | 3 | 0.000 |
| tr B7P5X8 B7P5X8_I_XOSC Voltage-dependent anion-selective channel, putative OS=I | <i>Ixodes scapularis</i>        | 3 | 0.000 |
| tr B7PAB9 B7PAB9_I_XOSC Methylmalonate semialdehyde dehydrogenase, putative OS=I | <i>Ixodes scapularis</i>        | 3 | 0.000 |
| tr B7PDF3 B7PDF3_I_XOSC FKBP-type peptidyl-prolyl cis-trans isomerase, putative  | <i>Ixodes scapularis</i>        | 3 | 0.000 |
| tr B7PHC3 B7PHC3_I_XOSC Carbon-nitrogen hydrolase, putative OS=Ixodes scapularis | <i>Ixodes scapularis</i>        | 3 | 0.000 |
| tr B7PHJ5 B7PHJ5_I_XOSC Cytochrome b5 domain-containing protein, putative (Fragm | <i>Ixodes scapularis</i>        | 3 | 0.000 |
| tr B7PKG2 B7PKG2_I_XOSC Fasciclin domain-containing protein, putative OS=Ixodes  | <i>Ixodes scapularis</i>        | 3 | 0.000 |
| tr B7PKR5 B7PKR5_I_XOSC Glutamyl-tRNA synthetase, cytoplasmic, putative OS=Ixode | <i>Ixodes scapularis</i>        | 3 | 0.000 |
| tr B7PRN8 B7PRN8_I_XOSC Brain acid soluble protein, putative OS=Ixodes scapular  | <i>Ixodes scapularis</i>        | 3 | 0.000 |
| tr B7PSE0 B7PSE0_I_XOSC Ribosomal protein L4, putative OS=Ixodes scapularis GN=I | <i>Ixodes scapularis</i>        | 3 | 0.000 |
| tr B7PV15 B7PV15_I_XOSC Glyoxylate/hydroxypyruvate reductase, putative OS=Ixodes | <i>Ixodes scapularis</i>        | 3 | 0.000 |
| tr B7Q5I4 B7Q5I4_I_XOSC Multifunctional chaperone, putative OS=Ixodes scapulari  | <i>Ixodes scapularis</i>        | 3 | 0.000 |
| tr B7Q5L2 B7Q5L2_I_XOSC Calponin, putative OS=Ixodes scapularis GN=IscW_ISCW021  | <i>Ixodes scapularis</i>        | 3 | 0.000 |
| tr B7QEE0 B7QEE0_I_XOSC Hypoxia up-regulated protein, putative OS=Ixodes scapula | <i>Ixodes scapularis</i>        | 3 | 0.000 |
| tr B7QGH2 B7QGH2_I_XOSC Glutathione S-transferase, putative OS=Ixodes scapularis | <i>Ixodes scapularis</i>        | 3 | 0.000 |
| tr B7QMW0 B7QMW0_I_XOSC Fatty acid-binding protein FABP, putative OS=Ixodes sca  | <i>Ixodes scapularis</i>        | 3 | 0.000 |
| tr B4YTT9 B4YTT9_9ACAR Heat shock protein 70-2 OS=Tetranychus cinnabarinus PE=   | <i>Tetranychus cinnabarinus</i> | 3 | 0.000 |
| tr A6N9Z0 A6N9Z0_ORNPR Ubiquitin/40S ribosomal protein S27a OS=Ornithodoros par  | <i>Ornithodoros parkeri</i>     | 3 | 0.000 |
| tr A6NA14 A6NA14_ORNPR Truncated peroxiredoxin (Fragment) OS=Ornithodoros parke  | <i>Ornithodoros parkeri</i>     | 3 | 0.000 |
| tr B7P3B9 B7P3B9_I_XOSC Lumican, putative OS=Ixodes scapularis GN=IscW_ISCW00102 | <i>Ixodes scapularis</i>        | 2 | 0.000 |
| tr B7P3M8 B7P3M8_I_XOSC D-3-phosphoglycerate dehydrogenase, putative (Fragment)  | <i>Ixodes scapularis</i>        | 2 | 0.000 |
| tr B7P427 B7P427_I_XOSC Transmembrane protein Tmp21, putative OS=Ixodes scapular | <i>Ixodes scapularis</i>        | 2 | 0.000 |
| tr B7P526 B7P526_I_XOSC Reductase, putative OS=Ixodes scapularis GN=IscW_ISCW00  | <i>Ixodes scapularis</i>        | 2 | 0.000 |
| tr B7P591 B7P591_I_XOSC Phosphoribosylamidoimidazole-succinocarboxamide synthas  | <i>Ixodes scapularis</i>        | 2 | 0.000 |

|                                                                                 |                                  |   |       |
|---------------------------------------------------------------------------------|----------------------------------|---|-------|
| tr B7P5U7 B7P5U7_IxOSC Lon protease homolog (Fragment) OS=Ixodes scapularis GN= | <i>Ixodes scapularis</i>         | 2 | 0.000 |
| tr B7PA04 B7PA04_IxOSC Putative uncharacterized protein OS=Ixodes scapularis GN | <i>Ixodes scapularis</i>         | 2 | 0.000 |
| tr B7PA24 B7PA24_IxOSC Protein phosphatase 2A regulatory subunit A, putative OS | <i>Ixodes scapularis</i>         | 2 | 0.000 |
| tr B7PBW3 B7PBW3_IxOSC Protein disulfide isomerase 1, putative OS=Ixodes scapul | <i>Ixodes scapularis</i>         | 2 | 0.000 |
| tr B7PCL8 B7PCL8_IxOSC Hydroxysteroid (17-beta) dehydrogenase, putative OS=Ixo  | <i>Ixodes scapularis</i>         | 2 | 0.000 |
| tr B7PEU9 B7PEU9_IxOSC Heat shock protein OS=Ixodes scapularis GN=IscW_ISCW0178 | <i>Ixodes scapularis</i>         | 2 | 0.000 |
| tr B7PEY5 B7PEY5_IxOSC Alanyl-tRNA synthetase, putative OS=Ixodes scapularis G  | <i>Ixodes scapularis</i>         | 2 | 0.000 |
| tr B7PGM6 B7PGM6_IxOSC G-3-P dehydrogenase, putative (Fragment) OS=Ixodes scapu | <i>Ixodes scapularis</i>         | 2 | 0.000 |
| tr B7PIZ1 B7PIZ1_IxOSC GDI-1 GDP dissociation inhibitor, putative (Fragment) OS | <i>Ixodes scapularis</i>         | 2 | 0.000 |
| tr B7PMY6 B7PMY6_IxOSC Actin depolymerizing factor, putative OS=Ixodes scapula  | <i>Ixodes scapularis</i>         | 2 | 0.000 |
| tr B7PTR3 B7PTR3_IxOSC Limbic system-associated membrane protein, putative OS=I | <i>Ixodes scapularis</i>         | 2 | 0.000 |
| tr B7PUK8 B7PUK8_IxOSC Clathrin heavy chain, putative (Fragment) OS=Ixodes scap | <i>Ixodes scapularis</i>         | 2 | 0.000 |
| tr B7PYE7 B7PYE7_IxOSC B-cell receptor-associated protein, putative OS=Ixodes s | <i>Ixodes scapularis</i>         | 2 | 0.000 |
| tr B7Q0D5 B7Q0D5_IxOSC Pyruvate kinase OS=Ixodes scapularis GN=IscW_ISCW020197  | <i>Ixodes scapularis</i>         | 2 | 0.000 |
| tr B7Q4P0 B7Q4P0_IxOSC Putative uncharacterized protein OS=Ixodes scapularis GN | <i>Ixodes scapularis</i>         | 2 | 0.000 |
| tr B7Q4T5 B7Q4T5_IxOSC Putative uncharacterized protein OS=Ixodes scapularis GN | <i>Ixodes scapularis</i>         | 2 | 0.000 |
| tr B7Q6Y2 B7Q6Y2_IxOSC Chaperonin subunit, putative OS=Ixodes scapularis GN=Is  | <i>Ixodes scapularis</i>         | 2 | 0.000 |
| tr B7Q8W6 B7Q8W6_IxOSC Alkyl hydroperoxide reductase, thiol specific antioxi    | <i>Ixodes scapularis</i>         | 2 | 0.000 |
| tr B7QAW3 B7QAW3_IxOSC Electron transfer flavoprotein, beta subunit, putative O | <i>Ixodes scapularis</i>         | 2 | 0.000 |
| tr B7QBM8 B7QBM8_IxOSC Enoyl-CoA hydratase, putative OS=Ixodes scapularis GN=Is | <i>Ixodes scapularis</i>         | 2 | 0.000 |
| tr B7QC74 B7QC74_IxOSC Transcription factor containing NAC and TS-N domains, pu | <i>Ixodes scapularis</i>         | 2 | 0.000 |
| tr B7QFN6 B7QFN6_IxOSC Proliferating cell nuclear antigen OS=Ixodes scapularis  | <i>Ixodes scapularis</i>         | 2 | 0.000 |
| tr B7QGQ3 B7QGQ3_IxOSC Putative uncharacterized protein OS=Ixodes scapularis GN | <i>Ixodes scapularis</i>         | 2 | 0.000 |
| tr B7QHT2 B7QHT2_IxOSC Profilin (Fragment) OS=Ixodes scapularis GN=IscW_ISCW023 | <i>Ixodes scapularis</i>         | 2 | 0.000 |
| tr B7QIJ3 B7QIJ3_IxOSC Quinone oxidoreductase, putative (Fragment) OS=Ixodes s  | <i>Ixodes scapularis</i>         | 2 | 0.000 |
| tr B7QL57 B7QL57_IxOSC Adenylyl cyclase-associated protein OS=Ixodes scapulari  | <i>Ixodes scapularis</i>         | 2 | 0.000 |
| tr B7QLY6 B7QLY6_IxOSC Nucleoside diphosphate kinase OS=Ixodes scapularis GN=Is | <i>Ixodes scapularis</i>         | 2 | 0.000 |
| tr B7QMD6 B7QMD6_IxOSC Transaldolase, putative OS=Ixodes scapularis GN=IscW_ISC | <i>Ixodes scapularis</i>         | 2 | 0.000 |
| tr Q64K73 Q64K73_9ACAR Calreticulin (Fragment) OS=Ixodes woodi PE=3 SV=1        | <i>Ixodes woodi</i>              | 2 | 0.000 |
| tr A5LHV9 A5LHV9_HAELO Protein disulfide isomerase-2 OS=Haemaphysalis longicorn | <i>Haemaphysalis longicornis</i> | 2 | 0.000 |
| tr A6N9S1 A6N9S1_ORNPR Thioredoxin peroxidase OS=Ornithodoros parkeri PE=2 SV=  | <i>Ornithodoros parkeri</i>      | 2 | 0.000 |
| tr A9Y1V1 A9Y1V1_HAELO Ribosomal protein P0 OS=Haemaphysalis longicornis PE=2 S | <i>Haemaphysalis</i>             | 2 | 0.000 |

|                                                                                 | longicornis                     |   |       |
|---------------------------------------------------------------------------------|---------------------------------|---|-------|
| tr A9XYV8 A9XYV8_MASGI Putative uncharacterized protein (Fragment) OS=Mastigopr | <i>Mastigoproctus giganteus</i> | 1 | 0.000 |
| tr B4YTU0 B4YTU0_9ACAR Heat shock protein 70-3 OS=Tetranychus cinnabarinus PE=  | <i>Tetranychus cinnabarinus</i> | 1 | 0.000 |
| sp Q4PLZ3 TCTP_IXOSC Translationally-controlled tumor protein homolog OS=Ixodes | <i>Ixodes scapularis</i>        | 1 | 0.000 |
| tr B7P1C8 B7P1C8_IXOSC Protein hu-li tai shao, putative OS=Ixodes scapularis GN | <i>Ixodes scapularis</i>        | 1 | 0.000 |
| tr B7P1U0 B7P1U0_IXOSC GTP-specific succinyl-CoA synthetase, beta subunit, put  | <i>Ixodes scapularis</i>        | 1 | 0.000 |
| tr B7P201 B7P201_IXOSC Ran GTPase-activating protein, putative OS=Ixodes scapul | <i>Ixodes scapularis</i>        | 1 | 0.000 |
| tr B7P2P8 B7P2P8_IXOSC ATP synthase alpha subunit vacuolar, putative (Fragment) | <i>Ixodes scapularis</i>        | 1 | 0.000 |
| tr B7P2Q4 B7P2Q4_IXOSC Lamin, putative OS=Ixodes scapularis GN=IscW_ISCW000339  | <i>Ixodes scapularis</i>        | 1 | 0.000 |
| tr B7P328 B7P328_IXOSC Superoxide dismutase (Fragment) OS=Ixodes scapularis GN  | <i>Ixodes scapularis</i>        | 1 | 0.000 |
| tr B7P361 B7P361_IXOSC 26S protease regulatory subunit 6B, putative OS=Ixodes s | <i>Ixodes scapularis</i>        | 1 | 0.000 |
| tr B7P363 B7P363_IXOSC Ufm1-conjugating enzyme, putative OS=Ixodes scapularis   | <i>Ixodes scapularis</i>        | 1 | 0.000 |
| tr B7P3A9 B7P3A9_IXOSC Coatomer delta subunit, putative OS=Ixodes scapularis GN | <i>Ixodes scapularis</i>        | 1 | 0.000 |
| tr B7P3G6 B7P3G6_IXOSC Medium-chain acyl-CoA dehydrogenase, putative OS=Ixodes  | <i>Ixodes scapularis</i>        | 1 | 0.000 |
| tr B7P3N4 B7P3N4_IXOSC Cytochrome P450, putative OS=Ixodes scapularis GN=IscW_I | <i>Ixodes scapularis</i>        | 1 | 0.000 |
| tr B7P462 B7P462_IXOSC Putative uncharacterized protein (Fragment) OS=Ixodes sc | <i>Ixodes scapularis</i>        | 1 | 0.000 |
| tr B7P4M6 B7P4M6_IXOSC Tyrosyl-tRNA synthetase, putative OS=Ixodes scapularis   | <i>Ixodes scapularis</i>        | 1 | 0.000 |
| tr B7P557 B7P557_IXOSC Mapmodulin, putative OS=Ixodes scapularis GN=IscW_ISCW00 | <i>Ixodes scapularis</i>        | 1 | 0.000 |
| tr B7P5C4 B7P5C4_IXOSC Translation initiation factor 4F, helicase subunit, puta | <i>Ixodes scapularis</i>        | 1 | 0.000 |
| tr B7P6A9 B7P6A9_IXOSC ATP synthase subunit beta OS=Ixodes scapularis GN=IscW_I | <i>Ixodes scapularis</i>        | 1 | 0.000 |
| tr B7P6P0 B7P6P0_IXOSC Glycoprotein 25I, putative OS=Ixodes scapularis GN=IscW_ | <i>Ixodes scapularis</i>        | 1 | 0.000 |
| tr B7P7P7 B7P7P7_IXOSC Apoptosis inhibitor, putative OS=Ixodes scapularis GN=I  | <i>Ixodes scapularis</i>        | 1 | 0.000 |
| tr B7P7U3 B7P7U3_IXOSC Chloride channel, putative OS=Ixodes scapularis GN=IscW  | <i>Ixodes scapularis</i>        | 1 | 0.000 |
| tr B7P839 B7P839_IXOSC DEK domain-containing protein, putative OS=Ixodes scapu  | <i>Ixodes scapularis</i>        | 1 | 0.000 |
| tr B7P9E4 B7P9E4_IXOSC Na+/K+ ATPase, alpha subunit, putative (Fragment) OS=Ixo | <i>Ixodes scapularis</i>        | 1 | 0.000 |
| tr B7PB95 B7PB95_IXOSC Stathmin OS=Ixodes scapularis GN=IscW_ISCW003366 PE=3 S  | <i>Ixodes scapularis</i>        | 1 | 0.000 |
| tr B7PBJ3 B7PBJ3_IXOSC Putative uncharacterized protein (Fragment) OS=Ixodes sc | <i>Ixodes scapularis</i>        | 1 | 0.000 |
| tr B7PDF5 B7PDF5_IXOSC Prolyl endopeptidase, putative OS=Ixodes scapularis GN=I | <i>Ixodes scapularis</i>        | 1 | 0.000 |
| tr B7PEA9 B7PEA9_IXOSC 40S ribosomal protein, putative OS=Ixodes scapularis GN= | <i>Ixodes scapularis</i>        | 1 | 0.000 |
| tr B7PEL0 B7PEL0_IXOSC Tetraspanin, putative OS=Ixodes scapularis GN=IscW_ISCW0 | <i>Ixodes scapularis</i>        | 1 | 0.000 |
| tr B7PH43 B7PH43_IXOSC Alpha tubulin OS=Ixodes scapularis GN=IscW_ISCW003527 PE | <i>Ixodes scapularis</i>        | 1 | 0.000 |
| tr B7PHG9 B7PHG9_IXOSC ATPase, putative OS=Ixodes scapularis GN=IscW_ISCW01829  | <i>Ixodes scapularis</i>        | 1 | 0.000 |

|                                                                                  |                          |   |       |
|----------------------------------------------------------------------------------|--------------------------|---|-------|
| tr B7PHT2 B7PHT2_I_XOSC Histone H2A OS=Ixodes scapularis GN=IscW_ISCW004478 PE=  | <i>Ixodes scapularis</i> | 1 | 0.000 |
| tr B7PIN1 B7PIN1_I_XOSC Heat shock protein 20.6, putative OS=Ixodes scapularis G | <i>Ixodes scapularis</i> | 1 | 0.000 |
| tr B7PJ70 B7PJ70_I_XOSC Reticulon/nogo, putative OS=Ixodes scapularis GN=IscW_IS | <i>Ixodes scapularis</i> | 1 | 0.000 |
| tr B7PKH2 B7PKH2_I_XOSC Mcm2/3, putative (Fragment) OS=Ixodes scapularis GN=Isc  | <i>Ixodes scapularis</i> | 1 | 0.000 |
| tr B7PKL1 B7PKL1_I_XOSC Neurofilament medium polypeptide, putative (Fragment) OS | <i>Ixodes scapularis</i> | 1 | 0.000 |
| tr B7PKP8 B7PKP8_I_XOSC Spermidine synthase, putative OS=Ixodes scapularis GN=I  | <i>Ixodes scapularis</i> | 1 | 0.000 |
| tr B7PL04 B7PL04_I_XOSC Pyruvate decarboxylase (E-1) alpha subunit, putative (Fr | <i>Ixodes scapularis</i> | 1 | 0.000 |
| tr B7PL25 B7PL25_I_XOSC Double-stranded RNA-specific editase B2, putative OS=Ix  | <i>Ixodes scapularis</i> | 1 | 0.000 |
| tr B7PMC3 B7PMC3_I_XOSC Putative uncharacterized protein OS=Ixodes scapularis GN | <i>Ixodes scapularis</i> | 1 | 0.000 |
| tr B7PNG4 B7PNG4_I_XOSC Alpha tubulin, putative OS=Ixodes scapularis GN=IscW_ISC | <i>Ixodes scapularis</i> | 1 | 0.000 |
| tr B7PNN1 B7PNN1_I_XOSC Proteasome subunit alpha type OS=Ixodes scapularis GN=Is | <i>Ixodes scapularis</i> | 1 | 0.000 |
| tr B7PPI3 B7PPI3_I_XOSC Secreted protein, putative OS=Ixodes scapularis GN=IscW_ | <i>Ixodes scapularis</i> | 1 | 0.000 |
| tr B7PPL3 B7PPL3_I_XOSC Microtubule-binding protein, putative OS=Ixodes scapular | <i>Ixodes scapularis</i> | 1 | 0.000 |
| tr B7PQP7 B7PQP7_I_XOSC Hydroxyacyl-CoA dehydrogenase, putative (Fragment) OS=Ix | <i>Ixodes scapularis</i> | 1 | 0.000 |
| tr B7PR83 B7PR83_I_XOSC Ubiquitin conjugating enzyme E1, putative OS=Ixodes scap | <i>Ixodes scapularis</i> | 1 | 0.000 |
| tr B7PT52 B7PT52_I_XOSC Embryonic protein DC-8, putative OS=Ixodes scapularis GN | <i>Ixodes scapularis</i> | 1 | 0.000 |
| tr B7PVG5 B7PVG5_I_XOSC GTP-binding protein, putative OS=Ixodes scapularis GN=Is | <i>Ixodes scapularis</i> | 1 | 0.000 |
| tr B7PVL8 B7PVL8_I_XOSC Guanine nucleotide-binding protein G, putative (Fragment | <i>Ixodes scapularis</i> | 1 | 0.000 |
| tr B7PWM5 B7PWM5_I_XOSC Alternative splicing factor SRp20/9G8, putative OS=Ixode | <i>Ixodes scapularis</i> | 1 | 0.000 |
| tr B7PWY6 B7PWY6_I_XOSC Ubiquitin carboxyl-terminal hydrolase OS=Ixodes scapular | <i>Ixodes scapularis</i> | 1 | 0.000 |
| tr B7PZ24 B7PZ24_I_XOSC Chaperonin complex component, TCP-1 delta subunit, putat | <i>Ixodes scapularis</i> | 1 | 0.000 |
| tr B7PZR4 B7PZR4_I_XOSC Surfeit 4 protein, putative OS=Ixodes scapularis GN=IscW | <i>Ixodes scapularis</i> | 1 | 0.000 |
| tr B7Q0D6 B7Q0D6_I_XOSC Phosphoserine aminotransferase, putative OS=Ixodes scapu | <i>Ixodes scapularis</i> | 1 | 0.000 |
| tr B7Q121 B7Q121_I_XOSC Putative uncharacterized protein OS=Ixodes scapularis GN | <i>Ixodes scapularis</i> | 1 | 0.000 |
| tr B7Q1V4 B7Q1V4_I_XOSC Galectin, putative OS=Ixodes scapularis GN=IscW_ISCW008  | <i>Ixodes scapularis</i> | 1 | 0.000 |
| tr B7Q2W2 B7Q2W2_I_XOSC UTP-glucose-1-phosphate uridylyltransferase, putative (F | <i>Ixodes scapularis</i> | 1 | 0.000 |
| tr B7Q3I2 B7Q3I2_I_XOSC Citrate synthase (Fragment) OS=Ixodes scapularis GN=IscW | <i>Ixodes scapularis</i> | 1 | 0.000 |
| tr B7Q5F6 B7Q5F6_I_XOSC Proteasome subunit alpha type OS=Ixodes scapularis GN=Is | <i>Ixodes scapularis</i> | 1 | 0.000 |
| tr B7Q645 B7Q645_I_XOSC Secreted salivary gland peptide, putative (Fragment) OS  | <i>Ixodes scapularis</i> | 1 | 0.000 |
| tr B7Q6Z1 B7Q6Z1_I_XOSC Saposin, putative OS=Ixodes scapularis GN=IscW_ISCW01159 | <i>Ixodes scapularis</i> | 1 | 0.000 |
| tr B7Q8U6 B7Q8U6_I_XOSC Adenosine kinase, putative OS=Ixodes scapularis GN=IscW_ | <i>Ixodes scapularis</i> | 1 | 0.000 |
| tr B7QAP3 B7QAP3_I_XOSC Dihydropteridine reductase, putative OS=Ixodes scapulari | <i>Ixodes scapularis</i> | 1 | 0.000 |

|                                                                                              |                                  |   |       |
|----------------------------------------------------------------------------------------------|----------------------------------|---|-------|
| tr B7QDB1 B7QDB1_IXOSC Ubiquitin carboxyl-terminal hydrolase (Fragment) OS=Ixodes scapularis | <i>Ixodes scapularis</i>         | 1 | 0.000 |
| tr B7QDV1 B7QDV1_IXOSC Histone, putative OS=Ixodes scapularis GN=IscW_ISCW01223              | <i>Ixodes scapularis</i>         | 1 | 0.000 |
| tr B7QE67 B7QE67_IXOSC Proteasome subunit alpha type OS=Ixodes scapularis GN=Is              | <i>Ixodes scapularis</i>         | 1 | 0.000 |
| tr B7QF40 B7QF40_IXOSC Proteasome, subunit beta, putative OS=Ixodes scapularis               | <i>Ixodes scapularis</i>         | 1 | 0.000 |
| tr B7QFX7 B7QFX7_IXOSC RAB-9 and, putative OS=Ixodes scapularis GN=IscW_ISCW021              | <i>Ixodes scapularis</i>         | 1 | 0.000 |
| tr B7QHA1 B7QHA1_IXOSC Ubiquitin carboxyl-terminal hydrolase isozyme L3, putat               | <i>Ixodes scapularis</i>         | 1 | 0.000 |
| tr B7QJ52 B7QJ52_IXOSC Transcriptional regulator DJ-1, putative OS=Ixodes scap               | <i>Ixodes scapularis</i>         | 1 | 0.000 |
| tr B7QJH6 B7QJH6_IXOSC Alpha-actinin, putative OS=Ixodes scapularis GN=IscW_ISC              | <i>Ixodes scapularis</i>         | 1 | 0.000 |
| tr B7QLE3 B7QLE3_IXOSC Protein kinase C substrate, 80 KD protein, heavy chain,               | <i>Ixodes scapularis</i>         | 1 | 0.000 |
| tr B7QNN4 B7QNN4_IXOSC Protein arginine N-methyltransferase PRMT1, putative OS=              | <i>Ixodes scapularis</i>         | 1 | 0.000 |
| tr Q4PM51 Q4PM51_IXOSC Translation initiation factor 5A (Fragment) OS=Ixodes sc              | <i>Ixodes scapularis</i>         | 1 | 0.000 |
| tr Q4VRW1 Q4VRW1_IXOSC Nucleotidase 4F8 OS=Ixodes scapularis PE=2 SV=1                       | <i>Ixodes scapularis</i>         | 1 | 0.000 |
| tr A6N9P0 A6N9P0_ORNPR 40S ribosomal protein S14 OS=Ornithodoros parkeri PE=2 S              | <i>Ornithodoros parkeri</i>      | 1 | 0.000 |
| tr B0LA19 B0LA19_9ACAR Glutathione S-transferase mu class OS=Rhipicephalus annu              | <i>Rhipicephalus annulatus</i>   | 1 | 0.000 |
| tr B2D2D4 B2D2D4_9ACAR Translation elongation factor EF-1 alpha/Tu (Fragment)                | <i>Ornithodoros coriaceus</i>    | 1 | 0.000 |
| tr B5M792 B5M792_9ACAR Heterogeneous nuclear ribonucleoprotein (Fragment) OS=Am              | <i>Amblyomma americanum</i>      | 1 | 0.000 |
| tr Q6X4W3 Q6X4W3_HAELO Actin OS=Haemaphysalis longicornis GN=Act1 PE=2 SV=1                  | <i>Haemaphysalis longicornis</i> | 1 | 0.000 |
| tr Q86G66 Q86G66_DERVA Putative beta thymosin OS=Dermacentor variabilis PE=2 SV              | <i>Dermacentor variabilis</i>    | 1 | 0.000 |
| tr B7PC41 B7PC41_IXOSC Scavenger receptor class B type I, putative OS=Ixodes s               | <i>Ixodes scapularis</i>         | 1 | 0.002 |
| tr B7Q9Z3 B7Q9Z3_IXOSC Proteasome subunit alpha type (Fragment) OS=Ixodes scapu              | <i>Ixodes scapularis</i>         | 1 | 0.002 |
| tr B7Q634 B7Q634_IXOSC Cap binding protein, putative OS=Ixodes scapularis GN=I               | <i>Ixodes scapularis</i>         | 1 | 0.002 |
| tr B7PVI7 B7PVI7_IXOSC RNA-binding protein musashi, putative OS=Ixodes scapula               | <i>Ixodes scapularis</i>         | 3 | 0.002 |
| tr B7P625 B7P625_IXOSC Prohibitin, putative OS=Ixodes scapularis GN=IscW_ISCW00              | <i>Ixodes scapularis</i>         | 2 | 0.002 |
| tr B7P950 B7P950_IXOSC DNA-binding protein, putative OS=Ixodes scapularis GN=I               | <i>Ixodes scapularis</i>         | 2 | 0.002 |
| tr B7QMM1 B7QMM1_IXOSC Glycine C-acetyltransferase/2-amino-3-ketobutyrate-CoA I              | <i>Ixodes scapularis</i>         | 1 | 0.002 |
| tr B7QIG3 B7QIG3_IXOSC Electron transfer flavoprotein, alpha subunit, putative               | <i>Ixodes scapularis</i>         | 4 | 0.002 |
| tr B4YTT8 B4YTT8_9ACAR Heat shock protein 70-1 OS=Tetranychus cinnabarinus PE=2              | <i>Tetranychus cinnabarinus</i>  | 3 | 0.002 |
| tr Q4PM16 Q4PM16_IXOSC 60S ribosomal protein L23 OS=Ixodes scapularis PE=2 SV=               | <i>Ixodes scapularis</i>         | 1 | 0.002 |
| tr B7Q505 B7Q505_IXOSC Elongation factor Tu OS=Ixodes scapularis GN=IscW_ISCW0               | <i>Ixodes scapularis</i>         | 3 | 0.002 |
| tr A6NA07 A6NA07_ORNPR 60S ribosomal protein L9 OS=Ornithodoros parkeri PE=2 S               | <i>Ornithodoros parkeri</i>      | 1 | 0.002 |
| tr B7QH63 B7QH63_IXOSC Putative uncharacterized protein OS=Ixodes scapularis G               | <i>Ixodes scapularis</i>         | 1 | 0.002 |
| tr B7QIL1 B7QIL1_IXOSC FERM, RhoGEF and pleckstrin domain-containing protein,                | <i>Ixodes scapularis</i>         | 1 | 0.002 |

|                                                                                  |                                  |   |       |
|----------------------------------------------------------------------------------|----------------------------------|---|-------|
| tr B7Q0K8 B7Q0K8_IXOSC Ribosome biogenesis protein-Nop58p/Nop5p, putative OS=I   | <i>Ixodes scapularis</i>         | 2 | 0.002 |
| tr B7PJP9 B7PJP9_IXOSC Enolase OS=Ixodes scapularis GN=IscW_ISCW017666 PE=3 SV=  | <i>Ixodes scapularis</i>         | 1 | 0.002 |
| tr A7BF19 A7BF19_HAELO Valosin containing protein OS=Haemaphysalis longicornis   | <i>Haemaphysalis longicornis</i> | 3 | 0.002 |
| tr B7P0P1 B7P0P1_IXOSC DNA topoisomerase 2 OS=Ixodes scapularis GN=IscW_ISCW01   | <i>Ixodes scapularis</i>         | 2 | 0.002 |
| tr B7QGH7 B7QGH7_IXOSC Ataxin-10, putative OS=Ixodes scapularis GN=IscW_ISCW022  | <i>Ixodes scapularis</i>         | 1 | 0.002 |
| tr B7Q0R0 B7Q0R0_IXOSC Phosphoglycerate mutase, putative OS=Ixodes scapularis G  | <i>Ixodes scapularis</i>         | 1 | 0.002 |
| tr B7PZP2 B7PZP2_IXOSC Putative uncharacterized protein (Fragment) OS=Ixodes s   | <i>Ixodes scapularis</i>         | 2 | 0.002 |
| tr B7PXC2 B7PXC2_IXOSC Glycoprotein gC1qBP, putative OS=Ixodes scapularis GN=I   | <i>Ixodes scapularis</i>         | 1 | 0.002 |
| tr B7QF39 B7QF39_IXOSC Transcription factor Mbf1, putative OS=Ixodes scapulari   | <i>Ixodes scapularis</i>         | 2 | 0.002 |
| tr B7Q5K4 B7Q5K4_IXOSC Radixin, moesin, putative OS=Ixodes scapularis GN=IscW_   | <i>Ixodes scapularis</i>         | 1 | 0.002 |
| tr B7P7A5 B7P7A5_IXOSC Ribophorin, putative (Fragment) OS=Ixodes scapularis GN=  | <i>Ixodes scapularis</i>         | 3 | 0.002 |
| tr A1DZP1 A1DZP1_9ACAR Elongation factor 1 alpha (Fragment) OS=Rhysotritia dupli | <i>Rhysotritia duplicata</i>     | 1 | 0.002 |
| tr B7Q6G7 B7Q6G7_IXOSC Flavonol reductase/cinnamoyl-CoA reductase, putative (F   | <i>Ixodes scapularis</i>         | 3 | 0.002 |
| tr B7PSK1 B7PSK1_IXOSC Vacuolar sorting protein VPS28, putative OS=Ixodes scapu  | <i>Ixodes scapularis</i>         | 1 | 0.002 |
| tr B7PDE1 B7PDE1_IXOSC 26S proteasome non-ATPase regulatory subunit, putative    | <i>Ixodes scapularis</i>         | 1 | 0.002 |
| tr A0SHR2 A0SHR2_AMBVA Protein disulfide isomerase OS=Amblyomma variegatum PE=2  | <i>Amblyomma variegatum</i>      | 3 | 0.002 |
| tr B7PJY6 B7PJY6_IXOSC Flavonol reductase/cinnamoyl-CoA reductase, putative OS=  | <i>Ixodes scapularis</i>         | 2 | 0.003 |
| tr B7Q6N4 B7Q6N4_IXOSC Proteasome subunit alpha type, putative OS=Ixodes scapul  | <i>Ixodes scapularis</i>         | 2 | 0.003 |
| tr B7Q2P8 B7Q2P8_IXOSC 16 kDa thioredoxin, putative OS=Ixodes scapularis GN=I    | <i>Ixodes scapularis</i>         | 3 | 0.003 |
| tr B7Q0Q1 B7Q0Q1_IXOSC Putative uncharacterized protein (Fragment) OS=Ixodes sc  | <i>Ixodes scapularis</i>         | 1 | 0.003 |
| tr Q4PLZ7 Q4PLZ7_IXOSC Signal peptidase, putative OS=Ixodes scapularis GN=IscW   | <i>Ixodes scapularis</i>         | 1 | 0.003 |
| tr B7PCD2 B7PCD2_IXOSC NADP-dependent isocitrate dehydrogenase, putative OS=Ixo  | <i>Ixodes scapularis</i>         | 1 | 0.003 |
| tr B7P585 B7P585_IXOSC Phosphoglycerate kinase OS=Ixodes scapularis GN=IscW_ISC  | <i>Ixodes scapularis</i>         | 2 | 0.003 |
| tr B7P595 B7P595_IXOSC Proline and glutamine-rich splicing factor (SFPQ), puta   | <i>Ixodes scapularis</i>         | 2 | 0.003 |
| tr B7PE36 B7PE36_IXOSC Nucleosome assembly protein NAP-1, putative (Fragment)    | <i>Ixodes scapularis</i>         | 1 | 0.003 |
| tr B7QN17 B7QN17_IXOSC Thioredoxin-dependent peroxide reductase OS=Ixodes scapu  | <i>Ixodes scapularis</i>         | 2 | 0.003 |
| tr B7Q1W5 B7Q1W5_IXOSC Elongation factor 1 gamma, putative OS=Ixodes scapulari   | <i>Ixodes scapularis</i>         | 1 | 0.003 |
| tr A6N9Z4 A6N9Z4_ORNPR 40S ribosomal protein S3 OS=Ornithodoros parkeri PE=2 SV  | <i>Ornithodoros parkeri</i>      | 2 | 0.003 |
| tr A8UY20 A8UY20_9ACAR Elongation factor 1-alpha (Fragment) OS=Hypochthonius I   | <i>Hypochthonius luteus</i>      | 2 | 0.003 |
| tr B7QAW9 B7QAW9_IXOSC ATP synthase B chain, putative OS=Ixodes scapularis GN=   | <i>Ixodes scapularis</i>         | 1 | 0.003 |
| tr B7PUS2 B7PUS2_IXOSC Ribosome recycling factor, putative OS=Ixodes scapulari   | <i>Ixodes scapularis</i>         | 1 | 0.003 |
| tr A9QQC2 A9QQC2_LYCSI Cofilin OS=Lycosa singoriensis PE=2 SV=1                  | <i>Lycosa singoriensis</i>       | 1 | 0.003 |

|                                                                                 |                                  |   |       |
|---------------------------------------------------------------------------------|----------------------------------|---|-------|
| tr B7PEL3 B7PEL3_IXOSC Protein tyrosine phosphatase, putative OS=Ixodes scapula | <i>Ixodes scapularis</i>         | 1 | 0.003 |
| tr B7P2S4 B7P2S4_IXOSC Acetyl-CoA acetyltransferase, putative (Fragment) OS=Ix  | <i>Ixodes scapularis</i>         | 1 | 0.003 |
| tr B7PR84 B7PR84_IXOSC Ubiquitin-activating enzyme E1, putative (Fragment) OS=  | <i>Ixodes scapularis</i>         | 4 | 0.003 |
| tr B7QIX6 B7QIX6_IXOSC Kinesin, putative OS=Ixodes scapularis GN=IscW_ISCW01433 | <i>Ixodes scapularis</i>         | 1 | 0.003 |
| tr B7PC82 B7PC82_IXOSC Thimet oligopeptidase, putative OS=Ixodes scapularis GN  | <i>Ixodes scapularis</i>         | 1 | 0.003 |
| tr B7QI53 B7QI53_IXOSC Apoptosis-promoting RNA-binding protein TIA-1/TIAR, put  | <i>Ixodes scapularis</i>         | 3 | 0.003 |
| tr B2ZWT4 B2ZWT4_HAELO Peptidyl-prolyl cis-trans isomerase OS=Haemaphysalis lo  | <i>Haemaphysalis longicornis</i> | 1 | 0.003 |
| sp Q09JT4 RL38_ARGMO 60S ribosomal protein L38 OS=Argas monolakensis GN=RpL38   | <i>Argas monolakensis</i>        | 1 | 0.003 |
| tr B7QDB3 B7QDB3_IXOSC Ribosomal protein S27 OS=Ixodes scapularis GN=IscW_ISCW  | <i>Ixodes scapularis</i>         | 1 | 0.003 |
| tr B7PS62 B7PS62_IXOSC 26S proteasome regulatory complex, subunit RPN10/PSMD4,  | <i>Ixodes scapularis</i>         | 1 | 0.003 |
| tr B7P2W2 B7P2W2_IXOSC 60S ribosomal protein L14, putative OS=Ixodes scapularis | <i>Ixodes scapularis</i>         | 1 | 0.003 |
| tr B7QIP4 B7QIP4_IXOSC 4Snc-Tudor domain protein, putative OS=Ixodes scapularis | <i>Ixodes scapularis</i>         | 3 | 0.003 |
| tr Q4PLY7 Q4PLY7_IXOSC Nucleoside diphosphate kinase (Fragment) OS=Ixodes scapu | <i>Ixodes scapularis</i>         | 2 | 0.003 |
| tr B7P289 B7P289_IXOSC Prolyl 4-hydroxylase alpha subunit, putative OS=Ixodes s | <i>Ixodes scapularis</i>         | 1 | 0.003 |
| sp A6NA00 RSSA_ORNPR 40S ribosomal protein SA OS=Ornithodoros parkeri PE=2 SV=  | <i>Ornithodoros parkeri</i>      | 2 | 0.003 |
| tr B7PQS1 B7PQS1_IXOSC Phenylalanyl-tRNA synthetase beta subunit, putative OS=  | <i>Ixodes scapularis</i>         | 1 | 0.003 |
| tr B7PGC4 B7PGC4_IXOSC Uridine 5'-monophosphate synthase, putative OS=Ixodes sc | <i>Ixodes scapularis</i>         | 1 | 0.003 |
| tr B7PEK1 B7PEK1_IXOSC Polypyrimidine tract binding protein, putative (Fragmen  | <i>Ixodes scapularis</i>         | 1 | 0.003 |
| tr B7Q1Y2 B7Q1Y2_IXOSC 6-phosphogluconate dehydrogenase, decarboxylating (Frag  | <i>Ixodes scapularis</i>         | 2 | 0.003 |
| tr Q64K74 Q64K74_IXOSC Calreticulin OS=Ixodes scapularis PE=3 SV=1              | <i>Ixodes scapularis</i>         | 1 | 0.003 |
| tr B7PA03 B7PA03_IXOSC ATP-dependent helicase (DEAD box), putative OS=Ixodes s  | <i>Ixodes scapularis</i>         | 1 | 0.003 |
| tr B7PD56 B7PD56_IXOSC Peptidyl-prolyl cis-trans isomerase OS=Ixodes scapularis | <i>Ixodes scapularis</i>         | 3 | 0.003 |
| tr B7PZG8 B7PZG8_IXOSC Aldehyde dehydrogenase, putative OS=Ixodes scapularis GN | <i>Ixodes scapularis</i>         | 2 | 0.003 |
| tr A6N9N9 A6N9N9_ORNPR Ribosomal protein S7 OS=Ornithodoros parkeri PE=2 SV=1   | <i>Ornithodoros parkeri</i>      | 1 | 0.003 |
| tr B7PGX4 B7PGX4_IXOSC Synaptic vesicle-associated integral membrane protein,   | <i>Ixodes scapularis</i>         | 1 | 0.004 |
| tr B7Q331 B7Q331_IXOSC Glucose-6-phosphate 1-dehydrogenase (Fragment) OS=Ixode  | <i>Ixodes scapularis</i>         | 1 | 0.004 |
| tr B7P5W3 B7P5W3_IXOSC Acyl-CoA synthetase, putative OS=Ixodes scapularis GN=I  | <i>Ixodes scapularis</i>         | 1 | 0.004 |
| tr B7PQP6 B7PQP6_IXOSC Acetyl-CoA acetyltransferase, putative (Fragment) OS=Ix  | <i>Ixodes scapularis</i>         | 1 | 0.004 |
| tr B7PTQ4 B7PTQ4_IXOSC ADP ribosylation factor 79F, putative OS=Ixodes scapular | <i>Ixodes scapularis</i>         | 1 | 0.004 |
| tr B7Q5H9 B7Q5H9_IXOSC Fructose-bisphosphate aldolase OS=Ixodes scapularis GN=I | <i>Ixodes scapularis</i>         | 2 | 0.004 |
| tr B5M728 B5M728_9ACAR Translocon-associated protein subunit alpha OS=Amblyomma | <i>Amblyomma americanum</i>      | 1 | 0.004 |
| tr B7PSQ6 B7PSQ6_IXOSC 40S ribosomal protein S3A, putative OS=Ixodes scapularis | <i>Ixodes scapularis</i>         | 1 | 0.004 |

|                                                                                 |                                  |   |       |
|---------------------------------------------------------------------------------|----------------------------------|---|-------|
| tr B7Q396 B7Q396_IXOSC Secreted protein, putative OS=Ixodes scapularis GN=IscW  | <i>Ixodes scapularis</i>         | 1 | 0.004 |
| tr B7Q4L8 B7Q4L8_IXOSC Ribosomal protein, putative (Fragment) OS=Ixodes scapul  | <i>Ixodes scapularis</i>         | 1 | 0.004 |
| tr B7QCB3 B7QCB3_IXOSC Cytochrome B5, putative OS=Ixodes scapularis GN=IscW_IS  | <i>Ixodes scapularis</i>         | 1 | 0.004 |
| tr B7Q2P2 B7Q2P2_IXOSC Zinc finger protein, putative (Fragment) OS=Ixodes scapu | <i>Ixodes scapularis</i>         | 1 | 0.004 |
| tr B7P2T4 B7P2T4_IXOSC Ribosomal protein S17, putative OS=Ixodes scapularis GN  | <i>Ixodes scapularis</i>         | 1 | 0.004 |
| tr B7Q9E5 B7Q9E5_IXOSC Alpha-2-macroglobulin receptor-associated protein, puta  | <i>Ixodes scapularis</i>         | 1 | 0.004 |
| tr B7P5B3 B7P5B3_IXOSC U5 snRNP-specific protein, putative (Fragment) OS=Ixode  | <i>Ixodes scapularis</i>         | 1 | 0.004 |
| tr B7PJP4 B7PJP4_IXOSC Dolichyl-di-phosphooligosaccharide protein glycotransfe  | <i>Ixodes scapularis</i>         | 1 | 0.004 |
| tr B7P7F7 B7P7F7_IXOSC Heat shock protein, putative OS=Ixodes scapularis GN=Isc | <i>Ixodes scapularis</i>         | 1 | 0.004 |
| tr B7Q0B3 B7Q0B3_IXOSC Heat shock protein 70 (HSP70)-interacting protein, puta  | <i>Ixodes scapularis</i>         | 1 | 0.004 |
| tr B7PNL5 B7PNL5_IXOSC Syntenin, putative OS=Ixodes scapularis GN=IscW_ISCW0057 | <i>Ixodes scapularis</i>         | 1 | 0.004 |
| tr B7P5Y0 B7P5Y0_IXOSC Seryl-tRNA synthetase, putative OS=Ixodes scapularis GN  | <i>Ixodes scapularis</i>         | 1 | 0.004 |
| tr B7PXR5 B7PXR5_IXOSC Chaperonin complex component, TCP-1 eta subunit, putativ | <i>Ixodes scapularis</i>         | 1 | 0.004 |
| tr B7PPR5 B7PPR5_IXOSC Putative uncharacterized protein (Fragment) OS=Ixodes sc | <i>Ixodes scapularis</i>         | 1 | 0.004 |
| tr B7PCN1 B7PCN1_IXOSC Aldo-keto reductase, putative OS=Ixodes scapularis GN=Is | <i>Ixodes scapularis</i>         | 2 | 0.004 |
| tr B6V3B5 B6V3B5_IXORI Glutathione peroxidase OS=Ixodes ricinus PE=2 SV=1       | <i>Ixodes ricinus</i>            | 2 | 0.004 |
| tr B7QNR8 B7QNR8_IXOSC Importin beta, nuclear transport factor, putative OS=Ix  | <i>Ixodes scapularis</i>         | 2 | 0.004 |
| tr B7P573 B7P573_IXOSC Processing peptidase beta subunit, putative OS=Ixodes sc | <i>Ixodes scapularis</i>         | 3 | 0.006 |
| tr B7P7M2 B7P7M2_IXOSC Signal recognition particle protein, putative OS=Ixodes  | <i>Ixodes scapularis</i>         | 2 | 0.006 |
| tr B7PNN7 B7PNN7_IXOSC Attractin and platelet-activating factor acetylhydrolase | <i>Ixodes scapularis</i>         | 1 | 0.006 |
| tr B7Q4F2 B7Q4F2_IXOSC Cop9 complex subunit 7A, putative OS=Ixodes scapularis   | <i>Ixodes scapularis</i>         | 1 | 0.008 |
| tr B7PAS1 B7PAS1_IXOSC MCM2 protein, putative (Fragment) OS=Ixodes scapularis   | <i>Ixodes scapularis</i>         | 1 | 0.008 |
| tr B7PCK4 B7PCK4_IXOSC Splicing factor u2af large subunit, putative OS=Ixodes   | <i>Ixodes scapularis</i>         | 1 | 0.008 |
| tr B7QEF1 B7QEF1_IXOSC VAMP-associated protein involved in inositol metabolism  | <i>Ixodes scapularis</i>         | 1 | 0.008 |
| tr B7Q5L0 B7Q5L0_IXOSC ATP synthase OS=Ixodes scapularis GN=IscW_ISCW021200 PE  | <i>Ixodes scapularis</i>         | 1 | 0.008 |
| tr B7PQA7 B7PQA7_IXOSC Secreted protein, putative OS=Ixodes scapularis GN=IscW  | <i>Ixodes scapularis</i>         | 1 | 0.008 |
| tr A8UYT9 A8UYT9_9ACAR Elongation factor 1-alpha (Fragment) OS=Schoutedenocopt  | <i>Schoutedenocoptes aquilae</i> | 1 | 0.008 |
| tr A8UY35 A8UY35_9ACAR Elongation factor 1-alpha (Fragment) OS=Hormosianoetus m | <i>Hormosianoetus mallotae</i>   | 1 | 0.008 |
| tr B7PN29 B7PN29_IXOSC Steroid membrane receptor Hpr6.6/25-Dx, putative OS=Ixo  | <i>Ixodes scapularis</i>         | 2 | 0.008 |
| tr B7QAM9 B7QAM9_IXOSC Putative uncharacterized protein (Fragment) OS=Ixodes s  | <i>Ixodes scapularis</i>         | 1 | 0.008 |
| tr B7PQ08 B7PQ08_IXOSC U1 small nuclear ribonucleoprotein A, putative OS=Ixode  | <i>Ixodes scapularis</i>         | 1 | 0.008 |
| tr A9QQ29 A9QQ29_LYCSI Translation elongation factor 2 (Fragment) OS=Lycosa sin | <i>Lycosa singoriensis</i>       | 1 | 0.008 |

|                                                                                 |                                   |   |       |
|---------------------------------------------------------------------------------|-----------------------------------|---|-------|
| tr B7PYP5 B7PYP5_IxOSC Heat shock protein, putative OS=Ixodes scapularis GN=Is  | <i>Ixodes scapularis</i>          | 1 | 0.008 |
| tr B7Q3T6 B7Q3T6_IxOSC THO complex subunit, putative OS=Ixodes scapularis GN=Is | <i>Ixodes scapularis</i>          | 1 | 0.009 |
| tr B7QC21 B7QC21_IxOSC Annexin V, putative (Fragment) OS=Ixodes scapularis GN=  | <i>Ixodes scapularis</i>          | 2 | 0.009 |
| tr B7PSB7 B7PSB7_IxOSC Activator of 90 kDa heat shock protein ATPase, putative  | <i>Ixodes scapularis</i>          | 1 | 0.010 |
| tr B7QLI8 B7QLI8_IxOSC Tyrosine aminotransferase, putative (Fragment) OS=Ixodes | <i>Ixodes scapularis</i>          | 1 | 0.010 |
| tr Q4PM83 Q4PM83_IxOSC Ribosomal protein L27A, putative OS=Ixodes scapularis G  | <i>Ixodes scapularis</i>          | 1 | 0.010 |
| tr B7PV22 B7PV22_IxOSC Poly [ADP-ribose] polymerase, putative OS=Ixodes scapul  | <i>Ixodes scapularis</i>          | 1 | 0.010 |
| tr B7PHM9 B7PHM9_IxOSC Isocitrate dehydrogenase, putative (Fragment) OS=Ixodes  | <i>Ixodes scapularis</i>          | 1 | 0.010 |
| tr A9QQ53 A9QQ53_LYCSI 60S ribosomal protein L13 (Fragment) OS=Lycosa singorie  | <i>Lycosa singoriensis</i>        | 1 | 0.010 |
| <b>Proteins identified with 1% &lt; FDR &lt; 5%</b>                             |                                   |   |       |
| tr B7QCA7 B7QCA7_IxOSC Glucosidase II, putative (Fragment) OS=Ixodes scapulari  | <i>Ixodes scapularis</i>          | 1 | 0.010 |
| tr B7PR58 B7PR58_IxOSC GTP binding protein Rab-1A OS=Ixodes scapularis GN=IscW  | <i>Ixodes scapularis</i>          | 2 | 0.010 |
| tr B7QCB8 B7QCB8_IxOSC 26S proteasome regulatory subunit 7, psd7, putative (Fr  | <i>Ixodes scapularis</i>          | 1 | 0.010 |
| tr A9QQ67 A9QQ67_LYCSI 40S ribosomal protein S3a OS=Lycosa singoriensis PE=2 S  | <i>Lycosa singoriensis</i>        | 2 | 0.010 |
| tr B7Q760 B7Q760_IxOSC Nucleotide excision repair factor NEF2, RAD23 component  | <i>Ixodes scapularis</i>          | 2 | 0.010 |
| tr B7PRH5 B7PRH5_IxOSC T-complex protein 1, delta subunit OS=Ixodes scapularis  | <i>Ixodes scapularis</i>          | 1 | 0.010 |
| tr B7P971 B7P971_IxOSC Calponin, putative OS=Ixodes scapularis GN=IscW_ISCW0030 | <i>Ixodes scapularis</i>          | 1 | 0.010 |
| tr B7PTK1 B7PTK1_IxOSC Multiple ankyrin repeats single kh domain protein, puta  | <i>Ixodes scapularis</i>          | 1 | 0.010 |
| tr B7PIP9 B7PIP9_IxOSC Ankyrin 2,3/unc44, putative OS=Ixodes scapularis GN=IscW | <i>Ixodes scapularis</i>          | 2 | 0.010 |
| tr B7PKZ9 B7PKZ9_IxOSC BRI1-KD interacting protein, putative OS=Ixodes scapula  | <i>Ixodes scapularis</i>          | 1 | 0.010 |
| tr B7Q362 B7Q362_IxOSC Eukaryotic translation initiation factor 4 gamma, putat  | <i>Ixodes scapularis</i>          | 1 | 0.011 |
| tr B7P6L7 B7P6L7_IxOSC 26S proteasome regulatory complex, subunit PSMD5, putat  | <i>Ixodes scapularis</i>          | 1 | 0.011 |
| tr B7PU84 B7PU84_IxOSC Putative uncharacterized protein (Fragment) OS=Ixodes s  | <i>Ixodes scapularis</i>          | 1 | 0.011 |
| tr B7PD93 B7PD93_IxOSC Ran-binding protein, putative OS=Ixodes scapularis GN=I  | <i>Ixodes scapularis</i>          | 1 | 0.011 |
| tr B7QMM9 B7QMM9_IxOSC Polyadenylate-binding protein-interacting protein, puta  | <i>Ixodes scapularis</i>          | 1 | 0.011 |
| tr B7P9A9 B7P9A9_IxOSC HyFMR1 protein, putative (Fragment) OS=Ixodes scapulari  | <i>Ixodes scapularis</i>          | 1 | 0.011 |
| tr B7PAK1 B7PAK1_IxOSC Integrin beta (Fragment) OS=Ixodes scapularis GN=IscW_I  | <i>Ixodes scapularis</i>          | 1 | 0.011 |
| tr B7PAI0 B7PAI0_IxOSC Ribosomal protein L28, putative OS=Ixodes scapularis GN= | <i>Ixodes scapularis</i>          | 1 | 0.011 |
| tr B7P230 B7P230_IxOSC Translation initiation factor 2C, putative OS=Ixodes sc  | <i>Ixodes scapularis</i>          | 1 | 0.011 |
| tr A8E4J9 A8E4J9_9ACAR Calreticulin OS=Haemaphysalis qinghaiensis PE=2 SV=1     | <i>Haemaphysalis qinghaiensis</i> | 1 | 0.011 |
| tr B7PM02 B7PM02_IxOSC Proteasome beta2 subunit, putative OS=Ixodes scapularis  | <i>Ixodes scapularis</i>          | 1 | 0.012 |
| tr A6N9M1 A6N9M1_ORNPR 40S ribosomal protein S2/30S OS=Ornithodoros parkeri PE= | <i>Ornithodoros parkeri</i>       | 2 | 0.013 |

|                                                                                 |                           |   |       |
|---------------------------------------------------------------------------------|---------------------------|---|-------|
| tr Q4PM69 Q4PM69_IxOSC Histone H4 OS=Ixodes scapularis GN=IscW_ISCW019498 PE=3  | <i>Ixodes scapularis</i>  | 2 | 0.013 |
| tr B7Q3Z3 B7Q3Z3_IxOSC 26S proteasome regulatory subunit rpn1, putative OS=Ixo  | <i>Ixodes scapularis</i>  | 2 | 0.014 |
| tr B7Q7H2 B7Q7H2_IxOSC Kinesin light chain, putative OS=Ixodes scapularis GN=I  | <i>Ixodes scapularis</i>  | 1 | 0.014 |
| tr B7PXJ6 B7PXJ6_IxOSC Glyoxylate/hydroxypyruvate reductase, putative (Fragmen  | <i>Ixodes scapularis</i>  | 2 | 0.014 |
| tr B7PUB0 B7PUB0_IxOSC Secreted protein, putative OS=Ixodes scapularis GN=IscW  | <i>Ixodes scapularis</i>  | 1 | 0.016 |
| tr B7PJZ9 B7PJZ9_IxOSC Dynein light chain OS=Ixodes scapularis GN=IscW_ISCW003  | <i>Ixodes scapularis</i>  | 1 | 0.017 |
| tr B7P377 B7P377_IxOSC Lim and sh3 domain protein 1, lasp-1, putative OS=Ixode  | <i>Ixodes scapularis</i>  | 1 | 0.017 |
| tr B7Q310 B7Q310_IxOSC Putative uncharacterized protein OS=Ixodes scapularis G  | <i>Ixodes scapularis</i>  | 1 | 0.017 |
| tr B7P8J4 B7P8J4_IxOSC ATP-dependent RNA helicase, putative (Fragment) OS=Ixode | <i>Ixodes scapularis</i>  | 1 | 0.017 |
| tr B7PAG0 B7PAG0_IxOSC THO complex subunit, putative OS=Ixodes scapularis GN=I  | <i>Ixodes scapularis</i>  | 1 | 0.017 |
| tr B7PXG9 B7PXG9_IxOSC Glutathione S-transferase, putative OS=Ixodes scapulari  | <i>Ixodes scapularis</i>  | 1 | 0.017 |
| tr B7PKQ6 B7PKQ6_IxOSC Cell division protein, putative (Fragment) OS=Ixodes sca | <i>Ixodes scapularis</i>  | 1 | 0.017 |
| tr B7PVP6 B7PVP6_IxOSC Rho/RAC guanine nucleotide exchange factor, putative OS= | <i>Ixodes scapularis</i>  | 1 | 0.017 |
| tr B0LUH3 B0LUH3_IxORI Thioredoxin peroxidase OS=Ixodes ricinus PE=2 SV=1       | <i>Ixodes ricinus</i>     | 1 | 0.017 |
| tr B2YGD3 B2YGD3_9ARAC Actin (Fragment) OS=Galianora bryicola PE=4 SV=1         | <i>Galianora bryicola</i> | 1 | 0.017 |
| tr B7QFT9 B7QFT9_IxOSC Lectin, putative OS=Ixodes scapularis GN=IscW_ISCW01262  | <i>Ixodes scapularis</i>  | 1 | 0.017 |
| tr B7PR90 B7PR90_IxOSC Ribosomal protein L13A, putative OS=Ixodes scapularis GN | <i>Ixodes scapularis</i>  | 1 | 0.017 |
| tr B7QL56 B7QL56_IxOSC DNA replication licensing factor, putative (Fragment) O  | <i>Ixodes scapularis</i>  | 1 | 0.017 |
| tr B7Q4R6 B7Q4R6_IxOSC Ku P70 DNA helicase, putative (Fragment) OS=Ixodes scap  | <i>Ixodes scapularis</i>  | 1 | 0.017 |
| tr B7PKK7 B7PKK7_IxOSC Ubiquitin carrier protein OS=Ixodes scapularis GN=IscW_  | <i>Ixodes scapularis</i>  | 1 | 0.018 |
| tr B7PCH9 B7PCH9_IxOSC Histidine triad nucleotide binding protein, putative (F  | <i>Ixodes scapularis</i>  | 1 | 0.018 |
| tr B7PT80 B7PT80_IxOSC Spindle pole body protein, putative OS=Ixodes scapulari  | <i>Ixodes scapularis</i>  | 1 | 0.019 |
| tr B7QF74 B7QF74_IxOSC Microsomal glutathione S-transferase, putative OS=Ixode  | <i>Ixodes scapularis</i>  | 1 | 0.019 |
| tr B7QMF1 B7QMF1_IxOSC Reductase, putative (Fragment) OS=Ixodes scapularis GN=I | <i>Ixodes scapularis</i>  | 1 | 0.019 |
| tr B7P555 B7P555_IxOSC Coronin, putative (Fragment) OS=Ixodes scapularis GN=Is  | <i>Ixodes scapularis</i>  | 1 | 0.019 |
| tr B7P1Y7 B7P1Y7_IxOSC Transcription factor S-II, putative OS=Ixodes scapulari  | <i>Ixodes scapularis</i>  | 1 | 0.019 |
| tr B7QF45 B7QF45_IxOSC 3-keto-acyl-CoA thiolase, putative OS=Ixodes scapularis  | <i>Ixodes scapularis</i>  | 1 | 0.019 |
| tr B7PGP8 B7PGP8_IxOSC Replication factor C, subunit RFC3, putative OS=Ixodes s | <i>Ixodes scapularis</i>  | 1 | 0.019 |
| tr B7PWX1 B7PWX1_IxOSC Phospholipase A-2-activating protein, putative (Fragment | <i>Ixodes scapularis</i>  | 1 | 0.020 |
| tr B7Q0N5 B7Q0N5_IxOSC Heat shock protein 70 (HSP70)-interacting protein, puta  | <i>Ixodes scapularis</i>  | 1 | 0.020 |
| tr B7Q0E8 B7Q0E8_IxOSC Serpin 7, putative OS=Ixodes scapularis GN=IscW_ISCW009  | <i>Ixodes scapularis</i>  | 1 | 0.020 |
| tr B7QDS2 B7QDS2_IxOSC Matricellular protein osteonectin/SPARC/BM-40, putative  | <i>Ixodes scapularis</i>  | 2 | 0.021 |

|                                                                                 |                             |   |       |
|---------------------------------------------------------------------------------|-----------------------------|---|-------|
| tr B7P367 B7P367_IxOSC Putative uncharacterized protein OS=Ixodes scapularis GN | <i>Ixodes scapularis</i>    | 1 | 0.021 |
| tr B7P3D3 B7P3D3_IxOSC FKBP-type peptidyl-prolyl cis-trans isomerase, putative  | <i>Ixodes scapularis</i>    | 1 | 0.021 |
| tr B7QD48 B7QD48_IxOSC Putative uncharacterized protein (Fragment) OS=Ixodes sc | <i>Ixodes scapularis</i>    | 1 | 0.021 |
| tr B7PIZ2 B7PIZ2_IxOSC ADP-ribosylation factor, putative (Fragment) OS=Ixodes   | <i>Ixodes scapularis</i>    | 1 | 0.022 |
| tr B7PCU5 B7PCU5_IxOSC 2-oxoglutarate dehydrogenase, putative OS=Ixodes scapul  | <i>Ixodes scapularis</i>    | 1 | 0.023 |
| tr A6N9M5 A6N9M5_ORNPR 40S ribosomal protein S20 OS=Ornithodoros parkeri PE=2   | <i>Ornithodoros parkeri</i> | 1 | 0.023 |
| tr B7PVQ8 B7PVQ8_IxOSC Putative uncharacterized protein OS=Ixodes scapularis G  | <i>Ixodes scapularis</i>    | 1 | 0.023 |
| tr B7Q347 B7Q347_IxOSC Putative uncharacterized protein OS=Ixodes scapularis G  | <i>Ixodes scapularis</i>    | 1 | 0.024 |
| tr B7PSJ2 B7PSJ2_IxOSC Proteasome subunit alpha type OS=Ixodes scapularis GN=I  | <i>Ixodes scapularis</i>    | 1 | 0.024 |
| tr A5HLD6 A5HLD6_9ARAC Heat shock protein 70kDa (Fragment) OS=Diguettia mojavea | <i>Diguettia mojavea</i>    | 1 | 0.024 |
| tr B5M794 B5M794_9ACAR Damaged-DNA binding protein DDB p127 subunit (Fragment)  | <i>Amblyomma americanum</i> | 1 | 0.025 |
| tr B7PRG2 B7PRG2_IxOSC 60S acidic ribosomal protein P0, putative OS=Ixodes sca  | <i>Ixodes scapularis</i>    | 1 | 0.025 |
| tr B5M799 B5M799_9ACAR Histone H2B OS=Amblyomma americanum PE=2 SV=1            | <i>Amblyomma americanum</i> | 1 | 0.025 |
| tr B7PFQ0 B7PFQ0_IxOSC 60S ribosomal protein L27, putative OS=Ixodes scapulari  | <i>Ixodes scapularis</i>    | 1 | 0.025 |
| tr B7PHX7 B7PHX7_IxOSC Adenylate kinase, putative OS=Ixodes scapularis GN=IscW  | <i>Ixodes scapularis</i>    | 1 | 0.026 |
| tr A9P773 A9P773_BOOMI Glycogen synthase kinase OS=Boophilus microplus GN=GSK-3 | <i>Boophilus microplus</i>  | 1 | 0.026 |
| tr B7PU34 B7PU34_IxOSC P2X purinoceptor, putative OS=Ixodes scapularis GN=IscW_ | <i>Ixodes scapularis</i>    | 1 | 0.026 |
| tr B7PVV2 B7PVV2_IxOSC Procollagen-lysine, 2-oxoglutarate 5-dioxygenase, putat  | <i>Ixodes scapularis</i>    | 1 | 0.026 |
| sp Q4PMB3 RS4_IxOSC 40S ribosomal protein S4 OS=Ixodes scapularis GN=RpS4 PE=2  | <i>Ixodes scapularis</i>    | 1 | 0.027 |
| tr B7PIV8 B7PIV8_IxOSC Putative uncharacterized protein (Fragment) OS=Ixodes s  | <i>Ixodes scapularis</i>    | 1 | 0.027 |
| tr B7PZ79 B7PZ79_IxOSC Proteasome subunit alpha type, putative OS=Ixodes scapu  | <i>Ixodes scapularis</i>    | 1 | 0.027 |
| tr B7Q650 B7Q650_IxOSC Reductase, putative (Fragment) OS=Ixodes scapularis GN=  | <i>Ixodes scapularis</i>    | 1 | 0.027 |
| tr B7QCU0 B7QCU0_IxOSC CDK inhibitor P21 binding protein, putative OS=Ixodes s  | <i>Ixodes scapularis</i>    | 1 | 0.031 |
| tr B7QLS5 B7QLS5_IxOSC Numb-associated kinase, putative OS=Ixodes scapularis G  | <i>Ixodes scapularis</i>    | 1 | 0.033 |
| tr B7P9Y8 B7P9Y8_IxOSC Protocadherin-16, putative OS=Ixodes scapularis GN=IscW  | <i>Ixodes scapularis</i>    | 1 | 0.033 |
| tr B7Q2Z7 B7Q2Z7_IxOSC Ribosomal protein S28, putative (Fragment) OS=Ixodes sc  | <i>Ixodes scapularis</i>    | 1 | 0.035 |
| tr B7PAM5 B7PAM5_IxOSC Peptidyl-prolyl cis-trans isomerase, putative OS=Ixodes  | <i>Ixodes scapularis</i>    | 1 | 0.036 |
| tr B7PKB9 B7PKB9_IxOSC Lumican, putative (Fragment) OS=Ixodes scapularis GN=Is  | <i>Ixodes scapularis</i>    | 1 | 0.036 |
| tr B7P9W6 B7P9W6_IxOSC 26S proteasome regulatory complex, subunit RPN5/PSMD12,  | <i>Ixodes scapularis</i>    | 1 | 0.040 |
| tr B7QF31 B7QF31_IxOSC Caspase, apoptotic cysteine protease, putative (Fragment | <i>Ixodes scapularis</i>    | 1 | 0.041 |
| tr Q4PMB6 Q4PMB6_IxOSC 60S ribosomal protein L7a OS=Ixodes scapularis PE=2 SV=  | <i>Ixodes scapularis</i>    | 1 | 0.042 |
| tr B7Q1G1 B7Q1G1_IxOSC Methylmalonyl coenzyme A mutase, putative OS=Ixodes sca  | <i>Ixodes scapularis</i>    | 1 | 0.045 |
| tr B7QL45 B7QL45_IxOSC La/SS-B, putative (Fragment) OS=Ixodes scapularis GN=Is  | <i>Ixodes scapularis</i>    | 2 | 0.046 |

|                                                                                  |                               |   |       |
|----------------------------------------------------------------------------------|-------------------------------|---|-------|
| tr B7Q0T6 B7Q0T6_I_XOSC Acetylcholinesterase, putative OS=Ixodes scapularis GN=  | <i>Ixodes scapularis</i>      | 1 | 0.047 |
| tr B7PXM3 B7PXM3_I_XOSC Putative uncharacterized protein OS=Ixodes scapularis G  | <i>Ixodes scapularis</i>      | 1 | 0.047 |
| tr B7PXA7 B7PXA7_I_XOSC Golgi reassembly stacking protein, putative OS=Ixodes s  | <i>Ixodes scapularis</i>      | 1 | 0.048 |
| tr B7QIF6 B7QIF6_I_XOSC Golgi protein, putative (Fragment) OS=Ixodes scapularis  | <i>Ixodes scapularis</i>      | 1 | 0.049 |
| <b>Proteins identified with 5% &lt; FDR &lt; 10%</b>                             |                               |   |       |
| tr B7QDQ3 B7QDQ3_I_XOSC Molecular chaperone, putative OS=Ixodes scapularis GN=I  | <i>Ixodes scapularis</i>      | 1 | 0.050 |
| tr B7QAM6 B7QAM6_I_XOSC Protein disulfide isomerase, putative (Fragment) OS=Ixo  | <i>Ixodes scapularis</i>      | 1 | 0.051 |
| tr B7QJ34 B7QJ34_I_XOSC OTU domain, ubiquitin aldehyde binding protein, putativ  | <i>Ixodes scapularis</i>      | 1 | 0.051 |
| tr B7Q1W9 B7Q1W9_I_XOSC Dihydrolipoamide acetyltransferase, putative (Fragment)  | <i>Ixodes scapularis</i>      | 1 | 0.052 |
| tr B7P2P0 B7P2P0_I_XOSC Membrane protein, putative OS=Ixodes scapularis GN=IscW  | <i>Ixodes scapularis</i>      | 1 | 0.052 |
| tr B7Q792 B7Q792_I_XOSC Putative uncharacterized protein (Fragment) OS=Ixodes s  | <i>Ixodes scapularis</i>      | 1 | 0.054 |
| tr B7PV46 B7PV46_I_XOSC Putative uncharacterized protein OS=Ixodes scapularis G  | <i>Ixodes scapularis</i>      | 1 | 0.054 |
| tr Q6W976 Q6W976_9ARAC Sodium/potassium ATPase alpha subunit (Fragment) OS=Opi   | <i>Opiliones sp.</i>          | 1 | 0.054 |
| tr B7PSW5 B7PSW5_I_XOSC Programmed cell death 6-interacting protein, putative O  | <i>Ixodes scapularis</i>      | 1 | 0.056 |
| tr B7Q6Y7 B7Q6Y7_I_XOSC RNA-binding protein musashi, putative OS=Ixodes scapula  | <i>Ixodes scapularis</i>      | 1 | 0.056 |
| tr B7PGQ2 B7PGQ2_I_XOSC Calnexin, putative OS=Ixodes scapularis GN=IscW_ISCW003  | <i>Ixodes scapularis</i>      | 1 | 0.056 |
| tr B7P924 B7P924_I_XOSC Rap1 GTPase-GDP dissociation stimulator, putative OS=Ix  | <i>Ixodes scapularis</i>      | 1 | 0.059 |
| tr B7Q5F9 B7Q5F9_I_XOSC Glyoxalase, putative OS=Ixodes scapularis GN=IscW_ISCW0  | <i>Ixodes scapularis</i>      | 1 | 0.059 |
| tr B7PAD5 B7PAD5_I_XOSC Microtubule-binding protein, putative (Fragment) OS=Ixo  | <i>Ixodes scapularis</i>      | 1 | 0.059 |
| tr B7PYD1 B7PYD1_I_XOSC ATP-dependent RNA helicase, putative (Fragment) OS=Ixo   | <i>Ixodes scapularis</i>      | 1 | 0.059 |
| tr B7Q3D3 B7Q3D3_I_XOSC ATP-citrate synthase, putative OS=Ixodes scapularis GN=I | <i>Ixodes scapularis</i>      | 1 | 0.059 |
| tr B7P163 B7P163_I_XOSC Eukaryotic translation initiation factor 3 subunit C, p  | <i>Ixodes scapularis</i>      | 1 | 0.060 |
| tr B7PXW1 B7PXW1_I_XOSC Ribosomal protein S25, putative (Fragment) OS=Ixodes sc  | <i>Ixodes scapularis</i>      | 1 | 0.063 |
| tr B7PT39 B7PT39_I_XOSC Putative uncharacterized protein (Fragment) OS=Ixodes s  | <i>Ixodes scapularis</i>      | 1 | 0.063 |
| tr B7PYR8 B7PYR8_I_XOSC Putative uncharacterized protein OS=Ixodes scapularis G  | <i>Ixodes scapularis</i>      | 1 | 0.063 |
| tr B7QMC8 B7QMC8_I_XOSC Alpha-macroglobulin, putative (Fragment) OS=Ixodes scap  | <i>Ixodes scapularis</i>      | 1 | 0.063 |
| tr B5TMF7 B5TMF7_DERVA Glyceraldehyde 3-phosphate dehydrogenase OS=Dermacentor   | <i>Dermacentor variabilis</i> | 1 | 0.063 |
| tr B7QLA4 B7QLA4_I_XOSC Phosphatidylethanolamine-binding protein, putative OS=I  | <i>Ixodes scapularis</i>      | 1 | 0.066 |
| tr Q4PLY0 Q4PLY0_I_XOSC F1F0-type ATP synthase subunit g OS=Ixodes scapularis P  | <i>Ixodes scapularis</i>      | 1 | 0.068 |
| tr B7PMA8 B7PMA8_I_XOSC Putative uncharacterized protein OS=Ixodes scapularis G  | <i>Ixodes scapularis</i>      | 1 | 0.080 |
| tr B7PF38 B7PF38_I_XOSC (S)-2-hydroxy-acid oxidase, putative OS=Ixodes scapular  | <i>Ixodes scapularis</i>      | 1 | 0.080 |
| tr B7PQ21 B7PQ21_I_XOSC DEAD box ATP-dependent RNA helicase, putative (Fragment  | <i>Ixodes scapularis</i>      | 1 | 0.081 |

|                                                                                 |                                         |   |       |
|---------------------------------------------------------------------------------|-----------------------------------------|---|-------|
| tr B7QIE9 B7QIE9_IXOSC Nudix hydrolase, putative OS=Ixodes scapularis GN=lscW_  | <i>Ixodes scapularis</i>                | 1 | 0.082 |
| tr B7P4E1 B7P4E1_IXOSC Glutamate dehydrogenase, putative OS=Ixodes scapularis   | <i>Ixodes scapularis</i>                | 1 | 0.082 |
| tr B7QH59 B7QH59_IXOSC Nuclear distribution protein NUDC, putative (Fragment)   | <i>Ixodes scapularis</i>                | 2 | 0.083 |
| tr B7PLL8 B7PLL8_IXOSC Estradiol 17-beta-dehydrogenase, putative OS=Ixodes sca  | <i>Ixodes scapularis</i>                | 1 | 0.084 |
| tr B7PPR8 B7PPR8_IXOSC FK506 binding protein (FKBP), putative OS=Ixodes scapul  | <i>Ixodes scapularis</i>                | 1 | 0.084 |
| tr B7PKP9 B7PKP9_IXOSC Glyceraldehyde 3-phosphate dehydrogenase OS=Ixodes scap  | <i>Ixodes scapularis</i>                | 1 | 0.087 |
| tr Q26229 Q26229_RHIAP Autoantigen OS=Rhipicephalus appendiculatus PE=2 SV=1    | <i>Rhipicephalus<br/>appendiculatus</i> | 1 | 0.088 |
| tr B7PL00 B7PL00_IXOSC Antiviral helicase Slh1, putative OS=Ixodes scapularis G | <i>Ixodes scapularis</i>                | 1 | 0.088 |
| tr B7PYA7 B7PYA7_IXOSC Putative uncharacterized protein OS=Ixodes scapularis G  | <i>Ixodes scapularis</i>                | 1 | 0.090 |
| tr B7PZS8 B7PZS8_IXOSC Protein transport protein sec23, putative OS=Ixodes sca  | <i>Ixodes scapularis</i>                | 1 | 0.090 |
| tr B7PKV8 B7PKV8_IXOSC RNA-binding protein, putative OS=Ixodes scapularis GN=l  | <i>Ixodes scapularis</i>                | 1 | 0.095 |
| tr B7PNU5 B7PNU5_IXOSC Glutamine synthetase, putative OS=Ixodes scapularis GN=  | <i>Ixodes scapularis</i>                | 1 | 0.095 |
| tr B7P7A4 B7P7A4_IXOSC Importin, putative OS=Ixodes scapularis GN=lscW_ISCW016  | <i>Ixodes scapularis</i>                | 1 | 0.097 |
| tr Q17248 Q17248_BOOMI Angiotensin-converting enzyme-like protein OS=Boophilus  | <i>Boophilus microplus</i>              | 1 | 0.098 |

<sup>a</sup> Number of peptides by which proteins were identified.

<sup>b</sup>False discovery rate (FDR) is used as a measure of statistical significance of peptide identification and is calculated using the refined method proposed by<sup>174</sup>.

**Supplementary Table 36. Summary of F statistics for filtered RAD loci.** Heterozygosity within a subpopulation of *I. scapularis* collected from different geographic regions and the Wikel laboratory colony.

| Sample            | n  | T         | % pol | SNP     | Private | P     | H <sub>o</sub> | H <sub>E</sub> | F <sub>IS</sub> | π     |
|-------------------|----|-----------|-------|---------|---------|-------|----------------|----------------|-----------------|-------|
| <b>Mid West</b>   |    |           |       |         |         |       |                |                |                 |       |
| Wisconsin         | 12 | 3,365,898 | 7.08  | 589,587 | 51,068  | 0.989 | 0.013          | 0.016          | 0.012           | 0.017 |
| Indiana           | 10 | 3,368,281 | 4.76  | 581,843 | 22,650  | 0.990 | 0.013          | 0.014          | 0.006           | 0.015 |
| <b>North East</b> |    |           |       |         |         |       |                |                |                 |       |
| Maine             | 10 | 3,654,874 | 6.31  | 622,432 | 35,573  | 0.989 | 0.013          | 0.016          | 0.011           | 0.017 |
| New Hampshire     | 10 | 3,433,477 | 6.40  | 594,562 | 34,352  | 0.989 | 0.013          | 0.016          | 0.011           | 0.017 |
| Massachusetts     | 7  | 3,362,822 | 5.52  | 584,514 | 26,532  | 0.989 | 0.014          | 0.015          | 0.007           | 0.017 |
| <b>South East</b> |    |           |       |         |         |       |                |                |                 |       |
| Virginia          | 10 | 3,180,531 | 5.22  | 555,145 | 44,662  | 0.989 | 0.016          | 0.016          | 0.005           | 0.020 |
| North Carolina    | 5  | 3,709,763 | 5.56  | 636,280 | 66,486  | 0.988 | 0.015          | 0.017          | 0.011           | 0.019 |
| Florida           | 5  | 2,741,357 | 7.48  | 500,178 | 80,789  | 0.988 | 0.016          | 0.018          | 0.010           | 0.019 |
| <b>Reference</b>  |    |           |       |         |         |       |                |                |                 |       |
| Wikel             | 5  | 3,786,899 | 3.80  | 628,131 | 22,051  | 0.990 | 0.014          | 0.013          | 0.003           | 0.015 |

n - number of analyzed individuals from each population; T - the number of RAD loci; % pol - percentage of polymorphic loci; SNP - total number of SNPs; private - the number of private SNPs; P - average frequency of the more common allele; H<sub>o</sub>, H<sub>E</sub> – observed and expected heterozygosity at polymorphic sites; F<sub>IS</sub> - fixation index across polymorphic sites; π – average nucleotide diversity (calculated across polymorphic and non-variant sites)

**Supplementary Table 37. Genetic variation among populations of *I. scapularis* collected from different geographic regions of the U.S. and the Wikel laboratory colony.**  $F_{ST}$  values are shown as a measure of differentiation.  $F_{ST} = <0.05$ , low genetic variation (light tan shading);  $F_{ST} = 0.05-0.15$ , moderate genetic variation (tan shading);  $F_{ST} = 0.15-0.25$ , high genetic variation (orange shading);  $F_{ST} = >0.25$ , very high genetic variation<sup>178</sup>.

| Location   | Sample | IN    | ME    | NH    | MA    | VA    | NC    | FL    | Wikel |
|------------|--------|-------|-------|-------|-------|-------|-------|-------|-------|
| Mid West   | WI     | 0.045 | 0.037 | 0.040 | 0.042 | 0.100 | 0.119 | 0.102 | 0.072 |
|            | IN     |       | 0.055 | 0.057 | 0.064 | 0.132 | 0.153 | 0.124 | 0.106 |
| North East | ME     |       |       | 0.038 | 0.043 | 0.106 | 0.127 | 0.106 | 0.078 |
|            | NH     |       |       |       | 0.046 | 0.105 | 0.125 | 0.104 | 0.079 |
|            | MA     |       |       |       |       | 0.119 | 0.139 | 0.113 | 0.092 |
| South East | VA     |       |       |       |       |       | 0.091 | 0.079 | 0.142 |
|            | NC     |       |       |       |       |       |       | 0.072 | 0.161 |
|            | FL     |       |       |       |       |       |       |       | 0.123 |

Abbreviations: Indiana, IN; Maine, ME; New Hampshire, NH; Massachusetts, MA; Virginia, VA; North Carolina, NC; Florida, FL; Wisconsin, WI.

**Supplementary Table 38. Proposed tick and mite genomes, clinical significance and sequencing priority.**

| Acari Classification             | Species/Geographic Region                                   | Diseases Transmitted <sup>a</sup>                     | Sequencing Priority |
|----------------------------------|-------------------------------------------------------------|-------------------------------------------------------|---------------------|
| <b>Superorder Acariformes</b>    | <i>Leptotrombidium deliense</i><br>Asia                     | Scrub typhus                                          | <b>Tier 1</b>       |
| <b>Superorder Parasitiformes</b> | <i>Ixodes scapularis</i><br>Nth. America                    | LD, HGA, babesiosis, POW                              |                     |
| Family Ixodidae<br>(hard ticks)  | <i>Ixodes pacificus</i><br>Nth. America                     | LD, HGA                                               | <b>Tier 2</b>       |
| Lineage Prostriata               | <i>Ixodes ricinus</i><br>Africa/Eurasia                     | LD, TBE, babesiosis, HGA                              |                     |
|                                  | <i>Ixodes persulcatus</i><br>Eurasia                        | LD, TBE                                               |                     |
|                                  | <i>Dermacentor variabilis</i><br>Nth. & Central America     | RMSF, tularemia, anaplasmosis, tick-induced paralysis |                     |
| Lineage Metastrata               | <i>Amblyomma americanum</i><br>Nth., Central & Sth. America | HME, STARI, tularemia                                 | <b>Tier 3</b>       |
| Family Argasidae<br>(soft ticks) | <i>Ornithodoros turicata</i><br>Nth. America                | TBRF                                                  |                     |

<sup>a</sup>From<sup>186,187</sup>; human babesiosis (*Babesia microti*); HGA, human granulocytic anaplasmosis (*Anaplasma phagocytophilum*); HME, human monocytic ehrlichiosis (*E. chaffeensis*); LD, Lyme disease (*Borrelia burgdorferi*); POW, Powassan virus; RMSF, Rocky Mountain spotted fever (*Rickettsia rickettsii*); scrub typhus (*Orientia tsutsugamushi*); STARI, southern tick-associated rash illness (*Borrelia lonestari*); TBRF, tick-borne relapsing fever (*Borrelia turicatae*); ND, not determined.

## **Supplementary Note 1**

### **Predicted Protein Sequence of *Ixodes scapularis* Gustatory Receptors (GRs)**

>IsGr1FIX

MLRGFQLQSKFCRVSGCLFLPGLLTNPLETVSVTWKSWYSFYSAFCFLFFVGYESNLITRYVLKIDGSDHLFSQSLI  
VLMHVVVVLKSVVNYISMITGSRISILDFLRESALFEEAIDFPSCCKCIPKEYFRADVKRILLFVVFFLVYCVGTHFQ  
LNDVFGSEKPWSAQYVMYRVCGMLTGILFFTYDSLHFVSVKVC SKVLGEYIKTQLKVIETCVSHSPGGSLEQAADV  
EAVRMRLCIIRNLKTTLNDVWNRSIVTSCACQILVLCIAIFTVCTGGLARQDLWMALAYSLEYTVYETVDLANVSQSM  
ANNVQNVEACKRAATFDGPEFFIQIQIYLHNSINPQDFTVVGDDFFSIDMPLLVSITGSVITYSVILVQTSQEFDI  
NTNVDGANGTRPGSVPGS

>IsGr2FIX

MLRSFQLQARFCRVCGCLFLPGLLTNP LDTVKTWQSWYTFYSAACFIFFVWYEFNLITRYVLMIDGSDHLFTQSLH  
VLMHIVVVVLKSLVNYVSMISGSRISILDFFREAESFEGTIDIPSCCKCVFKTFMWADVRRMLLFVAYLAIYLAGTHFQ  
LIDVLGGQELGSEQYVLYRVGAVFAGILFFTYDSLHFVSLKVC SLVLEEYVKTQCKVIEVCVSLRPTGSMDQTAKEV  
ETVRVRLCVIGNLKTTLNDVWNRSIVTSCACQILVVCIAIFTICTGGLARQELWLALIYSLYTVYETVDLASVSQSL  
SNSMKKIKNACKGAPTFEGTEAYNKQIQHLHNSINPQDINVVGGDLFRIDMPLLVSITGSVITYSVILVQTSQEFDI  
NTNVEGANGTRPGY

>IsGr3FIX

MLQRCVPFAIACRLFGCFFIHNFPKSLDQAKVSWKSLEYTLYSFTCFIAYLVSEIAYVIRYVDELGKISRFSRSLH  
LLVHVVITARIATNVAAMLMGPEKLLAFFRQSESEFEKAIDFTTRQSRSLRTSAFERWAALRAFLSLSGMAFCYAAAGVN  
FLMGQLEESLGSRWVIPTRIVGFFMITAVLLYDSLLYLFLRSSAKVFGEYMHTLLGAFKKCKRYRSIRSRGVSCHI  
EFIRSNMNEVKRLKEALSIDIWTPLMVASASLVIMNSFVFSAVIQDGLKKELWWAVTYSLYSTLSFIDLAYVSQALV  
NEARKLKDAILVVPTYDATDDFSQQLRYLHETIDPDGMCFGGGGFFALKNSLLVSMTGAILVYTVILVQTSQSDTMDHK  
MDAT

>IsGr4CTE

MISFMHQRCVPYAILGRLYGCFFVHNFWRKSLGDAHVTWKSLEYTVYSFGFFVIYLLGEIMFATSFARDVKDVSDAFS  
RHLLILVHGVVTTTRLANSVAMLT KPNKLLAFFRKSEAFEKDTAFSLRTYSLC SSVHRWNAMRAFAAFLGLTLSYS  
VAIQFLAMEHGEQILSQMAVPVKLVGFIMTTGFFVYDSMLYLFLRSCINVLVEYTTQFQLVVFREQNLLFRPGEPSKI  
EAMRLSLNKMRLKELLNDIWAGPLIVACASTVITDCVILDAMFYDGMKQELWIIAAYALSASLSFIDLACTGQTLI  
DEARKLKSAMLMVRAYGEPDRYLKQLRXYLYEGFDPEGMCLDGGGFFVLRKSLLLP

>IsGr5INT

MISLMQRQFLPYALLCRLGGCFFIPRFWKPLEDAKVTWRSLEYTAYSFAVASWFSVELTFIVKRCHIYSNLSYHDFP  
SLVLLILRATVSLKALLNFVTMATGSSGLVKFFRKASVFEKTTGFLPSSRCPKGVWKDRWSFLRRFFVQGVVSSYV  
FSTLLSSVSLTADLPADFGFLGKLGAULTGMYLLYDVFPYIVLSSCSSVLVAYLQAQVKMFERCCRF EAVHNNMQ  
SQQLEVIRHNLGGIRD LKHSNAIWEAPLVAMSVGVLLDVCVVFYAI FHDGFFRSHVRLAMSICYSSFAFMDMACI  
SQALTDEAQKLKDATKAAYTFAATNGYVQQ MAGTMITYTVILSQTSDGLANKAVPRN

>IsGr6CTE

MSSYMQRQFVPYAILCRLGGCFFIQNFWKPLENAKVTWKSLEYTAYSVFFIALNFSLDIVLIVQESYVFRDLSQAFSP  
SLILVLRMVVTSKILLSAGTMATGSLGLEFFKKSSLYEKITGFSPARRDFRAFWKHRWSLFRILVLIGFICTYII  
SMLPFMYSLGELLPASFSFLGQISAVLGAWCYLLYDALPYMVLRSASAVLVEYLHVQLKTVQRCKVKPSRNERKSL

EQLEVIRHNMAKITDLKDCLNIAIAQVPLATMSAGVLIFDCVVCYAMFNDGFFATDVPLALSVCYVSSFAFLDLAFAS  
QALTDEAQKLSNATKVAPTFGASDEYVQELRYLHKTIDPDGMCLSAGGFFRLNKSLLLT

>IsGr7INT

MTSFMQRQFVPPYAIPFRVGGCFFIENFWKPLEHARITWSNLYVAYSASLVGVVSFGVEMWDIVESSDILNNLSHALYP  
CLLLILRAITNFKLLLNVVTMATGSIKFLEFFKKASIFEKATRFSPVRRGFWFFLTNHWSFMRQLVLIISLTSNCVI  
SMVAFAVTVTNLLPNSFRFIGGLIAALICTCYLIYDVLPIVLRSCSAVLVDYLQAQLRLFESCCNAKAVRAEGHLS  
RQLEAIRHNFGMIRDLKESLNAIWQLPLAVMSVTVLLLVCVDCYGMFHDTFQGLGILLAVSYCLYAAFALVDLACVS  
QFLTDEAQKFKNATKMALTFEVTGRHVQQMAGTFITYTVIIAQTEELRNKATSGNSTIPN

>IsGr8PSE

MQWQFVSYAIIIIWIGACFCIQNFZKSPDNAKATWMSLYIACSACLVVVFFCFEITPILKIFIAFNDLSHVFSSSLVF  
ILRCLVCFKVLVNRSMATGTNRLLEFFKKSSIFEKKKTEFSPCSRGRDILRPRWSFZRRSLVVLVTVSTYAILTZ  
NLMSSLKQVYPLMZTFWASVLLSYLGZPTSSTILPHSWSZGTTLQSWWSIFKLNZNFWNVAVNDSLFE LRSC LNNLV  
IHHNIGNMZYLKDSLNVMMQVPLIVMSAGIILLVCVACHPMFRLXFAPKFPLTASSSVYPSLAFIDMVFSSQSLPG  
EAE NFKIASKKAF AFEAVD GIRHQ

>IsGr9

MKSLMLHRFYAYGLLCRIGGCFFIQNFNRHSLDKARIAWKSlyTLySALCVLFSFGFFIWFdVAFIIREASTAYGLS  
GLFSETLSLTLHAVVSSRILINLSLMIAGSGKLLDFFRRAVIFEQTTFEPAKCCAPLSRKPGWSLLRRTLvvvtla  
TSYVLLVNFYIVHYTGAISPEWALTSKVVGSIAAVFLFLYDSLcyVVLRCcSGVLLEYVSAQLRAFQDCSKPKDILP  
QMQASRQLETIRLNVCSIRELTQILNSIWKASLAGKCAGIILANCVVLYSMFHDGVFKRQIwvtLSYcAYSSlAFLE  
LVFISQALIDETQELKNATKKVRTSDATDNyAQELQYLHQSIDPKGMCLSGGGFFRLSKSLLVTMAGSIITYTVILV  
QTSDELTSKMESVGAPPGS

>IsGr10

MRSFMLQRfAGYgKLCrIGGCFFIQNFHkESLASARVTWKCPyTLySILCVCFVFSFEVAFALRMrvLSLFSSRFT  
QSLLFILHITIIIFKIFINFWAMATGSgKLLDFFRKAVIFEKSTGFSCVKGRFRWPIPRCLVLAALVANYVIGVRLF  
IGEVVNALPRQWILAATICGYVAGFGFVLYDSLpFVVLRcSTEALVEYTHSQMLAFKGCDRTKGACTDMNASRRIET  
IRLNLcNIrELNRLLNDMWKcPLTAMCANVILMSCIVLYSLFENGiyMREvWVLLyTLySALCFfELTLISQALSD  
EVQRlKDATRAVITTDATEDYLHQLRVLHDTIEPLGMCLSGGGFFSLKKPLLVSMTAAIITYTVILVQTSDDITEKT  
DVYSAFPRR

>IsGr11FIX

MSSyMLRRfARyGRLCRVGGCFFIKNFNEKSLEKATVTWKSlyTVYSTLCFCFFFWFEAAfIVQKAYVITFFSRsFA  
HSLLFILHTVVSCKIFVNFsAMVVGSakLLDFFRKSDTFEKSTGFaQPQKRSPMVRRSLVIVALVISYVIGIHLFV  
GDITNELPRQWVIAAKVSGYIAGVGFFLYDSLpFVVLmCCNEVLVEYTHaQLVHFkVCDRSKAACSDLDASRHMETI  
RINLCQIRKLKDTLNTVWKWPLAAMSASILLILCIVLYAVFDGGLFLRDIWIIlAYSVYSTLCFVEMTFVSQALMSE  
AQRLKDATKAVLTtDATDPYgKELRYLHDVIDPVDmCLTGgGFFRLKKSLLVSMAGAIITYAVILVQTSdALAERIG  
GDFSTTLKNWfNVTSSRNTTGESG

>IsGr12FIX

MNSFMLKRfAAyGMLCRLGGCFFIKDLRRNTLEKARVSWKSPyLLYSASCLTSIIAFQVTyIMKRVEVFNNISQTFs  
RLLLIILQTIITLKIGINFASMTTGSAKLLFFRKsATFEKSTGFpVCKGSWTTSSSTSPWSLLRRLCFAVALINSYV  
ITMHFFVgGLANNLPpQWILAGKIVGCIAGLFFFLYDSLpYVVLRCcSSVLVEYIRaQLITfERCNESNVFRLESQT  
TLQLEAIRCNLGfVKELKDSLNAAWKcPLAAMSTSIIFLVCVVFYSMFQDGVYKEQIWIAlSYCVYSSLSfVEMAYV

SQALMDEAQKLKDATKRVHTSHATDDYARQLRYLHDSIEPKGMCLSGGGFFRLNKSLLVSMAGAMITYTVILVQTNDSL  
GLSNKIDSSNASMVGGIVVREPL

>IsGr13FIX

MSSFMQRQFMPYAVLCRLGGCFFIRNFRKPLENSNVVCKSVYTAYSAFIILLCFSFQVILFIRKAHVFKNFSDHDFSP  
FLLHIVRTIMILKALLNAVIMATGSATLLEFFRKSSAFEKTTGFSPSTQGVRGIWRRRWSFFRQSLVVIGAVITYFI  
SAIPFITSLTEMLPTDLHFLRKLGVVITAYYLLYDALPYMVLRSCTVLIAYLQFQRKMFERCCELKSSYNKTELS  
GQLEVIRHHLGHIRDLDKDFLNTIWQVPLAAMSAAILLCACIVCYTMFHDGFSÆDIPLAVSFCVYSSSLAFVDMALVS  
QTLHDEAQKLKKNATKTAFTFEAADVCVQQLRYLHETIDPKGMYLCGGGFLRINKALLVSMAGTMITYTVIISQTS  
DGLANKAAPT

>IsGr14

MQSVMLERFSLYGQLCRYGGCFFIQQLKSLNAAKVVWKDLYTLYSATCVIFSFSFFLLLEVLVLETNNFSTSIQSD  
KFSDILIQTHVHVSSKVLVNFLSMATGSGDLLNYFKKAAFEKRSQFVPSKRCVRTLGEERWSLFRRVLVLVALAT  
SYILFMHFYVAHVADTVARVWAIACKIIGPIAGFLFFLYDTLCYGVLRCCSGVLLEYIRAQLREFEDCTRSNGALSG  
TEACRRLERIRLNMCSIRELSQNLNSTWNASLAATVAGIILANCVVSYIFIDGIFEREVWIALAYCVYTSLVVLEL  
VYMSQALMDETQKLKKNATKNIRPFDLSRDCSQELRYLHDSIDPKDMCLTGGGFFRLNKPLLVSITGSIITYTVILVQ  
TSNKLTSSTDFVVAPPAPYHK

>IsGr15

MSSYMLQRFAGYGMLCRFGGCFFIQNFSKKSLEKATVTWKSPYTVYSILCFCFFWFÆAFIVQKAYVLTIFSRQFA  
RSLFLILHTTVVYTIKIFVNFSAMVMGTTKLLDFFRMSGAFEHSTGFRIPEKHRWPMARCCLVAVLVISYAIGIHFFV  
GEVTNGLPRQWVIAAKVCGYIAGAGFFLYDSLPPFVLRCCTEVLVEYIHAQSLSFRDCDRSKVARTDQDASREIENI  
RINLSQIRKLKDTLNDVWKLPLAAMSASILLILCVVLYSVFDNGLYLRDIWIILTYSAYSTLCFLEMTCVSQALMDE  
AQRLKDAVRAPVPTTDATEAYVQQLRYLHDVIDPDMCLTGGGFFCIKKSLLVSMAGAIITYTVILVQTSDELAQKID  
DALPTTSLKNWFNFSSTNAISQDG

>IsGr16FIX

MSSVMLRNFLPYGRFCRFGCLFIQNFRKRPESMRVQWMSWYTIYSAFCFAVFAIVQASYIFERVILFTNIRLFTK  
SLFIVMQFAIVTKIVVNLSSNILGAASMVRFFRECAVFETSTGFSPPKPARRLKFCHCIRLAMTLAFLVCSVLSTTF  
LIRRLSPASGVLDVFKIASVFSNYLFFVYDTHHFLILRPCSEVLILYIKAQADILSSALRVPDCWKRAATVDAVE  
RVRLNNCKIRNLKTNLNGVWKASIVTSSVVILLMVCVAVYSAFDAGVPRSHLVLSMAYGVYSTLDFVDMATLSQTLV  
NEAQKIKDSLKKVLTCAQASESYVNQVHYLHNSLNPSDMALSGGGFFRLDMALLVSITGSIITYTVILVQTSSEGA  
EHS MARNITRYYVRVSNRTNFRTRLRLTHSP

>IsGr17CTE

MSSYMLQKFATYAMLCRLGGCFFIQNFRKDSLNTARVSWKSPYTLTYASCLAVIAIYQVTYMVKRVDILEDISR  
NFS LSLILILQATITLKIAINFVSMVAGSARLLEFLQNSAAFEKSTCFLLCKGHGPSSSRPWSLLRRLCIICALINSYV  
LAMHFFVGGLLTALPAEWILAGKIMGSVTGLFFLYDSLPPVLRCTAVLVEYVRAQLIIFERCNRSNVFTLGSQ  
ASQLLQVIRCNLVTIKELKQSLNAAWQCALAASSTGILFVVCIVVYSLFHEGLYKYHILTALSYCVYSSLSFMEIAY  
VSQALADE

>IsGr18

MSSFMQRQFVPPYAILCRLGGCFYIQNFRKPLENAEVTWKTLYTVYSALIVSFFFAFEMSSI I KISFVFRDLSRAFTA  
SLMMLLRCLCLKILVNTATMATGSSRLLEFFEKSSTYETISGFSPASRGVRGLWRHRWSFFCRSLVVLGVISTYVM  
LTMYFTVSLMKLLPANLRFGLIPSGVLFVNYILYDALPYMVLRSCTAVLVDYLQAQLKSFESCKSRSARCDRQLP  
RQLEVIRYNLGVIRDLKDSFNAIWHVPLAAMSAGLILLVCVVWYAIIFYEGLFAPQITLSASYCLYSSFAFIDMACVS

QALTDEAQKLKNVTKIAFTFEVTDGYTQQLRYLHETIDPDDMCLSGGGFFRLNKSLLVSMAGTMITYTVIISQTS  
LTDG  
LTNNATPTN

>IsGr19FJ

MQPKGPLSPVMLRRFAAFGMLCRLGGCFFIQTFFSSKSMENAKVSWKNFYTIYSASCFVSIASFQVAYVIHRAEILSD  
ITHSFERSILLILSSTVSLKMIINFVSIIMAGSSRLLEFFRNSARFEASTGFLSARPFASVATNHLWSKFHRLVAVA  
LAISYAVGFHFFVSGLTELLPPQWILTGNILGVFVCALFHLYNSIPYMLRCCSSVLVEYMRAQFVQFEGCKGLQGD  
SSDAHASQAIEVVRLNLGVIKQLKDSLNTWHWSLGATCSGIIIFMTCVVLFTMFQDGVHREIWSVSVFLVSWLSF  
LELVYVSQALVDEAQKLKDATKVAPMLHAAEGYIQQLRYLHDTIDPKGMCLSGGGFFRLNKSLLVSMGTGSIITYTVI  
LSQNSDDLSQLKIDLYS

>IsGr20JI

MQPKGPLSPVMLRRFAAFGMLCRLGGCFFIQTFFSSKSMENAKVSWKNFYTIYSASCFVSIASFQVAYVIQRAEILSD  
ITHSFERSIILIVGSTIALNMIINFVSIIMAGSSRLLEFFRNSARFEALTGFLSARPFATNHLWSKFHRLVAVV  
LAISYAVGFHFFVSGLTELLPPQWILTGNILGVFVCALFHLYNSIPYMLRCCSSVLVEYMQAQFVQFEGCAQKLK  
ATKVAPMLHATEGYIQQLRYLHDTIDPKGMCISGGGGFFRLNKSLLVSMGTGSIITFTVILSQNSEDLAHKIDLYS

>IsGr21FIX

MQPKAPLSPVMLRNFAGFGMLCRLAGCFFIQSFSSKSVENAKVNWKNFYTIYSVTCLLSIVSFQVAYVIHRAEMISN  
ITHSFERSILLIVSSTVSLNMIINFVSIIVGGSYRLLQFLRNSARFEASTGFLSARPFASVATNHLWSKFHRLVVVA  
LLNSYAVGFHFLVSGLTVLLPPQWILTGNIFGAFVCALFHLYNSIPYMLRCCSSALVEYMRAQFVIFELCKGFQGA  
RSDAHSQVIETVRLNLGVIRELKESLNIWHWSLGATCSGIIIFMTCVVLFTLTFQDGVHREVWVSVSVFLVSWLSF  
VDMIYVSQALVDGAQKLKNATKVAPMLHAMECYIQQLRYLHDTIDPKGMCLSGGGFFRLKSLVLMTGTIITYTVI  
LSQNSDDLAKIDLYS

>IsGr22PSE

MSSTMVQRSALHAIFSRHGCFFIQNFHGKSLKNAKVTWKTPYTFYSFSWFAVYIFIEILFSIRFAYVIQNI  
DALSRLLLLVLSVAVVKLTTLNLAVMFTKPKLLAFFRKSEAFETNTGFSPRSYSLHSAADRWN  
AVRALAAFMGLVMYFS  
LAEFWIMVELIQTVPTQWSVPVGNIGFLHGNRFLSFYDSL  
SYFFLRNCTNVLIEYIQVTVEGFQ  
EANKWKHFHFQPD  
APLQIEAMRLRINKFGSSRDTEZHLGRTLIVACAGTVIIDCVVDAVFHDG  
IKKELWLGAGYFVYSSLCFIDLAYTG  
QALVNEVRKLKSAILMVP  
AFGAPDTYLQQLRYLHESVD  
PEGMSFGGGSFFVLKKS  
LVLSMIGSVIIFGVILVQTSNS  
VAFKINTT

>IsGr23PSE

MAGHSLATGQRTIAIHWPMGTGICDAWGCSFIHDFKRKSLNNAQVDWKTPYTFYSFSCFVIYLF  
LTTLFATRFAYVI  
KGISDALSRLLLLVIYSVIVVKITTILAVMFTKWNKLLACVRKSEAFKSNTSFFVXPHSAW  
HSAAZIWSVGRVLAVF  
VGLALYFAAAEWILMVELTSSMPPEWSDLVRLFDFFMGIGSMVYDPVLYLFLT  
TCTZVLEEYI  
HVQMKPFQEAXRED  
FNIHPQFLLQIEAMRLRIFKVRQLKESLNIWADTII  
VACAITXADCVVLD  
AVFHDGTRKELWIAV  
SCELYASLCFN  
DLAYTGQTLIDEXLPPTVVS  
RADYPYNQKV  
VYLHESVDAEKICLGGGGSFFL  
KKSLLPSMTGAIIFGVILVQTSN  
FQKLNIAA

>IsGr24

MVSVMVQRCVPYAILGRLQGCFIHNFRGKSLRNAKVTWKTPYTFYSISCYIFYILLET  
LFATHFARVIRN  
ISDALSRLLLLVFGVVVKVIANLSVMLTKPDELLVFFRKSEAFETTTGFSSCTRRS  
QDSAAVRWKVLRKCGVYMGQVLYFT  
LTERFIMVDIAQSMPPEWSVPTKIFAFFL  
GIGFLCYESLSYFFVRSCTEVLVEYI  
QIQVELFQKAGELSHVGFQPPF  
SSQVDAMRLRIDSIRKLKESLNNI  
WAGPLIVSCANTIIVDCVVVDAVFHD  
GIRTELWLWAGYSVYASLCFVDLAYTG

QAFIDEVRKLKSAILMVPTYGASDSYLRQLRYLHESVDPDEMCLGGGSFFVLKRSLLLSMTGSVIIIFGVILVQTSNT  
MSLRINAA

>IsGr25

MVSIMVKRSLPFAIVARLQGCFFIPNFGGNSLRNVKVTWKTPYTIFSISCFAYMFLEFLFAKQFSHVVANISDTLS  
RSLLLVVFVGVVVKLVNLSVMLTKSKKLLAFYRKSEAFETSTGFSLSLHSLRHSSAHRWNAVRACGVYMALALCFT  
NVERFILVDMAQSVPTESVLMKIFGVSLGFGFIFYESLSYFFLRSCIQVLGEYIQVQVELFQKDVQCSNVHLQPQF  
SSQVQAVRLHMSKIKELKELLNDIWAELIVTCANAIILDCVVLDVAVFHDGIRKELWLAIFYSLYAPLCIVDLAFTG  
QGLINEARKLQGVILMVPAPGAPESYLQQLRYLHESVDPDGMCLGGGGFFLLKRSLLLSMTGSIIIFGVILVQTSNT  
VTLKINAG

>IsGr26

MTSMMVQRSTPYAIFCRLCGCFFIHNFRGKSLRNAKVALKSRYTFYSFSWFLLYMFLEALFSKRFGYVIRNISDPLS  
RALMLVVLGVGLVKLITNLAVMILKPKDKLLAFFRESEAFEMTTEFLPQAHSLRNSAAYGWHAVRAFSVAVGLGLFFI  
EAERFIIIVELSQSLSPQWSVPLRVIGFVAGTGYVAYDSLSYFFLRNCTKVLVKYIQVQVELFQKVGKLNIFYFLAQ  
PHQVEAMRLRINKIKKLKESLNAIWAELIVACAGTIIIDCVVVDALVHDGIRKELWLAAGYSVYSTLCFIDLAYTG  
QTLIDEVRKLKSAILMVPAPGAPESCLQQLRYLHESVQPEGMCLGGGSFFVLKRSLLLSMTGSIIIFGVILIQTSTNT  
MTLKVNA

>IsGr27

MSSTMVQRVALYSLLCRLYGCCFFIQNFREKTLANAKATWKALYTLYSISCFVLWFVIEMLCFTNYTDVVRISDTLS  
KTLLLVAYGVVLVVKLIVNLAVMFTKPKDKMLTFFRKSEAFENNTGFTPTNSLLRSATDRWNMVRALAVFMGFALYLT  
GALWYVRTELLKSIPPLWFVPVILGTYMFIFGLLYDSVSHLFLRSCTNVLVQYIRAQAEVIKEAGKLTNFHLQSQS  
PLQMEAVRLRINKIRKLKESLNEIWAGPLIVHCASTLVVDCVILDVAVFHDGIRKELYIILICSLYTSIGFIDLAYIG  
QTLIDEARSLKNTILMLPAPGAPDSYIQQLRYLHESVDPEGMCLGGKGFFALKRSLLVAMTGSVIIIFGVILVQTSKS  
MALKINAA

>IsGr28

MRSMLLQRAAPYAILCRLHGCFFIHNFRGNSLRNAKVNWKTPYTIYSLSFGLYLILEEMYATRFTYVIRNISDTLS  
KYLLLVIIYGVVMVKIIANLTVMLAKPKDKLLAFFLKSEVFETNTGFSPTYSLQHSTFHRWNAVRRAIWVMAFVLF  
EAERFMIAELTRSMPPQKSVPLTIFGFIMGSGFMVYDSLSYFLRCCTKVLVEYIHVEVQGFQAEAGKLQNIPLHLS  
PREIEATRLRMNNIRKLKESFNEIWEGPLILACASTIMVNCVVLDAMFHDGMRKELWLAVAYSLSYSSLCFIDLAYTG  
QSLIDEVRKLKSAILMVPAPFAEAPDCYLTQLRYLHEVVDPEGMCLGGGGFFVLKRSLLVPMTGSIIIFGVILVQTSNT  
LALKNNAT

>IsGr29FIX

MSSTMVQRVALFSLCRLYGCCFFIQNFRGKSLADAKATLKSPYTLYSFSCFGLYFLLEAMFSTQYEGSVETISATLS  
KTLLLVAYGVVVVKLIVNLAVMFTKPKDKMLTFFRKSDAFERSTSFTPTYSWRRAKQRRSRVRARVFMVYALYLT  
VAEWYIMAEVLQSIIPRWSVPVILGIIMGIGFFVYDSVSHVFLRSCTHVLVQYIRVQAEFIKEAGKLTNFPLHPKS  
SLQMEAVRLRINKIRKLKDLLNDIWAGPLIVHCASTLLVDCVTLDAVFHDGIRKELWIIIVICSLYTSVGFIDLAYTG  
QTLIDEAHLKNTILMLPAPGAPDSYLQQLRYLYESVDPKEMCLGGGGFLALRRSLLVAMTGSVITFGVVLVQTSKS  
MARLVNAA

>IsGr30FIX

MSSTMVQRSALYAMLGRLHGCFFIHNFGKSLKNAKVTWKTRYTIYFSWFAVYIFIETLFSVRFARVIQSIDALS  
RSLLLLVLVCVAVKLMTNLAVMFTKPKDKLLAFFRNSEAFETNTGFSPRSYSLHSAADRWNARALAAFMGLVMYFS  
LAEWFIMVELIQTVPTQWSVPVVIFFGFTGTGFILYDSLSYFFLRNCTNVLIDYIQVQVEFFQONAGKWNFQLQPQS

PLQIEAMRLRINKIRKLKETLNNIWAGTLIVACAGTVIIDCVVVDVAVFHDGIKKELWIGAGYSVYSSLCFIDLAYTG  
QALVDEVRKLKSAILMVPTFGAPDTYLQQLRYLHESVDPEGMCFEGGGFFVLKKSLLVLSMIGSVIIFGVILVQTSNS  
LTLKINST

>IsGr31FIX

MSSTMVQRCALYAILGRLHGCFFINNFGKSLKNAKVTKWTPYTIYSFSWFAVYIFIEILFSIRFAYVIQNIISDALS  
RSLLLVVLVSVAVVKLTNNLAVMFTKPKLLAFFRKAFAFETNTGFSRYSLLHSAADRWNNAVRALAAFMLVLMYFS  
LAWEFVMVELMQTVPTQWSPVVGIFGFFTGTGFILYDSMAYYFLKNCTNVLIEYIQVQVELFQKAGRWNKFQFQPQS  
PLQIEAMRLRINKIRKLKETLNNIWAGTLIVACAGTVIIDCVIVDAVFDGIKKELWIGAGYSVYSTLCFIDLAYTG  
QALVDEVRKLKSAILMVPTFGAPDTYLQQLRHLHESVDPEGMFFDGGGFFVLKKSLLVLSMIGSVITFGVILVQTSNS  
LTLKINST

>IsGr32FIX

MVERSTIPAIVFRVFGCFFVPNFSGESLAQAKVTWKSFYTCYSLACFVVYIFAETAFAVIRSLDVLDRVSHSFSRSLM  
LTVHVIVTARITGNLVAMLTGQEKLEFFWNSESFEKNIGFLPHARSKRGKRSTRRWATMRMFLVVFVGMVLCYAAGV  
YYRIGQSAQSIGASWVLPVKIIGVCMAGLVVYDSLSYLLLRNSATVLAEYIRAQLEAFKECRRSSSINLQNKVSGQ  
IESIRLNMSKVKKLKESLNNIWNWPLMVASASLVIMNCIVFNGIFHDGFKQEIWLSITYALHASLCFIDLAFASQAL  
VDEARELNATLVVPTFETMEDLLHQLRFLHETIDPDAMCFSGGGFFSINNLLVSITGSIIVFTVILVQTSDTIDA  
DAA

>IsGr33

MSSYVEREFKFVARSCRLSGCLFVSNWSGRFAEFRPNFRSWYALYFGFLGVVTCGFEITLLHRRISYIYMREKDFS  
ELLFMIIHIVIGLNIATNTLVFILGTERLIDILRSTKRLEGAMGFEPARSSRVDDARKLFKMFLFAIFQAAFVLSRL  
ASSKEIFQEPSTALTIVITICFSLSCVGYAIHGTVVLNANMMFFYSVLSEYLPQVAIVETLSSQILARNPRYTAKIL  
ERTRLHFVSIRNIVRSVDRLFEGWLVVSFLTCAFTLCFTLYSLFDASTWSKMYIYIIYSVNSSANISELTHAAFRM  
KQQALHIKHVLEKTPLVNLPRRLVLQVEFFAENIEAEQLCVTGSGFFTVDKPVLTSPKEHRAAISVLLIGRSVDEI  
AA

>IsGr34

MTVIETRRFRSTRILRWAGAWFIEDATNPARQPLKTMLTRPYTWYCIFCFSILFCIELSLIFWTLLFSFGERKMFLN  
TLFVVLHITVVTKTLLSVVSLALSASKFKKLVNKAHFVSRNFKPLPQHKKRITKASLRIWQAILIVFVVRNT  
DMMLMVEISNIFLAIVLNVVMGAASVLLVIYDGMYSTVLKGLVEIYVAYLKKEVDILKKARTATGPQASSILEDCL  
DVNSVQTLIRYTNRIMKYAIVIAYGGNLIMLCGIAYCLVDPTSKWSLRIFCFYGVLIISLDMVDIGFLVESLKMQAS  
KMKWVLQSMNFLGLPDSFSKQVRFLHDCLESGQMDFSACGFFKVNLTLLISMGGAIITYTVILVQTSQGLSM

>IsGr35

MTFAYSQFRYSTRLLRWGGVWIVAEATNPGKQSFKTTLKRPYFWYCVLCLSTLVGTEFGNIIWALLFSFKHRKVVS  
GVYTATQITVLVKTMLSSLMVALAAGRLKKLVARANQFEIIRNIKIAPRSKKVTWRDIRIWGRVLFMVLFVSIRNMD  
NLSILDVENIFGLGALVVVMTASSMLLVIYDCLYSTVFKSLVEIFIEYLRYEIRVLKMKMELNSGSPMKMVEDCRI  
EFNTIQGFVKSTNQVMRYAFVMAYAGNLIMLCNIVYLLVDTAATPWALRIFSSTYGILMWIDMIDNGVVAEGIKASK  
MKWLLQSMFPQGLPDSFAKQVRFLHDIVDDSAMFTGAGFFRINLPQLVSMGSTIITYTVILVQTSQGLQA

>IsGr36INT

MSNLAEQFDAVAKFGHATGSLFITRTSDGTSPKYRTMFRSLYSLYAMFIVGGCVIYEIFLLHFKVSGNSSLTTFSTNT  
VFNTLLVIIAIRIAANVSIILSLSGKLADVLNHAEDFKASLPVKSGLQQRKNRSFIDLIRFLMFLSFAVFTLSRYLF  
FGELTSERPPSTATMATSAFVIVSTVVLTSACNFVHAIATLVYDLFTDDLGLVAVAKVRLSPGSMLWGPRTARVLE

DTRLKYLAMRKIIQELNDVLQYSTFVTVTCTLLTLCCTAYLISETESSWGKLVFTASYAVASSLELVHITVSMSQLK  
EQVQLFKESLDIQLFCASGLGFFTVDKPLLVSIFFSRLAYSLKVMQLCFDLLAIIKISALRRMFI

>IsGr37

MLLMKQQQSSLRTYECPDSFFAGIAVGAYVATIEPRRRMKDTRLNNTTIYILFLTSVNVEAVINNFLMFVKAPKFV  
ELLHLCAKIEMNIGTPPYVQHDTISFTWKIMAFQAVLSCCNFVLNIIISDFGTALVLSAEGQVSVDMVIGILYSILG  
VVYVSSLCLVTRLWMTYFSKAFTLYLSCIYRNLDQCLRSRSTPESRKVSLVDHTRVQLTLLKNCADLASSLLGPSLL  
YAYAYSVALLCAAAYYTIIPELSNKIRLFFLCFGLHWISILLPTVSAHRIKGAVIELRSIVQGVSMADFSDDLQAQ  
LRMMLNSIRHDDLKFTGCGFFVVDLSTFADIMGAVITYTVVLVQTNDSYLKGSLEHCLENSTII

>IsGr38CTE

MYFARARFAIDAGLLAVAGCSFPPLNDSLKGSFTTWREAYAVACICVAVALEAFAYVGKFTSNPALSSLFNNTLFFV  
IRIVNLVKVVALRFFLRAEARRVTELITQAEAYEESRNIRVRYRAPLFKTAYRCVSFVAVMSFFAARWHVYVKRLFS  
NSPLPLKAFLDFLTIVLSASCMTVWDGIHTILVRYFADVFLLEYLKAENVALTALTQRKVVGFGGRAMSTALRGIESNYE  
EILRMVATARSVLRSLVFFGFTCNAVIVCAVLYSYTDGTSTISLLLSGTLYAAYTIAETLDITFAAETLATE

>IsGr39CTE

MGNKMPAIYAGYRQFFVFCRIAGCCFVDGAFIRHGCSDLKIKIWSWYILYSLAGLWFFYFWAMAVLIGSESNRPIFD  
TPNMIFYGYNVLINIQA AISMLSLLRHSGTYLEIIKTCGDLEVAIGLPREQAQRKLEKISRRLIFMILDSARGLAI  
NKRVLPLSLRFMWSLHDWVKMGLLACFEVGVYLVGIWASLSFWLVVYNASVLKEYFACVNARMVQALTDPTGPAESL  
QVRVLNHAALRGMVLKINNAFDLQVTLYYGISIYFLCASLYGVLLFPLTYADRAIRAIFFVCLATSVYVSARAAHNM  
TSE

>IsGr40

MPAVREAYS AIYSGYRPFFLFCKLTGCCSIQGLWTKTLFDELKVKMTIWSALYSFLLLT CYVWTLVLVFEILVKQHF  
QHPSSPISTVKGLFYGYVLLYLQSTVNFTLVRHAGALLAIIRDCSSLETQIGLEKDRVRRRLIIVSRGCLGFMVL  
DCIKSLTLAYRVVPAAWLHLSWMHDWVKIVCVAFFLIGVMLVGLWFSMSFWMIVYNAYVLRHYFARVNELLVEGLSM  
GGDCGRALQVRVWYQAEIRDIVSRFNSVLGLQSTFYGGSVYFMCATVFGAFLSNISVLVRIVRSVFVITMAIGLLV  
SARAGQKMTSERHLKKGEVPRCLFAFLRVKKVTWFLHLLLVTSEAGEKAFTGCGLFKVNL SMLVAISGAVITYTVVL  
VQTD EEA VRQCV

>IsGr41JI

MDGRVPAAYPGYRFFLAVARISGCCFIDGVLFKTGPWMLRPNFRLLSLVHFAFCVFLSLWPPASFVMVRAQSRKTL S  
QIHSITGYGFYAAIYGQALVNILNMAFKRSDLVDVVRMASQLERRLQVPPKAVERRLRQVSLMCF AFVLFDGFKYML  
GLRTVMLLAFSLLDESHVVFRVAFIPGFL LGCVLVTWYNLSFWMIVYFSEMVRQYFAALNDSLELALSTSKESFEA  
AERIRTNLVALRKLLKKINSIIIGVQALSYYAGSVFFLCATLYRILISEGALTD RVSRLTYLATMSAGIVISTRASHL  
MSQELHMLVLAAEDAQGCLTGCGMFVINLPLIVVVVGAVITYTIVLVQTS DSAMNIKCLHGGITP

>IsGr42CTE

MIKRRRNSSIYNEVIRFPSFKDGFQTLSTFHRCLGYSFFTQWERQGITQVIVSVWRPYLLYALCSWTF FVVM LQDT  
YHVLFLAAEDNGDALKVIDKCILIFYFVRCIGIQIANSITVLLRSGRLREVVALDTLET SFNRDTHLRVAKIILS  
LNVLF SVTALVSILDEISGFDGYMEPLHMKITYSVFSLLFAETVCM LCYTWAMFFGKVFEAFIRCINEDIESLATLK  
QVRQLELDVLHNRFCDL SNAFGECNAILNTSLAVSVPLNILNASPWGYFILSTDGDAFHVFTDVLGFGTMCAELLVL  
CVYGSAAQ TQ

>IsGr43CTE

MRVLRPRVLAVSPSSAMLASPFKIQPSYPSGKSLLSGFSVIAYFHRLLGFCFISKDANGRPVSKIIGPYMIYAFIS  
WALYLFVIGSDIVRVSILLQDIRNRAIDKAIQILACVRCIGIEIATIVLLVTKSSQLVELLVTLEELEERLNRATSL  
RATAIRVVILNVIFSVTSVLSISAEIYGFDEYSAEAYMKILYGVFSLVFAENVCMISFSWLMFFCRVFGVYLSHVNE  
DIDCMSNELVVSIPELAEHLRFLVNVGWAFARLEQLLGVAILVSFPLNIVSAAPWGYMLKADKGTTFMMLDLIGFF  
TICAEMLATGVYARATNRE

>IsGr44CTE

MFTESIMSPTSSTKTFHAAFHQVNRLHRTFGYSFISRSFSPSGEHITCNRLGPYTVYFVLWSMSTVGVFVYDAIEAL  
AVYEDDEVLDKATTLLYSVRTISIQLCMTVAAVITAPKIRKVAEELGELEARLQRPTSLTRVSRNVLAANAIYSVVS  
FVALMPLMFQFRELSKNQLYWNIVYIGVNLFYGQTSVMITYSWSMFFSKVFAELIRSINQELREMCSPSYSRESRDV  
GDVHALFYGVIEAFEQCNSTFGISLVVLFSLNMLMAAPWGYWLIRNVGKPEVVSVNFLGFMVLCQAQMAFVAIYSFYF  
STE

>IsGr45CTE

MLSAPSKTRYGEHRPSIASVLIREEWNKAPEAHVIERFLKMTRLLGCGFIEGLFTDNASTLRPQRASWYLVYTLTC  
IGFIFACAVHGVRTNISRGTMGDGIYLAVCVFYLLQALATFLTMFMYAPQLVEIVTMCIEFEVRRPLALDQRRCLNH  
FFMAVVVWLTLDVVKNFLRMALVALSPSVYEFFLNATIVSGVLLMLSSTIPQVGVVMSRWLTVFLCETQNMVLR  
CGELTGHFPLTVVTNYSR

>IsGr46FC

MLRRFLRMTRLAGCCFVEGLFASTEAGPKLTARRAVAVPPVLFVWPGVSWYHSFKSVLRNSSKATLDGDIYVALSAS  
FFLATNATAISMVLHAPKLVELIHMCDAFELKRPLRQRRKLNRLCTWIVLLLCAFTLHQNAFRLQRLVTTATALHFV  
RRLFTLLGVLFQLAWTHISPAGVFLMSRVLNAYAEAAHALELIGE

>IsGr47

MLDQWHLAVPKNEGVEPTLFRVPDLGLDSSRSRNPRKVFLQDTRPSVWRARELMI PGVLMCAVAMPGPFFQFMNPRF  
KLIMRMYQGLLYVGFTAYEAYRLIEFVEEFMKDEKTSLICFFHSLINTFLFPFVYIYVARKSESLGPLLSRWEDGHG  
HLKFIPERNVLKPKFLVNVYMALTVFLIVLFHFSVNAARSCYEIAWNYSNRTFPVKAVIFMGKTAHHYVLQTMYSGLE  
SLAFSLMFLWLWLLYNDFSCEVKTAPTLTIKTITAIREKYRSLCIVTEATANFLNSLLFLFFFRTSFDFMSSVIYYSM  
QDGRAMKLWILVYEGILTFINVFHNTALAEMSSLLSLQAKDTLYEVSKVPAEPQAYKDLLLFLEVYRKRPEAMAGCG  
VLQVDRALVLKLCGSTVTIVLILFQLDPNLSHKVSL

>IsGr48

MQRNIIVTSKTPVMPFNAKAWAFKPESEHDTKKKTDDDRGTTWDYIKMTLMYIYATHIVSNAIAGSIRTGSMYLIIE  
TMTYTVRSVSVSTVTTTTYCFVKRGEINEIAQELQTFEGPEPTELLQKASRKRKYLRFSILCYSCLLIAMTSLFFVLVP  
AQKYFDKCFYGINLEKAGIPNAPAIMIGLIEWNSYNIIVTGSPLLPWYMYLCDHLRAQMLYFRVSQRGILDGGLN  
LAKFKRIQFMCAKMIDVERRLDNLFAPVLFLWIVDLLVNIVLPPIRTLVNGIASFTLANVMSFFIEVIYSVSFFMILS  
FSLAQVDKEYRDLDEEMYRVRNSVPGEDWQLCQQVHMETGIKSSRFTLTGWGLFEVDRSFILTIVGAVATYTVVLI  
QLTPGEETY

>IsGr49

MITSEKQIQQKAQQKMFRNLYMQVLETGSKGLLDKIGILKWPLLLVAYAYTVHTTINVFLTFMRIHNMKVLDIAG  
YAARSFFACLNLQAFQISTPSNRLLQRLSFGENQRRCFEVSTFLKVFLVYFVVEVSLSIDFVLNGDIGEYVTSFL  
YGTNISTTNMTQEVIIKAATFFNLTLFDILSIVPGLLMADYIAACLRLRLLASFRITVMDGRVKKTVTCTEVKRYQD  
LSYDAWRELKRIDDIYTTVVFLWYLDIIINLVLSMRNLSKGISSRQFALDSAYYIVIFVTLSLSASSVDTEAKDLMQ  
EVKQLRSNIDEDDWQTGGQILLLETGLQSSRIVLNSGHFCVIDRPFILGVVGAIATYITILVVQLTPPG

>IsGr50

MKVSSSFQSSARSRWAVKRLVWTVERSRNAKNQDVAIDVQVSQLANVGPFRLFALKKALLLPTLWLLLCYGLHLAA  
TIGSAGSTLTSFAYLLAVGNLIRAFTSIVSIVHIITFRNDILNLTISIENIFHDSLSEFVSRTRRFSNLCAFCFGS  
CLFHGTLICVSSLSGPWRDFYQARFYGVNCSRLPSAVRVIPILLDAPLLSITSSVTAMMACLFITVCYMLSLVTLHF  
SHTMNLMLSLSASGKLTTPGRVKDALLRFLFTGDAVCKLNMTYGPIMFWWYVDLLRSFLFSIPALLVAVTTSKEFFHY  
SFVVVDLTRDVIVFLLMSLVASDMARHIEESVVHSLKVADSMDDVRSVRLAVNVEMLVNAVQETKVQLSGREFFHV  
DRSLINRVLSIVATFAIIVFQFLS

>IsGr51

MNSAQRSQTKKGPPQIDRSDVLRMFRGLFAMMKLVGLLPRDLPEVIEAEVDARSIARRMRRAGVLLFIVFGYLIHFS  
AATVYNVTHDGGFFGFANCGYVLRNIFAALSLVHFLVFQRVLLRIVVDGFRIFEHPPLSIERKVRRATVLAACFV  
STFVALQNTTVWVGFDVQKYFNYYLYKGDVTQGTIPRQLGYLFSFIDATTYAIMESTLNCIITFHACVSLYLGCLC  
ENFVRIIREVSQQTSVSGGQVKALRRLMTRLSDVMVRFDRVGSPVFCWYANIVGSLILSTPGILLGMRAAPSDYA  
YMLTDLLTMLVILVALTFALADPTSLRSSYVHALKISTKVDIDDEEVNNSAHVLMDSIISTKVAVTGCKCFQVTRD  
MVLSILTMTSTYIIVVYQYIEHAM

>IsGr52

MNWAQYNLIKSGSSEIGRNDVLHMFRAMLVMMKLLGVLPRDLEGDIGHEIDARSIAKSMRRAGVLLFIVFGYLIHFS  
AATIYNVTHDGGFFGFANCGYVLRNIFALCLIHFLVFQRVLLRIVVDGFHIFEEPPRGIERRIRATVLAVCFDV  
VSYLAIVNASSYCGYKDVQKYFNFYLYKGDVSNGTIHKQLGYVLSTLDATAYATIMSVIYWFISFHACVSLYLGCLC  
ENFAEIVRKVSRQSSVSGGQVKSLRRLTTRLSDILVRFDRVGHFVFCWYLNIVSTLILSAPGILLGMRKASPYDYG  
YMLTDLITMLIVFVGVNVALADPARVFRSSFVHALKISTKVDINNEEVNNSAHVLIVSINSKVAATGCKCFQVTRG  
MVLAILSMVSTYIIVVYQFIENAL

>IsGr53

MEKSTPDRFRRVIRVSAAASRAFESNREHLQEDKNWLEMLFKELLVALKIHGIVIFKPDPSVAPRKGNAKSLLRNV  
RPSVILLVVFTSYGIHYAASSFTSLGRNPNGLLSLFSDVAYLFRIATALFTAFYMTSVSTSVSSLLSDSTTIFQKTL  
PQNAIKSIRGYVIGMSVFAFANLLAFLGVKVTELYQSGFDGYNNYLDLAPKSKSVIYYAVPALDIAFCTIIITMP  
KWIMGFHVSVCYKLGCAVSLSGTFASERVVLKRAREFREYHSALCELI FRFDEIFNLVLFVWYADIIISFVLSVP  
YIIIRTDNSTPWTYAFVMVDVACNVALLVFNMAASDPGLRADAQLVVLKMSSRADPDDVRLNHELLLLANAVKVA  
KVEMSGWNCFDVQRGLTITVLSMLSTYVVIVYQMMHHTL

>IsGr54

MPSSPVVSPETASKSVTMLEKCTRAAEEGTSITVPLKDV LKALRVFGIGPLTPRKLESRIKQGPSQDLTTHQIRYNQ  
LAWVIMHIWIVRLLRLRGVFLGKGKVGEEAPELLRGLASSVSLNRIILYRRRVCHFFWSVDHVTDRSLSYGKLSSF  
TSVYTGIGWLYILVRLILDVANLFTTVGFKGYEQWLLVDTI PGSLTFAYYIIAVPDTVIRRLILSGPTIFMISFYS  
QLMWVIVSQFNSFHCTLKRKCTGSRNFGSDRLRQLRIRHADLCLLVQDVDDIMSPLAFLWHAMMVLGACAEATHLLQ  
LKISEDAWAIVHISLDLAYMLVFFGIVSFSSAAVCQAYNATLNYVNLMSARMSQVDDAEFARQALLMSQMQSISVS  
VTAWKFYDMNRAALITTLGAVVTYVVVVVFQMAPKLLQGPSE

>IsGr55

MKVGVRSFSTMIIFAPPRSKLLSQLEMLFKPLIYSFGSFGPPGVSVSLRSRLTAYTTTLVVLTTTLTCHLALLIMSL  
SRGFEHASIRRGCTCVRLACSLIIVVLLIRRSHEVIAFKSRLLSLYSHLPVLDPSSVRLGKAKLVVWCTAAFYVLQI  
SYATFQGFLPDTNEESMAAYFKELWFGLDNKHFPPLLTRCLWNLESFVFHVTTEAVVRVPVLFYVAACFLLKARLRD  
FRLMLGRQRWKQSMTTLTTLTVKELRDLQRLHGILTEAAQQLLEDVFSPIIFCSYTTFFVHHIIASLYNIFDRNLLYFS  
GAPGKIHLIRQVEVYLEFGLTVWFFLLLTVAAAFVNDEPSRLLPVVEKMILDVDELSVSSSFRAAFLLARFSRPAQ  
LTAWRVCVISRGLVLTVMGAFLTYGVIFQFVHLGNSAAK

>IsGr56

MKKKPISKVFVPRSRNSESDAIFKIPMAALKFTGLFWNTTCRPARLLSFLLKISIVTTQAKLLSDAFTYETVDMVLY  
GSRILTANVSFIIIFALQERNLRNAIKDLSDKASFLLPLQQRKIRTLSCSLACVSAIIIAVFLSGPAYVLFFTDKRL  
QTDLLSRFVAYLNEVCFAVVIWYPLCFMPILFVNVSQTFAELLSQYNEMIPKLFCTENHNIYSLNCKFRHSREQRHE  
MRRLLSVCGKIFAPCLFIWYGPTFLGCCAELSNFMRQSDAWVHRYKAVTSAHGWMFVGVSAAHHVYATGRASWD  
VLQDCTLRLPLDVGVMELVMLKEDCRKIAMAFTIGGFYKLTLRTAFSVFSCLTYAFVWYQIGPGSQPNVASHTNS  
D

>IsGr57PSE

MKKKPPIPKLFVPRSRNKESNAIFKIPLVALKFTSFFWNTTSRSARLLSFVLKISIDVTQTKLLSDEFAZQTVNLVLY  
GSRILTANVSFIIIFALQERSLRKVLKGLSDKAGCLLPLQKQZNIQMLNCTLACLSAIIIGVFLSGPAYIIFXTEKZL  
QKDLLSHFVAYLNEVCFALVIZYPLRFMTTLFVTVSQTFAELLSQYNEMIPKRLCTEDYYIYSLDXKFTNSRKQRHR  
MCHLLDVRVKIFASCLFIWYGPTLLGCCAELGTfMRQSDSWVQRYKAVTSARGWAI FWXVSLVANPVYATRQVSWG  
ILQDCTLTLSDVDVVHMLVMLKEDSREILKAFTIGGFYMLTLIPAFSVFSCLTZVFVWYQIGPGSQRSAAIYTSS  
G

>IsGr58PSE

SFLLKVSIDVTQAKLLSDAFTZQTVNLVLYGXRIILTANVLFIIISAXQXRSLRKVLKDLSDKAGCLLPLQKQZEIQTL  
NCTLAGLSRIIIGAFLSGPAYILFFTDKLLQTDLLSHFVAYFNEVCFALVIWYTLCFMPIMFVTVSZTSARLLSQYS  
EMILKRFXTEDYDICSLDCKFTDTTKQRHKMCRLDDCKIFAPCFFVWYGPTFLGCCAELSTFMRQSDSWMQRYK  
AVTSAHGXLAMLANPVYATRVSWGILQECTLRSLSDVVHMLVILKEDSRDIVMAFTIGRFYELTLKTAFSVLSC  
MLTZA FVWYQIGPRSQRSAAIYTNSG

>IsGr59NC

SVFFTEANPKHSDRTLLFFVALIWLNTLFVYGTLVFVPILFISFCLVLARAFKVHNVVIRNVHKSGLSLEADSLAQ  
VRIFYERICTLVTDLNEIFGPVIFSWYIMIVLSVCIDMTQLFSDTNLLKNTKEDEGFLFSLRGIYSLLSFLGTCLAA  
SRVSEEALAPLPHLHELTLRSWRLDMDTKMEAHFFLSRLSSSPVSMTGWNFFTINRSFILSVCAALTTYVVII IQMN  
PKAMKTINKLVTTALNNTGNGTASSE

>IsGr60NC

AGSSTELTKFIMVRQTVPKHHTKTIIDVTYVQVKHFRSLVRVCAKNSDVQAGPVKRLHSIYTSLWNAVQKLDSQLSL  
AVFLWYVDLVNIIISVRMVQHTLSQFNPYSAAGAYVQALYLGLMFLMSYAAANLIVEVRHVDHDVCQLVCALTAV  
DGQTCNQVMLLQEEVANCRMAFTGWNCFNIDRSFILTIVIGAIITYAVVLQQLT

>IsGr61

MYTSRRTTKLFVIRHVDEKVDPENNRVTFKQLRPILWSLKLLGFYSPLYEDAERPVRPWYHDVSTWTCVTLGLLHAY  
ALASLTACIEGDFWATAYNFFRAGSAVVSSQAVISKGPQACALIHRLGTFSSRPGHNLKKTCTVMVLVVLGYVILRI  
AVHSMVLLDYNADLSKHAKIAWFGIESQLPASVLLPLCLVDVVLNSILVTGSLLSVALYLALTVALRHRHYEAFND  
AINRHVRDNNVRQEETQDQSWTTTRENRLDVLHELRELRIQTDLGVAVLEMETHFSPTAFWVSFFVLGVCAEVSR  
FLGHHEGLSDEHRILVIGLNLGSVTLLFVLLAVMSSRLSETSNASMMPLHRLGLSSDRPQEYHEGLLLISQLRAP  
AVVLTGWGFFYFSRGFVLTLAGALLSYVIIILQLNSDLKEKEIGKDG

>IsGr62CTE

MSSRIFTVEPRSCDDDPDTPDFRIILTSLNLLGVFSLGPSSGGTIFRRCVIAYRSVATFYIHYVAFAHLYSLCSGV  
RGWTDIITSFIACSSVFTLDSLRLRRERMECLLSMRTCl aEGSVKARWAVLRKSRVCTVCIWYTLAAFI VNSICS V

TLSPQSSWDSYLLGANASRVSEKAKAVALVATTLRLLVDGPWFFVMALFVLSCWVLRASFRDLEEKVTEDMSAE  
DVSRLKERYCQLTAVVNELDDNLSPSLFVWYVAVLVALCSRFSIAIVTRTSHEVQIFWWLTHLLGLLWTLAILFGVS

## Supplementary Methods

### **Selection of *Ixodes scapularis* Wikel strain for genome sequencing**

The *Ixodes scapularis* Wikel strain, established by Dr. S. Wikel (Quinnipiac University, Hamden, CT) was selected for genome sequencing. This colony was established in 1996 using approximately 30 pairs of field collected adult male and female ticks from New York, Oklahoma and a Lyme disease endemic area of Connecticut. At time of sequencing, the Wikel strain had been continuously in-bred from brother-sister crosses for twelve generations. Ticks derived from this colony have been found competent for transmission of *Borrelia burgdorferi* (strains B31 and 297) and *Babesia microti* isolates.

### **Genome Size**

Prior to sequencing, flow cytometry was performed on propidium iodide-stained nuclei prepared from synganglia cells and used to estimate the haploid nuclear genome size of *I. scapularis* Wikel strain ticks as approximately 2.31 Gbp<sup>1</sup>.

### **Construction of Genomic Libraries**

#### **Construction of Small, Medium and Large Insert Genomic Libraries**

Total DNA was extracted from a single batch of *I. scapularis* Wikel strain embryos using Qiagen Genomic Tips GS-100 (Qiagen, Piscataway, NJ) according to manufacturer instructions. Embryos were surface sterilized in 10% bleach solution for 10 minutes prior to DNA extraction. Genomic DNA was used to construct small (~ 4 kb) and medium (10-12 kb) insert genomic, and large (40 kb) insert fosmid libraries at the J. Craig Venter Institute (JCVI) and The Broad Institute of Harvard/MIT.

#### **Construction of a Bacterial Artificial Chromosome (BAC) clone library**

An *I. scapularis* 10X BAC clone library with an average insert size of ~120 Mbp was produced by the Clemson University Genomics Institute (CUGI). The library comprised 184,320 independent clones which were arrayed to nylon filters. <sup>32</sup>P-labeled *I. scapularis* genomic DNA was hybridized to the filters and used to identify clones with a high repeat content using published procedures<sup>2</sup>. Forty-five clones that failed to demonstrate a strong hybridization signal were selected for complete BAC sequencing and assembly (Supplementary Table 4).

### **Genome Sequencing and Assembly**

#### ***Ixodes scapularis* Nuclear Genome**

The genome of *I. scapularis* Wikel strain was sequenced in a joint effort by the Broad Institute and the JCVI and funded by the National Institute of Allergy and Infectious Diseases, National Institutes of Health (NIAID/NIH). Sequence data were generated by Sanger shotgun sequencing of the genomic libraries described above. Sequence reads were assembled with the Celera Assembler (CA) software, which is available as open-source (<http://wgs-assembler.sf.net>). The original version of the CA software<sup>3</sup> had been modified to assemble at low sequence identity<sup>4</sup>, to report high quality SNPs and longer variants<sup>5,6</sup>, and to trim reads based on partial overlaps to other

reads<sup>7</sup>. Running on Sanger data only, the *I. scapularis* assemblies did not use the CABOG unitig module developed for 454 pyrosequencing data<sup>7</sup>. An initial assembly was generated with CA version 3.1 before the completion of sequencing. Subsequent assemblies used CA version 4.0. The final assembly incorporated parameter settings and process modifications chosen to increase assembly contiguity on this data. The final assembly, labeled Assembly D in Supplementary Table 1, was deposited in GenBank as JCVI\_ISG\_i3\_1.0 and has the VectorBase designation IscaW1.

**Analysis of reads.** K-mer analysis indicated high polymorphism in these data, where K-mer is defined as K consecutive basecalls in a read. For a read of length N,  $M=N-K+1$  is the precise number of K-mer instances and an upper bound on the number of distinct K-mer sequences. Each distinct K-mer sequence has some frequency F across all the reads. Distinct K-mers with  $F=1$  are single-copy. Single-copy K-mers may be induced by sequencing error, low coverage across polymorphic loci, or low coverage in general. Single-copy K-mers are useless as alignment seeds. Celera Assembler uses K-mer matches to seed sequence alignments and thus to detect pair-wise read overlaps. At  $K=22$ , CA's default, 50% of *Ixodes*' distinct K-mers are single-copy and single-copy K-mers cover 12% of the data. Smaller values of K were required for sensitive overlap detection, especially in polymorphic regions of the genome. At  $K=16$ , the single-copy K-mers make up 25% of distinct K-mers and cover 2.6% of the data.

K-mer analysis also indicated high repetitiveness in these data. An F value of 50 was considered high frequency for a K-mer in these data. At  $K=16$ , just 1.8% of the distinct K-mers displayed high frequency in the reads, but these K-mers covered 56% of the data. This indicated that larger values of K would be required for specific overlap detection, especially in repetitive regions of the genome. Obviously, there were compelling and competing demands on the assembly parameter, K.

**Trimming of reads.** Reads were trimmed using CA's overlap-based trimming (OBT). The initial assembly used CA defaults. The trimming was based on each read's partial overlaps (local alignments) to other reads, where overlaps were discovered with the K-mer seed size  $K=22$  using K-mers whose frequency in reads was greater than 1 and less than the frequency of the top 1% of most frequent K-mers. The software trimmed reads that (a) had a span confirmed by overlaps and (b) had some position at which overlaps consistently broke off. Analysis of the initial assembly uncovered anecdotal evidence of insufficient trimming. In an effort to improve trimming of this data, the later assemblies incorporated pipeline modifications designed to uncover additional partial overlap evidence. Assembly B was run with parameter changes that specified small seeds ( $K=16$ ) and a low frequency threshold for seeds ( $\text{freq} \leq 50$ ) at the default minimum overlap ( $\text{length} \geq 40$ ). These parameters were chosen for high sensitivity among non-repetitive or polymorphic sequence. Assemblies C and D also incorporated large seeds ( $K=28$ ) and high frequency threshold ( $\text{frequency} \leq 8000$ ) with a large minimum overlap ( $\text{length} > 300$ ). These parameters were chosen for high specificity among repetitive sequences. Thus the OBT stage of assemblies C and D used the union of overlaps computed under two regimes. Celera Assembler's chimera detection option was disabled during assemblies C and D because the ratio of partial overlaps per read seemed to induce over-calling of chimera.

**Overlaps and unitigs.** Celera Assembler computed full overlaps between reads that shared a K-mer subsequence. Without changing the reads, the CA optionally corrected the observed error rate per overlap for all reads whose overlap collection

indicated a correctable basecall error. It then filtered the overlaps by error rate and used the surviving overlaps to construct unitigs, or high-confidence contigs.

Assemblies A and B used default settings, including 22-mer seeds, an alignment error threshold of 6% before correction, and 3% threshold after correction. Assemblies C and D used more permissive parameters: small K-mer seeds ( $K=14$ ), a high frequency threshold for K-mers to use as seeds ( $\text{frequency} \leq 8000$ ), and high tolerance for alignment error ( $\text{mismatch} \leq 20\%$ ). In assemblies C and D, 99.98% of the distinct K-mers were used as seeds, and the seeds covered 90% of the sequence data. The resulting overlap collection included 55 billion overlaps. In assemblies C and D, the correction option was disabled to avoid using high-error overlaps for correction. The unitig module was tested with several values of the overlap error rate filter and finally run with a permissive value ( $\text{mismatch} \leq 13\%$ ).

**Contigs and scaffolds.** Celera Assembler built contigs and scaffolds from unitigs and the mate pairs that unitigs incorporated. Unitigs were evaluated by the A-stat statistic that compares observed to expected coverage<sup>3</sup>. Unitigs with high coverage, presumed collapsed repeats, were precluded from nucleating contigs but reserved for possible incorporation into multiple scaffolds later. For assembly D, the genome size was set explicitly (size = 1 Gbp) to a smaller-than-expected value, effectively increasing the expected coverage. The goal was to incorporate more unitigs early in the scaffold building process. Assemblies A, B, and C had used the default behavior in which genome size is estimated from the unitigs at run time.

Assemblies A and B used default settings that allowed up to 6% error when merging unitigs into a contig, and up to 6% when recovering trimmed sequence from reads at contig ends to close a gap. Sequence analysis of contig ends in initial scaffolds indicated that polymorphism was preventing well-supported merges. In assemblies C and D, the error tolerance was increased to 20%. The CA consensus module failed on seven contigs, possibly due to accumulation of pair-wise error in the multiple sequence alignment. These seven alignments were inspected visually and adjusted slightly so as to permit continuation of the CA computation.

Supplementary Table 1 captures the effects of our assembly interventions. Adding  $1/3^{\text{rd}}$  more reads after assembly A increased the sizes of the maximal scaffold and contig, but had little effect on total span or  $N_{50}$  values (compare columns A and B). Adjusting K and other overlap parameters greatly increased maximum, mean, and  $N_{50}$  values (compare columns B and C). The drop in total span of scaffolds and contigs was partly due to combinations of previously separate contigs. The result of adjusting the genome size parameter was to increase the mean and  $N_{50}$  for values for scaffolds while slightly decreasing them for contigs (compare columns C and D). Each successive assembly incorporated more reads into contigs. Assembly D incorporated 44% of input reads in contigs. Assembly D left 2.2M reads (13% of input) in unincorporated unitigs called “degenerates” and 7 M unassembled reads (42% of input) called “singletons.” Of the 15.6 M reads that had a mate constraint after trimming, assembly D scaffolds satisfied the constraint for 3.8 M reads (24%).

The size and distribution of DNA on the IscaW1 scaffolds is shown in Supplementary Table 2. The longest scaffolds range from 1-4 Mb and comprise approximately 3.6% of the genome. Approximately 48.9% of the genome is represented by scaffolds ranging from 10-100 Kb and scaffolds of 10 Kb or less comprise approximately 23.6% of the genome.

### **Sequencing, Assembly and Analysis of *Ixodes scapularis* BAC Clones**

Forty-five BAC clones selected from the *I. scapularis* 10X BAC library were shotgun sequenced and assembled (Supplementary Table 4). BAC sequence accession ranges are: AC192414-AC192429, AC192742- AC192744, AC200531, and AC205630-AC205654. More than 185,000 BAC clones were end-sequenced and trace reads are available at VectorBase (<https://www.vectorbase.org/>).

The assembled BACs were aligned to the *I. scapularis* IscaW1 annotated scaffolds using Mummer (Supplementary Table 4; Supplementary Fig. 4). Of the 45 BACs, only 12 align to a single IscaW1 scaffold, six align with between two to four IscaW1 scaffolds, and the remaining BACs align to ten to more scaffolds. Analyses of BACs with multiple hits to IscaW1 scaffolds failed to identify any potential coding sequence. Repeat-rich regions were identified in assembled BACs utilizing an in-house repeat library built using RepeatScout. Of the 45 sequenced BACs, 21 are composed of low complexity regions and do not contain gene structure suitable for annotation (data not shown). Pfam genome alignments show that repeat associated domains are common and include extensin like, formin, reverse transcriptase, integrase, endo-exonuclease phosphatase, Pao, and PF00075, an RNase H domain for an enzyme involved in retroviral replication, that is often found in association with reverse transcriptase domains (data not shown). The most prevalent retroelement had the following arrangement of domains: PF03372 (Endo-Exonuclease phosphatase)-PF00078 (Reverse transcriptase)-PF00665 (integrase). Some element regions were found that lacked the PF03372 Endo-Exonuclease phosphatase domain, and less often the Integrase domain. To determine gene content in the BACs, homology searches were performed using protein databases (NR Genbank non-redundant database, Pfam domains, and annotated *I. scapularis* IscaW1 peptides), and *I. scapularis* EST data (Supplementary Table 5). The remaining 24 BACs contain various amounts of coding sequence.

### ***Ixodes scapularis* Mitochondrial Genome**

The mitochondrial (mt) genome of *I. scapularis* was assembled from trace sequence. The genome assembly and manual annotations are available at VectorBase (<https://www.vectorbase.org/>). Phylogenetic analyses were performed to compare the *I. scapularis* mt genome to that of published mt genomes from other species of Ixodida and other arthropods. Supplementary Fig. 10 shows the organization of the mitochondrial genome of *I. scapularis* and comparison of mitochondrial gene arrangement between *I. scapularis* and other ticks and arthropods.

### ***Rickettsia* Endosymbiont of *Ixodes scapularis***

Analysis of *I. scapularis* trace reads revealed a substantial amount of reads comprised of bacterial DNA. Extraction of 16S rDNA sequences and subsequent comparative analysis with other bacterial species suggested that one organism with close affinity to members of the genus *Rickettsia* (Alphaproteobacteria: Rickettsiales) was simultaneously sequenced with *I. scapularis*. This organism was named *Rickettsia* Endosymbiont of *Ixodes scapularis* (REIS). The genome of REIS was assembled and annotated as a separate effort<sup>8</sup>. Briefly, ten previously sequenced *Rickettsia* genomes were used to recruit REIS reads from the *I. scapularis* read set, with subsequent

scaffold recruitment and assembly yielding 109 contigs linked into one chromosome spanning 1.82 Mb. In addition, four rickettsial plasmids (pREIS1-4) were obtained. The annotated genome is available at GenBank ([ACLC01000000](https://www.ncbi.nlm.nih.gov/GenBank/ACLC01000000)) and PATRIC<sup>8</sup>. A rickettsial isolate cultured from *I. scapularis* ovaries was recently named as *Rickettsia buchneri* sp. and may be identical to REIS<sup>9</sup>.

Among sequenced *Rickettsia* genomes, REIS is the largest to date (>2Mb) and contains 2,309 genes across the chromosome and four plasmids<sup>10</sup>. The 109 gaps in the assembly reflect the extremely high repeat nature caused by an extraordinary proliferation of mobile genetic elements (MGEs), which are dominated by >650 transposases (TNPs). TNP-mediated recombination events have resulted in dozens of pseudogenes, and also contribute to limited synteny with other *Rickettsia* genomes. An integrative conjugative element named RAGE (Rickettsiales amplified genetic element) is present on both the REIS chromosome and plasmids, encoding F-like type IV secretion system genes and many genes characteristic of the intracellular mobilome. The abundance of TNPs relative to genome size, together with the RAGEs and other MGEs that encompass ~35% of the genome, place REIS among the most repetitive bacterial genomes sequenced to date. Despite the proliferation of MGEs in the REIS genome, a typical core rickettsial genome was obtained, characteristic of reductive genome evolution as a consequence of an obligate intracellular lifestyle dependent on the utilization of host metabolites. Robust phylogeny estimation places REIS ancestral to the spotted fever group rickettsiae, containing the agent of Rocky Mountain Spotted Fever, among other pathogens.

### **Ixodes scapularis Genome Annotation**

The annotation of the *I. scapularis* genome was performed via a joint effort between the JCVI and VectorBase. The genome annotation release IscaW1.2 is available at VectorBase and GenBank (accession ID: ABB010000000). A total of 18,385 scaffolds (17,365 >10kbp and 1,020 <10kbp; ~5% of the assembled scaffolds) were annotated, containing 20,486 protein-coding genes, and 4,439 non-coding RNA genes. Supplementary Fig. 5 shows that the majority of *I. scapularis* expressed sequence tags (ESTs) map to scaffolds of 10 Kb or greater in length, thus providing justification for this approach. *Ixodes scapularis* gene, intron, and exon statistics are shown in Supplementary Figs. 1-3 and Supplementary Table 3 in comparison to those for multiple sequenced invertebrates.

The JCVI and VectorBase annotation pipelines utilize complementary approaches; the former focuses on *ab initio* gene predictions, while the latter utilizes primarily similarity-based methods. Both pipelines were run independently and the resulting outputs were merged by JCVI into a single consensus gene set. Several iterations of merging and manual review were performed. Updates to the gene set are performed on a regular basis at VectorBase.

### **Repeat Identification**

The *I. scapularis* genome sequence was masked for repeat sequence prior to annotation. Publicly available repeat sequences were obtained from GenBank and *de novo* repeat identification was performed by JCVI using RepeatScout<sup>11</sup> and by VectorBase using RECON<sup>12</sup>. Repeat sequences were merged into a single library that serves as input to RepeatMasker<sup>13</sup> to mask the genome (data not shown).

## J. Craig Venter Institute Gene Prediction Pipeline

An initial set of *I. scapularis* protein predictions were generated using dipteran protein sequences obtained from GenBank and aligned to the *I. scapularis* genome sequence using the programs AAT<sup>14</sup> and GeneWise<sup>15</sup>. The *I. scapularis* EST set comprising 193,151 EST and cDNA sequences was aligned to the genome sequence (Supplementary Fig. 5) and high quality alignments were used to produce automated annotations based on gene structure using the software package PASA<sup>16</sup>. ESTs were also used to evaluate and capture potential genes in small contigs that were not initially included in the annotated scaffolds. EST hits to small contigs that are not part of the annotated scaffolds typically represent transcripts derived from transposable elements such as non-LTR type elements and do not contain an open reading frame. Finally, the *ab initio* gene prediction programs Augustus<sup>17</sup> and GeneZilla<sup>18</sup> (formerly known as TIGRscan) were used to generate gene models. VectorBase homology-based gene predictions were then incorporated into JCVI database and the gene sets were subsequently combined using EvidenceModeler<sup>19</sup>.

## VectorBase Gene Prediction Pipeline

The Ensembl pipeline<sup>20</sup> was used to predict non-coding and protein coding genes based on mRNA, EST/cDNA and protein evidence. The supercontigs were masked with the repeat libraries described above. UniProt protein sequences<sup>21</sup> were mapped to the *I. scapularis* supercontigs using the Genewise program<sup>15</sup>. Two gene sets were produced based on the taxonomic origin of the proteins: (1) a “targeted” gene set from *I. scapularis* proteins only, with strict criteria, and (2) a “similarity” gene set from the remaining proteins. In the “similarity” gene set, gene predictions were prioritized according to protein origin: genes based on phylogenetically close species were placed first on the genome, then non-overlapping models based on more phylogenetically distant species were added, and finally eukaryota- and metazoa-based gene models were used to fill in gaps. Independently, the *I. scapularis* EST and mRNA sequences were mapped to the supercontig sequences using the Exonerate program<sup>22</sup>, generating a third gene set. Finally, a fourth *ab initio* gene set was produced using the SNAP program<sup>23</sup> and supercontig sequences, and retaining only those predictions containing a Pfam domain. The four gene sets were merged into a single gene set that was then subsequently combined with the JCVI gene predictions.

Supplementary Figs. 1-3 show a comparison of haploid nuclear genome size (in Mb) to features associated with the coding fraction of the genome (gene/exon/intron number and length) for 12 sequenced arthropod genomes based on EnsemblGenomes release 12. While *I. scapularis* has the largest haploid genome of any sequenced arthropod, the gene number and length, exon number and length, and intron number and length statistics for *I. scapularis* are similar to those for other sequenced arthropods. Together, these analyses suggest that the genome size of *I. scapularis* reflects the accumulation of significant amounts of non-coding sequence.

## Sequencing of the *Ixodes scapularis* Transcriptome

As part of this project, 183,834 *I. scapularis* EST sequences were generated by Sanger sequencing of a pooled *I. scapularis* stage and tissue library and are available at GenBank and VectorBase (ESTs accession range: EW781064-EW964897). The cDNA library was constructed from total RNA extracted from the following stages: *I.*

*scapularis* embryos, blood fed larvae, nymphs blood fed for 1-3 days, fully engorged nymphs, unfed males, unfed females, and adult females blood fed for two, four and seven days. The majority of ESTs align to IscaW1 scaffolds ranging in size from 10-500 Kb (Supplementary Fig. 5).

### **Gene Ontology Analysis of *Ixodes scapularis* Expressed Sequence Tags (ESTs)**

**Methodology.** The predicted protein sequence of the 24,925 *I. scapularis* gene models (protein coding and non-coding RNA genes) was downloaded from VectorBase (<https://www.vectorbase.org/>) in March 2012 and the program Blast2GO<sup>24</sup> (<http://blast2go.de>) was used to predict functional classification for each sequence. The Blast2GO program performs a homology search against the NCBI non-redundant (NR) database and assigns sequence to one of three gene ontology categories (biological process, cellular component and molecular process). Statistical analyses were performed using default settings and pie charts showing assignment to predicted functional category (Supplementary Fig. 6) were generated using a cut-off minimum of 1,000 sequences.

Blast2GO annotations were obtained for approximately 50% of the 24,925 *I. scapularis* predicted protein sequences. The majority of annotations were inferred based on similarity to sequences for *I. scapularis* and the tropical bont tick, *Amblyomma maculatum*, followed by sequences for *Homo sapiens*, *Mus musculus* and *Pediculus humanus*. The majority of GO classifications were inferred based on electronic annotation only. Blast2GO classified the *I. scapularis* sequences into thirteen “Biological Process” functional groups (Supplementary Fig. 6a). For the “Cellular Component” category, the program classified sequences into six functional categories, namely “cytoplasmic part”, “intracellular organelle”, “nucleus”, “intracellular non-membrane-bounded organelle”, “integral to membrane” and “protein complex” (Supplementary Fig. 6b). For the “Molecular Function” category, more than 50% of the sequences were classified as either “hydrolase activity”, “protein binding” and “transferase activity”, while the remaining sequences were classified as “zinc ion binding”, “nucleic acid binding”, “transposase activity”, “oxidoreductase activity” or “purine ribonucleoside triphosphate binding” (Supplementary Fig. 6c).

### ***Ixodes scapularis* Gene and Genome Evolution**

#### **Comparative Evolutionary Analysis of the *Ixodes scapularis* Gene Repertoire**

**Molecular Species Phylogeny.** To estimate the average rate of amino acid substitutions in the conserved cores of orthologs shared across multiple invertebrate and vertebrate species and to reconstruct the arthropod phylogenetic tree, single-copy orthologs from [www.OrthoDB.org](http://www.OrthoDB.org)<sup>25</sup> were selected from *I. scapularis* and 11 additional species, including the Crustacean water flea, *Daphnia pulex*, five insects: *Pediculus humanus*, body louse; *Nasonia vitripennis*, jewel wasp; *Tribolium castaneum*, flour beetle; *Anopheles gambiae*, malaria mosquito and *Drosophila melanogaster*, fruit fly; and five outgroup species: human, mouse, chicken, zebrafish and *Nematostella vectensis* (sea anemone), resulting in 524 Strict Single-Copy (SSC) Orthologous Groups (OGs), with one gene from each species. Multiple protein sequence alignments were performed with MUSCLE<sup>26</sup> for each OG, and conserved well-aligned cores were extracted using GBLOCKS<sup>27</sup> (>66% conservation, 100% flanking, maximum of 8 non-

conserved positions, minimum block size of 4) resulting in 90,763 aligned amino acids, of which 67% showed variation. The phylogenetic tree was computed with PhyML<sup>28</sup> employing the JTT substitution model, estimated proportion of invariable sites, four substitution rate categories, estimated gamma distribution parameter, empirical amino acid equilibrium frequencies, optimized tree topology search, branch lengths, and substitution model parameters, with 100 bootstrap replicates (Fig. 3a).

**Intron Evolution.** The identification of introns in well-aligned sequence regions of single-copy orthologs across representative arthropod and non-arthropod species was performed in a manner similar to that employed in other studies<sup>29</sup>. 524 Strict Single-Copy (SSC) orthologous groups (OGs) were selected from [www.OrthoDB.org](http://www.OrthoDB.org)<sup>25</sup> with one gene in each of the 12 selected species (*NVECT*, *Nematostella vectensis*; *HSAPI*, *Homo sapiens*; *MMUSC*, *Mus musculus*; *GGALL*, *Gallus gallus*; *DRERI*, *Danio rerio*; *ISCAP*, *Ixodes scapularis*; *DPULE*, *Daphnia pulex*; *PHUMA*, *Pediculus humanus*; *NVITR*, *Nasonia vitripennis*; *TCAST*, *Tribolium castaneum*; *AGAMB*, *Anopheles gambiae*; *DMELA*, *Drosophila melanogaster*). A second, larger set of OGs was selected allowing no more than three paralogs in three species and selecting the longest protein per species, resulting in 1,529 Relaxed Single-Copy (RSC) OGs. The introns were mapped on to the protein sequence alignments, allowing for small splice site changes (one amino acid difference) [as observed in other studies<sup>30</sup>], and conserved regions with an intron in at least one species were identified by requiring >30% amino acid identity in the aligned blocks of five columns before and after the intron position, and no species with any missing sequence in the region, resulting in sets of informative intron positions in each species (Supplementary Fig. 11). From a total of 44,222 SSC and 135,216 RSC introns, between 32% and 52% of introns in each species are located in well-aligned core regions of the ortholog alignments and may therefore be compared across the 12 species. Using strict or relaxed orthologous groups (SSC or RSC) does not affect the proportions of informative introns. The non-arthropod species have the most introns, the Dipterans have the least, and *ISCAP* has the greatest number of introns and informative introns among the arthropods. Informative intron positions from the five outgroup species (*NVECT*, *HSAPI*, *MMUSC*, *GGALL*, and *DRERI*), and the five insects (*PHUMA*, *NVITR*, *TCAST*, *AGAMB*, and *DMELA*) were compared to *ISCAP* and *DPULE* to quantify shared and unique intron positions across all 12 species in the strict (SSC) and relaxed (RSC) sets of orthologous groups (Fig. 3b; Supplementary Table 7). Comparing the 18,987 SSC and 53,322 RSC informative introns identified 4,621 and 13,459 intron positions, respectively. Only 42 SSC and 113 RSC intron positions are conserved across all 12 species. Examining pairwise conservation of intron positions between *ISCAP* and each of the other eleven species shows the greatest sharing with the non-arthropods (*NVECT*, *HSAPI*, *MMUSC*, *GGALL*, and *DRERI*), about 3 times more than with *AGAMB* and *DMELA*, and about 1.5-1.8 times more than with *DPULE*, *PHUMA*, *NVITR*, and *TCAST* (Supplementary Table 8).

To reconstruct the 12-species phylogeny based on conservation of intron positions, presence/absence matrices for the 4,621 SSC and 13,459 RSC intron positions across the 12 species were used to compute Euclidean distance matrices with 1000 bootstrap samples in R (Development Core Team 2011). These matrices were used to compute Unweighted Pair Group Method with Arithmetic Mean (UPGMA) and Neighbor Joining (NJ) trees using the neighbor program from PHYLIP<sup>31</sup>. The resulting

trees were ordered and compared using the Newick Utilities<sup>32</sup> to identify bootstrap support values for the consensus trees. Employing the intron presence/absence data as a phylogenetic signal successfully reconstructs the species tree from both the strict and relaxed sets of orthologs using both UPGMA and NJ algorithms (Supplementary Fig. 12). *ISCAP* consistently shows greater similarities to the outgroup species - vertebrates and the sea anemone - than to the pancrustaceans.

To compute intron gain/loss estimates across the phylogeny, the presence/absence matrices for the 4,621 SSC and 13,459 RSC intron positions across the 12 species were analyzed using the MALIN suite for maximum likelihood analysis of intron evolution in eukaryotes<sup>33</sup>. Intron gain/loss rates were first optimized, and then presence/gain/loss estimates were computed with the Dollo Parsimony (DP) and Posterior Probability (PP) algorithms (Supplementary Fig. 13; Supplementary Table 9). The greatest numbers of losses are estimated to have occurred on the Pancrustacea branch, from 1.6-1.7 (DP) to 3.4-3.5 (PP) times more losses than on the Arthropoda branch. *DPULE* stands out as having a large number of intron gains, in agreement with results from the analysis of the *D. pulex* genome<sup>34</sup>.

To compare lengths of introns among the 12-species, the base-pair lengths of all identified pairwise orthologous introns for the strict and relaxed sets between *ISCAP* and each of the other eleven species were collected from their corresponding General Feature Format files. Wilcoxon tests were performed in R (Development Core Team 2011) to evaluate statistical differences in length distributions between species (Supplementary Fig. 14; Supplementary Table 10). Examining the distributions of orthologous intron lengths shows that *ISCAP* introns are most similar to those of *MMUSC* and the other vertebrates, but more than an order of magnitude longer than introns shared with pancrustaceans.

**Orthology.** Examining groups of orthologs delineated across 33 arthropod species from [www.OrthoDB.org](http://www.OrthoDB.org)<sup>25</sup> identified about a quarter of *I. scapularis* genes with recognizable orthologs in each of the representative species selected from six different arthropod lineages: Crustacea, *DPULE*, *Daphnia pulex*; Phthiraptera, *PHUMA*, *Pediculus humanus*; Hymenoptera, *NVITR*, *Nasonia vitripennis*; Coleoptera, *TCAST*, *Tribolium castaneum*; Lepidoptera, *BMORI*, *Bombyx mori*; and Diptera, *DMELA*, *Drosophila melanogaster* (Supplementary Fig. 9). A further quarter of *I. scapularis* orthologs are less broadly conserved across Arthropoda, with gene losses in other species resulting in more patchy phyletic distributions. Of the remaining genes with no identifiable orthology, about half exhibit homology (BLAST e-value  $<1e^{-05}$ ) to genes in the other six representative species or to other *I. scapularis* genes.

### **Gene Duplications in *Ixodes scapularis***

Protein clustering of arthropod genes was performed for *I. scapularis* and ten other arthropods, using reciprocal BLASTP and OrthoMCL clustering methods. Proteome sources for *I. scapularis* and two additional chelicerate species, three Crustacea, five Insecta and two vertebrate outgroup species, as available in 2011, used for these analyses are listed in Supplementary Table 11. To address a deficit of non-insect arthropod gene sets, two transcriptome datasets were included in the analyses, one for the dog tick, *Dermacentor variabilis*, and a second for the shrimp, *Pandalus latirostris*. Similar genes, measured with reciprocal best BLASTP were clustered using standard methods outlined for OrthoMCL<sup>35</sup>. OrthoMCL has practical advantages over related techniques in identifying orthology, and compares favorably in detecting true

orthology<sup>36</sup>. In the present study, significance criteria were applied as per recommended options. Specifically, these criteria were a similarity  $p$ -value  $\leq 1e^{-05}$ , protein percent identity  $\geq 40\%$ , and MCL inflation of 1.5 (this affects granularity of clustering).

Reciprocal best similarity pairs between species, and reciprocal better similarity pairs within species (*i.e.*, recently arisen paralogs, or “in-paralogs”) were added to a similarity matrix. The matrix was normalized by species and subjected to Markov clustering (MCL) to generate orthology groups, including recent in-paralogs. One aspect of the OrthoMCL method that is important to the results is the fact that the program eliminates partial genes from clusters. Thus, short protein sequences that otherwise represent a family, were excluded.

Computational analyses were performed to evaluate the contribution of gene duplications to the complement of *I. scapularis* genes and to explore the possibility of one or more whole-genome duplication events in the evolution of this species. Putative duplicated sequences (paralog pairs) were identified in the *I. scapularis* transcriptome using a method based on that of<sup>37</sup>. Briefly, 20,901 tentative consensus (TC) sequences, produced by alignment of 192,461 *I. scapularis* ESTs, were downloaded from the Dana Faber Cancer Institute – The Gene Index Project ([compbio.dfci.harvard.edu/tgi](http://compbio.dfci.harvard.edu/tgi)) on February 19, 2008. The program *getorf*<sup>38</sup> was used to identify all possible open reading frames (ORFs) for each TC sequence. The longest ORF for each sequence was selected using *longorf* and Vmatch (<http://www.vmatch.de>) was used to perform an “all-against-all” nucleotide sequence comparison of each ORF translated in six reading frames. Sequence pairs with at least 75% nucleotide similarity within a predicted open reading frame were identified as candidate paralog pairs.

Predicted protein sequences for *I. scapularis* and other arthropods, as identified by OrthoMCL, are summarized in Supplementary Table 11. This table shows groups of genes clustered based on orthology groups (singletons or duplicates) and unique groups of paralogs. The number of orthology groups found in *I. scapularis* approaches that for insects, while the other two Chelicerate species, *Tetranychus urticae* and *D. variabilis*, have considerably fewer groups. The tabulation of missed orthology groups (OrMis1) is somewhat higher for the Chelicerata, with *I. scapularis* missing the fewest number of groups. This result may be either partly or entirely explained by shorter, partial genes that predominate in the datasets available for species of this clade. By comparing species protein sizes to the median size for each gene family, we found that *I. scapularis* has a -123 amino acid (aa) average difference, and 24% short outliers (2 standard deviations shorter), *T. urticae* has -25 aa, 10% short outliers, and *D. variabilis* has 75% short outliers (note that analyses were based on an artifactually incomplete transcriptome for this species). The Crustacea range from -80 aa to +10 aa average difference from the median, while the Insecta average above the median gene family size. While these results suggest that *I. scapularis* may be missing common gene families, the more likely interpretation is that the tick has fragmented, artifactually short genes, and the same may also be true for *T. urticae*.

Analyses of the *I. scapularis* transcriptome revealed no signatures of large-scale gene duplication or entire genome duplication events. Nucleotide sequence comparison of the longest ORFs corresponding to each of the 20,901 unique *I. scapularis* TCs identified 4,786 putative paralog pairs, suggesting that approximately 22% of *I. scapularis* transcripts are derived from tandemly duplicated genes. This percentage is consistent with estimates of paralog content in the genomes of other organisms. For

reference, paralogs are estimated to comprise approximately 10%, 15% and 20% of the total gene content of the yeast, *Sachharomyses cerevisiae*, *H. sapiens* and the roundworm, *C. elegans*, respectively<sup>39</sup>.

An improved *I. scapularis* gene set assembled from RNAseq data is publicly available here: <http://arthropods.eugenesis.org/EvidentialGene/arthropods/deertick/>

A summary document summarizing this improved *I. scapularis* gene set and other arthropod gene sets is available here:

[http://arthropods.eugenesis.org/EvidentialGene/arthropods/Arthropod\\_Orthology\\_Completeness/](http://arthropods.eugenesis.org/EvidentialGene/arthropods/Arthropod_Orthology_Completeness/)

## **Analysis of Repetitive Sequences in the *Ixodes scapularis* Genome**

### **Identification of Tandem Repeats (TRs) in a Small Insert *Ixodes scapularis* Genomic Library**

The Tandem Repeats Finder software<sup>40</sup> was used to analyze DNA sequences obtained from end-sequencing of a small-insert *I. scapularis* gDNA library described previously<sup>41</sup> (Supplementary Table 12). Only end-sequences with a sum total of TRs  $\geq 100$  bp were included. TRs from both the 5' and 3' end sequences for each corresponding clone were summarized together.

### **Identification and Analysis of Repetitive DNA in the IscaW1 Assembly**

Repeat sequences were identified with RECON<sup>12</sup> and RepeatScout<sup>11</sup>, and collated into a library that was then used to mask the genome with RepeatMasker<sup>13</sup>. *Ixodes scapularis* Class I and II TEs were identified based on structural features and sequence similarities to other reported TEs (Supplementary Table 13), and are available for download from the TEFam database at: <http://tefam.biochem.vt.edu>.

**Miniature Inverted Terminal Repeats (MITEs).** The repeat library IxRepeatlib022908fsa was used to run FINDMITE<sup>42</sup> (no requirement of direct repeat; terminal inverted repeat at 12 bp with no mismatch, and MITE length was set at 100-700 bp). The resulting candidates were used as query to run TEalign, which is a pipeline that runs BLAST against the *I. scapularis* genome, retrieves matching copies plus flanking sequences, and performs clustal alignments. TEalign results were used to manually assess whether each element is a MITE and to classify them, on the basis of clear boundaries shared by multiple copies, terminal inverted repeats, and target site duplications. After obtaining the initial list of MITEs using methods described above, multiple rounds of self-BLAST were performed to remove redundancy using a cut-off of overall 80% identity. The non-redundant MITEs are used as a library to perform RepeatMasker (-div 20). Run RepeatMasker output was used to count MITE copy number and % genome occupancy (Supplementary Table 13). RepeatMasker may overestimate the copy number of elements as one copy may be broken into multiple pieces. Relatively stringent FINDMITE parameters were used for these analyses and it is likely there are additional MITEs await annotation.

**LTR Retrotransposons.** LTR retrotransposons were identified in the genome assembly and 45 BAC clones using both structure and homology-based approaches (Supplementary Figs. 7-8; Supplementary Table 13). LTR\_STRUCT (Version 1.1)<sup>43</sup> allowed the identification at the structural level. For the homology-based approach, the strategy defined by<sup>44</sup> was employed with refinements<sup>45</sup>. Briefly, the canonical

sequences of LTR retrotransposons from several insect genomes were recruited from Repbase<sup>46</sup> and Tefam. TBLASTN<sup>47</sup> was used to search for sequence homologous to the *pol* region of representative LTR retrotransposons in the *I. scapularis* genome. Those hits showing at least 30% amino acid identity over at least 80% of the length of the query sequence were subjected to further analyses to identify both LTRs of each element by means of BLAST2 sequences<sup>48</sup>. This first part of the strategy allowed the identification of canonical sequences representing complete copies that are putatively active and/or consensus sequences corresponding to those constructed after alignment of at least three complete copies of each LTR retrotransposon element in the tick genome. BLASTN searches<sup>47</sup> were then performed using as query each one of the consensus/canonical sequences for each LTR retrotransposon element and providing a list of coordinates of putative each element in the genome. The final criterion used to define two copies as belong to the same LTR retrotransposon element was an identity of 80% or greater at the nucleotide level.

**Non-LTR Retrotransposons.** Non-LTR transposable elements were identified using a homology-based approach, named TESeeker<sup>49</sup>. To classify the putative TEs obtained from TESeeker, BLASTN searches were performed with each putative TE and the top hit was identified. Next, the longest intact ORF was identified and analyzed using a “classifier.” The classifier operates as follows: a library of reverse transcriptase conserved domains (CD)<sup>50, 51</sup> for insect non-LTR retrotransposons was used to classify the ORFs, and, in turn, the original hits. First, the longest ORF of the putative TEs was aligned using MUSCLE<sup>26</sup> to the available CDs for the clade used to generate it. Next, the ORF was trimmed according to the average length of the CD for that particular clade. Only sequences that were at least 95% of the average length of the CD were trimmed and further analyzed. Next, the resulting putative non-LTR was aligned to the entire set of Class I CDs, again using MUSCLE, and an element was inferred from the maximum likelihood tree built from the previous multiple sequence alignment using PhyML<sup>52</sup>. A putative element was considered part of a clade if the branch length for that clade was less than 3.0 and the clade was the closest.

To obtain the representation within the genome, TBLASTN searches were performed using the putative TEs as queries, each of which represented an element within the clade. Hits were counted if they were at least 80% identical to the query and were at least 40% of the query length (shown as “Copy Number” in Supplementary Table 13). Next, to estimate the total genome percent and total base pairs, an assumption was made for each element having intact conserved domains, that the reverse transcriptase was full-length. Knowing the average length of an element for each clade enabled extrapolation of the amount of base pairs for a full-length element, and it is recognized that this may produce an overestimate.

**Transposable Element Coding Sequences.** A search of the *I. scapularis* genomic DNA for transposable element coding sequences was devised by (1) performing PSI-BLAST of the coding regions of representatives of the diverse families of transposable elements against the non-redundant database from NCBI; (2) constructing matrices from the alignments to be used by the tool RPS-BLAST; (3) retrieving genomic matches by RPS-BLAST against this database that were larger than 500 nucleotides (nt) and with an  $e$  value  $< 1e^{-15}$ , with an additional 500 nt of flanking regions; (4) identifying terminal repeats (direct and inverted) and trimming the sequences accordingly (sequences without repeats were trimmed on their coding

sequences); (5) clustering the data set of 7,461 elements having 90% identity over 90% of the sequence length to obtain 5,522 clusters of elements, then (6) comparing the consensus sequences to several databases by BLAST, and finally (7) running a program to classify these elements. The data were displayed on a hyperlinked excel spreadsheet from which any element, as well as the corresponding database matches, can be retrieved. The results are summarized in Supplementary Table 14.

Several mariner and piggyBac elements were found containing a full length transposase without stop codon or frame shifts and having inverted repeats. The database is freely available from [http://exon.niaid.nih.gov/transcriptome/l\\_scap\\_te/is-te-web.xls](http://exon.niaid.nih.gov/transcriptome/l_scap_te/is-te-web.xls) and the FASTA file from [http://exon.niaid.nih.gov/transcriptome/l\\_scap\\_te/is-te-JoseRibeiro-fasta.zip](http://exon.niaid.nih.gov/transcriptome/l_scap_te/is-te-JoseRibeiro-fasta.zip).

Repetitive elements comprise a dynamic component of the coding and non-coding regions of eukaryotic genomes<sup>53,54</sup> (Supplementary Tables 13-14). In addition to the 38 well-represented LTR retrotransposon elements identified in the *Ixodes* genome by means of a homology-based approach, we identified an extra set of 83 lower quality LTR retrotransposon elements in the *I. scapularis* genome assembly and 45 BAC clones by means of LTR\_STRUC software, most of which probably correspond to remnants of ancient mobilizations. Only 20 out of these 83 elements had intact or well-conserved ORFs that permitted further classification (Supplementary Table 13). The *I. scapularis* genome has a moderate amount of non-LTR retrotransposons (Supplementary Table 13). Most of these non-LTRs are non-functional, and have frame-shift mutations and indels. For those with a complete reverse transcriptase (RT) ORF, necessary for accurate classification, the CR1 clade contributed the most copies to the genome. The fact that a high number of distinct TE families were observed in the relatively young and evolutionarily close CR1 and L2 clades<sup>51,55</sup> may be explained by the lack of a controlling mechanism within the *I. scapularis* genome, which allowed propagation and maintenance within the genome. Unlike other arthropods, the *I. scapularis* genome seems to lack a number of non-LTR clades such as R2, RTE, and LOA that are present in mosquitoes and *Drosophila*<sup>56,57,58,59</sup>. It is possible that these elements may have been present in the *I. scapularis* genome but may have been controlled and degraded, thus preventing their identification. A large number of non-LTR retrotransposons could not be classified to clade due to a low level of conservation and degradation of their RT ORF. For the purpose of this analysis, these elements were grouped into the “unclassified non-LTRs” category.

## **Arrangement of DNA on the *I. scapularis* Chromosomes**

### **Physical Mapping Using Fluorescence *in situ* hybridization (FISH)**

Mitotic chromosomes were obtained from passage 31 of *I. scapularis* cell line ISE18<sup>60,61</sup>. Demecolcine (0.1 µg/ml) was added to the culture for 6-8 h to stop mitosis in metaphase and increase yield of chromosomes spreads for FISH. ISE18 chromosome preparations were held at -20°C in fixative until use. *Cot*-1 DNA was prepared for *I. scapularis* according to previous protocols<sup>62</sup> and used for FISH. Forty-five clones, corresponding to those fully sequenced and assembled herein, were selected from the 10X BAC library and grown in overnight cultures prior to BAC DNA isolation, according to<sup>2</sup>. FISH probes were prepared by labeling BAC DNA with either a biotin- or digoxigenin nick translation mix (Roche Molecular Biochemicals, Indianapolis, IN).

Unincorporated nucleotides were removed from the samples with the QIAquick Nucleotide Removal Kit (Qiagen, Valencia, CA). A small insert (approximately 4 kb) gDNA clone library was prepared from sheared *I. scapularis* egg DNA (Wikel strain) using the TOPO PCR 4.0 cloning vector (Invitrogen, Carlsbad, CA)<sup>41</sup>. End-sequencing of a 384-well plate from this library was conducted at the Purdue University Genomics Core Facility, and the sequences are available at GenBank (Accession numbers GU318418–GU319109). Clones with end sequences comprised of at least 100 bp of tandemly-repetitive DNA, as identified with Tandem Repeats Finder software<sup>40</sup>, were selected for FISH experiments (Supplementary Table 12). Clones were grown in 5 ml of LB medium + antibiotic, and plasmid DNA was extracted using the QIAprep spin miniprep kit (Qiagen, Valencia, CA). Plasmid DNA was labeled and used for FISH according to published methods<sup>41</sup>. Probes based on the (TTAGG)<sub>n</sub> motif used to localize the telomeres were also constructed and the protocol for FISH and imaging processes was carried out as described previously<sup>2,41</sup>.

FISH using *I. scapularis* C<sub>0</sub>t-1 DNA showed strong hybridization signals to the termini of nearly all chromosomes prepared from ISE18 cells (Fig. 2a). This pattern mirrored that observed with FISH probes for the ISR-2 tandem repeat family (95-99 bp repeat units) and high molecular weight *Hpa*II-insensitive gDNA of *I. scapularis*, also believed to contain these same tandem repeats<sup>41</sup>. FISH using clones containing tandem repeats other than the ISR1-3 tandem repeat families were tested and these experiments showed several examples of tandem repeats that had prominent hybridization patterns dispersed among the presumed euchromatic regions of the chromosomes (Fig. 2c; Supplementary Table 12).

A total of 45 clones from the 10X BAC library, representing those that were completely sequenced and assembled, were hybridized to ISE18 chromosomes (Supplementary Table 15). Fig. 2d-f depicts a representative example of these experiments, where a non-specific hybridization pattern was observed that is thought to reflect repeats dispersed among euchromatic regions of the chromosomes. Note that the terminal regions at one end of nearly all chromosomes are devoid of a hybridization signal to the representative BAC clone shown; this is the area to which the C<sub>0</sub>t-1 DNA-fractionated DNA hybridized (as well as the ISR-2 repeats and high molecular weight *Hpa*II-insensitive gDNA of *I. scapularis*) and is thought to represent the centromere. Only three BAC clone hybridizations resulted in specific hybridization signals; these patterns matched that of hybridizations with markers for either the NORs or the ISR-3 tandem repeat family<sup>41</sup>.

Analysis of the *I. scapularis* genome for signature telomeric sequences resulted in the discovery of a mixture of (TTAGG)<sub>n</sub> and (TTAGGG)<sub>n</sub> motifs in short stretches interrupted by other DNA sequences. This information agreed with previous findings<sup>63</sup>, where the (TTAGG)<sub>n</sub> telomeric motif was characterized by stretches <3 kb in the related tick, *Ixodes ricinus*. This feature of *Ixodes* species is in contrast with that reported in other arthropods typically having (TTAGG)<sub>n</sub> motifs in stretches of ~20 kb<sup>63</sup>. FISH hybridization of a (TTAGG)<sub>n</sub> probe to *I. scapularis* chromosomes showed a “two-spot” hybridization pattern at the termini of all sister chromatids of mitotic chromosomes (Fig. 2b)<sup>41</sup>. The position of the telomeric repeats relative to the nearly adjacent centromeric heterochromatin supports a telocentric (or acrocentric) chromosome structure, consistent with the original description of ISE18 chromosomes<sup>61</sup>.

An ideogram (Fig. 2g) of *I. scapularis* chromosomes (2N=28 with an XX, XY sex determination system) was constructed based on the relative hybridization patterns of several tandem repeats to mitotic chromosomes prepared from cell line ISE18<sup>41,61</sup>. These repeats include a telomeric (TTAGG)<sub>n</sub> motif, the nucleolar organizing regions (NORs), and major repeat families ISR-1, ISR-2a, ISR-2b, and ISR-3<sup>41</sup>. Physical mapping of these markers provided a basis to distinguish individual as well as several different groups of chromosomes. Those that can be readily distinguished include the sex chromosomes X (the largest) and Y (the smallest), as well as three pairs of chromosomes that hybridize to only ISR-1, ISR-2a, and ISR-2a + ISR-3, respectively. Also, an additional pair of chromosomes can be identified based on hybridization to ISR-2a over approximately half the entire chromosome. The other chromosomes in the karyotype were grouped according to their hybridization signals to these markers, but could not be reliably paired or distinguished from similar chromosomes. These groups include those that show signals for ISR-2a + NOR (4 chromosomes), ISR-1+ISR2a (4 chromosomes), and the remaining chromosomes that hybridize only to ISR-2a (10 chromosomes), respectively. This ideogram representing the current *I. scapularis* physical map serves as an anchor to position additional FISH markers as they are further developed.

### ***Ixodes scapularis* Genes and Gene Families**

#### **The *Ixodes scapularis* Sialome**

The saliva of blood sucking arthropods consists of a complex mixture of peptidic and non-peptidic compounds that disarm their hosts' hemostasis, inflammation and immunity, thus helping blood feeding. Antimicrobial compounds are also commonly found, and these may protect the ingested meal from bacterial overgrowth, as well as protecting the feeding lesion in the case of hard ticks. While hematophagous insects have near one hundred salivary polypeptides identified from transcriptome analysis, saliva of hard ticks may contain several hundred polypeptides. Comparative transcriptome analysis of related arthropods indicates that salivary gland gene products are evolving at a fast pace, perhaps due to the immune pressure imposed by their hosts. Indeed, while salivary peptides can belong to ubiquitous protein families, unique salivary protein families are found at a genus and even subgenus level. These unique families probably derive from a gene common to the family or order ancestor but rendered unrecognizable by divergent evolution<sup>64,65</sup>. Gene duplications are commonly associated with salivary genes, even within insects having relatively compact genomes, such as the mosquito *An. gambiae* (~278 Mb, three pairs of chromosomes)<sup>54</sup>, where the uniquely Nematoceran D7 family consists of eight genes, and the uniquely anopheline G1 protein family has six genes<sup>66</sup>. In insects with larger genomes, or perhaps more importantly, larger number of chromosomes, such as the kissing bug *Rhodnius prolixus* (~600 Mb, 11 pairs of chromosomes)<sup>67</sup>, dozens of gene products coding for salivary lipocalins have been described, and are possibly derived from both gene duplication and genome duplication events<sup>68,69</sup>. In *I. scapularis* (~2.1 Gb, 14 chromosome pairs)<sup>1,61</sup>, a large expansion of the lipocalin family (associated with anti-complement and anti-inflammatory activities), as well as proteins containing Kunitz domains (associated with serine protease inhibitory activity as well as channel blockers, functioning as anti-clotting and possibly as anesthetics or vasodilators)<sup>70,71,72,73</sup> were identified, in addition

to other gene expansions for numerous unique protein families<sup>74,75</sup>. Sialotranscriptome analysis based on ~8,000 ESTs from nymphs and adults at different stages of feeding led to the identification of 26 different groups of proteins (not including housekeeping proteins)<sup>74</sup>. Of these 26 families, 16 are either unique to ticks, or found only in the genus *Ixodes*, based on available sequence data<sup>64</sup>. When the deduced protein sequences were compared within a family, and a smaller than 90% sequence identity was used as a threshold level, 197 sequences were identified as possibly derived from individual genes (Supplementary Table 16); more closely related sequences are possible alleles or may derive from conserved gene duplication events. The large amounts of gene duplicates may provide a mechanism for antigenic variation, by differential expression of genes during the feeding process, as observed for *I. scapularis* cystatins<sup>76</sup>, while polymorphism may be maintained by frequency dependent selection of antigenic epitopes<sup>74</sup>.

The availability of the draft genome of *I. scapularis* allows for verification of these salivary gene expansions and provides a platform for determining temporal and tissue specificity of these genes. In particular, it provides evidence for the large expansion of proteins with Kunitz domains, as well as for the apparent lack of genomic evidence for the expansion of unique protein families, such as the WC-10 family, or the anti-complement ISAC family.

**Kunitz-domain family.** Seventy-four of the 20,452 annotated tick proteins possess one or more Kunitz domains (Supplementary Table 16), making the tick genome the richest source of proteins with this domain. Only 25 of the 46,704 human proteins, or 33 of the 26,255 bovine proteins have this signature as revealed by the KU Smart signature<sup>77</sup> (Ensembl Proteome sets obtained at 7/31/2008). For comparison with insect proteomes the mosquitoes *Aedes aegypti*, *Culex quinquefasciatus* and *An. gambiae* have five, eight and four proteins respectively, with Kunitz domains (mosquito proteomes obtained from VectorBase in Dec/2009). Interestingly, no Kunitz domain-containing proteins were found in sialotranscriptomes of these three mosquitoes, but they occur in the sialomes of *Culicoides*<sup>78,79</sup> and *Simulium*<sup>80</sup>, indicating a case of convergent evolution in the salivary recruitment of genes to assist blood feeding. Two *I. scapularis* proteins, Ixolaris and Penthalaris, containing two and five Kunitz domains, respectively, have been functionally characterized as potent inhibitors of the extrinsic pathway of blood clotting<sup>81,82</sup>. It is possible that this large family contain also channel blockers with toxic or vasodilatory properties, as recently identified for a Kunitz protein from a metastriate tick<sup>73</sup>.

**WC-10 and Isac families.** The WC-10 protein family codes for mature proteins with masses near 10 kDa and a tryptophan-cysteine dipeptide motif at their carboxyterminus. Their function is unknown. Twenty-one members of the WC-10 family were identified in previous sialotranscriptome studies, but only four such proteins are found in the deduced tick proteome (Supplementary Table 16). Inspection of shotgun sequences indicates that some additional members of this family may be found, but not all. Similarly, four members of the Isac family of anticomplement proteins have been described, but only one protein of this family is found in the deduced proteome, coding for a protein that is only 65% identical to previously reported anticomplement proteins. Shotgun sequences, however, are found that code for three of the Isac proteins, indicating these may not have assembled into the genomic scaffolds. On the other hand, tick salivary proteins may be under strong evolutionary pressure imposed by their

host's immunity and thus may differ among geographical strains, which differed between the salivary EST and genome sequencing sets.

### ***Ixodes scapularis* Innate Immunity/Tick-Pathogen Interactions**

Computational analysis to identify putative immune-related genes within the *I. scapularis* genome was performed using information available in GenBank<sup>83</sup>, VectorBase<sup>84,85</sup>, Ensembl<sup>86</sup>, and OrthoDB<sup>25</sup>. An extensive BLAST search (default parameters) was performed to identify sequences sharing homology with previously identified members from *D. melanogaster*, *An. gambiae* and *Ae. aegypti*. When multiple similar sequences were available for BLAST search, the longest isoform was used as a query. Sequences were then analyzed within Ensembl, OrthoDB and VectorBase to address gene prediction as orthologues and/or paralogues. Proteins sequences were also retrieved based on lists of significant BLASTp hits, and analyzed using Pfam<sup>87</sup> and PROSITE<sup>88</sup> for conserved domain identification. The results illustrated here (Supplementary Figs. 22-23) correspond to sequences obtained as orthologues for *I. scapularis* following subsequent manual curation. Retrieved *I. scapularis* sequences were further analyzed using PROSITE and the Conserved Domain Database for JAK-STAT domain identification<sup>89</sup>.

**Toll pathway.** Our *in silico* approach identified four protein sequences annotated as peptidoglycan recognition receptors (PGRPs) (Supplementary Table 17; Supplementary Fig. 22a). However, our group did not assign a function to these genes, as PGRP isoforms may be categorized either in the Toll or the IMD pathways. We did not identify any Gram-negative binding protein (GNBPs). All bioinformatics comparisons using *Drosophila* GGBP1 or 3 as a query against the *I. scapularis* genome yield high e-values and no apparent functional correlation. Spaetzle processing enzyme (SPE) is a CLIP domain-containing serine protease. Multiple sequences could be found carrying CLIP and trypsin-like serine protease domains in the *I. scapularis* genome. However, their precise role is unclear. Modular serine protease (ModSP) and Grass leads to SPE cleavage. ModSP carries four low-density lipoprotein-receptor class A domains and a complement control protein (CCP) module. We did not identify any sequences carrying both domains. Grass, which shows a trypsin-like serine protease characteristic domain, shares similarity with several secreted salivary gland peptides (e-values <  $1e^{-45}$ ). However, further studies are needed to properly identify a precise Grass and persephone counterpart in *I. scapularis*. We identified ten Toll sequences in the *I. scapularis* genome. Five of these sequences encode for either the characteristic Toll/Interleukin-1 receptor (TIR) or Leucine Rich Repeats (LRR) domains, but not both. An *I. scapularis* homologue of the adaptor molecule myd88 was uncovered, as well as homologues containing Death domains (DD) characteristic of the Pelle-Tube complex. We have also identified an embryonic polarity Dorsal homologue and a Cactus-like inhibitor of I $\kappa$ B carrying ankyrin repeats. Similar to what has been described in mosquitoes<sup>90,91</sup> we did not observe any homologue of the NF- $\kappa$ B factor dorsal-related immunity factor (DIF).

**IMD pathway.** Our *in silico* approach failed to identify a significant number of molecules involved in the IMD pathway (Supplementary Table 17; Supplementary Fig. 22b). Diaminopimelic (DAP)-type peptidoglycan (PGN) recognition leads to intracellular signaling through the adaptor molecule IMD, a DD-containing adaptor molecule that interacts with the PGRP receptors and triggers association of Fas-associated protein

with DD (FADD). We did not observe any IMD or FADD homologues in the *I. scapularis* genome. These results can be explained by either a high degree of gene dissimilarity between species (*i.e.*, IMD was also not identified in the louse<sup>92</sup> and pea aphid genome<sup>93</sup>), or these sequences were not represented during *I. scapularis* genome assembly). Furthermore, the large evolutionary distance between ticks and dipteran insects made it challenging to uncover genes using homology-based methods. By searching the *I. scapularis* genome for DREDD-like caspases, we uncovered six caspases, four of which are annotated as “caspases” in VectorBase and Genbank. Two other sequences were also identified but are annotated as caspase-2 and 3. The cleavage of IMD exposes an inhibitor of apoptosis binding motif to allow recruitment of inhibitor of apoptosis proteins 2 (IAP2). We uncovered an IAP2 homolog in *I. scapularis*. In *Drosophila*, DIAP2 interacts with IMD and leads to IMD K63-ubiquitination. This ubiquitination involves Uev1a, Ubc13 (also known as Bendless) and Ubc5, or Effete. Our analysis indicated that these enzymes are highly conserved in the *I. scapularis* genome. Polyubiquitination of IMD seems to be essential for recruitment activation of the downstream Transforming growth factor  $\beta$ -activated kinase 1 (TAK1) and the I $\kappa$ B kinase (IKK) complex, as well as for binding of TAB2 (TAK1-binding protein 2). We identified *I. scapularis* homologues of TAK1, TAB2 and the IKK complex. Once IKK complex is activated by TAK1, it phosphorylates relish, a bipartite NF- $\kappa$ B protein that has both a Rel homology domain and I $\kappa$ B-like ankyrin repeats. A relish orthologue was successfully uncovered in the *I. scapularis* genome. Similarly, the negative regulators Plenty of SH3 domains (POSH), Caspar and Caudal were also observed in the *I. scapularis*. Recently, akirins have emerged as another nuclear factor regulating immune responses in parallel with NF- $\kappa$ B in mice and in the context of the IMD pathway in *Drosophila*<sup>94</sup>. We have also identified an akirin homologue in *I. scapularis* – subolesin<sup>95</sup>.

**JAK/STAT.** Candidate orthologues for all three core members of the JAK-STAT pathway (*e.g.*, receptor, JAK kinase, and STAT activator) were identified along with putative orthologues for the following regulators: suppressor of cytokine signaling (SOCS) and protein inhibitor of activated STAT (PIAS) (Supplementary Table 17; Supplementary Fig. 23).

**RNAi pathway.** The RNAi pathway is found in many eukaryotes<sup>96,97</sup>. Generally, the RNAi pathway can be categorized in two main signaling cascades: the siRNA (short-interfering) and the miRNA (micro) networks. The siRNA pathway is activated in response to endogenous or exogenous dsRNAs (double stranded) and has been associated with defense against viruses and transposable elements. Conversely, the miRNA cascade is only activated in response to endogenous dsRNA and differences in target mRNA complementarity may affect the final post-transcriptional gene silencing (*i.e.*, mRNA cleavage or translation arrest)<sup>98,99,100,101</sup>. In the *Drosophila* siRNA pathway, the RNaseIII-like Dicer-2 enzyme cleaves a long dsRNA into a small 20-25bp dsRNA molecule. R2D2, a RNA-binding protein, interacts with Dicer-2 to promote loading of a now single-stranded siRNA into a RNA-inducible complex (RISC). A major component of RISC is the RNase-H enzyme Argonaute, which degrades the target mRNA, complementary to the sequence encoded by the antisense siRNA, and promotes gene silencing. We have identified two Dicer homologues in the *I. scapularis* genome (Supplementary Fig. 23b). We did not identify a homologue for R2D2. However, five sequences sharing homology with Argonaute were discovered in the genome. Recent studies have indicated the RNAi antiviral response is extremely complex in

invertebrates, and an increasing number of molecules have been implicated in this pathway, controlling production of a range of virus-derived small RNAs. A list of other *I. scapularis* homologues is provided in Supplementary Table 17.

**Other immune-related genes.** We identified homologues of several immune-related gene in the *I. scapularis* genome (Supplementary Table 17) but the precise pathway controlling their expression cannot be predicted solely by comparative genomics. Differential expression of antimicrobial peptides (AMPs) after infection, particularly, corresponds to a key component of immunity in *Drosophila* and mosquitoes. While *Drosophila* has seven AMP families, each one having several members, we identified only defensins and defensin-like molecules in *I. scapularis*. In mosquitoes, families of defensins and cecropins are the most predominant AMPs and they are represented by multiple members<sup>102</sup>. In a more extreme case, extensive searches in the pea aphid genome failed to identify any AMPs<sup>93</sup>. Our bioinformatics analysis confirmed the presence of genes previously annotated as AMPs: defensin, scapularisin, microplusin and two unnamed AMPs. Based on a more robust computational approach, a recent publication has suggested an expansion of the defensin family in *I. scapularis* genome<sup>103</sup>. We were unable to find in the *I. scapularis* genome any gene sequences sharing similarity with attacin, dipterin, drosocin, drosomycin or cecropin. Other important homologues uncovered include the enzymes Dual and NADPH oxidases, which control production of reactive oxygen species, and lysozymes, fibrinogen-related and thio-ester containing proteins, all of which contribute to the immunological process upon microbial infection.

### ***Ixodes scapularis* Mevalonate-Farnesal Pathway Genes**

A BLASTX and BLASTN search of the *I. scapularis* genome for the insect enzymes involved in the synthesis of juvenile hormone (JH) III revealed the presence of all but two of the enzymes involved in the farnesyl-PP pathway (Supplementary Fig. 18; Supplementary Table 18). The genes found were acetoacetyl-CoA thiolase, hydroxymethylglutaryl-CoA synthase, hydroxymethylglutaryl-CoA reductase, mevalonate kinase, phosphomevalonate kinase, diphosphomevalonate decarboxylase and farnesyl diphosphate synthase. Shown are the *I. scapularis* supercontig numbers and gene accession numbers. The top insect BLAST results from these *I. scapularis* messages had e-values ranging from  $1e^{-44}$  to 0.0. Isopentenyl diphosphate isomerase and geranyl diphosphate synthase were not found. Transcripts for all but two of the enzymes involved in this pathway have been found in the adult synganglion transcriptomes of the hard ticks, *I. scapularis* and the American dog tick, *D. variabilis*, and only one missing from the soft tick, *Ornithodoros turicata*. In the insect JH III branch (Supplementary Fig. 18), only two enzymes were found in the *I. scapularis* genome, farnesol oxidase and methyl transferase (MT), the former also found in the *I. scapularis* and *D. variabilis* synganglion transcriptomes and MT in all three synganglion transcriptomes. The farnesol oxidase transcript has the classic SDR family motif and shares 60% identity with the pollinating wasp, *Ceratosolen solmsi marchali* (e-value,  $1e^{-99}$ ). MT with a top BLAST hit for JH MT from the insect, *Schistocerca gregaria* (e-value,  $4e^{-18}$ ) was found (Supplementary Table 18). Whether this enzyme functions as a JH MT in ticks is not known. There has been a large expansion of the MT gene family (Supplementary Fig. 19). It appears the MTs in *I. scapularis* examined so far do not have a JH binding domain. Farnesyl diphosphate pyrophosphatase, farnesal

dehydrogenase and JH epoxidase were not found. JH epoxidase in insects in the P450 family CYP15A1 is responsible for the addition of the C10-11 epoxide to methyl farnesoate to produce JH III; this family of P450s was not identified in the *I. scapularis* genome.

Biochemical studies of tissue extracts further support the hypothesis that ticks lack JH. In published work<sup>104</sup>, radio HPLC was unable to detect methyl farnesoate, JH I, JH II, JH III, or JH III bisepoxide in different tissues, including the synganglion of the soft tick (*Ornithodoros parkeri*) and the hard tick (*D. variabilis*) at different stages of development; the lower detection limit for JH and methyl farnesoate in these studies in the synganglion was 1.3 fmol for 10-tick equivalents in a 3 hour incubation. In the same study, no JH I, JH II, JH III, JH III bisepoxide, or methyl farnesoate was detected in adult hemolymph at the time of egg development in the same ticks as determined by EI GC-MS; the MS sensitivity was 1.6 pg in the scan mode from 40 to 300 AMU and 750 fg in the SIM mode for fragments at m/z 76 and 225. The same study failed to identify any lipid soluble material from whole body extracts of eggs, larvae, nymphs and adults of *D. variabilis* that would result in the retention of larval characters in the *Galleria* moth bioassay. The lower detection limits for eggs, larvae and nymphs were 28 pg for JH I and JH II and 980 pg JH III per g of tick tissue. For adults, the detection limits were 116 pg for JH I and JH II and 4069 pg JH III per g tissue. To date, JH has only been found in insects and only methyl farnesoate in the sister group to insects, the Crustacea. Finally, published work<sup>105</sup> does not support the hypothesis that ticks regulate egg development via JH<sup>106</sup> in *D. variabilis*; ecdysteroids initiated the synthesis of vitellogenin in *D. variabilis* but not JH III. Most evidence to date suggests that JH is not produced in ticks and that JH is not involved in tick metamorphosis and reproduction. The discovery of most of the farnesyl-PP (mevalonate) pathway and two enzymes, farnesol oxidase and methyl transferase, in the farnesal (insect JH) branch in both the *I. scapularis* genome and adult synganglion transcriptomes studied suggest these pathways are involved in reproduction at least and warrants future research in the potential role of these enzymes in the endocrinology and regulation of tick development.

### ***Ixodes scapularis* Heme Synthesis and Storage Protein Genes**

To identify genes coding for enzymes in the heme pathway, heme biosynthesis genes from a range of animals, fungi and prokaryotes, including multiple *Rickettsia* species were used in TBLASTX similarity searches of the *I. scapularis* assembly (ABJB010000000) and trace files and the REIS assembly<sup>10</sup>. Genes were manually annotated using Artemis software (v.11, Sanger Wellcome Trust) (Supplementary Table 20). To provide further support for functional predictions additional curation of each gene model was facilitated based on E.C. number. Putative hemelipoglyco-carrier protein (CP) genes were identified via TBLASTN search of the *I. scapularis* ISCW1 assembly at VectorBase using sequences from the tick, *D. variabilis*<sup>107</sup> and other invertebrates (Supplementary Table 22). Gene models were manually annotated using Artemis software v.8<sup>108</sup> and corresponding accession numbers were identified, where possible.

Adaptation to hematophagy has developed multiple times within the Arthropoda and even within a particular group such as the Diptera<sup>109,110</sup>. Despite the abundance of heme from the host hemoglobin, triatomine bugs (Order Hemiptera: Family Triatominae) apparently have the ability to synthesize heme as evident by the functional expression

of delta-aminolevulinic acid dehydratase, the rate limiting enzyme in the heme biosynthetic pathway<sup>111</sup>. However, investigators were unable to demonstrate heme biosynthesis in the southern cattle tick, *Rhipicephalus microplus*<sup>111</sup>. Several steps in the heme biosynthesis pathway were found in the *I. scapularis* genome (Supplementary Fig. 15; Supplementary Table 20). In the light of these findings, the question of the role of heme biosynthesis enzymes in the processing of host blood versus *de novo* heme synthesis should be re-examined. In addition, the importance of these processes compared to heme sequestration by unique heme-binding proteins in ticks as described below, requires further evaluation.

An important adaptation that co-evolved with blood feeding is heme sequestration by heme-binding proteins along with heme excretion, both of which prevent oxidative stress and tissue damage. Free heme results in reactive oxygen that leads to lipid peroxidation and cytotoxicity<sup>112</sup>. Heme is also important as a prosthetic group for respiration, enzymatic detoxification and oxygen transport<sup>113</sup>. In *Rhodnius prolixus*, host hemoglobin is digested to free heme which is then absorbed into the hemolymph and sequestered by a 15-kDa heme-binding protein (RHBP), reducing lipid peroxidation<sup>114,115</sup>. Other heme-binding proteins present in *R. prolixus* include nitrophorins for nitric oxide transport<sup>116</sup> and which have been implicated in host vasodilation during blood feeding. This suggests multiple uses for heme and heme binding proteins in blood feeding insects and possibly in other organisms like ticks.

Two storage proteins are found in tick hemolymph, a heme lipocarrier protein (CP) and the yolk protein (Vg), which share a common evolutionary origin<sup>107,117</sup>. These proteins have similar structural motifs that include the LPD\_N, the C-terminus vWD, the unknown function DUF1943 domain, cleavage sites (RXXR) and the GL/ICG domain (Supplementary Fig. 16). CP in hard ticks is found in both sexes and in all developmental stages and tissues studied. All CPs studied are composed of two subunits, 92 and ~100 kDa. Research suggests that the main source of CP mRNA in *D. variabilis* is the fat body and the salivary gland<sup>107</sup>. They also showed that host attachment and blood feeding initiated CP expression in virgin females while mating and feeding to repletion reduced the level of CP protein. Potentially, 10 CPs were found in the genome of *I. scapularis* (Supplementary Table 22), although all but one are incomplete gene models. This is by the far the greatest number of CPs found from a single tick species. It is not clear whether these genes are expressed, and if so, the importance of their protein products in tick physiology.

The regulation of full-length yolk protein messages was studied in the hard tick, *D. variabilis*. Studies showed that DvVg1 and DvVg2 are exclusively expressed in females after mating and feeding to repletion and are up-regulated by ecdysteroids not JH III. Both Vgs are not expressed in males (fed and unfed) or females before mating and feeding to repletion. The main source for DvVg1 and DvVg2 is the fat body and the gut cells. In the soft tick, *O. moubata*, studies have shown that the source of OmVg is the fat body and the gut and is regulated by ecdysteroids similar to the case in *D. variabilis*<sup>118</sup>. The same study observed a major difference between *D. variabilis* and *O. moubata*, where in the latter, Vg expression was initiated by engorgement in both virgin and mated females but increased further in mated females.

Multiple incomplete CP gene models and two Vg genes were identified in the genome of *I. scapularis* (Supplementary Table 22). The alignment of these sequences with homologous sequences from *D. variabilis* is shown in Supplementary Fig. 16. The

conceptual CP proteins are similar in amino acid length and have the characteristic domains (LPD\_N, DUF1943, vWD, RXXR and GLCG). The N-terminus sequence for the small subunit is FEVGKEYVY which is 100% identical to that determined for the *R. microplus* CP<sup>119</sup>. This sequence is directly downstream from the secretion signal and marks the start of the LPD\_N domain. The N-terminus of the larger subunit is DASAKERKEIED which has high sequence similarity to the *R. microplus* CP<sup>119</sup> and exists directly downstream from the only predicted cleavage site. The tick Vg genes contain three domains (LPD\_N, DUF1943 and vWD). Additionally, the RXXR cleavage site may be absent, as is the case for the *I. scapularis* Vgs, or variable in number and locations as observed for Vgs from other tick species. In ticks, Vg proteins typically consist of several subunits with variable N-terminus sequences while CPs consist of two subunits produced by only one RXXR cleavage site. We also found that all tick Vgs have an amino acid spacer (10-20 amino acids) between the secretion signal and the LPD\_N which does not exist in CPs. The high level of sequence similarity observed between tick CPs and Vgs complicates the characterization of these molecules.

### ***Ixodes scapularis* Blood Digestion Genes**

Unlike most other blood feeding arthropods, ticks digest the protein contents of a blood meal intracellularly in the epithelial cells of the midgut. Hemoglobin liberated from hemolyzed erythrocytes binds to clathrin-coated pits on the luminal sides of the midgut epithelial cells and is internalized by pinocytosis into large (3-12  $\mu$ m) endosomes (Fig 1D). Once inside the epithelial cells, the endosomes fuse with lysosomes to form specialized digestive vesicles. All hemoglobin digestion occurs intracellularly in these digestive vesicles and is carried out by a cascade of proteolytic enzymes, most functioning at acidic pH (3.5-4.5 pH, the pH optimum of the digestive vesicles). These enzymes selectively target different sites on the globin moieties, ending in dipeptides and free amino acids. The enzymatic steps previously described for *Ixodes ricinus*<sup>120</sup> are believed to be the same or similar in *I. scapularis*, since the same enzymes occur in the *I. scapularis* genome (Supplementary Table 21). Similar hemoglobinolytic enzymes have been found in other tick species<sup>121,122</sup>, indicating that this novel mode of hemoglobin digestion is widespread throughout the Ixodida.

Digestion of the globin moieties is initiated by the aspartic protease cathepsin D (the major hemoglobinase), assisted by the cysteine class endopeptidases cathepsin L and legumain. The action of these enzymes liberates heme and large (approximately 8 – 11 kDa) peptide fragments. In the next stage of the process, the large peptides are digested further by the cysteine amino cathepsin B and the cysteine carboxypeptidase cathepsin L, cleaving them further into smaller fragments, ~5-7 kDa. The third stage in the digestive process is carried by cathepsin C, assisted by Cathepsin B, resulting in small (approximately 3-5 kDa) peptides. The final stage in the process is completed by serine carboxypeptidases (SCP) and leucine aminopeptidases (LAP) resulting in dipeptides and free amino acids. The latter are transcytosed from the digestive cells into hemolymph. Heme liberated from the digestion of the parent molecule is transported from the digestive vesicles by heme-binding proteins to hemosomes, unique storage vesicles where the heme is detoxified by forming unique hematin-like aggregates<sup>123</sup>.

Hemoglobinolysis in ticks shows greater similarity to the enzymatic pathway in endoparasitic flatworms and nematodes than to blood feeding insects, although ticks are unique in carrying it out intracellularly within digestive vesicles of the midgut epithelium<sup>120,124,125</sup>.

### ***Ixodes scapularis* Metabolic Detoxification Genes**

*Ixodes scapularis* cytochrome P450 (CYP450) annotations (Supplementary Table 23) were produced from the JCVI version 0.5 (133 sequence pieces) and VectorBase version 0.5 (195 sequence pieces) gene model predictions. BLAST comparison of these two gene model sets was used to produce a set of 223 unique CYP450 sequences. DNA sequence for each P450 was recovered from the WGS section of NCBI and each gene was assembled manually based on comparison to the closest matches from other tick, mite and insect CYP450 sequences. EST searches were also used to confirm intron-exon boundaries and to extend partial gene models. Phylogenetic trees were constructed with the most closely related sequences to assign CYP names based on established CYP nomenclature. Comparison of *Ixodes* P450s to *Tetranychus urticae* showed only *Halloween* gene families CYP302, CYP307, CYP314, CYP315 and the 26-hydroxylase that degrades ecdysteroids CYP18 are conserved (Supplementary Fig. 17). CYP306 is missing in both species. Putative carboxylesterase (EC 3.1) and acetylcholinesterase (AChE)-like (EC. 3.1.1.7/3.1.1.8) genes were identified in the *I. scapularis* genome sequence by TBLASTN search of scaffolds at NCBI (Supplementary Table 24). Gene models were manually annotated using Artemis v.8<sup>108</sup> and the putative function of conceptual protein sequences was predicted based on protein sequence homology to invertebrate and vertebrate protein sequences. To identify divergent members of the carboxylesterase gene family, reciprocal TBLASTN searches were conducted against the ISCW1.1 assembly using the predicted *I. scapularis* carboxylesterase and AChE-like protein sequences.

Two hundred and six CYP genes and six pseudogenes were identified in the *I. scapularis* genome (Supplementary Table 23). Ninety-one additional fragments were also identified that were too short to name; some of these fragments may represent pseudogenes. This finding represents the largest number of CYP genes identified in any animal to date. The *I. scapularis* CYP18, CYP302, CYP307, CYP314 and CYP315 gene products may be involved in ecdysteroid metabolism, based on the function of orthologous genes in other invertebrates. The function of the remaining *I. scapularis* P450s is unclear. By comparison, the body louse, *P. humanus*, which like *I. scapularis* is also exclusively hematophagous, has only 36 CYP genes. It is unlikely that the large number of *I. scapularis* P450 genes reflects a need to detoxify blood components such as heme. One possible explanation for the expanded number of CYP450s in *I. scapularis* is exposure to plant toxins secreted as oils by plant trichomes. *Ixodes scapularis* spends much of its life cycle off host and may be exposed to a wide variety of plant chemicals, especially as it exploits vegetation in order to locate and transfer to its animal hosts.

A total of 75 putative carboxylesterase/AChE-like genes, 11 putative pyrethroid metabolizing carboxylesterases with sequence similarity to the *R. microplus* CzEST9 gene which is associated with pyrethroid resistance in the cattle tick<sup>126</sup>, and two putative juvenile hormone esterases were identified in the *I. scapularis* assembly (Supplementary Table 24). Analyses suggest that the majority of these gene models

represent complete or near complete CDS. However, some sequences listed in Supplementary Table 24 likely represent one or more exons of incomplete gene models. Further annotation, coupled with wet lab analyses will ultimately resolve the final number of carboxylesterase-like genes in the tick. Of note, many members of the carboxylesterase-like gene family are located on the same scaffold, with two extreme cases being scaffolds DS818569 and DS921995, both of which contain ten putative carboxylesterase gene models. This finding suggests significant tandem duplications, a phenomenon commonly associated with this gene family.

### ***Ixodes scapularis* Neuropeptide Genes**

Identification of the neuropeptide genes was based on Blast searches utilizing gene sequences available in VectorBase. Where possible, additional evidence for some of these neuropeptides derived from transcriptomes; immunohistochemistry data for other ixodid tick species was also included, further supporting their functional assignment.

A search of the *I. scapularis* genome for neuropeptides and neuropeptide receptors of the classical invertebrate neuroendocrine system revealed the presence of at least 39 canonical neuropeptide genes (Supplementary Tables 25-28). Twelve additional novel putative neuropeptide genes were identified from their tandem repeats with conserved C-terminal sequences including the canonical sequences for amidation and dibasic (or monobasic) cleavage signals (Supplementary Table 25). Canonical predicted neuropeptides include multiple allatostatins, myoinhibitory peptides, allatotropin, bursicon  $\alpha$ , bursicon  $\beta$ , crustacean cardioactive peptide, CCH, corazonin, diuretic hormone, FMRFamides, eclosion hormone, glycoprotein hormone  $\alpha/\beta$ , insulin-like peptide, neuroparsin (insulin-like growth factor binding protein or IGFBP), ion-transport peptide, orcokinin, sulfakinin, prothoracicotropic hormone (PTTH)-like hormone, proctolin, pyrokinins, periviscerokinin, SIFamide and tachykinin.

Ticks are chelicerates, a subphylum that evolved more than 500 million years ago<sup>127</sup>, and are evolutionarily distinct from the insects and crustacea. Ixodid ticks are unique among blood feeding arthropods in their ability to feed for long periods, create additional cuticle to accommodate enormous blood meals, and remove excess blood meal water via their salivary glands. Blood feeding also stimulates development and reproductive functions. Here we review genes for neuropeptides believed essential to these processes. Among the most abundant of these neurohormones is allatostatin (Type A). The gene ISCW022937, a likely ortholog of the cockroach allatostatin precursor (AAC72892), was found in the tick genome database, but its function has not been determined. Three copies of the gene for an allatostatin receptor were also identified. Allatotropin and allatostatins regulate production of juvenile hormone (JH) in insects and may have additional functions as well; however, there is no conclusive evidence of JH in ticks<sup>104</sup>. Consequently, the function of these peptide hormones and/or their receptors in ticks is enigmatic. Evidence of allatostatin mRNA was found in the synganglion of the dog tick, *D. variabilis*<sup>128</sup> and *I. scapularis*<sup>129</sup>, suggesting that this hormone and its receptor may be conserved throughout the Ixodida. The gene for allatotropin was found in the *I. scapularis* genome and evidence of a transcript predicting its occurrence in the synganglion of adult *I. scapularis* was reported<sup>129</sup> and also demonstrated by immunohistochemistry in *Rhipicephalus appendiculatus*<sup>130</sup>. These peptides may also have other regulatory functions. In insects, allatotropin was shown to

stimulate the foregut muscles, whereas allatostatin was found to inhibit contractions of the foregut, and, as a result, suppressed feeding activity<sup>131</sup>. Consequently, the role of these genes in *I. scapularis* awaits further biochemical and molecular studies.

Genes associated with the ecdysial process were found, including corazonin, eclosion hormone, CCAP, and bursicon ( $\alpha$  and  $\beta$ ). In addition to the complete gene model of corazonin in the *I. scapularis* genome, ESTs matching corazonin and the corazonin receptor were identified in an unpublished synganglion cDNA library from adult female *D. variabilis*<sup>128</sup>; and this neuropeptide was also detected in unfed adult female *R. appendiculatus* by immunohistochemistry<sup>130</sup>. Similarly, a match for eclosion hormone (ISCW001941) to a conserved hypothetical *I. scapularis* protein (NCBI XM\_002399230) was found. Expression of these hormones and/or hormone receptors was reported in adult female *D. variabilis* by 454 pyrosequencing<sup>128</sup>. Genes for both bursicon  $\alpha$  and bursicon  $\beta$  were identified. Transcripts for both bursicon subunits were also found in the synganglion of feeding adult female *D. variabilis*<sup>128</sup>. Bursicon is an approximately 30 kDa, highly conserved molecule in insects where it functions in wing expansion (in *Drosophila*) and as a cuticle-hardening (tanning hormone) regulator<sup>132</sup>. Although adult female ixodid ticks do not molt again after nymphal eclosion, they do secrete new cuticle during feeding and it is likely that these genes contribute to hormonal regulation of cuticle hardening and tanning.

Insulin-like peptide (ILP), a member of the insulin superfamily, is a highly conserved gene that is widespread among multiple taxa. Following transcription, it is translated as a preprohormone. In insects, following cleavage of the signal peptide, the mature proteins containing the characteristic A, B, and C-chain peptides are stored in secretory granules. Subsequently, the C peptide is removed by convertase. Genes for preproconvertase (ISCW020499) and IGFBP (ISCW003285) were found in the *I. scapularis* genome, suggesting the existence of an insulin signaling pathway. Insulin-like signaling activity is believed to regulate development, longevity, metabolism, and female reproduction<sup>133</sup> as well as ecdysteroidogenesis<sup>134</sup>. Silencing IGFBP (by RNA interference) prevented blood-feeding females from feeding to repletion, indicating the role of this protein in regulating feeding in ticks<sup>135</sup>. ILP mRNA was found in the transcriptome of the female *D. variabilis* synganglion and ILP immunoreactivity has been identified in other tick species<sup>130,136</sup>. ILP is believed to be secreted from neurosecretory sites in the periganglionic sheath into the periganglionic sinus and thereupon into general circulation.

Orcokinins and sulfakinins are believed to be important in regulating contractions of the digestive tract in insects and are likely to play a similar role in *I. scapularis*. Orcokinins increase gut contractions, presumably enhancing feeding activity, whereas sulfakinins inhibit feeding activity. At least one orcokinin gene and two sulfakinin isoforms were identified in the genome. Transcripts of four orcokinins, a preprosulfakinin and a sulfakinin receptor were found in the transcriptome of the female *D. variabilis* synganglion<sup>128</sup>. Sulfakinins show homology to cholecystokinins, which are believed to function as satiety inducing peptides<sup>137</sup>. We hypothesize that the sequential up or down regulation of these genes following mating induces rapid blood feeding to repletion.

Several genes were found that are important in regulating salivary gland function. In addition to dopamine, long known as a secretory agonist<sup>138</sup>, myoinhibitory peptide (allatostatin B) and SIFamide peptide were identified in the *I. scapularis* genome. These peptides were also identified in neurosecretory cells and their axonal projections leading

to the salivary glands by immunohistochemistry indicating their importance in regulating the function of these glands<sup>139</sup>.

Several other neuropeptides have been identified in *I. scapularis*, e.g., allatostatin-C, proctolin, pyrokinin-2, pyrokinin-3, pyrokinin-4, and periviscerokinin<sup>140,141</sup>. In addition, periviscerokinin was identified in *I. ricinus* and *R. microplus* by MALDI-TOF/TOF mass spectrometry<sup>142</sup>.

### ***Ixodes scapularis* G-protein Coupled Receptor (GPCR) Genes**

Putative *I. scapularis* GPCRs were identified by TBLASTN searches of the tick genome assembly at VectorBase (<https://www.vectorbase.org/>). The primary source of query sequences included GPCRs from the mosquitoes *An. gambiae*<sup>143</sup> and *Ae. aegypti*<sup>144</sup> and the fruitfly *D. melanogaster* (FlyBase; <http://flybase.org/>), while additional invertebrate and vertebrate GPCR sequences were used when appropriate. Identified GPCRs were used to iteratively search the *I. scapularis* genome for additional GPCR sequences. Alignments of conceptual GPCR amino acid sequences were conducted with ClustalW or MultAlin software (<http://bioinfo.genotoul.fr/multalin/multalin.html>). GPCRs were categorized according to class and family based on sequence similarity to invertebrate and mammalian GPCRs and named according to nomenclature guidelines developed for invertebrate vectors as detailed at VectorBase (Supplementary Table 26). GPCR annotations described in this publication will be made available as third party annotations through VectorBase. Full length cDNAs of the following putative receptors were cloned and NCBI accession numbers were obtained as follows: Family A: 1. Kinin receptor (HM807526), 2. Periviscerokinin/CAPA receptor (JQ771528), 3. Orphan neuropeptide receptor (HM771426); Family B: Corticotropin-releasing hormone-like (CRF-like) receptor 2a (JF837597).

### ***Ixodes scapularis* Chemosensory Ligand-Binding Protein Gene Families**

The search for putative homologs of the odorant-binding protein (OBP), chemosensory protein (CSP) and chemosensory protein family B (CheBs) genes was conducted as previously described<sup>145</sup>, and included several rounds of exhaustive searches using information from known protein sequences as queries<sup>146,147,148,149,150,151,152</sup>. First, we searched the preliminary predicted gene set using BLASTP (BLOSUM45 matrix with an e value threshold of  $10^{-5}$ ), HMMER (<http://hmm.wustl.edu/>) (e value domain threshold of  $10^{-5}$ ), and HHsearch<sup>153</sup> (e-value threshold of  $10^{-5}$ ). The HMMER and HHsearch searches used Pfam<sup>154</sup>, PBP/GOBP (for OBP; PF01395), and OS-D (for CSP; PF03392), lipocalin (for vertebrate OBP; PF00061) HMM profiles. Furthermore, because some chemosensory family members are highly divergent, we also built extra custom HMM profiles (used in all HMMER and HHsearch searches). In the case of CheBs we used the members of the family recently identified and characterized by the J. Rozas group in the 12 *Drosophila* genomes. We built these profiles after clustering known protein sequences representative of all relevant phylogenetic groups with BlastClust (<ftp://ftp.ncbi.nih.gov/genomes>) (e value threshold of  $10^{-5}$ , length coverage “-L” of 0.5 and score density “-S” of 0.6). We selected the four clusters with the highest numbers of sequences, aligned the clusters separately with MAFFT<sup>155</sup> (E-INS-i with BLOSUM30 matrix, 10,000 maxiterate, and offset “0”) and, for each cluster, built an HMM profile using HMMER. Second, we searched the raw DNA sequence data using TBlastN (BLOSUM45 with e value threshold of  $10^{-3}$ ),

EXONERATE<sup>22</sup> (50% of the maximum store threshold), and HMMER (e value domain threshold of  $10^{-10}$ ). For the latter analysis, we searched against all 6-frames using Pfam's and our custom HMM profiles as queries. All searches were performed exhaustively until no new hit was found, adding always all newly identified members to the queries. Finally, all results were manually curated, and the putative gene structure was checked for known OBP/CSP/CheB characteristics (signal peptide, typical secondary structures, presence of start and stop codons, etc).

### ***Ixodes scapularis* Gustatory Receptor (GR) Genes**

The GR family was manually annotated using methods employed for insect and *Daphnia* genomes<sup>156</sup>. Briefly, TBLASTN searches were performed using major lineages of insect and *Daphnia* GRs as queries, and gene models were manually assembled in TEXTWRANGLER. Iterative searches were also conducted with each new tick protein as query until no new genes were identified in each major subfamily or lineage. Many of the genes identified are missing one or more short C-terminal exons, and while some of these were identified from raw reads, leading to fixed gene models, many were not. A final check for possible divergent genes/proteins was performed by HMMER at VectorBase using the automated annotations, and revealed nine existing models and just two additional highly divergent genes/proteins, Gr47 and 62. All of the IsGr genes and encoded proteins are detailed in Supplementary Table 29. All IsGr proteins are provided below in FASTA format.

The IsGr gene set consists of 62 models, comparable in size with that of many insects and *Daphnia*. There were only five obvious pseudogenes, although some of the currently incomplete gene models might in fact be pseudogenes, and there are many gene fragments remaining in the genome. Gene models were present in the automated annotations for just 11 of these genes, and only one was precisely correct. For the genes that are intact within existing supercontigs, 23 new models have been added to the annotation, indicated with numbers starting with 800 in Supplementary Table 29. Although there are no ESTs for these Grs in the limited available transcriptome data, the basic gene structure for the entire IsGr set is a long first exon, followed by three short C-terminal exons separated by three phase 0 introns. The locations of these introns and their phases are the same as predicted by<sup>157</sup> to be ancestral to the entire insect chemoreceptor superfamily, and are also shared with Gr genes in other animals (Robertson, *unpublished*). The only major exception is the Gr47-60 lineage, which are intronless in the coding region, presumably resulting from an ancient gene conversion with a reverse-transcribed mRNA.

**Phylogenetic Analysis of the *Ixodes scapularis* GRs.** GR protein sequences of *D. melanogaster*, *An. gambiae*, *D. pulex* and *I. scapularis* were aligned with MAFFT using standard parameters (gap opening penalty = 1.530 and offset = 0.123) and 1000 iterations. Phylogenetic analysis was performed with the RAXML 7.0.4<sup>158</sup> software using the PROTGAMMAWAG model. Tree figure (Supplementary Fig. 20) was edited with FigTree 1.3.1 (<http://tree.bio.ed.ac.uk/software/figtree>).

### ***Ixodes scapularis* Cys-loop and iGluR Ligand-gated Ion Channel Genes**

iGluR and IR genes were identified and annotated using previously described methods<sup>159</sup> (Supplementary Fig. 21; Supplementary Tables 30-31).

### **MicroRNAs (miRNAs) in *Ixodes scapularis***

Three different sets of microRNA (miRNA) gene predictions were consolidated from miRBase<sup>160</sup>, miROrtho<sup>161</sup>, and VectorBase<sup>162</sup> resulting in the identification of a conservative set of 45 predicted miRNA genes (Supplementary Table 6). These include likely orthologs of recognized miRNAs such as *bantam* and *iab-4*. Although this set of miRNAs is unlikely to be complete, it is comparable in number to predictions from other arthropod genomes: e.g., 52 in the genome of the spider mite, *T. urticae*<sup>163</sup>, 50 in the water flea, *D. pulex*<sup>34</sup>, and 57 in the body louse, *P. humanus*<sup>164</sup>.

### ***Ixodes scapularis* Proteomics**

*Ixodes scapularis* ISE6 cells (provided by Timothy J. Kurtti, University of Minnesota) were grown at 34°C in the absence of CO<sub>2</sub> with L15B-300 complete media<sup>165</sup>. Cells were harvested followed by lipid removal (CHCl<sub>3</sub>: MeOH), acetone protein precipitation and denaturation. The protein samples were digested with trypsin and the resulting peptides were analyzed by high-pressure liquid chromatography (HPLC) and ESI-MS/MS with a hybrid ion trap mass spectrometer LTQ-Orbitrap LX (Thermo Scientific) at the Purdue Proteomics Facility, Bindley Bioscience Center. Mass spectrometry (MS) data were processed using with the Omics Discovery Pipeline<sup>166,167</sup> and MS/MS peptide identification was performed using the Agilent Technologies Spectrum Mill MS Proteomics Workbench. The *I. scapularis* Wikel strain IscaW1.2 predicted protein set (<https://www.vectorbase.org/>) was used to perform the MS/MS protein database search and reverse scores were calculated to account for decoy database searching. Significant LC-MS peaks ( $p \leq 0.05$ ) discovered by the Omics Discovery Pipeline were matched to corresponding m/z values and retention times of a MS/MS peptide library (identified from Spectrum Mill). These identified peptides were subject to filtering by removing non-confident peptides and false positives<sup>168,169</sup>. This stringent analysis produced a final data set comprising approximately 486 proteins. This data set was queried to provide support for *I. scapularis* heme biosynthesis gene model predictions (Section S8).

### ***Ixodes* Proteins Associated With *Anaplasma* Infection**

**Cell Culture and Protein Extraction.** The tick cell line ISE6, derived from *I. scapularis* embryos (provided by U.G. Munderloh, University of Minnesota, USA), was cultured in L15B medium as described previously<sup>170</sup>, but the osmotic pressure was lowered by the addition of one fourth sterile water by volume. The ISE6 cells were inoculated with *A. phagocytophilum* (NY18 isolate)-infected HL-60 cells as described previously<sup>170,171</sup>. Uninfected and infected cultures (N=5 independent cultures each) were sampled at 3 days post-infection (dpi) (early infection; percent infected cells 11-17% (Avg±SD, 13±2)) and 10 dpi (late infection; percent infected cells 56-61% (Avg±SD, 58±2)), the cells were centrifuged at 10,000 g for 3 min, and cell pellets were frozen in liquid nitrogen until used for protein extraction. Approximately 10<sup>7</sup> cells were pooled from each condition and lysed in 350 µl lysis buffer (PBS, 1% Triton X-100, 1 mM sodium vanadate, 1 mM sodium fluoride, 1 mM PMSF, 1 µg/ml leupeptin, 1 µg/ml pepstatin) for 30 min at 4°C. Total cell extracts were centrifuged at 200 g for 5 min to remove cell debris. The supernatants were collected and protein concentration was

determined using the Bradford Protein Assay (Bio-Rad, Hercules, CA, USA) with BSA as standard.

**Proteomics analysis of infected and uninfected *Ixodes scapularis* ISE6 tick cells.** Proteomics analysis of *I. scapularis* ISE6 tick cells in response to *A. phagocytophilum* infection was performed using protein one-step in-gel digestion, peptide iTRAQ labeling, IEF fractionation, LC-MS/MS analysis and peptide identification. Protein extracts from the four experimental conditions, control uninfected early (CE), infected early (IE), control uninfected late (CL) and infected late (IL) (100 µg each) were resuspended in up to 300 µl of sample buffer and applied using a 5-well comb on a conventional SDS-PAGE gel (1.5 mm-thick, 4% stacking, 10% resolving). The run was stopped as soon as the front entered 3 mm into the resolving gel so that the whole proteome became concentrated in the stacking/resolving gel interface. The unseparated protein bands were visualized by Coomassie Brilliant Blue R-250 staining, excised, cut into cubes (2 mm<sup>2</sup>) and digested overnight at 37°C with 60 ng/µl trypsin (Promega, Madison, WI, USA) at 5:1 protein:trypsin (w/w) ratio in 50 mM ammonium bicarbonate, pH 8.8 containing 10% (v/v) acetonitrile (ACN) and 0.01% (w/v) 5-cyclohexyl-1-pentyl-β-D-maltoside (CYMAL-5)<sup>172</sup>. The resulting tryptic peptides from each proteome were extracted by 1 hr incubation in 12 mM ammonium bicarbonate, pH 8.8. trifluoroacetic acid (TFA) was added to a final concentration of 1% and the peptides were finally desalted onto C18 OASIS HLB Extraction cartridges (Waters, Milford, Massachusetts, USA) to remove the amine-containing buffers and dried-down.

Dried peptides were taken up in 30 µl of iTRAQ dissolution buffer provided with the kit (Applied Biosystems, Madrid, Spain) and labeled by adding 70 µl of the corresponding iTRAQ reagent in ethanol and incubating for 1 hr at room temperature in 70% ethanol, 180 mM triethylammoniumbicarbonate (TEAB), pH 8.53. CE was labeled with 114, IE was labeled with 115, CL was labeled with 116 and IL labeled with 117 iTRAQ tags. After quenching the reaction with 100 µl 0.1% formic acid for 30 min, samples were brought to dryness to completely stop the labeling reaction. This quenching process was repeated once more to promote TEAB volatilization. The four labeled samples were resuspended in 100 µl 0.1% formic acid and combined into one tube. The mixture was dried down, redissolved in 3.3 ml 5 mM ammonium formate, pH 3, cleaned up with SCX Oasis cartridges (Waters) using as elution solution 1 M ammonium formate pH 3, containing 25% ACN, and dried down. The peptide pools were resuspended in 0.5 ml 0.1% TFA, desalted onto C18 Oasis cartridges using as elution solution 50% ACN in 5 mM ammonium formate, pH 3 and dried down. The sample was taken up in focusing buffer (5% glycerol and 2% IPG buffer pH 3-10 (GE Healthcare, Madrid, Spain) loaded onto 24-wells over a 24 cm-long Immobiline DryStrip, pH3-10 (GE Healthcare) and separated by IEF on a 3100 OFFgel fractionator (Agilent, Santa Clara, CA, USA), using the standard method for peptides recommended by the manufacturer. The recovered fractions were acidified with 20 µl of 1 M ammonium formate, pH 3, and the peptides were desalted using OMIX C18 tips (Varian, Palo Alto, CA, USA). After elution with 50% ACN in 5 mM ammonium formate, pH 3, the peptides were dried-down prior to RP-HPLC-LIT analysis. All samples were analyzed by LC-MS/MS using a Surveyor LC system coupled to a linear ion trap mass spectrometer model LTQ (Thermo-Finnigan, San Jose, CA, USA) as described previously<sup>173</sup>. The LTQ was programmed to perform a data-dependent MS/MS scan on the 15 most intense precursors detected in a full scan from 400 to 1600 amu (3 µscans, 200 ms

injection time, 10,000 ions target). Singly charged ions were excluded from the MS/MS analysis. Dynamic exclusion was enabled using the following parameters: 2 repeat counts, 90 s repeat duration, 500 exclusion size list, 120 s exclusion duration and 2.1 amu exclusion mass width. PQD parameters were set at 100 ms injection time, 8 microscans per scan, 2 amu isolation width, 28% normalized collision energy, 0.6 activation Q, 0.3 ms activation time. For PQD spectra generation 10,000 ions were accumulated as target and automatic gain control was used to prevent over-filling of the ion trap. Protein identification was carried out as described previously<sup>173</sup> using SEQUEST algorithm (Bioworks 3.2 package, Thermo Finnigan), allowing optional (Methionine oxidation) and fixed modifications (Cysteine carboxamidomethylation, Lysine and N-terminal modification of +144.1020 Da). The MS/MS raw files were searched against the alphaproteobacteria combined with the arachnida Swissprot database (Uniprot release 15.5, 7 July, 2009) supplemented with porcine trypsin and human keratins. This joint database contains 638,408 protein sequences. To calculate false discovery rate, the same collections of MS/MS spectra were also searched against inverted databases constructed from the same target databases. The alphaproteobacteria Swissprot database was used to identify and discard *Anaplasma* and possible symbiotic bacterial sequences from further analyses.

A total of 1447 MS/MS spectra were assigned to 903 unique peptides<sup>174</sup> (false discovery rate, FDR=10%). After identifying and discarding *Anaplasma* and other bacterial symbiotic peptide sequences, the 735 remaining peptides belonged to 424 different proteins (Supplementary Tables 32-35). Of these, 88% had similarity to *Ixodes* sequences while 95% had similarity to sequences from other tick species (Supplementary Table 35). Proteomics data showed a strong correlation with conceptual coding sequences predicted from the *I. scapularis* genome. For some of the identified proteins, the discrepancy between peptide data and predicted protein sequence may reflect polymorphisms between ISE6 cells and the Wikel tick strain and the need to improve *I. scapularis* gene models.

## **Population Structure of *Ixodes scapularis* Across North America**

### ***Sample collection***

*Ixodes scapularis* adult females were collected from eight geographical locations in the USA: Florida, Indiana, Maine, Massachusetts, New Hampshire, North Carolina, Virginia, and Wisconsin by our research group or kindly provided by collaborators. In addition, samples were obtained for the reference Wikel strain from the University of Texas Medical Branch, Galveston, TX. The colony has been maintained in continuous culture since establishment. The GPS location was recorded for each field collected sample. Samples were stored in 80% ethanol at 4°C, in ALT buffer (SIGMA) or at -70°C until processing. Genomic DNA was separately extracted from individual females using a phenol:chloroform:isopropyl alcohol (SIGMA) method and treated with RNase A (Ambion).

### ***RAD library preparation***

RAD-seq libraries were produced from 77 individual female *I. scapularis*. One µg genomic DNA from each individual was digested in a 50 µL reaction with 100 units of *Sbf*I-HF restriction enzyme (New England Biolabs, Beverly MA, USA) for 1.5 hrs at

37°C, followed by incubation at 65°C for 20 minutes to inactivate the enzyme. An aliquot (1 µl) was analyzed on 1% agarose gel to check the digestion efficiency and the remaining product was ligated to the unique P1 RAD adapter primers (50 nM per reaction) with 1000 units of T4 ligase in 1× NEB buffer 2 (New England Biolabs) and 100 mM rATP (Fermentas). Samples were incubated for one hr at 20°C, followed by enzyme inactivation at 65°C for 20 minutes. Adapter ligated DNA fragments from individual samples were pooled and sonicated using Qsonica sonicator for six minutes at maximum power. Samples were cleaned with MinElute PCR purification kit (Qiagen). Fragments of 400-600 bp were selected using 1% agarose gel and DNA was recovered with the MinElute gel extraction kit (Qiagen). Blunt ends were repaired using blunting enzyme mix (New England Biolabs) in 1X blunting buffer and 1mM dNTP mix. Samples were incubated for one hr at 20°C and purified with MinElute PCR purification kit (Qiagen). A-overhangs (10mM dATP; Fermentas) were then added using Klenow fragment (3'-5' exo) (New England Biolabs) in 1x NEB Buffer 2. Samples were incubated for one hr at 20°C and purified with MinElute PCR purification kit (Qiagen). The P2 RAD adapter (10 µM) was ligated using 1000 units of T4 DNA ligase (New England Biolabs) in 1× NEB buffer 2 (New England Biolabs) and 100mM rATP (Fermentas). Samples were incubated for one hr at 20°C followed by purification with MinElute PCR purification kit (Qiagen).

Finally, 10 µL of the P1 and P2 adapter ligated DNA was used as a template in a 100 µL PCR reaction with 50 µL of the Phusion High Fidelity 2× Master mix (New England Biolabs) and 2 µL each of 10 µM P1 and P2 primers. PCR conditions were: 98°C for 30 s, 14 cycles of 98°C for 10 s, 65°C for 30 s, 72°C for 30 s, and a final elongation step at 72°C for 5 min. Samples were sequenced on the Illumina HiSeq2500 platform in the Rapid run mode to obtain 150 bp single-end reads.

### **Sequence processing and SNP calling**

Illumina reads were processed by the Bioinformatics Core at Purdue University. Reads were corrected for barcodes and restriction site, low quality bases (Phred score less than 10) were trimmed and all reads were trimmed to 140 bp and then de-multiplexed (sorted by barcode) using the “process\_radtags.pl” script of STACKS<sup>175,176</sup>. Quality trimmed reads were separately aligned to the *I. scapularis* Wikel genome assembly, IscaW1 (Ixodes-scapularis-Wikel\_SCAFFOLDS\_IscaW1.fa downloaded from VectorBase) using the end-to-end mode and default parameters of Bowtie2 v 2.2.3<sup>177</sup>. Three individual samples with the percent of mapped reads less than 50% were removed from analysis. Polymorphic loci (catalogue loci) were identified for SNP discovery using the ref\_map.pl pipeline in STACKS version (v1.19). First, sequences aligned to the same genomic location were stacked together and merged to form loci. Only loci with a sequencing depth of ten or more reads per individual were retained. SNPs at each locus were called by STACKS implementing a multinomial-based likelihood model regardless of the reference sequence itself. Lastly, a catalogue of all possible loci and alleles was generated and each individual was matched against the catalogue. In total, 745,760 SNPs across 35,460 loci were identified using the ‘population’ program within the STACKS package based on the criteria: (1) minimum 60% individuals within a population, (2) minimum two populations to report a locus, and (3) minimum stack depth of 10 per locus.

### ***F-statistics and Population structure***

The *population* program within STACKS (v1.19) was used<sup>176</sup> in combination with the system of Wright<sup>178</sup> to assess fixation index and genetic variation within and among populations. The *F* statistic was used to measure fixation index ( $F_{IS}$ ) and genetic variability ( $F_{ST}$ ). Using 745,760 SNPs, genome-wide measures of diversity, such as observed heterozygosity ( $H_O$ ), expected heterozygosity ( $H_E$ ), nucleotide diversity ( $\pi$ ) across individuals (intra-population) and genetic differentiation were calculated to assess genetic distance or differentiation as evidence of selection. We enabled kernel smooth function in *population* with a default window size of 150kb such that a kernel smooth function (weights function) was applied to all SNP locations within a sliding window covering a 3x150 Kb region at either side of a center polymorphic locus. This function uses the distance between each SNP within the sliding window and the center SNP, and the defined window size, so that  $F_{IS}$  have stable values within each sliding window and across the whole genome. The same process was conducted for  $\pi$ . At each SNP locus,  $\pi$  was calculated from the count of a specific allele in the population, and the sample size of all alleles in the population<sup>179,180</sup>. At each SNP location,  $F_{IS} = 1 - H_O/\pi$ . The reported  $F_{IS}$  (Supplementary Table 36) is the population-level mean value across all the polymorphic sites within each sub-population.

$F_{ST}$  is an indication of variation among populations. At each SNP position,  $F_{ST}$  was calculated by the following formula<sup>176,180,181</sup>:

$$F_{ST} = 1 - \frac{\sum_j \binom{n_j}{2} \pi_j}{\pi_{all} \sum_j \binom{n_j}{2}}$$

where,  $n_j$  is the sample size of alleles in population  $j$ , and  $\pi_j$  is  $\pi$  in population  $j$ , while  $\pi_{all}$  is  $\pi$  calculated over the pair of populations (pairwise comparison between two sub-populations) (Supplementary Table 37).

In addition, we used *fastStructure* (beta release)<sup>182</sup> to assess population structure using a genome wide set of 745,760 SNPs across 35,460 catalogue loci (~21 SNPs per loci) and a subset of 34,693 SNPs, the first SNP per catalogue locus to resolve genetic structure at a broad spatial scale. *fastStructure* delineates clusters of individuals on the basis of genotypes at multiple loci using a Bayesian approach. Models were fitted with a defining number of clusters ( $K$ ) from 1 to 20. Next, the most suitable  $K$  ( $K=6$ ) was selected for the full set of 745,760 SNPs using a python script chooseK.py from *fastStructure*. Briefly, marginal likelihood values for  $K=1$  to 20 were manually vetted. Marginal likelihood increased from -0.4730 to -0.3882 when  $K$  increased from 1 to 6, and then decreased by 0.01 at  $K=7$  (range -0.3953 to -0.3825). The same method was used to select the most suitable  $K$  ( $K=5$ ) for the subset of 34,693 SNPs. Marginal likelihood increased from -0.4975 to -0.4004 when  $K$  increased from 1 to 5, then decreased to -0.4045 at  $K=6$  reaching a plateau afterwards. Using the output from *fastStructure* and *DISTRUCT* (v1.1)<sup>183</sup>, a bar plot was created where each individual of the sample is represented by a vertical line divided into  $K$  colored segments with the length of each segment being proportional to the estimated membership in each of the inferred  $K$  groups.

### **Expression of *Ixodes scapularis* ligand-gated ion channels in *Xenopus laevis* oocytes**

Functional expression of an *Ixodes scapularis* ligand-gated ion channel subunit (known as IscaGluCl1) in *Xenopus laevis* oocytes (Fig. 7; Supplementary Fig. 25) was achieved by cRNA injection and two-electrode voltage clamp electrophysiology. A brief description of the methods is provided in the main paper and a more comprehensive account of the technique is available<sup>184</sup>.

## Supplementary References

1. Geraci, N. S., Johnston, J. S., Robinson, J. P., Wikel, S. K. & Hill, C. A. Variation in genome size of argasid and ixodid ticks. *Insect Biochem. Mol. Biol.* **37**, 399-408 (2007).
2. Hill, C. A. *et al.* The position of repetitive DNA sequence in the southern cattle tick genome permits chromosome identification. *Chromosome Res.* **17**, 77-89 (2009).
3. Myers, E. W. *et al.* A whole-genome assembly of *Drosophila*. *Science* **287**, 2196-2204 (2000).
4. Rusch, D. B. *et al.* The Sorcerer II Global Ocean Sampling Expedition: Northwest Atlantic through Eastern Tropical Pacific. *PLoS Biol* **5**, e77 (2007). doi:10.1371/journal.pbio.0050077.
5. Levy, S. *et al.* The diploid genome sequence of an individual human. *PLoS Biol.* **5**, e254 (2007). doi:10.1371/journal.pbio.0050254.
6. Denisov, G. *et al.* Consensus Generation and Variant Detection by Celera Assembler. *Bioinformatics* **24**, 1035-1040 (2008).
7. Miller, J. R. *et al.* Aggressive Assembly of Pyrosequencing Reads with Mates. *Bioinformatics* **24**, 2818-2824 (2008).
8. Gillespie, J. J. *et al.* PATRIC: The Comprehensive Bacterial Bioinformatics Resource with a Focus on Human Pathogenic Species. *Infect. Immun.* **79**, 4286-4298 (2011).
9. Kurtti, T. J. *et al.* *Rickettsia buchneri* sp. nov., a rickettsial endosymbiont of the blacklegged tick *Ixodes scapularis*. *Internat. J. System. Evol. Microbiol.* **65**, 965-970 (2015).
10. Gillespie, J. J. *et al.* A *Rickettsia* genome overrun by mobile genetic elements provides insight into the acquisition of genes characteristic of an obligate intracellular lifestyle. *J. Bacteriol.* **194**, 376-394 (2012).
11. Price, A. L., Jones, N. C. & Pevzner, P. A. *De novo* identification of repeat families in large genomes. *Bioinformatics* **21**, i351-8 (2005). doi:10.1093/bioinformatics/bti1018.
12. Bao, Z. & Eddy, S. R., Automated *de novo* identification of repeat sequence families in sequenced genomes. *Genome Res.* **12**, 1269-1276 (2002).
13. Smit, A. F. A., Hubley, R. & Green, P. *RepeatMasker Open-3.0*. 1996-2010. <<http://www.repeatmasker.org>>.
14. Huang, X., Adams, M. D., Zhou, H. & Kerlavage, A. R. A tool for analyzing and annotating genomic sequences. *Genomics* **46**, 37-45 (1997).
15. Birney, E., Clamp, M. & Durbin, R., GeneWise and Genomewise. *Genome Res.* **14**, 988-995 (2004).
16. Haas, B. J. *et al.* Improving the *Arabidopsis* genome annotation using maximal transcript alignment assemblies. *Nucl. Acids Res.* **31**, 5654-5666 (2003).

17. Stanke, M. & Morgenstern, B. AUGUSTUS: a web server for gene prediction in eukaryotes that allows user-defined constraints. *Nucl. Acids Res.* **33**: W465-W467 (2005). doi:10.1093/nar/gki458.
18. Majoros, W., Pertea, M., Delcher, A. L. & Salzberg, S. L. Efficient decoding algorithms for generalized hidden Markov model gene finders. *BMC Bioinformatics* **6**, 16 (2005). doi:10.1186/1471-2105-6-16.
19. Haas, B. J. *et al.* Automated eukaryotic gene structure annotation using EVIDENCEModeler and the Program to assemble spliced alignments. *Genome Biol.* **9**, R7 (2008). doi:10.1186/gb-2008-9-1-r7.
20. Flicek, P. *et al.* Ensembl's 10th year. *Nucl. Acids Res.* **38**, D557-D562 (2010). doi:10.1093/nar/gkp972.
21. The UniProt Consortium. Ongoing and future developments at the Universal Protein Resource. *Nucl. Acids Res.* **39**, D214-D219 (2011). doi:10.1093/nar/gkq1020.
22. Slater, G. S. & Birney, E. Automated generation of heuristics for biological sequence comparison. *BMC Bioinformatics* **6**, 31 (2005).
23. Korf, I. Gene finding in novel Genomes. *BMC Bioinformatics* **5**, 59 (2004). doi:10.1186/1471-2105-5-59.
24. Conesa, A. *et al.* Blast2GO: a universal tool for annotation, visualization and analysis in functional genomics research. *Bioinformatics* **21**, 3674-3676 (2005).
25. Waterhouse, R. M., Zdobnov, E. M., Tegenfeldt, F., Li, J. & Kriventseva, E. V. OrthoDB: the hierarchical catalog of eukaryotic orthologs in 2011. *Nucleic Acids Res.* **39**, D283-D288 (2011).
26. Edgar, R. MUSCLE: multiple sequence alignment with high accuracy and high throughput. *Nucl. Acids Res.* **32**, 1792-1797 (2004).
27. Castresana, J. Selection of conserved blocks from multiple alignments for their use in phylogenetic analysis. *Mol. Biol. Evol.* **17**, 540-552 (2000).
28. Guindon, S. *et al.* New algorithms and methods to estimate maximum-likelihood phylogenies: assessing the performance of PhyML 3.0. *Syst. Biol.* **59**, 307-321 (2010).
29. Rogozin, I. B., Wolf, Y. I., Sorokin, A. V., Mirkin, B. G. & Koonin, E. V., Remarkable interkingdom conservation of intron positions and massive, lineage-specific intron loss and gain in eukaryotic evolution. *Curr. Biol.* **13**, 1512-1517 (2003).
30. Rogozin, I. B., Lyons-Weiler, J. & Koonin, E. V. Intron sliding in conserved gene families. *Trends Genet.* **16**, 430-432 (2000).
31. Felsenstein, J. Coalescents in full bloom. *Evolution* **63**, 3275-3276 (2009). doi:10.1111/j.1558-5646.2009.00811.x.
32. Junier, T. & Zdobnov, E. M. The Newick utilities: high-throughput phylogenetic tree processing in the Unix shell. *Bioinformatics* **26**, 1669-1670 (2010).

33. Csurös, M. *et al.* Malin: maximum likelihood analysis of intron evolution in eukaryotes. *Bioinformatics* **24**, 1538-1539 (2008).
34. Colbourne, J. K. *et al.* The ecoresponsive genome of *Daphnia pulex*. *Science* **331**, 555-561 (2011).
35. Li, L., Stoeckert, C. J. Jr. & Roos, D. S. OrthoMCL: identification of ortholog groups for eukaryotic genomes. *Genome Res.* **13**, 2178-2189 (2003).
36. Chen, F., Mackey, A. J., Vermunt, J. K. & Roos, D. S. Assessing performance of orthology detection strategies applied to eukaryotic genomes. *PLoS ONE* **2**(4): e383, (2007). doi:10.1371/journal.pone.0000383.
37. Schlueter, J. *et al.* Mining EST databases to resolve evolutionary events in major crop species. *Genome.* **47**, 868-876 (2004).
38. Rice, P., Longden, I. & Bleasby, A. EMBOSS: the European molecular biology open software suite. *Trends Genet.* **16**, 276–277 (2000).
39. Lynch, M. & Conery, J. The evolutionary fate and consequences of duplicate genes. *Science* **290**, 1151-1155 (2000).
40. Benson, G. Tandem repeats finder: a program to analyze DNA sequences. *Nucl. Acids Res.* **27**, 573–580 (1999).
41. Meyer, J. M., Kurtti, T. J., Van Zee, J. P. & Hill, C. A. Genome organization of major tandem repeats in the hard tick, *Ixodes scapularis*. *Chrom. Res.* **18**, 357-370 (2010).
42. Tu, Z. Eight novel families of miniature inverted repeat transposable elements in the African malaria mosquito, *Anopheles gambiae*. *Proc. Natl. Acad. Sci U.S.A.* **98**, 1699-1704 (2001).
43. McCarthy, E. M. & McDonald, J. F. LTR\_STRUC: a novel search and identification program for LTR retrotransposons. *Bioinformatics* **19**, 362-367 (2003).
44. Tubio, J. M., Naveira, H. & Costas, J. Structural and evolutionary analyses of the Ty3/gypsy group of LTR retrotransposons in the genome of *Anopheles gambiae*. *Mol. Biol. Evol.* **22**, 29-39 (2005).
45. Tubio, J. M. *et al.* Evolutionary dynamics of the Ty3/gypsy LTR retrotransposons in the genome of *Anopheles gambiae*. *PloS ONE* **6**, e16328, (2011). doi:10.1371/journal.pone.0016328.
46. Jurka, J. *et al.* Repbase update, a database of eukaryotic repetitive elements. *Cytogenet Genome Res.* **110**, 462-467 (2005).
47. Altschul, S. F. *et al.* Gapped BLAST and PSI-BLAST: a new generation of protein database search programs. *Nucl. Acids Res.* **25**, 3389-3402 (1997).
48. Tatusova, T. A. & Madden, T. L. Blast 2 sequences-a new tool for comparing protein and nucleotide sequences. *FEMS Microbiol. Lett.* **174**, 247-250 (1999).

49. Kennedy, R. C., Unger, M. F., Christley, S., Collins, F. H. & Madey, G. R. An automated homology-based approach for identifying transposable elements. *BMC Bioinformatics* **12**, 130, (2011). doi:10.1186/1471-2105-12-130.
50. Xiong, Y. & Eickbush, T. H. Origin and evolution of retroelements based upon their reverse transcriptase sequences. *EMBO J.* **9**, 3353-3362 (1990).
51. Malik, H. S., Burke, W. D. & Eickbush, T. H. The age and evolution of non-LTR retrotransposable elements. *Mol. Biol. Evol.* **16**, 793–805 (1999).
52. Guindon, S. & Gascuel, O. A Simple, Fast, and Accurate Algorithm to Estimate Large Phylogenies by Maximum Likelihood. *Syst. Biol.* **5**, 696-704 (2003).
53. Lander, E. S. *et al.* Initial sequencing and analysis of the human genome. *Nature* **409**, 860-921 (2001).
54. Holt, R. A. *et al.* The genome sequence of the malaria mosquito *Anopheles gambiae*. *Science* **298**, 129-149 (2002).
55. Lovsin, N., Gubensek, F. & Kordi, D. Evolutionary dynamics in a novel L2 clade of non-LTR retrotransposons in Deuterostomia. *Mol. Biol. Evol.* **18**, 2213–2224 (2001).
56. Biedler, J. & Tu, Z. Non-LTR retrotransposons in the African malaria mosquito, *Anopheles gambiae*: unprecedented diversity and evidence of recent activity. *Mol. Biol. Evol.* **20**, 1811–1825 (2003).
57. Arensburger, P. *et al.* Sequencing of *Culex quinquefasciatus* establishes a platform for mosquito comparative genomics. *Science* **330**, 86-88 (2010).
58. Jakubczak, J. L., Burke, W. D. & Eickbush, T. H. Retrotransposable elements R1 and R2 interrupt the rRNA genes of most insects. *Proc. Natl. Acad. Sci. U.S.A.* **88**, 3295–3299 (1991).
59. Felger, I. & Hunt, J. A. A non-LTR retrotransposon from the Hawaiian *Drosophila*: the LOA element. *Genetica* **85**, 119–130 (1992).
60. Munderloh, U. G., Liu, Y., Wang, M., Chen, C. & Kurtti, T. J. Establishment, maintenance and description of cell lines from the tick *Ixodes scapularis*. *J. Parasitol.* **80**, 533–543 (1994).
61. Chen, C., Munderloh, U. G. & Kurtti, T. J. Cytogenetic characteristics of cell lines from *Ixodes scapularis* (Acari: Ixodidae). *J. Med. Entomol.* **31**, 425-434 (1994).
62. Zwick, M. S. *et al.* A rapid procedure for the isolation of C<sub>0</sub>t-1 DNA from plants. *Genome* **40**, 138-142 (1997).
63. Vítková, M., Král, J., Traut, W., Zrzavy, J. & Marec, F. The evolutionary origin of insect telomeric repeats, (TTAGG)<sub>n</sub>. *Chromosome Res.* **13**, 145-156 (2005).
64. Francischetti, I. M. B., Sá-Nunes, A., Mans, B. J., Santos, I. M. & Ribeiro, J. M. C. The role of saliva in tick feeding. *Front. Biosci.* **14**, 2051-2088 (2009).
65. Ribeiro, J. M. & Arca, B. From sialomes to the sialoverse: An insight into the salivary potion of blood feeding insects. *Adv. Insect Physiol.* **37**, 59-118 (2009).

66. Arca, B. *et al.* An updated catalogue of salivary gland transcripts in the adult female mosquito, *Anopheles gambiae*. *J. Exp. Biol.* **208**, 3971-3986 (2005).
67. Panzera, F. *et al.* Genome size determination in chagas disease transmitting bugs (hemiptera-triatominae) by flow cytometry. *Am. J. Trop. Med. Hyg.* **76**, 516-521 (2007).
68. Kondrashov, F. A., Rogozin, I. B., Wolf, Y. I. & Koonin, E. V. Selection in the evolution of gene duplications. *Genome Biol.* **3**, research0008, doi:10.1186/gb-2002-3-2-research0008 (2002).
69. Sankoff, D. Gene and genome duplication. *Curr. Opin. Genet. Dev.* **11**, 681-684 (2001).
70. Ascenzi, P. *et al.* The bovine basic pancreatic trypsin inhibitor (Kunitz inhibitor): a milestone protein. *Curr. Protein Pept. Sci.* **4**, 231-251 (2003).
71. Castaneda, O. & Harvey, A. L. Discovery and characterization of cnidarian peptide toxins that affect neuronal potassium ion channels. *Toxicon.* **54**, 1119-11124 (2009).
72. Harvey, A. L. Recent studies on dendrotoxins and potassium ion channels. *Gen. Pharmacol.* **28**, 7-12 (1997).
73. Paesen, G. C. *et al.* An ion-channel modulator from the saliva of the brown ear tick has a highly modified Kunitz/BPTI structure. *J. Mol. Biol.* **389**, 734-47 (2009).
74. Ribeiro, J. M. *et al.* An annotated catalog of salivary gland transcripts from *Ixodes scapularis* ticks. *Insect Biochem. Mol. Biol.* **36**, 111-129 (2006).
75. Valenzuela, J. G. *et al.* Exploring the sialome of the tick, *Ixodes scapularis*. *J. Exp. Biol.* **205**, 2843-2864 (2002).
76. Kotsyfakis, M., Karim, S., Andersen, J. F., Mather, T. N. & Ribeiro, J. M. Selective cysteine protease inhibition contributes to blood-feeding success of the tick *Ixodes scapularis*. *J. Biol. Chem.* **282**, 29256-29263 (2007).
77. Schultz, J., Copley, R. R., Doerks, T., Ponting, C. P. & Bork, P. SMART: a web-based tool for the study of genetically mobile domains. *Nucleic Acids Res.* **28**, 231-234 (2000).
78. Campbell, C. L. *et al.* Midgut and salivary gland transcriptomes of the arbovirus vector *Culicoides sonorensis* (Diptera: Ceratopogonidae). *Insect Mol. Biol.* **14**, 121-36 (2005).
79. Wilson, A. D., Heesom, K. J., Mawby, W. J., Mellor, P. S. & Russell, C. L. Identification of abundant proteins and potential allergens in *Culicoides nubeculosus* salivary glands. *Vet. Immunol. Immunopathol.* **122**, 94-103 (2008).
80. Andersen, J. F., Pham, V. M., Meng, Z., Champagne, D. E. & Ribeiro, J. M. Insight into the Sialome of the Black Fly, *Simulium vittatum*. *J. Proteome Res.* **8**, 1474-1488 (2009).
81. Francischetti, I. M., Mather, T. N. & Ribeiro, J. M. Penthalaris, a novel recombinant five-Kunitz tissue factor pathway inhibitor (TFPI) from the salivary gland of

the tick vector of Lyme disease, *Ixodes scapularis*. *Thromb. Haemost.* **91**, 886-898 (2004).

82. Francischetti, I. M., Valenzuela, J. G., Andersen, J. F., Mather, T. N. & Ribeiro, J. M. Ixolaris, a novel recombinant tissue factor pathway inhibitor (TFPI) from the salivary gland of the tick, *Ixodes scapularis*: identification of factor X and factor Xa as scaffolds for the inhibition of factor VIIa/tissue factor complex. *Blood* **99**, 3602-3612 (2002).

83. Benson, D. A., Karsch-Mizrachi, I., Lipman, D. J., Ostell, J. & Sayers, E. W. GenBank. *Nucl. Acids Res.* **40**, D32-D53 (2011). doi:[10.1093/nar/gkr1202](https://doi.org/10.1093/nar/gkr1202).

84. Lawson, D. *et al.* VectorBase: a home for invertebrate vectors of human pathogens. *Nucleic Acids Res.*, **35**, D503–D505 (2007).

85. Lawson, D. *et al.* VectorBase: a data resource for invertebrate vector genomics. *Nucleic Acids Res.* **37**, D583–D587 (2009).

86. Kersey, P. J. *et al.* Ensembl Genomes: an integrative resource for genome-scale data from non-vertebrate species. *Nucl. Acids Res.* **40**, D91-D97, (2011).doi:[10.1093/nar/gkr895](https://doi.org/10.1093/nar/gkr895).

87. Bateman, A. *et al.* The Pfam protein families database. *Nucl. Acids Res.* **32**, D138-D141 (2004). doi:[10.1093/nar/gkh121](https://doi.org/10.1093/nar/gkh121).

88. Hulo, N. *et al.* The PROSITE database. *Nucl. Acids Res.* **34**, D227-D230 (2006). doi:[10.1093/nar/gkj063](https://doi.org/10.1093/nar/gkj063).

89. Marchler-Bauer, A. *et al.* CDD: a Conserved Domain Database for the functional annotation of proteins. *Nuc. Acids Res.* **39**, D225-D229 (2011). doi:[10.1093/nar/gkq1189](https://doi.org/10.1093/nar/gkq1189).

90. Valanne, S., Wang, J. H. & Ramet, M. The *Drosophila* Toll signaling pathway. *J. Immunol.* **186**, 649-656 (2011).

91. Shin, S. W. *et al.* REL1, a homologue of *Drosophila* dorsal, regulates toll antifungal immune pathway in the female mosquito *Aedes aegypti*. *J. Biol. Chem.* **280**, 16499-16507 (2005).

92. Kim, J. H. *et al.* Comparison of the humoral and cellular immune responses between body and head lice following bacterial challenge. *Insect Biochem. Mol. Biol.* **41**, 332-339 (2011).

93. Gerardo, N. M. *et al.* Immunity and other defenses in pea aphids, *Acyrtosiphon pisum*. *Genome Biol.* **11**, R21 (2010). doi:[10.1186/gb-2010-11-2-r21](https://doi.org/10.1186/gb-2010-11-2-r21).

94. Goto, A. *et al.* Akirins are highly conserved nuclear proteins required for NF-κB-dependent gene expression in *Drosophila* and mice. *Nature Immunol.* **9**, 97-104 (2008).

95. de la Fuente, J. *et al.* The tick protective antigen, 4D8, is a conserved protein involved in modulation of tick blood ingestion and reproduction. *Vaccine* **24**, 4082-4095 (2006).

96. de la Fuente, J. *et al.* Functional genomic studies of tick cells in response to infection with the cattle pathogen, *Anaplasma marginale*. *Genomics* **90**, 712–722 (2007).

97. Kurscheid, S. *et al.* Evidence of a tick RNAi pathway by comparative genomics and reverse genetics screen of targets with known loss-of-function phenotypes in *Drosophila*. *BMC Mol. Biol.* **10**, 26 (2009). doi:10.1186/1471-2199-10-26.
98. Khvorova, A., Reynolds, A., Jayasena, S. D. Functional siRNAs and miRNAs exhibit strand bias. *Cell*. **115**, 209-216 (2003).
99. Schwarz, D. S., Hutvagner, G., Haley, B., Zamore, P. D. Evidence that siRNAs function as guides, not primers, in the *Drosophila* and human RNAi pathways. *Mol. Cell*. **10**, 537-548 (2002).
100. Hammond, S. M., Bernstein, E., Beach, D. & Hannon, G. J. An RNA-directed nuclease mediates post-transcriptional gene silencing in *Drosophila* cells. *Nature* **404**, 293-296 (2000).
101. Ding, S. W. RNA-based antiviral immunity. *Nat. Rev. Immunol.* **10**, 632-644 (2010).
102. Waterhouse, R. M. *et al.* Evolutionary dynamics of immune-related genes and pathways in disease-vector mosquitoes. *Science* **316**, 1738-1743 (2007).
103. Wang, Y. & Zhu, S. The defensin gene family expansion in the tick *Ixodes scapularis*. *Dev. Comp. Immunol.* **35**, 1128-1134 (2011).
104. Neese, P. A., Sonenshine, D. E., Kallapur, V. L., Apperson, C. S. & Roe, R. M. Absence of insect juvenile hormones in the American dog tick, *Dermacentor variabilis* (Say) (Acari: Ixodidae) and *Ornithodoros parkeri* Cooley (Acari: Argasidae). *J Insect Physiol.* **46**, 477-490 (2000).
105. Thompson, D. M. *et al.* *In vivo* role of 20-hydroxyecdysone in the regulation of the vitellogenin mRNA and egg development in the American dog tick, *Dermacentor variabilis* (Say). *J. Insect Physiol.* **51**, 1105-1116 (2005).
106. Pound, J. M., Oliver, J. H. Jr. Juvenile hormone: evidence of its role in the reproduction of ticks. *Science*. **206**, 355-357 (1979).
107. Donohue, K. V., Khalil, M. S., Mitchell, R. D., Sonenshine, D. E. & Roe, R. M. Molecular characterization of the major hemelipoglycoprotein in ixodid ticks. *Insect Mol. Biol.* **17**, 197-208 (2008).
108. Rutherford, K. *et al.* Artemis: sequence visualization and annotation. *Bioinformatics* **16**, 944-945 (2000).
109. Law, J. H., Ribeiro, J. M. C. & Wells, M. A. Biochemical insights derived from insect diversity. *Ann. Rev. Biochem.* **64**, 87-111 (1992).
110. Mans, J. B. & Neitz, A. W. H. Adaptation of ticks to a blood-feeding environment: evolution from a functional prospective. *Insect Biochem. Mol. Biol.* **34**, 1-17 (2004).
111. Braz, G. R. C., Coelho, H. S. L., Masuda, H. & Oliveira, P. L. A missing metabolic pathway in the cattle tick *Boophilus microplus*. *Curr. Biol.* **9**, 703-706 (1999).

112. Hamza, I., Chauhan, S., Hassett, R. & O'Brian, M. R. The bacterial *irr* protein is required for coordination of heme biosynthesis with iron availability. *J. Biol. Chem.* **273**, 21669-21674 (1998).
113. Furuyama, K., Kaneko, K. & Vargas, P. D. Heme as a magnificent molecule with multiple missions: heme determines its own fate and governs cellular homeostasis. *Tohoku J. Exp. Med.* **213**, 1-16 (2007).
114. Machado, E. A., Oliveira, P. L., Moreira, M. F., de Souza, W. & Masuda, H. Uptake of *Rhodnius* heme-binding protein (RHBP) by the ovary of *Rhodnius prolixus*. *Arch. Insect Biochem. Physiol.* **39**, 133-143 (1998).
115. Oliveira, P. L. *et al.* A heme-binding protein from hemolymph and oocytes of the blood-sucking insect, *Rhodnius prolixus*. Isolation and characterization. *J. Biol. Chem.* **270**, 10897-10901 (1995).
116. Weichsel, A., Andersen, J. F., Champagne, D. E., Walker, F. A. & Montfort, W. R. Crystal structures of a nitric oxide transport protein from a blood-sucking insect. *Nat. Struct. Biol.* **5**, 304-309 (1998).
117. Donohue, K. V., Khalil, S. M. S., Sonenshine, D. E. & Roe, R. M. Heme-binding storage proteins in the Chelicerata. *J. Insect Physiol.* **55**, 287-296 (2009).
118. Horigane, M., Shinoda, T., Honda, H. & Taylor, D. Characterization of a vitellogenin gene reveals two phase regulation of vitellogenesis by engorgement and mating in the soft tick *Ornithodoros moubata* (Acari: Argasidae). *Insect Mol. Biol.* **19**, 501-515 (2010).
119. Maya-Monteiro, C. M. *et al.* HeLp, a heme lipoprotein from the hemolymph of the cattle tick, *Boophilus microplus*. *J. Biol. Chem.* **275**, 36584-36589 (2000).
120. Horn, M., *et al.* Hemoglobin digestion in blood-feeding ticks: mapping a multi-peptidase pathway by functional proteomics. *Chem Biol.* **16**, 1053-1063 (2009).
121. Yamaji, K. *et al.* Hemoglobinase activity of a cysteine protease from the ixodid tick *Haemaphysalis longicornis*. *Parasitol Int.* **58**, 232-237 (2009).
122. Estrela A. B., Seixas, A., Teixeira Vde, O., Pinto, A. F. & Termignoni, C. Vitellin- and hemoglobin-digesting enzymes in *Rhipicephalus (Boophilus) microplus* larvae and females. *Comp. Biochem. Physiol. B Biochem. Mol. Biol.* **157**, 326-335 (2010).
123. Lara, F. A. *et al.* A new intracellular pathway of haem detoxification in the midgut of the cattle tick *Boophilus microplus*: aggregation inside a specialized organelle, the hemosome. *J. Exp. Biol.* **206**, 1707-1715 (2003).
124. Caffrey, C.R. & Ruppel, A. Cathepsin B-like activity predominates over cathepsin L-like activity in adult *Schistosoma mansoni* and *S. japonicum*. *Parasitol. Res.* **83**, 632-635 (1997).
125. Delcroix, M. *et al.* A multienzyme network functions in intestinal protein digestion by a platyhelminth parasite. *J. Biol. Chem.* **281**, 39316-39329 (2006).
126. Guerrero, F. D. *et al.* BmiGl: a database of cDNAs expressed in *Boophilus microplus*, the tropical/southern cattle tick. *Insect Biochem. Mol. Biol.* **35**, 585-595 (2005).

127. Weygoldt, P. Evolution and systematics of the Chelicerata. *Exp. Appl. Acarol.* **22**, 63-79 (1998).
128. Donohue, K. V. *et al.* Neuropeptide signaling sequences identified by pyrosequencing of the American dog tick synganglion transcriptome during blood feeding and reproduction. *Insect Biochem. Mol. Biol.* **40**, 79-90 (2010).
129. Egekwu, N., Sonenshine, D.E., Bissinger, B.W. & Roe, R.M. Transcriptome of the female synganglion of the black-legged tick *Ixodes scapularis* (Acari: Ixodidae) with comparison between Illumina and 454 systems. *PLoS One* **9**:e102667 (2014).
130. Simo, L., Slovak, M., Park, Y. & Žitňan, D. Identification of a complex peptidergic neuroendocrine network in the hard tick *Rhipicephalus appendiculatus*. *Cell Tissue Res.* **335**, 639–655 (2009).
131. Audsley, N. & Weaver, R. J. Neuropeptides associated with the regulation of feeding in insects. *Gen. Comp. Endocrinol.* **162**, 93-104 (2009).
132. Luo, C. W. *et al.* Bursicon, the insect cuticle-hardening hormone, is a heterodimeric cysteine knot protein that activates G protein-coupled receptor LGR2. *PNAS.* **102**, 2820-2825 (2005).
133. Wu, Q. & Brown, M. R. Signaling and function of insulin-like peptides in insects. *Annu. Rev. Entomol.* **51**, 1–24 (2006).
134. Gu, S.H., Lin, J.L., Lin, P.L. & Chen, C.H. Insulin stimulates ecdysteroidogenesis by prothoracic glands in the silkworm, *Bombyx mori*. *Insect Biochem. Mol. Biol.*, **39**, 171-179 (2009).
135. Mulenga, A. & Khumthong, R. Silencing of three *Amblyomma americanum* (L.) insulin-like growth factor binding protein-related proteins prevents ticks from feeding to repletion. *J. Exp. Biol.* **231**, 1153-1161 (2010).
136. Zhu, X. X. & Oliver, J. H. Jr. Cockroach allatostatin-like immunoreactivity in the synganglion of the American dog tick *Dermacentor variabilis* (Acari: Ixodidae). *Exp. Appl. Acarol.* **25**, 1005-1013 (2001).
137. Lee, M. C., Schiffman, S. S. & Pappas, T. N. Role of neuropeptides in the regulation of feeding behavior: a review of cholecystokinin, bombesin, neuropeptide Y and galanin. *Neurosci. Biobehav. Rev.* **18**, 313-323 (1994).
138. Sauer, J. R., Essenberg, R. C. & Bowman, A. S. Salivary glands in ixodid ticks: control and mechanism of secretion. *J. Insect Physiol.* **46**, 1069-1078 (2000).
139. Simo, L. M., Žitňan, D. & Park, Y. Two novel neuropeptides in innervations of the salivary glands of the black-legged tick, *Ixodes scapularis*: Myoinhibitory peptide and SIFamide. *J. Comp. Neurol.* **517**, 551-563 (2009).
140. Yang, Y., Bajracharya, P., Castillo, P., Nachman, R. J. & Pietrantonio, P. V. Molecular and functional characterization of the first tick CAP<sub>2b</sub> (periviscerokinin) receptor from *Rhipicephalus (Boophilus) microplus* (Acari: Ixodidae). *Gen. Comp. Endo.* **194**, 142–151 (2013). doi:10.1016/j.ygcen.2013.09.001

141. Yang, Y., Nachman, R.J. & Pietrantonio, P.V. Molecular and pharmacological characterization of the Chelicerata pyrokinin receptor from the southern cattle tick, *Rhipicephalus (Boophilus) microplus*. *Insect Biochem. Mol. Biol.* **60**, 13–23 (2015). doi:10.1016/j.ibmb.2015.02.010
142. Neupert, S. *et al.* The neuropeptidomics of *Ixodes scapularis* synganglion, *J. Proteomics*. **72**, 1040-1045 (2009).
143. Hill, C. A. *et al.* G protein-coupled receptors in *Anopheles gambiae*. *Science* **298**, 176-178 (2002).
144. Nene, V. *et al.* Genome sequence of *Aedes aegypti*, a major arbovirus vector. *Science* **316**, 1718-1723 (2007).
145. Vieira, F. G. & Rozas, J. Comparative genomics of the odorant-binding and chemosensory protein gene families across the Arthropoda: origin and evolutionary history of the chemosensory system. *Genome Biol. Evol.* **3**, 476-490 (2011).
146. Starostina, E., Xu, A., Lin, H. & Pikielny, C. W. A *Drosophila* protein family implicated in pheromone perception is related to Tay-Sachs GM2-activator protein. *J. Biol. Chem.* **284**, 585-594 (2009).
147. Foret, S. & Maleszka, R. Function and evolution of a gene family encoding odorant binding-like proteins in a social insect, the honey bee (*Apis mellifera*). *Genome Res.* **16**, 1404-1413 (2006).
148. Foret, S., Wanner, K. W. & Maleszka, R. Chemosensory proteins in the honey bee: Insights from the annotated genome, comparative analyses and expressional profiling. *Insect Biochem. Mol. Biol.* **37**, 19-28 (2007).
149. Gong, D. P. *et al.* Identification and expression pattern of the chemosensory protein gene family in the silkworm, *Bombyx mori*. *Insect Biochem. Mol. Biol.* **37**, 266-277 (2007).
150. Gong, D. P., Zhang, H. J., Zhao, P., Xia, Q. Y. & Xiang, Z. H. The odorant binding protein gene family from the genome of silkworm, *Bombyx mori*. *BMC Genomics* **10**, 332 (2009). doi:10.1186/1471-2164-10-332.
151. Vieira, F. G., Sánchez-Gracia, A. & Rozas, J. Comparative genomic analysis of the odorant-binding protein family in 12 *Drosophila* genomes: purifying selection and birth-and-death evolution. *Genome Biol.* **8**, R235 (2007). doi:10.1186/gb-2007-8-11-r235.
152. Flicek, P. *et al.* Ensembl 2008. *Nucl. Acids Res* **36**, D707 (2008). doi:10.1093/nar/gkm988.
153. Soding, J. Protein homology detection by HMM-HMM comparison. *Bioinformatics* **21**, 951-960 (2005).
154. Finn, R. D. *et al.* Pfam: clans, web tools and services. *Nucl. Acids Res.* **34**, D247-D251 (2006). doi:10.1093/nar/gkj149.
155. Katoh, K., Kuma, K., Toh, H. & Miyata, T. MAFFT version 5: improvement in accuracy of multiple sequence alignment. *Nucl. Acids Res.* **33**, 511-518 (2005).

156. Peñalva-Arana, D. C., Lynch, M. & Robertson, H. M. The chemoreceptor genes of the waterflea, *Daphnia pulex*: many Grs but no Ors. *BMC Evol. Biol.* **9**, 79 (2009). doi:10.1186/1471-2148-9-79.
157. Robertson, J. A., Howard, L. A., Zinner, C. L. & Stemke, G. W. Comparison of 16S rRNA genes within the T960 and parvo biovars of ureaplasmas isolated from humans. *Int. J. Syst. Bacteriol.* **44**, 836-838 (1994).
158. Stamatakis, A., RAxML-VI-HPC: maximum likelihood-based phylogenetic analyses with thousands of taxa and mixed models. *Bioinformatics* **22**, 2688-2690 (2006).
159. Croset, V. *et al.* Ancient protostome origin of chemosensory ionotropic glutamate receptors and the evolution of insect taste and olfaction. *PLoS Genetics* **6**, e1001064, (2010). doi:10.1371/journal.pgen.1001064.
160. Kozomara, A. & Griffiths-Jones, S. miRBase: integrating microRNA annotation and deep-sequencing data. *Nucl. Acids Res.* **39**, D152-D157 (2011). doi:10.1093/nar/gkq1027.
161. Gerlach, D., Kriventseva, E. V., Rahman, N., Vejnar, C.E. & Zdobnov, E.M. miROrtho: Computational survey of microRNA genes. *Nucleic Acids Res.* **37**:D111–D117, (2009). doi:10.1093/nar/gkn707.
162. Giraldo-Calderón, G. I. *et al.* VectorBase: an updated bioinformatics resource for invertebrate vectors and other organisms related with human diseases. *Nuc. Acids Res.* **43**(Database issue), D707-13 (2015).
163. Grbić, M. *et al.* The genome of *Tetranychus urticae* reveals herbivorous pest adaptations. *Nature* **479**, 487-492 (2011).
164. Kirkness, E. F. *et al.* Genome sequences of the human body louse and its primary endosymbiont provide insights into the permanent parasitic lifestyle. *Proc. Natl. Acad. Sci. U.S.A.* **107**, 12168-12173 (2010).
165. Munderloh, U. & Kurtti, T. Formulation of medium for tick cell culture. *Exp. Appl. Acarol.* **7**, 219-229 (1989).
166. Riley, C. P. *et al.* The Proteome Discovery Pipeline – A data analysis pipeline for mass spectrometry-based differential proteomics discovery. *The Open Proteomics J.* **3**, 8-19 (2010).
167. Zhang, X., Asara, J. M., Adamec, J., Ouzzani, M. & Elmagarmid, A. K. Data preprocessing in liquid chromatography-mass spectrometry-based proteomics. *Bioinformatics* **21**, 4054-4059 (2005).
168. Riley, C. P. *et al.* A large, consistent plasma proteomics data set from prospectively collected breast cancer patient and healthy volunteer samples. *J. Transl. Med.* **9**, 80 (2011).
169. Kapp, E. A. *et al.* An evaluation, comparison, and accurate benchmarking of several publicly available MS/MS search algorithms: Sensitivity and specificity analysis. *Proteomics* **5**, 3475-3490 (2005).

170. Munderloh, U. G. *et al.* Invasion and intracellular development of the human granulocytic ehrlichiosis agent in tick cell culture. *J. Clin. Microbiol.* **37**, 2518–2524 (1999).
171. Villar, M. *et al.* Identification and characterization of *Anaplasma phagocytophilum* proteins involved in infection of the tick vector, *Ixodes scapularis*. *PLOS ONE* **10**, e0137237 (2015). doi: 10.1371/journal.pone.0137237.
172. Bonzon-Kulichenko, E. *et al.* A robust method for quantitative high-throughput analysis of proteomes by  $^{18}\text{O}$  labeling. *Mol. Cell Proteomics* **10**:M110 003335 (2011). doi:10.1074/mcp.M110.003335.
173. López-Ferrer, D. *et al.* Statistical model for large-scale peptide identification in databases from tandem mass spectra using SEQUEST. *Anal Chem.* **76**, 6853-6860 (2004).
174. Navarro, P. & Vazquez, J. A. refined method to calculate false discovery rates for peptide identification using decoy databases. *J. Proteome Res.* **8**, 1792-1796 (2009).
175. Catchen, J. M., Amores, A., Hohenlohe, P., Cresko, W. & Postlethwait, J. H. Stacks: building and genotyping Loci de novo from short-read sequences. *G3 (Bethesda)* **1**, 171-82 (2011). doi: 10.1534/g3.111.000240.
176. Catchen, J., Hohenlohe, P. A., Bassham, S., Amores, A. & Cresko, W. A. Stacks: an analysis tool set for population genomics. *Mol Ecol.* **22**, 3124-3140 (2013). doi: 10.1111/mec.12354
177. Langmead, B. & Salzberg, S.L. Fast gapped-read alignment with Bowtie 2. *Nat. Methods* **9**, 357-359 (2012).
178. Wright, S. Evolution and the Genetics of Population, Variability Within and Among Natural Populations. The University of Chicago Press, Chicago (1978).
179. Hohenlohe, P. A. *et al.* Population Genomics of Parallel Adaptation in Threespine Stickleback using Sequenced RAD Tags. *PLoS Genet.* **6**: e1000862. doi:10.1371/journal.pgen.1000862 (2010).
180. Nielsen, R. *et al.* Darwinian and demographic forces affecting human protein coding genes Darwinian and demographic forces affecting human protein coding genes. *Genome Research* **19**, 838–849 (2009). doi:10.1101/gr.088336.108
181. Weir, B. & Cockerham, C. C. Estimating F-Statistics for the Analysis of Population Structure. *Evolution* **38**(6), 1358–1370 (1984).
182. Raj, A., Stephens, M. & Pritchard, J. K. fastSTRUCTURE: variational inference of population structure in large SNP data sets. *Genetics* **197**:573-89. doi: 10.1534/genetics.114.164350 (2014).
183. Rosenberg, N. A., DISTRUCT: a program for the graphical display of population structure. *Mol. Ecol. Notes* **4**, 137–138 (2004).
184. Buckingham, S. D., Pym, L. & Sattelle, D. B. Oocytes as an expression system for studying receptor / channel targets of drugs and pesticides. *Methods in Molecular Biology* **322**, 331-345. (ed X. J. Liu) Humana Press Inc., Totowa, NJ, USA. (2006).

185. Guittard, E. *et al.* CYP18A1, a key enzyme of *Drosophila* steroid hormone inactivation, is essential for metamorphosis. *Dev. Biol.* **349**, 35-45 (2011). doi: 10.1016/j.ydbio.2010.09.023.
186. Jongejan, F. & Uilenberg, G. The global importance of ticks. *Parasitology* **129**(Suppl):S3-S14 (2004). doi: <http://dx.doi.org/10.1017/S0031182004005967>
187. Van Zee, P. *et al.* Tick genomics: the *Ixodes* genome project and beyond. *Intl. J. Parasitol.* **37** (12) 1297-1305 (2007).
